# Supplementary material for: Enantioselective organocatalytic domino Michael–acetalization–Henry reactions of 2-hydroxynitrostyrene and aldehyde for the synthesis of tetrahydro-6H-benzo[c]chromenones
Source: Royal Society of Chemistry journal article supplement (doi:10.1039/c0ob00834f), 2010-11-03
Supplement: c0ob00834f.pdf [file c0ob00834f.pdf]

# Enantioselective Organocatalytic Domino Michael–Acetalization–Henry Reactions of 2-Hydroxynitrostyrene and Aldehyde for the Synthesis of Tetrahydro-6*H*-benzo[*c*]chromenones

Bor-Cherng Hong,\* Prakash Kotame, and Ju-Hsiou Liao

*Department of Chemistry and Biochemistry, National Chung Cheng University, Chia-Yi, 621, Taiwan, R.O.C.*

*chebch@ccu.edu.tw*

## SUPPORTING INFORMATION:

- Contents: (1) Experimental procedures and characterization data for compounds **3a-3o**.  
(2) Spectra data for compounds **3a-3o**.  
(3) *Ee* analysis by HPLC with chiral column, in Table 2.

**General Procedure.** All solvents were reagent grade. L-proline (99+%) was purchased from Bachem. Other chemicals were purchased from Aldrich or Acros Chemical Co. Reactions were normally carried out under argon atmosphere in glassware. Merck silica gel 60 (particle size 0.04-0.063 mm) was employed for flash chromatography. Melting points are uncorrected. <sup>1</sup>H NMR spectra were obtained in CDCl<sub>3</sub> unless otherwise noted at 400 MHz (Bruker DPX-400) or 500 MHz (Varian-Unity INOVA-500). <sup>13</sup>C NMR spectra were obtained at 100 MHz or 125 MHz. *E.e.* values were measured by HPLC on a chiral column (chiralpak IA or chiralcel OD-H, 0.46 cm ID x 25 cm, particle size 5 μ) by elution with IPA-hexane. The flow rate of the indicated elution solvent is maintained at 1 mL/min, and the retention time of a compound is recorded accordingly. HPLC was equipped with the ultraviolet and refractive index detectors. The melting point was recorded on a melting point apparatus (MPA100 – Automated melting point system, Stanford Research Systems, Inc.) and is uncorrected. The optical rotation values were recorded with a Jasco-P-2000 digital polarimeter.

**Representative procedure for the preparation of compound 3a in 95% EtOH (Table 2, entry 1).**

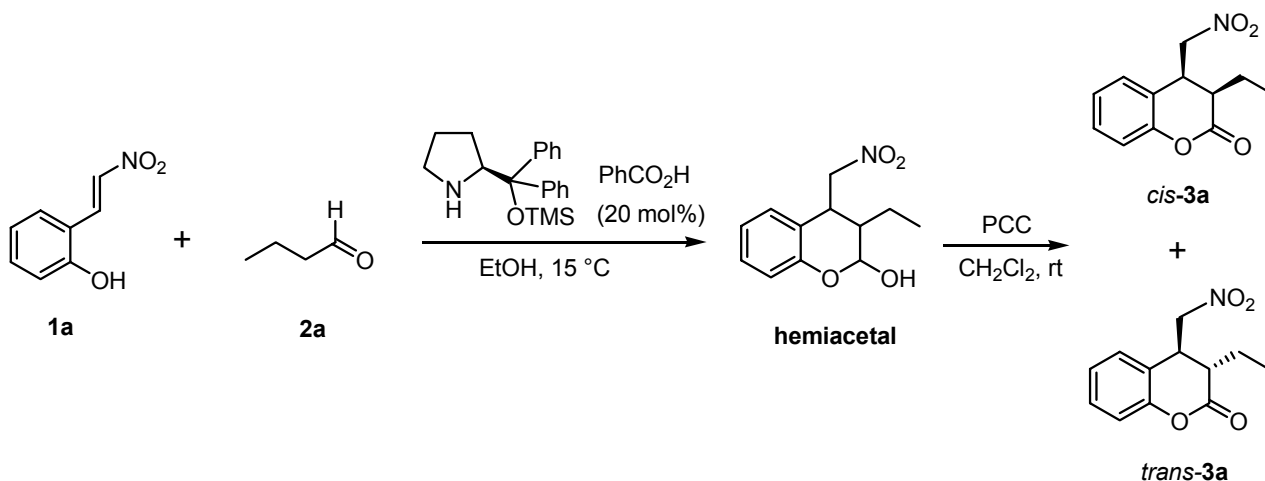

To a solution of *trans*-2-hydroxy-β-nitrostyrene (**1a**, 50 mg, 0.3 mmol), catalyst **I** (20 mg, 0.06 mmol) and benzoic acid (7.3 mg, 0.06 mmol) in 95% EtOH (1.5 mL) was added a solution of butyraldehyde (**2a**, 131 mg, 1.82 mmol) in 95% EtOH (1.5 mL). The resulting solution was stirred at 15 °C for 48 h until the completion of reaction, monitored by TLC. The resulting mixture was extracted with EtOAc (20 mL), washed with brine (5 mL), dried over Na<sub>2</sub>SO<sub>4</sub>, and concentrated *in vacuo* to give the crude product. The residue was purified by flash column chromatography with 12% EtOAc-hexane ( $R_f$  = 0.35 for the hemiacetal, in 20% EtOAc-hexane) to give the hemiacetal as a colorless oil (67 mg, 93% yield). A solution of the hemiacetal (55 mg, 0.23 mmol) in CH<sub>2</sub>Cl<sub>2</sub> (5 mL) and PCC (150 mg, 0.69 mmol) was stirred at ambient temperature for 20 h until the completion of reaction, monitored by TLC. The reaction mixture was diluted with EtOAc (25 mL), and filtered through Celite. The filtrate was concentrated *in vacuo* to give the crude product. The residue was purified by flash column chromatography with 10% EtOAc-hexane ( $R_f$  = 0.45 for *cis*-**3a**,  $R_f$  = 0.44 for *trans*-**3a** in 20% EtOAc-hexane) to give **3a** as a oil (*cis-trans* mixture 92:8, 45 mg, 82% yield). The pure *cis*-**3a** was obtained as a white solid (mp. 91-93 °C) by further purification. For *cis*-**3a**:  $[\alpha]_D^{23}$  -80 (c 1.5 CHCl<sub>3</sub>); IR (neat): 2969, 2880, 1767, 1554, 1378, 1151, 1095, 762 cm<sup>-1</sup>; <sup>1</sup>H NMR (CDCl<sub>3</sub>, 500 MHz):  $\delta$  7.33 (d,  $J$  = 7.7 Hz, 1 H), 7.14 (d,  $J$  = 7.7 Hz, 1 H), 7.11-7.07 (m, 2 H), 4.57 (dd,  $J$  = 12.4, 4.7 Hz, 1 H), 4.24 (t,  $J$  = 10.5 Hz, 1 H), 3.88 (dt,  $J$  = 10.5, 5.1 Hz, 1 H), 2.81 (dd,  $J$  = 12.4, 4.7 Hz, 1 H), 2.12-2.04 (m, 1 H), 1.57-1.51 (m, 1 H), 1.12 (t,  $J$  = 7.5 Hz, 3 H); <sup>13</sup>C NMR (CDCl<sub>3</sub>, 125 MHz): 168.8 (C), 150.8 (C), 130.1 (CH), 128.1 (CH), 124.9 (CH), 122.6 (C), 117.3 (CH), 75.4 (CH<sub>2</sub>), 43.3 (CH), 37.3 (CH), 19.9 (CH<sub>2</sub>), 11.9 (CH<sub>3</sub>); MS ( $m/z$ , relative intensity): 235 (M<sup>+</sup>, 23), 188 (100), 173 (39), 160 (66), 145 (44), 131 (63), 91 (64); exact mass calculate for C<sub>12</sub>H<sub>13</sub>NO<sub>4</sub> (M<sup>+</sup>): 235.0845; found (M<sup>+</sup>): 235.0842. For *trans*-**3a**:  $[\alpha]_D^{23}$  -44.4 (c 2 CHCl<sub>3</sub>); <sup>1</sup>H NMR (CDCl<sub>3</sub>, 500 MHz):  $\delta$  7.36 – 7.32 (m, 1 H), 7.21 (dd,  $J$  = 7.6, 1.0 Hz, 1 H), 7.14 (ddd,  $J$  = 7.5, 7.5, 1.0 Hz, 1 H), 7.07 (dd,  $J$  = 7.5, 1.0 Hz, 1H), 4.51-4.42 (m, 2 H), 3.73-3.70 (m, 1 H), 2.79-2.75 (m, 1 H), 1.63-1.49 (m, 2 H), 1.00 (t,  $J$  = 7.4 Hz, 3 H); <sup>13</sup>C NMR (CDCl<sub>3</sub>, 125 MHz):  $\delta$  168.0 (C), 150.7 (C), 130.2 (CH), 129.2 (CH), 125.3 (CH), 118.7 (C), 117.2 (CH), 78.1 (CH<sub>2</sub>), 44.3 (CH), 39.2 (CH), 23.6 (CH<sub>2</sub>), 11.4 (CH<sub>3</sub>).

### Representative procedure for the preparation of compound **3a** on water (Table 2, entry 1).

To a solution of *trans*-2-hydroxy- $\beta$ -nitrostyrene (**1a**, 50 mg, 0.3 mmol), catalyst **I** (20 mg, 0.06 mmol) and acetic acid (4 mg, 0.06 mmol) in H<sub>2</sub>O (0.5 mL) was added a solution of butyraldehyde (**2a**, 131 mg, 1.82 mmol). The resulting solution was stirred at 30 °C for 1 h until the completion of reaction, monitored by TLC. The resulting mixture was extracted with EtOAc (20 mL), washed with brine (5 mL), dried over Na<sub>2</sub>SO<sub>4</sub>, and concentrated *in vacuo* to give the crude product. The residue was purified by flash column chromatography with 12% EtOAc-hexane ( $R_f$  = 0.35 for the hemiacetal, in 20% EtOAc-hexane) to give the hemiacetal as a colorless oil (63 mg, 88% yield). The subsequent oxidation and the purification procedure are the same as the above reaction in 95% EtOH.

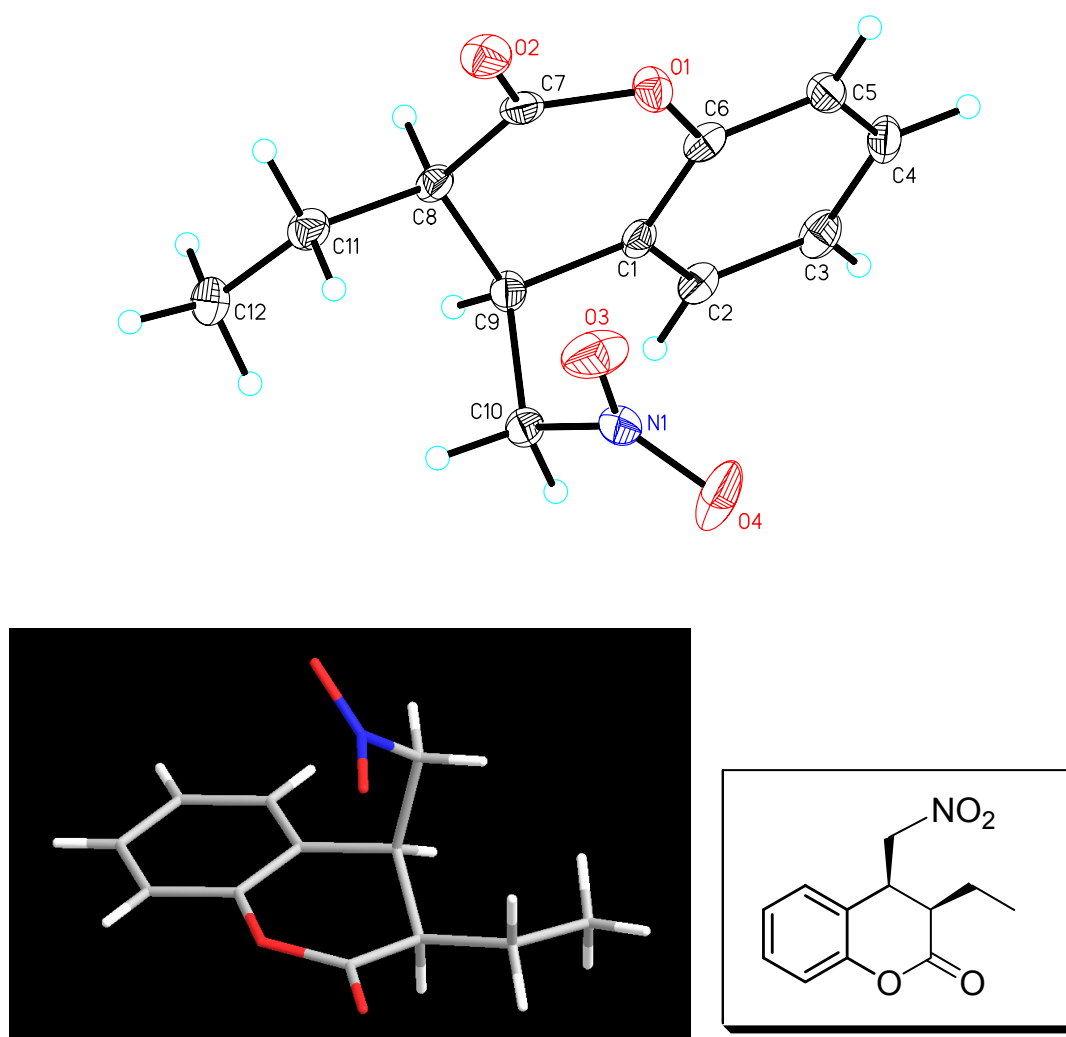

**Figure S1.** ORTEP and Stereo plots for X-ray crystal structures of (-)-*cis*-**3a**.

CCDC 794373 contains the supplementary crystallographic data for (-)-*cis*-**3a**. These data can be obtained free of charge from the Cambridge Crystallographic Data Centre via [www.ccdc.cam.ac.uk/data\\_request/cif](http://www.ccdc.cam.ac.uk/data_request/cif).

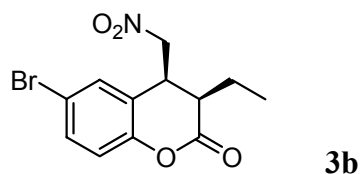

*cis*-**3b**: white solid; mp 123-126 °C,  $R_f = 0.48$  for *cis*-**3b** in 20% EtOAc-hexane,  $[\alpha]_D^{23} -42$  (c 1.0 CHCl<sub>3</sub>). IR (neat): 2962, 2926, 1771, 1555, 1413, 1378, 1147. 1096, 818 cm<sup>-1</sup>; <sup>1</sup>H NMR (CDCl<sub>3</sub>, 500 MHz):  $\delta$  7.45 (dd,  $J = 8.7, 2.0$  Hz, 1 H), 7.31 (d,  $J = 2.0$  Hz, 1 H), 6.97 (d,  $J = 8.7$  Hz, 1 H), 4.56 (dd,  $J = 12.8, 5.0$  Hz, 1 H), 4.31-4.26 (m, 1 H), 3.85 (dt,  $J = 10.0, 5.0$  Hz, 1 H), 2.78 (dd,  $J = 12.8, 10.0$  Hz, 1 H), 2.09-2.06 (m, 1 H), 1.55-1.51 (m, 1 H), 1.12 (t,  $J = 7.5$  Hz, 3 H); <sup>13</sup>C NMR (CDCl<sub>3</sub>, 125 MHz):  $\delta$  168.0 (C), 150.0 (C), 133.2 (CH), 130.9 (CH), 124.7 (C), 119.1 (CH), 117.5 (C), 74.9 (CH<sub>2</sub>), 43.0 (CH), 37.0 (CH), 19.9 (CH<sub>2</sub>), 11.9 (CH<sub>3</sub>); MS ( $m/z$ , relative intensity): 315 (M<sup>+</sup>+3, 55), 313 (M<sup>+</sup>+1, 56), 268 (100), 266 (99), 211 (33), 209 (32), 145 (41), 118 (42), 91 (15), 71 (50), 57 (70); exact mass calculate for C<sub>12</sub>H<sub>12</sub>BrNO<sub>4</sub> (M<sup>+</sup>): 312.9950; found (M<sup>+</sup>): 312.9947.

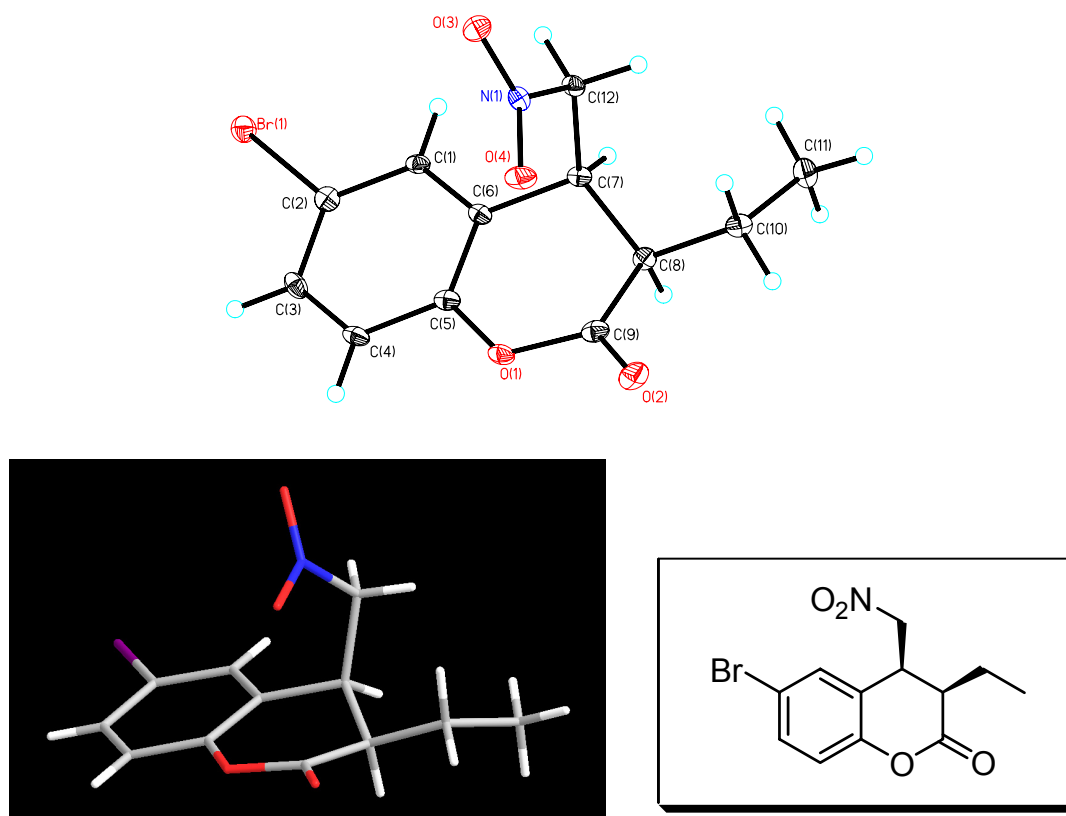

**Figure S1.** ORTEP and Stereo plots for X-ray crystal structures of (-)-*cis*-**3b**.

CCDC 794374 contains the supplementary crystallographic data for (-)-*cis*-**3b**. These data can be obtained free of charge from the Cambridge Crystallographic Data Centre via [www.ccdc.cam.ac.uk/data\\_request/cif](http://www.ccdc.cam.ac.uk/data_request/cif).

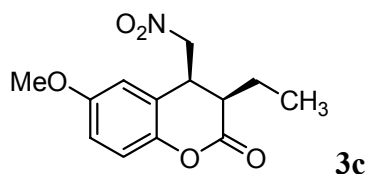

*cis*-**3c**: yellow solid; mp 85-87 °C,  $R_f = 0.36$  for *cis*-**3c** in 20% EtOAc-hexane,  $[\alpha]_D^{23} -45$  (c 1.6 CHCl<sub>3</sub>). IR (neat): 2964, 2929, 1764, 1555, 1379, 1208, 1034, 817 cm<sup>-1</sup>; <sup>1</sup>H NMR (CDCl<sub>3</sub>, 500 MHz):  $\delta$  7.00 (d,  $J = 8.9$  Hz, 1 H), 6.84 (dd,  $J = 8.9, 2.9$  Hz, 1 H), 6.65 (d,  $J = 2.9$  Hz, 1 H), 4.56 (dd,  $J = 12.5, 5.0$  Hz, 1 H), 4.28 (dd,  $J = 12.5, 10.5$  Hz, 1 H), 3.83 (dt,  $J = 10.5, 5.0$  Hz, 1 H), 3.75 (s, 3 H), 2.78-2.76 (m, 1 H), 2.13-2.02 (m, 1 H), 1.57-1.50 (m, 1 H), 1.12 (t,  $J = 7.5$  Hz, 3 H); <sup>13</sup>C NMR (CDCl<sub>3</sub>, 125 MHz):  $\delta$  169.0 (C), 156.3 (C), 144.6 (C), 123.5 (C), 118.2 (CH), 115.3 (CH), 113.0 (CH), 75.3 (CH<sub>2</sub>), 55.7 (CH<sub>3</sub>), 43.3 (CH), 37.5 (CH), 19.9 (CH<sub>2</sub>), 11.9 (CH<sub>3</sub>); MS ( $m/z$ , relative intensity): 265 (M<sup>+</sup>, 100), 218 (76), 204 (19), 189 (18), 175 (41), 161 (45), 149 (38), 121 (44), 91 (31), 77 (99), 55 (17); exact mass calculate for C<sub>13</sub>H<sub>15</sub>NO<sub>5</sub> (M<sup>+</sup>): 265.0950; found (M<sup>+</sup>): 265.0948.

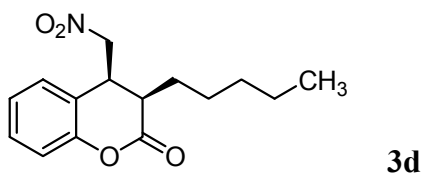

*cis*-**3d**: white solid; mp 67-69 °C,  $R_f = 0.50$  for *cis*-**3d** in 20% EtOAc-hexane,  $[\alpha]_D^{24} -85$  (c 1.5 CHCl<sub>3</sub>). IR (neat): 2957, 2929, 2860, 1769, 1556, 1377, 1102. 762 cm<sup>-1</sup>; <sup>1</sup>H NMR (CDCl<sub>3</sub>, 500 MHz):  $\delta$  7.34-7.31 (m, 1 H), 7.14-7.06 (m, 3 H), 4.58 (dd,  $J = 12.5, 5.0$  Hz, 1 H), 4.28 (dd,  $J = 12.5, 10.0$  Hz, 1 H), 3.85 (dt,  $J = 10.0, 5.0$  Hz, 1 H), 2.88 (dd,  $J = 12.5, 6.8$  Hz, 1 H), 2.04-2.00 (m, 1 H), 1.51-1.44 (m, 3 H), 1.43-1.34 (m, 4 H), 0.89 (t,  $J = 6.8$  Hz, 3 H); <sup>13</sup>C NMR (CDCl<sub>3</sub>, 125 MHz):  $\delta$  168.9 (C), 150.8 (C), 130.1 (CH), 128.0 (CH), 124.9 (CH), 122.6 (C), 117.3 (CH), 75.5 (CH<sub>2</sub>), 41.6 (CH), 37.6 (CH), 31.4 (CH<sub>2</sub>), 26.9 (CH<sub>2</sub>), 26.5 (CH<sub>2</sub>), 22.4 (CH<sub>2</sub>), 13.9 (CH<sub>3</sub>); MS ( $m/z$ , relative intensity): 277 (M<sup>+</sup>, 7), 161 (21), 160 (100), 131 (19), 107 (20), 91 (16), 77 (7), 55 (13); exact mass calculate for C<sub>15</sub>H<sub>19</sub>NO<sub>4</sub> (M<sup>+</sup>): 277.1314; found (M<sup>+</sup>): 277.1315.

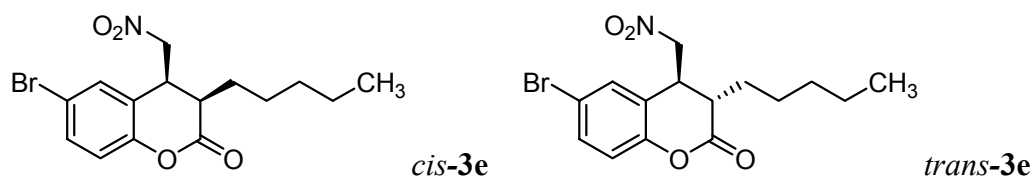

*cis*-**3e**: colorless oil;  $R_f = 0.65$  for *cis*-**3e** in 20% EtOAc-hexane,  $[\alpha]_D^{24} -31$  (c 1.75 CHCl<sub>3</sub>). IR (neat): 2956, 2927, 2859, 1773, 1556, 1377, 1105. 1072, 821 cm<sup>-1</sup>; <sup>1</sup>H NMR (CDCl<sub>3</sub>, 500 MHz):  $\delta$  7.45 (dd,  $J = 8.7, 2.2$  Hz, 1H), 7.30 (d,  $J = 2.2$  Hz, 1H), 6.97 (d,  $J = 8.7$  Hz, 1H), 4.57 (dd,  $J = 12.9, 5.0$  Hz, 1H), 4.28 (dd,  $J = 12.9, 10.2$  Hz, 1H), 3.82 (dt,  $J = 10.2, 5.0$  Hz, 1H), 2.84 (dd,  $J = 12.9, 6.8$  Hz, 1H), 2.02-2.00 (m, 1H), 1.55-1.42 (m, 3H), 1.33-1.32 (m, 4H), 0.89 (t,  $J = 6.8$  Hz, 3H); <sup>13</sup>C NMR (CDCl<sub>3</sub>, 125 MHz):  $\delta$  168.2 (C), 150.0 (C), 133.2 (CH), 130.9 (CH), 124.7 (C), 119.1 (CH), 117.5 (C), 75.0 (CH<sub>2</sub>), 41.4 (CH), 37.3 (CH), 31.4 (CH<sub>2</sub>), 26.9 (CH<sub>2</sub>), 26.5 (CH<sub>2</sub>), 22.4 (CH<sub>2</sub>), 13.9 (CH<sub>3</sub>); MS ( $m/z$ , relative intensity): 357 (M<sup>+</sup>+2, 31), 355 (M<sup>+</sup>, 32), 297 (7), 295 (13), 254 (18), 252 (18), 240 (99), 238 (100), 175(22), 161 (22), 149 (20), 118 (22), 105 (23), 97 (20), 91 (24), 85 (27), 71 (43) 57 (51) 55 (46); exact mass calculate for C<sub>15</sub>H<sub>18</sub>BrNO<sub>4</sub> (M<sup>+</sup>): 355.0419; found (M<sup>+</sup>): 355.0416.

*trans*-**3e**: colorless oil;  $R_f = 0.60$  for *trans*-**3e** in 20% EtOAc-hexane,  $[\alpha]_D^{24} -76.6$  (c 1.5 CHCl<sub>3</sub>). IR (neat): 2956, 2927, 2859, 1773, 1556, 1377, 1105. 1072, 821 cm<sup>-1</sup>; <sup>1</sup>H NMR (CDCl<sub>3</sub>, 500 MHz):  $\delta$  7.46 (dd,  $J = 8.7, 2.2$  Hz, 1 H), 7.37 (d,  $J = 2.2$  Hz, 1 H), 6.97 (d,  $J = 8.7$  Hz, 1 H), 4.56-4.43 (m, 2 H), 3.67 (t,  $J = 7.2$  Hz, 1 H), 2.87-2.83 (m, 1 H), 1.54-1.33 (m, 4 H), 1.28-1.20 (m, 4 H), 0.89 (t,  $J = 6.9$  Hz, 3 H); <sup>13</sup>C NMR (CDCl<sub>3</sub>, 125 MHz):  $\delta$  167.4 (C), 149.9 (C), 133.3 (CH), 131.9 (CH), 120.9 (C), 119.0 (CH), 117.8 (C), 76.7 (CH<sub>2</sub>), 42.4 (CH), 39.2 (CH), 31.0 (CH<sub>2</sub>), 30.1 (CH<sub>2</sub>), 26.4 (CH<sub>2</sub>), 22.3 (CH<sub>2</sub>), 13.9 (CH<sub>3</sub>).

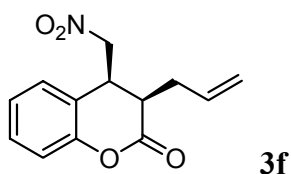

*cis*-**3f**: white solid; mp 96-98 °C,  $R_f = 0.36$  for *cis*-**3f** in 20% EtOAc-hexane,  $[\alpha]_D^{23} -35$  (c 1.0 CHCl<sub>3</sub>). IR (neat): 2962, 2925, 1769, 1555, 1379, 1119, 1099. 925, 798 cm<sup>-1</sup>; <sup>1</sup>H NMR (CDCl<sub>3</sub>, 500 MHz):  $\delta$  7.33 (td,  $J = 8.1, 1.8$  Hz, 1 H), 7.15-7.09 (m, 3 H), 5.85 (dddd,  $J = 17.0, 10.1, 8.8, 5.0$ , Hz, 1 H), 5.26 (s, 1H), 5.24-5.22 (m, 1 H), 4.62 (dd,  $J = 12.4, 4.6$  Hz, 1 H), 4.28 (dd,  $J = 12.4, 10.6$  Hz, 1 H), 3.85 (dt,  $J = 10.6, 5.0$  Hz, 1 H), 3.02 (dt,  $J = 9.0, 5.0$  Hz, 1 H), 2.88 (ddd,  $J = 10.1, 8.8, 4.6$  Hz, 1 H), 2.26 (dt,  $J = 17.0, 9.0$  Hz, 1 H); <sup>13</sup>C NMR (CDCl<sub>3</sub>, 125 MHz):  $\delta$  168.3 (C), 150.8 (C), 133.3 (CH), 130.2 (CH), 128.2 (CH), 125.0 (CH), 122.4 (C), 119.0 (CH<sub>2</sub>), 117.4 (CH), 75.1 (CH<sub>2</sub>), 41.3 (CH), 36.8 (CH), 30.8 (CH<sub>2</sub>); MS ( $m/z$ , relative intensity): 247 (M<sup>+</sup>, 6), 217 (42), 200 (90), 199 (28), 186 (32), 185 (55), 172 (34), 144 (41), 131 (100), 107 (52), 77 (29); exact mass calculate for C<sub>13</sub>H<sub>13</sub>NO<sub>4</sub> (M<sup>+</sup>): 247.0845; found (M<sup>+</sup>): 247.0845.

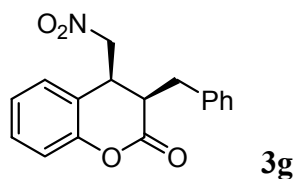

*cis*-**3g**: colorless oil;  $R_f = 0.53$  for *cis*-**3g** in 20% EtOAc-hexane,  $[\alpha]_D^{23} -51$  (c 2.8 CHCl<sub>3</sub>); IR (neat): 2961, 2925, 1766, 1555, 1377, 1017, 797 cm<sup>-1</sup>; <sup>1</sup>H NMR (CDCl<sub>3</sub>, 500 MHz):  $\delta$  7.37-7.27 (m, 4 H), 7.23-7.03 (m, 5 H), 4.72 (dd,  $J = 12.4, 4.4$ , Hz, 1 H), 4.35 (dd,  $J = 12.4, 10.6$  Hz, 1 H), 3.66-3.61 (m, 1 H), 3.52 (dd,  $J = 14.7, 5.7$  Hz, 1 H), 3.26 (dt,  $J = 10.6, 4.4$  Hz, 1 H), 2.75 (dd,  $J = 14.7, 5.7$  Hz, 1 H); <sup>13</sup>C NMR (CDCl<sub>3</sub>, 125 MHz):  $\delta$  168.4 (C), 150.8 (C), 136.9 (C), 130.2 (CH), 129.1 (2 CH), 128.6 (2 CH), 128.2 (CH), 127.3 (CH), 125.0 (CH), 122.6 (C), 117.4 (CH), 75.3 (CH<sub>2</sub>), 43.5 (CH), 36.6 (CH), 32.4 (CH<sub>2</sub>); MS ( $m/z$ , relative intensity): 297 (M<sup>+</sup>, 9), 250 (18), 161 (23), 131 (41), 107 (12), 91 (100), 71 (19), 57 (24); exact mass calculate for C<sub>17</sub>H<sub>15</sub>NO<sub>4</sub> (M<sup>+</sup>): 297.1001; found (M<sup>+</sup>): 297.1001.

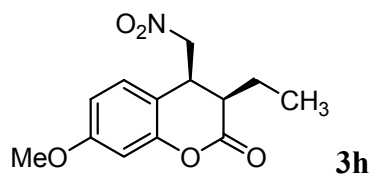

*cis*-**3h**: white solid;  $R_f = 0.30$  for *cis*-**3h** in 20% EtOAc-hexane,  $[\alpha]_D^{23} -81.9$  (c 2.0 CHCl<sub>3</sub>); IR (neat): 2956, 2862, 1769, 1588, 1376, 1103, 1010, 762 cm<sup>-1</sup>; <sup>1</sup>H NMR (CDCl<sub>3</sub>, 500 MHz):  $\delta$  7.03 (d,  $J = 8.3$  Hz, 1 H), 6.63 (d,  $J = 2.5$  Hz, 1 H), 6.61 (dd,  $J = 8.3, 2.5$  Hz, 1 H), 4.54 (dd,  $J = 12.3, 5.1$  Hz, 1 H), 4.23 (dd,  $J = 12.3, 10.6$  Hz, 1 H), 3.83 (dt,  $J = 10.6, 5.1$  Hz, 1 H), 3.77 (s, 3 H), 2.80 (td,  $J = 7.3, 5.1$  Hz, 1 H), 2.10-2.05 (m, 1 H), 1.55-1.50 (m, 1 H), 1.12 (t,  $J = 7.5$  Hz, 3 H); <sup>13</sup>C NMR (CDCl<sub>3</sub>, 125 MHz):  $\delta$  169.1 (C), 161.2 (C), 152.0 (C), 129.0 (CH), 114.6 (C), 111.0 (CH), 103.2 (CH), 76.0 (CH<sub>2</sub>), 55.8 (CH<sub>3</sub>), 43.8 (CH), 37.1 (CH), 20.3 (CH<sub>2</sub>), 12.2 (CH<sub>3</sub>); MS ( $m/z$ , relative intensity): 265 (M<sup>+</sup>, 32), 218 (44), 205 (33), 203 (40), 190 (100), 175 (22), 162 (17), 139 (19), 121 (26), 91 (21); exact mass calculate for C<sub>13</sub>H<sub>15</sub>NO<sub>5</sub> (M<sup>+</sup>): 265.0950; found (M<sup>+</sup>): 265.0951.

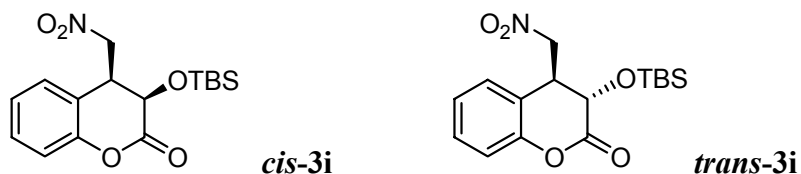

**cis-3i**: white solid; mp 138-140 °C,  $R_f = 0.46$  for **cis-3i** in 10% EtOAc-hexane,  $[\alpha]_D^{24} -57$  (c 1.0 CHCl<sub>3</sub>); IR (neat): 2953, 2929, 2857, 1789, 1558, 1145, 1092, 840 cm<sup>-1</sup>; <sup>1</sup>H NMR (CDCl<sub>3</sub>, 500 MHz):  $\delta$  7.35 (td,  $J = 8.2, 1.5$  Hz, 1 H), 7.21 (dd,  $J = 7.5, 1.5$  Hz, 1 H), 7.14 (td,  $J = 7.5, 1.5$  Hz, 1 H), 7.07 (d,  $J = 8.2$  Hz, 1 H), 4.83 (dd,  $J = 13.1, 5.3$  Hz, 1 H), 4.70 (d,  $J = 5.3$  Hz, 1 H), 4.33 (dd,  $J = 13.1, 5.3$  Hz, 1 H), 4.01-3.98 (m, 1 H), 0.92 (s, 9 H), 0.22 (s, 3 H), 0.12 (s, 3 H); <sup>13</sup>C NMR (CDCl<sub>3</sub>, 125 MHz):  $\delta$  167.1 (C), 150.2 (C), 130.5 (CH), 129.0 (CH), 125.3 (CH), 120.2 (C), 117.4 (CH), 75.1 (CH<sub>2</sub>), 68.2 (CH), 41.8 (CH), 25.6 (3 CH<sub>3</sub>), 18.3 (C), -4.9 (CH<sub>3</sub>), -5.8 (CH<sub>3</sub>); MS ( $m/z$ , relative intensity): 337 (M<sup>+</sup>, 2), 280 (24), 131 (13), 113 (13), 111 (10), 107 (25), 99 (19), 97 (21), 99 (19), 97 (21), 91 (15), 85 (57), 83 (24), 71 (77), 57 (100), 55 (23); exact mass calculate for C<sub>16</sub>H<sub>23</sub>NO<sub>5</sub>Si (M<sup>+</sup>): 337.1345; found (M<sup>+</sup>): 337.1348.

**trans-3i**: colorless oil;  $R_f = 0.34$  for **trans-3i** in 10% EtOAc-hexane,  $[\alpha]_D^{24} -38$  (c 1.0 CHCl<sub>3</sub>). IR (neat): 2953, 2929, 2857, 1789, 1558, 1145, 1092, 840 cm<sup>-1</sup>; <sup>1</sup>H NMR (CDCl<sub>3</sub>, 500 MHz):  $\delta$  7.32 (td,  $J = 8.4, 4.3$  Hz, 1 H), 7.15 (d,  $J = 4.3$  Hz, 2 H), 7.09 (d,  $J = 8.4$  Hz, 1 H), 4.86 (dt,  $J = 10.4, 5.4$  Hz, 2 H), 4.59 (d,  $J = 10.4$  Hz, 1 H), 3.84 (dt,  $J = 10.4, 5.4$  Hz, 1 H), 0.87 (s, 9 H), 0.21 (s, 3 H), 0.10 (s, 3 H); <sup>13</sup>C NMR (CDCl<sub>3</sub>, 125 MHz):  $\delta$  167.2 (C), 150.2 (C), 129.8 (CH), 125.9 (CH), 125.2 (CH), 120.2 (C), 117.3 (CH), 72.6 (CH<sub>2</sub>), 68.0 (CH), 41.1 (CH), 25.6 (3 CH<sub>3</sub>), 18.2 (C), -4.6 (CH<sub>3</sub>), -5.6 (CH<sub>3</sub>).

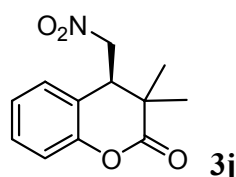

**3j**: yellow solid; mp 61-63 °C,  $R_f = 0.30$  for **3j** in 20% EtOAc-hexane,  $[\alpha]_D^{23} -109$  (c 1.3 CHCl<sub>3</sub>); IR (neat): 2981, 2928, 1765, 1554, 1379, 1123, 1096, 763 cm<sup>-1</sup>; <sup>1</sup>H NMR (CDCl<sub>3</sub>, 500 MHz):  $\delta$  7.33 (ddd,  $J = 8.0, 6.4, 2.7$  Hz, 1 H), 7.13-7.11 (m, 2 H), 7.06 (d,  $J = 8.0$  Hz, 1 H), 4.71 (dd,  $J = 12.5, 5.2$  Hz, 1 H), 4.31 (dd,  $J = 12.5, 9.7$  Hz, 1 H), 3.49 (dd,  $J = 9.7, 5.2$  Hz, 1 H), 1.41 (s, 3 H), 1.24 (s, 3 H); <sup>13</sup>C NMR (CDCl<sub>3</sub>, 125 MHz):  $\delta$  171.5 (C), 150.5 (C), 130.1 (CH), 128.7 (CH), 125.2 (CH), 121.0 (C), 116.9 (CH), 77.0 (CH<sub>2</sub>), 45.7 (CH), 39.8 (C), 25.5 (CH<sub>3</sub>), 21.7 (CH<sub>3</sub>); MS ( $m/z$ , relative intensity): 235 (M, 19), 188 (88), 160 (36), 145 (100), 107 (17), 91 (37), 65 (11); exact mass calculate for C<sub>12</sub>H<sub>13</sub>NO<sub>4</sub> (M<sup>+</sup>): 235.0845; found (M<sup>+</sup>): 235.0842.



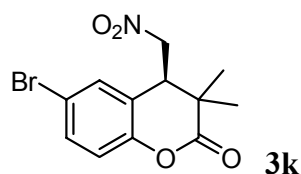

**3k**: white solid; mp 111-113 °C,  $R_f = 0.25$  for **3k** in 20% EtOAc-hexane,  $[\alpha]_D^{24} -29$  (c 1.3 CHCl<sub>3</sub>); IR (neat): 2962, 1768, 1554, 1478, 1328, 1177. 1097, 814 cm<sup>-1</sup>; <sup>1</sup>H NMR (CDCl<sub>3</sub>, 500 MHz):  $\delta$  7.44 (dd,  $J = 8.7, 2.3$  Hz, 1 H), 7.28 (d, 2.3 Hz, 1 H), 6.95 (d,  $J = 8.7$  Hz, 1 H), 4.69 (dd,  $J = 12.9, 5.2$  Hz, 1 H), 4.32 (dd,  $J = 12.9, 9.3$  Hz, 1 H), 3.46 (dd,  $J = 9.3, 5.2$  Hz, 1 H), 1.40 (s, 3 H), 1.24 (s, 3 H), <sup>13</sup>C NMR (CDCl<sub>3</sub>, 125 MHz):  $\delta$  170.7 (C), 149.7 (C), 133.1 (CH), 131.5 (CH), 123.1 (C), 118.7 (CH), 117.6 (C), 76.5 (CH<sub>2</sub>), 45.3 (CH), 39.6 (C), 25.5 (CH<sub>3</sub>), 21.6 (CH<sub>3</sub>); MS ( $m/z$ , relative intensity): 315 (M<sup>+</sup>+3, 59), 313 (M<sup>+</sup>+1, 59), 268 (98), 266 (100), 240 (56), 238 (58), 225 (93), 223 (90), 160 (96), 145 (64), 70 (53); exact mass calculate for C<sub>12</sub>H<sub>12</sub>BrNO<sub>4</sub> (M<sup>+</sup>): 312.9950; found (M<sup>+</sup>): 312.9948.

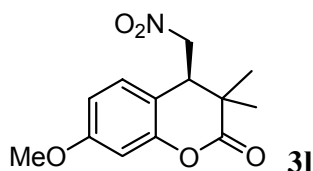

**3l**: colorless oil;  $R_f = 0.36$  for **3k** in 20% EtOAc-hexane,  $[\alpha]_D^{23} -92$  (c 1.5 CHCl<sub>3</sub>); IR (neat): 2961, 1765, 1555, 1435, 1383, 1158. 1029, 809 cm<sup>-1</sup>; <sup>1</sup>H NMR (CDCl<sub>3</sub>, 500 MHz):  $\delta$  7.00 (d,  $J = 8.4$  Hz, 1 H), 6.64 (dd, 8.4, 2.5 Hz, 1 H), 6.59 (d,  $J = 2.5$  Hz, 1 H), 4.68 (dd,  $J = 12.4, 5.2$  Hz, 1 H), 4.27 (dd,  $J = 12.4, 9.8$  Hz, 1 H), 3.77 (s, 3 H), 3.42 (dd,  $J = 9.8, 5.2$  Hz, 1 H), 1.39 (s, 3 H), 1.24 (s, 3 H), <sup>13</sup>C NMR (CDCl<sub>3</sub>, 100 MHz):  $\delta$  171.6 (C), 160.9 (C), 151.4 (C), 129.4 (CH), 112.7 (C), 110.9 (CH), 102.5 (CH), 76.7 (CH<sub>2</sub>), 55.5 (CH<sub>3</sub>), 45.2 (CH), 39.9 (C), 25.6 (CH<sub>3</sub>), 21.8 (CH<sub>3</sub>); MS ( $m/z$ , relative intensity): 265 (M<sup>+</sup>, 50), 218 (100), 205 (38), 191 (26), 175 (94), 150 (31), 137 (28), 121 (29), 91 (23), 83 (40), 70 (33); exact mass calculate for C<sub>13</sub>H<sub>15</sub>NO<sub>5</sub> (M<sup>+</sup>): 265.0950; found (M<sup>+</sup>): 265.0950.

**Representative procedure for the preparation of compound 3a on water (Table 2, entry 13).**

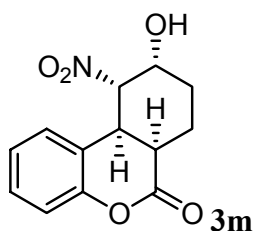

To a solution of *trans*-2-hydroxy- $\beta$ -nitrostyrene (**1a**, 50 mg, 0.3 mmol), catalyst **I** (20 mg, 0.06 mmol) and acetic acid (4 mg, 0.06 mmol) in H<sub>2</sub>O (0.5 mL) was added a solution of glutaraldehyde (61 mg, 0.60 mmol). The resulting solution was stirred at 30 °C for 24 h until the completion of reaction, monitored by TLC. The resulting mixture was extracted with EtOAc (20 mL), washed with brine (5 mL), dried over Na<sub>2</sub>SO<sub>4</sub>, and concentrated *in vacuo* to give the crude product. The residue was purified by flash column chromatography with 28% EtOAc-hexane ( $R_f$  = 0.25 for the hemiacetal, in 30% EtOAc-hexane) to give the hemiacetal as a colorless oil (40 mg, 50% yield). A solution of the hemiacetal (25 mg, 0.09 mmol) in CH<sub>2</sub>Cl<sub>2</sub> (4 mL) and PCC (61 mg, 0.28 mmol) was stirred at ambient temperature for 12 h until the completion of reaction, monitored by TLC. The reaction mixture was diluted with EtOAc (25 mL), and filtered through Celite. The filtrate was concentrated *in vacuo* to give the crude product. The residue was purified by flash column chromatography with 22% EtOAc-hexane ( $R_f$  = 0.35 for **3m** in 30% EtOAc-hexane) to give **3m** as a white solid (18 mg, 76% yield).

**3m**: white solid; mp 197-199 °C,  $R_f$  = 0.35 for **3m** in 30% EtOAc-hexane,  $[\alpha]_D^{23}$  -114 (c 0.2 CHCl<sub>3</sub>); IR (neat): 3231, 2921, 2857, 1747, 1541, 1373, 1010, 764 cm<sup>-1</sup>; <sup>1</sup>H NMR (acetone-d<sub>6</sub>, 500 MHz):  $\delta$  7.38-7.33 (m, 2 H), 7.13 (td,  $J$  = 8.1, 1.2 Hz, 1 H), 7.04 (dd,  $J$  = 8.1, 1.2 Hz, 1 H), 4.79 (d,  $J$  = 4.2, Hz, 1 H), 4.70 (dd,  $J$  = 12.2, 2.6 Hz, 1 H), 4.55 (s, 1 H), 4.11 (dd,  $J$  = 12.2, 6.0 Hz, 1 H), 3.36-3.33 (m, 1 H), 2.19-2.14 (m, 2 H), 1.97-1.93 (m, 2 H); <sup>13</sup>C NMR (acetone-d<sub>6</sub>, 125 MHz):  $\delta$  169.3 (C), 152.7 (C), 131.1 (CH), 130.4 (CH), 125.1 (CH), 124.0 (C), 117.6 (CH), 90.1 (CH), 68.6 (CH), 39.4 (CH), 34.9 (CH), 29.2 (CH<sub>2</sub>), 18.9 (CH<sub>2</sub>); MS ( $m/z$ , relative intensity): 263 (M<sup>+</sup>, 41), 216 (100), 197 (31), 188 (43), 171 (29), 160 (33), 147 (43), 131 (30), 111 (27), 97 (38), 91 (26), 77 (24), 71 (41); exact mass calculate for C<sub>13</sub>H<sub>13</sub>NO<sub>5</sub> (M<sup>+</sup>): 263.0794; found (M<sup>+</sup>): 263.0797.

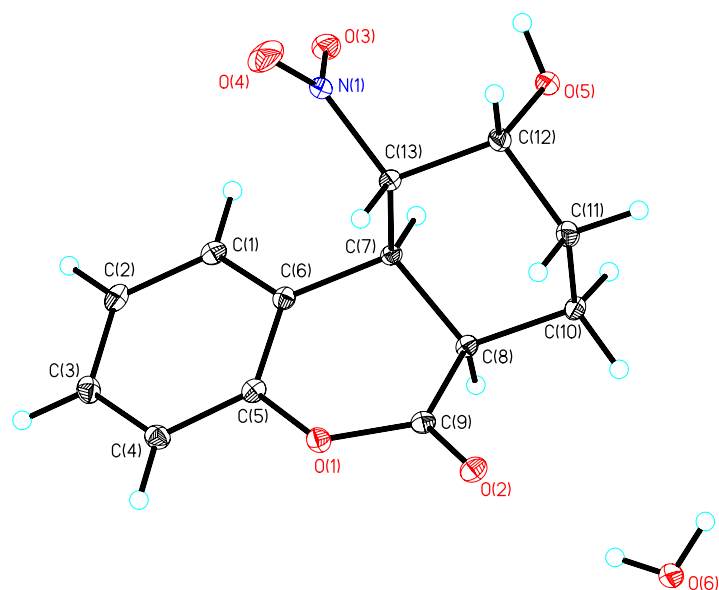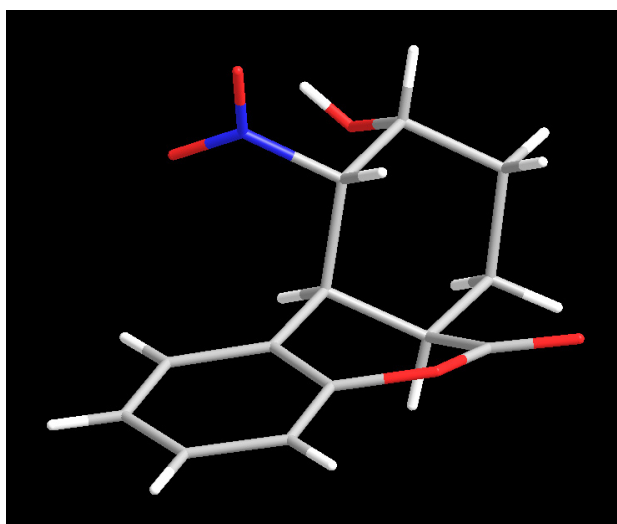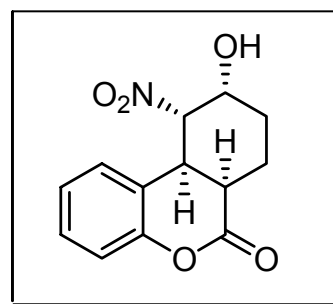

**Figure S1.** ORTEP and Stereo plots for X-ray crystal structures of (-)-**3m**·H<sub>2</sub>O

CCDC 794375 contains the supplementary crystallographic data for (-)-**3m**·H<sub>2</sub>O. These data can be obtained free of charge from the Cambridge Crystallographic Data Centre via [www.ccdc.cam.ac.uk/data\\_request/cif](http://www.ccdc.cam.ac.uk/data_request/cif).

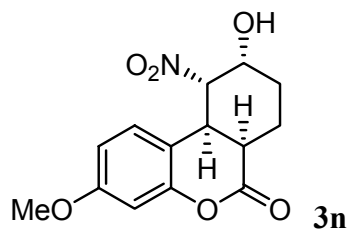

**3n**: white solid; mp 191-193 °C,  $R_f = 0.31$  for **3n** in 30% EtOAc-hexane,  $[\alpha]_D^{23} -100$  (c 0.25 CHCl<sub>3</sub>); IR (neat): 3228, 2955, 2909, 1759, 1546, 1373, 1199, 1021, 804 cm<sup>-1</sup>; <sup>1</sup>H NMR (acetone-d<sub>6</sub>, 500 MHz):  $\delta$  7.25 (d,  $J = 8.5$  Hz, 1 H), 6.70 (dd,  $J = 8.5, 2.6$  Hz, 1 H), 6.0 (d,  $J = 2.6$  Hz, 1 H), 4.75 (d,  $J = 4.1$ , Hz, 1 H), 4.64 (dd,  $J = 12.1, 2.6$  Hz, 1 H), 4.53 (s, 1 H), 4.04 (dd,  $J = 12.1, 6.0$  Hz, 1 H), 3.80 (s, 3 H), 3.33-3.30 (m, 1 H), 2.17-2.12 (m, 2 H), 2.04-1.91 (m, 2 H); <sup>13</sup>C NMR (acetone-d<sub>6</sub>, 125 MHz):  $\delta$  169.3 (C), 161.5 (C), 153.5 (C), 131.7 (CH), 115.7 (C), 111.0 (CH), 103.0 (CH), 90.5 (CH), 68.7 (CH), 55.9 (CH<sub>3</sub>), 39.6 (CH), 34.3 (CH), 29.2 (CH<sub>2</sub>), 18.8 (CH<sub>2</sub>); MS ( $m/z$ , relative intensity): 293 (M<sup>+</sup>, 56), 246 (100), 229 (36), 218 (100), 189 (48), 177 (29), 161 (30), 91 (13), 77 (18), 55 (16); exact mass calculate for C<sub>14</sub>H<sub>15</sub>NO<sub>6</sub> (M<sup>+</sup>): 293.0899; found (M<sup>+</sup>): 293.0901.

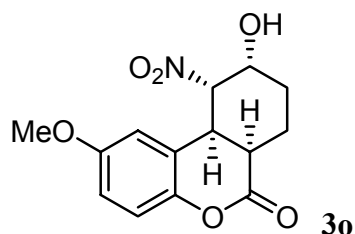

**3o**: white solid; mp 159-161 °C,  $R_f = 0.29$  for **3o** in 30% EtOAc-hexane,  $[\alpha]_D^{23} -86$  (c 0.22 CHCl<sub>3</sub>); IR (neat): 3227, 2955, 2909, 1759, 1546, 1339, 1152, 1021, 804 cm<sup>-1</sup>; <sup>1</sup>H NMR (acetone-d<sub>6</sub>, 500 MHz):  $\delta$  6.99-6.97 (m, 1 H), 6.92-6.89 (m, 2 H), 4.82 (d,  $J = 4.4$ , Hz, 1 H), 4.69 (dd,  $J = 12.2, 2.6$  Hz, 1 H), 4.55 (s, 1 H), 4.06 (dd,  $J = 12.2, 6.0$  Hz, 1 H), 3.78 (s, 3 H), 3.32-3.29 (m, 1 H), 2.17-2.12 (m, 2 H), 1.94-1.91 (m, 2 H); <sup>13</sup>C NMR (acetone-d<sub>6</sub>, 125 MHz):  $\delta$  169.4 (C), 156.9 (C), 146.4 (C), 124.9 (C), 118.4 (CH), 116.1 (CH), 115.3 (CH), 90.1 (CH), 68.6 (CH), 55.9 (CH<sub>3</sub>), 39.3 (CH), 35.2 (CH), 29.2 (CH<sub>2</sub>), 18.9 (CH<sub>2</sub>); MS ( $m/z$ , relative intensity): 293 (M<sup>+</sup>, 100), 246 (55), 229 (18), 227 (60), 189 (19), 174 (26), 161 (44), 105 (54), 91 (62), 77 (28), 57 (87), 55 (62); exact mass calculate for C<sub>14</sub>H<sub>15</sub>NO<sub>6</sub> (M<sup>+</sup>): 293.0899; found (M<sup>+</sup>): 293.0901.

Fig S13. 1H NMR (CDCl3, 500 MHz) of compound cis-3a

PMK-02-3450 Supplementary Material (ESI) for Organic & Biomolecular Chemistry  
 # This journal is (c) The Royal Society of Chemistry 2010  
 exp24 s2pul

| SAMPLE      |            | DEC. & VT  |          |
|-------------|------------|------------|----------|
| date        | Mar 8 2010 | dfrq       | 125.693  |
| solvent     | cdc13      | dn         | C13      |
| file        | exp        | dpwr       | 30       |
| ACQUISITION |            |            |          |
| sfrq        | 499.830    | dm         | nnn      |
| tn          | H1         | dmm        | c        |
| at          | 3.000      | dmf        | 200      |
| np          | 48000      | dseq       |          |
| sw          | 8000.0     | dres       | 1.0      |
| fb          | not used   | homo       | n        |
| bs          | 4          | PROCESSING |          |
| tpwr        | 58         | wffile     |          |
| pw          | 4.8        | proc       | ft       |
| d1          | 1.000      | fn         | not used |
| tof         | 499.7      | math       | f        |
| nt          | 4          |            |          |
| ct          | 4          | werr       | react    |
| alock       | y          | wexp       | procplot |
| gain        | not used   | wbs        |          |
|             | FLAGS      | wnt        | wft      |
| il          | n          |            |          |
| in          | n          |            |          |
| dp          | y          |            |          |
| hs          | nn         |            |          |
| DISPLAY     |            |            |          |
| sp          | -250.1     |            |          |
| wp          | 4998.0     |            |          |
| vs          | 57         |            |          |
| sc          | 0          |            |          |
| wc          | 210        |            |          |
| hzmm        | 23.80      |            |          |
| is          | 70.52      |            |          |
| rfl         | 4638.9     |            |          |
| rfp         | 3618.7     |            |          |
| th          | 3          |            |          |
| ins         | 100.000    |            |          |
| nm          | ph         |            |          |

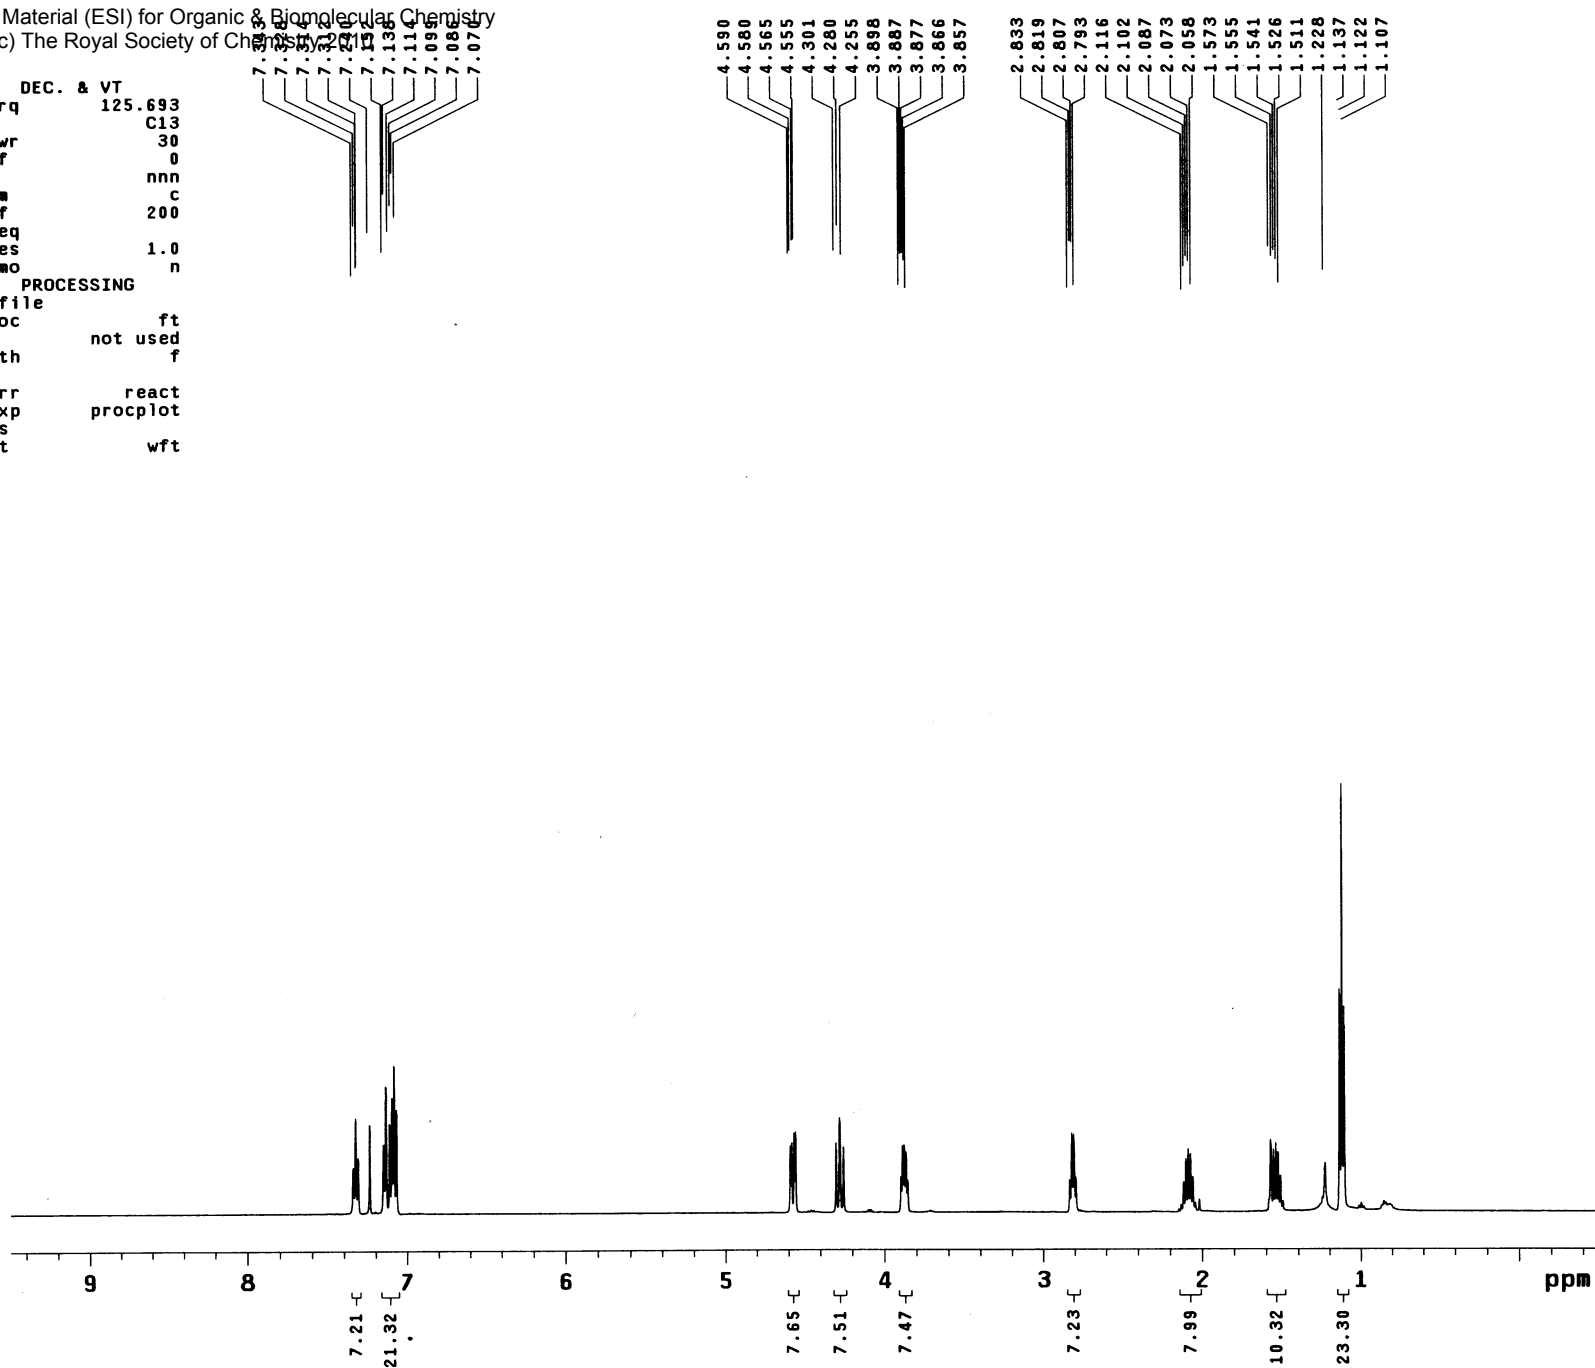

Fig S14. <sup>13</sup>C NMR (CDCl<sub>3</sub>, 125 MHz) of compound cis-3a

PMK-02-334-F1  
 # Supplementary Material (ESI) for Organic & Biomolecular Chemistry  
 # This journal is (c) The Royal Society of Chemistry 2010  
 exp23 s2pu1

|             |            |            |          |
|-------------|------------|------------|----------|
| SAMPLE      |            | DEC. & VT  |          |
| date        | Mar 8 2010 | dfrq       | 499.829  |
| solvent     | cdcl3      | dn         | H1       |
| file        | exp        | dpwr       | 39       |
| ACQUISITION |            | do         | 0        |
| sfrq        | 125.696    | dm         | yyv      |
| tn          | C13        | dsm        | w        |
| at          | 1.000      | daf        | 11905    |
| np          | 62894      | dseq       |          |
| sw          | 31446.5    | dres       | 1.0      |
| fb          | not used   | homo       | n        |
| bs          | 16         | PROCESSING |          |
| ss          | 2          | lb         | 1.00     |
| tpwr        | 54         | wtfile     |          |
| pw          | 4.0        | proc       | ft       |
| d1          | 1.000      | fn         | not used |
| tof         | 2512.2     | math       | f        |
| nt          | 5000       |            |          |
| ct          | 5000       | werr       | react    |
| alock       | not used   | wexp       | procplot |
| gain        | not used   | wbs        | testsn   |
| FLAGS       |            | wnt        |          |
| il          | n          |            |          |
| in          | n          |            |          |
| dp          | y          |            |          |
| hs          | nn         |            |          |
| DISPLAY     |            |            |          |
| sp          | -1257.0    |            |          |
| wp          | 27649.1    |            |          |
| vs          | 50         |            |          |
| sc          | 0          |            |          |
| wc          | 210        |            |          |
| hzmm        | 131.67     |            |          |
| is          | 500.00     |            |          |
| rfl         | 10984.4    |            |          |
| rfp         | 9677.5     |            |          |
| th          | 4          |            |          |
| ins         | 100.000    |            |          |
| nm          | ph         |            |          |

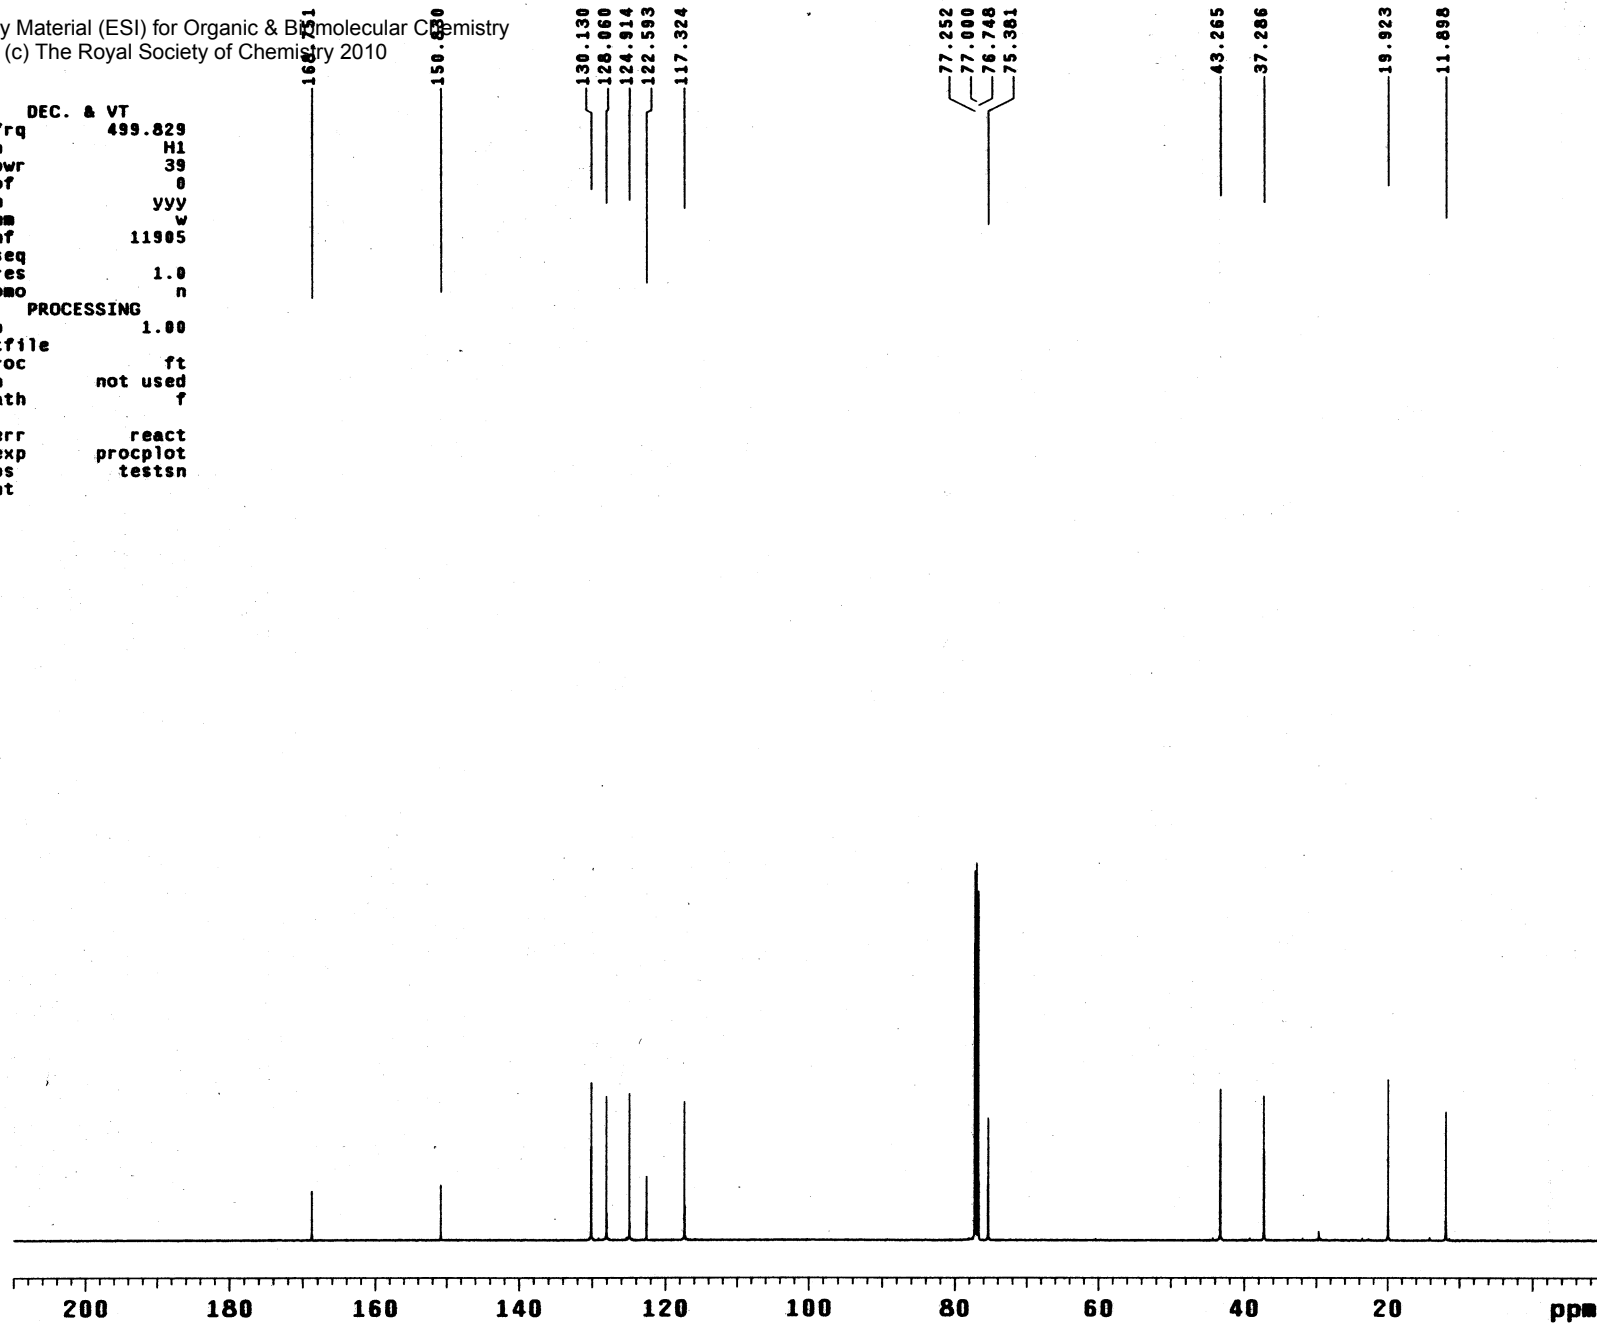

# Fig S15. DEPT of compound cis-3a

PMK-02-334-F1

# Supplementary Material (ESI) for Organic & Biomolecular Chemistry

exp25 DEPT

# This journal is (c) The Royal Society of Chemistry 2010

| SAMPLE      |            | DEPT          | ACQUISITION ARRAYS |      |
|-------------|------------|---------------|--------------------|------|
| date        | Mar 8 2010 | j1xh 140.0    | array              | mult |
| solvent     | cdcl3      | mult          | arraydim           | 3    |
| sample      | undefined  | SPECIAL       |                    |      |
| ACQUISITION |            | temp not used | f                  | mult |
| sw          | 31446.5    | gain 24       | 1                  | 0.5  |
| at          | 1.000      | spin 0        | 2                  | 1    |
| np          | 62894      | PROCESSING    | 3                  | 1.5  |
| bs          | 16         | lb 1.00       |                    |      |
| ss          | -4         | fn not used   |                    |      |
| d1          | 1.000      | SPECTRUM      |                    |      |
| nt          | 384        | wp 27649.1    |                    |      |
| ct          | 384        | sp -1257.4    |                    |      |
| TRANSMITTER |            | rp 131.0      |                    |      |
| tn          | C13        | lp 188.7      |                    |      |
| tof         | 2512.2     | ai cdc ph     |                    |      |
| tpwr        | 54         | REFERENCE     |                    |      |
| pw          | 11.500     | rfl 1269.9    |                    |      |
| DECOUPLER   |            | rpf 0         |                    |      |
| dn          | H1         | PLOT          |                    |      |
| doF         | 0          | wc 210        |                    |      |
| dpwr        | 39         | sc 0          |                    |      |
| dm          | nny        | vs 77         |                    |      |
| dmm         | ccw        | hzmm 131.67   |                    |      |
| dmf         | 11905      | th 68         |                    |      |
| pp1v1       | 51         |               |                    |      |
| pp          | 25.600     |               |                    |      |

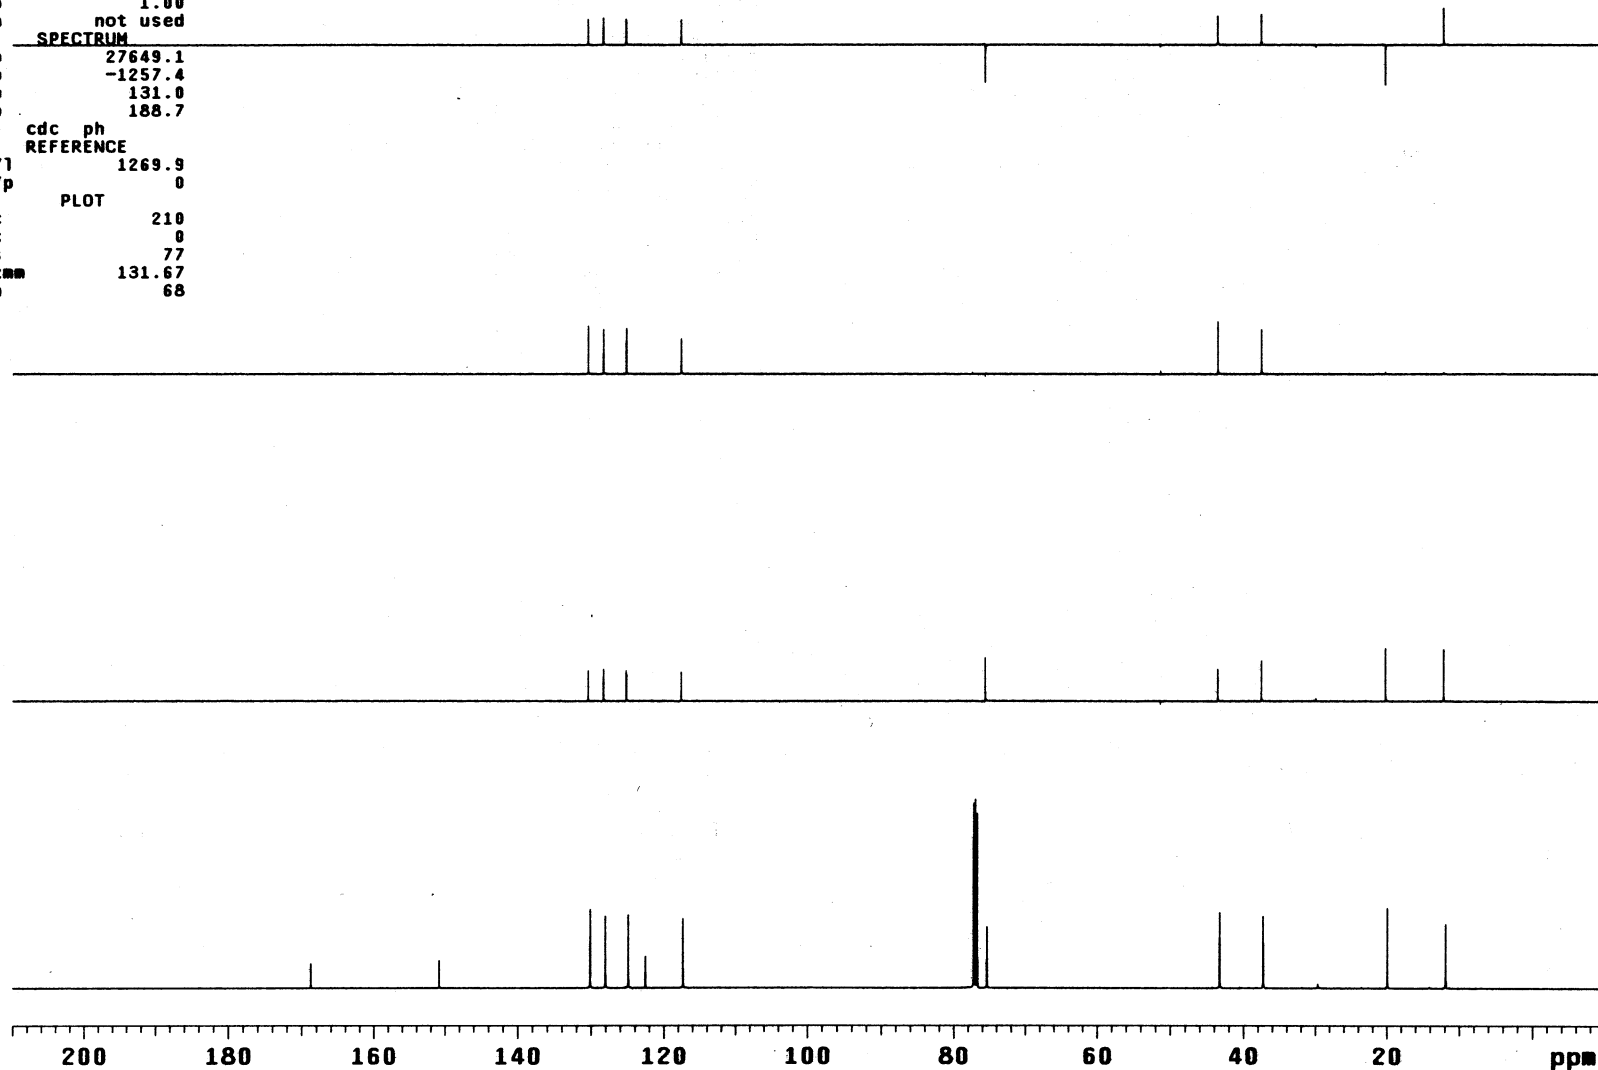

Fig S16. HSQC of compound cis-3a

exp27 ghsqc Supplementary Material (ESI) for Organic & Biomolecular Chemistry

This journal is (c) The Royal Society of Chemistry 2010

|                |            |               |          |          |       |
|----------------|------------|---------------|----------|----------|-------|
| date           | Mar 8 2010 | hs            | n        | array    | phase |
| solvent        | cdc13      | sspul         | y        | arraydim | 256   |
| sample         | undefined  | PFGflg        | y        |          |       |
| ACQUISITION    |            | hsglv1        | 1003     | i        | phase |
| sw             | 5006.3     | SPECIAL       |          | 1        | 1     |
| at             | 0.205      | temp          | not used | 2        | 2     |
| np             | 2048       | gain          | 24       |          |       |
| fb             | not used   | spin          | 0        |          |       |
| ss             | 32         | GRADIENTS     |          |          |       |
| d1             | 1.000      | gzlv11        | 1003     |          |       |
| nt             | 16         | gt1           | 0.002000 |          |       |
| 2D ACQUISITION |            | gzlv13        | 505      |          |       |
| sw1            | 21367.5    | gt3           | 0.001000 |          |       |
| ni             | 128        | gstab         | 0.000500 |          |       |
| phase          | arrayed    | F2 PROCESSING |          |          |       |
| TRANSMITTER    |            | gf            | 0.094    |          |       |
| tn             | H1         | gfs           | not used |          |       |
| sfrq           | 499.829    | fn            | 2048     |          |       |
| tof            | -499.9     | F1 PROCESSING |          |          |       |
| tpwr           | 58         | gf1           | 0.006    |          |       |
| pw             | 11.100     | gfs1          | not used |          |       |
| DECOUPLER      |            | proc1         | 1p       |          |       |
| dn             | C13        | fn1           | 2048     |          |       |
| dof            | -2515.2    | DISPLAY       |          |          |       |
| dm             | nny        | sp            | 104.2    |          |       |
| dmm            | ccp        | wp            | 3803.6   |          |       |
| dmf            | 32258      | sp1           | 806.5    |          |       |
| dpwr           | 36         | wpl           | 16213.4  |          |       |
| pxlv1          | 52         | rfl           | 2660.9   |          |       |
| pxw            | 14.300     | rfp           | 2139.3   |          |       |
| j1xh           | HSQC       | rfl1          | 10775.1  |          |       |
| nullflg        | 140.0      | rfp1          | 9474.0   |          |       |
| mult           | y          | PLOT          |          |          |       |
|                | 2          | wc            | 150.0    |          |       |
|                |            | sc            | 6.2      |          |       |
|                |            | wc2           | 116.2    |          |       |
|                |            | sc2           | 0        |          |       |
|                |            | vs            | 113      |          |       |
|                |            | th            | 4        |          |       |
|                |            | ai            | cdc      |          |       |
|                |            |               | ph       |          |       |

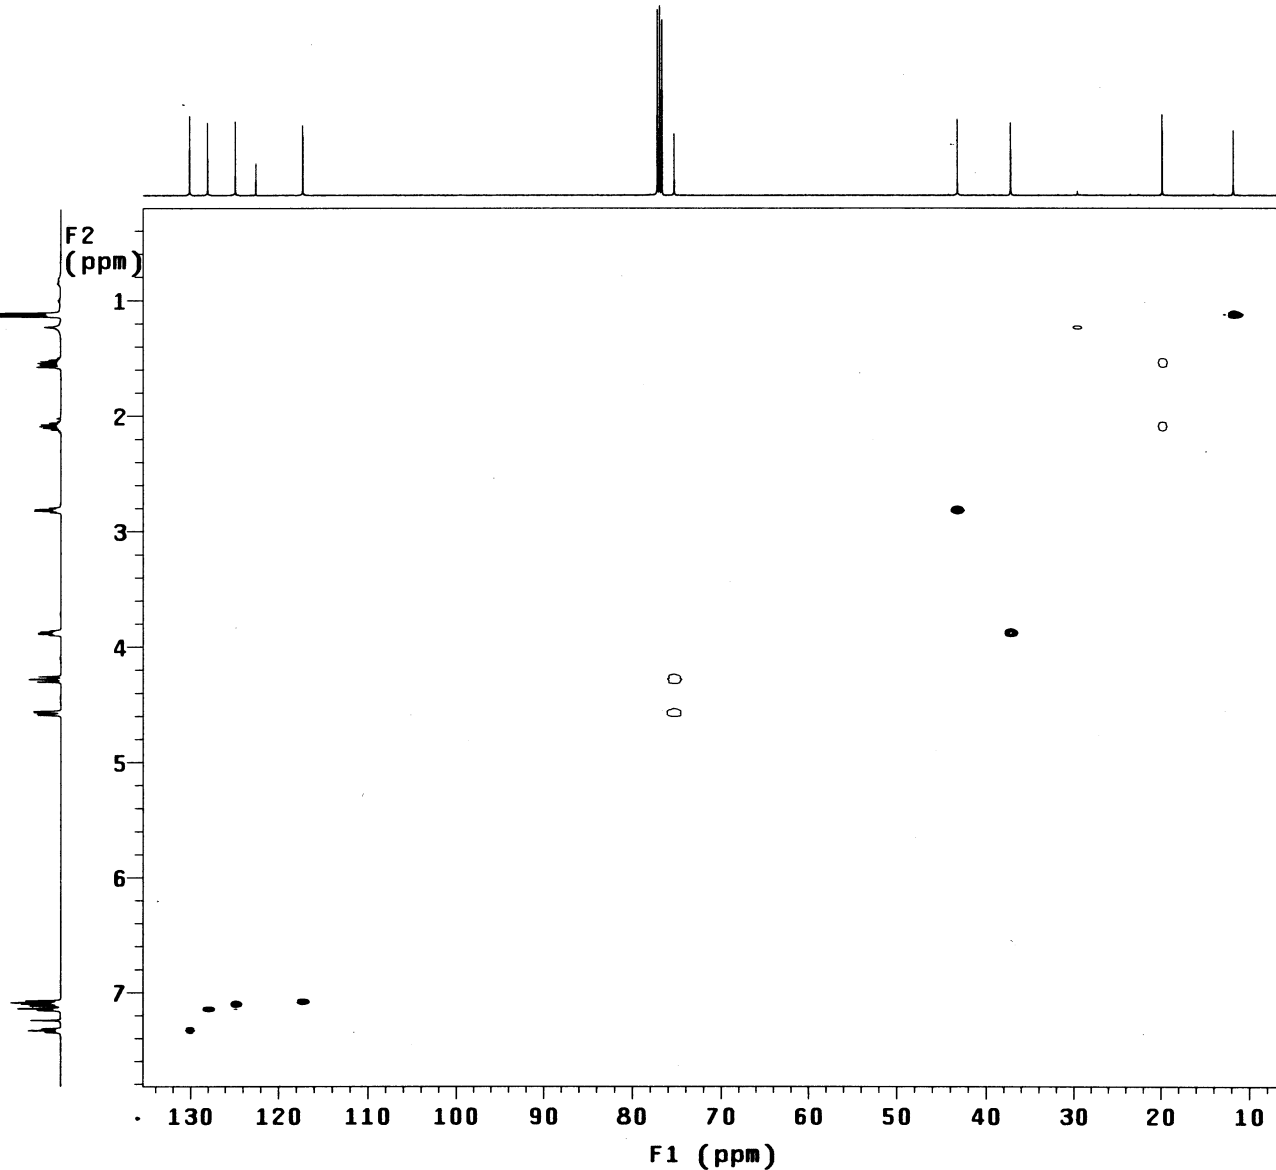



Fig S17. COSY of compound cis-3a

PMK-02-334-F1

exp26 #COSY Supplementary Material (ESI) for Organic & Biomolecular Chemistry

# This journal is (c) The Royal Society of Chemistry 2010

| SAMPLE         |            | FLAGS         |          |
|----------------|------------|---------------|----------|
| date           | Mar 8 2010 | hs            | nn       |
| solvent        | cdc13      | sspul         | n        |
| sample         | undefined  | hsglv1        | 1003     |
| ACQUISITION    |            | SPECIAL       |          |
| sw             | 5006.3     | temp          | not used |
| at             | 0.205      | gain          | 24       |
| np             | 2048       | spin          | 0        |
| fb             | not used   | F2 PROCESSING |          |
| ss             | 16         | sb            | -0.102   |
| d1             | 1.000      | sbs           | not used |
| nt             | 8          | fn            | 2048     |
| 2D ACQUISITION |            | F1 PROCESSING |          |
| sw1            | 5006.3     | sb1           | -0.026   |
| ni             | 128        | sbs1          | not used |
| TRANSMITTER    |            | PROC1         |          |
| tn             | H1         | fn1           | 2048     |
| sfrq           | 499.829    | DISPLAY       |          |
| tof            | -499.9     | sp            | -519.1   |
| tpwr           | 58         | wp            | 5001.4   |
| pw             | 11.100     | sp1           | -517.0   |
| GRADIENTS      |            | wp1           | 5001.4   |
| gzlv11         | 1003       | rf1           | 2663.2   |
| gt1            | 0.001000   | rfl           | 2139.3   |
| gstab          | 0.000500   | rfl1          | 2661.1   |
| DECOUPLER      |            | rflp1         | 2139.3   |
| dn             | C13        | PLOT          |          |
| dm             | nnn        | wc            | 155.0    |
|                |            | sc            | 10.0     |
|                |            | wc2           | 155.0    |
|                |            | sc2           | 0        |
|                |            | vs            | 113      |
|                |            | th            | 5        |
|                |            | ai            | cdc av   |

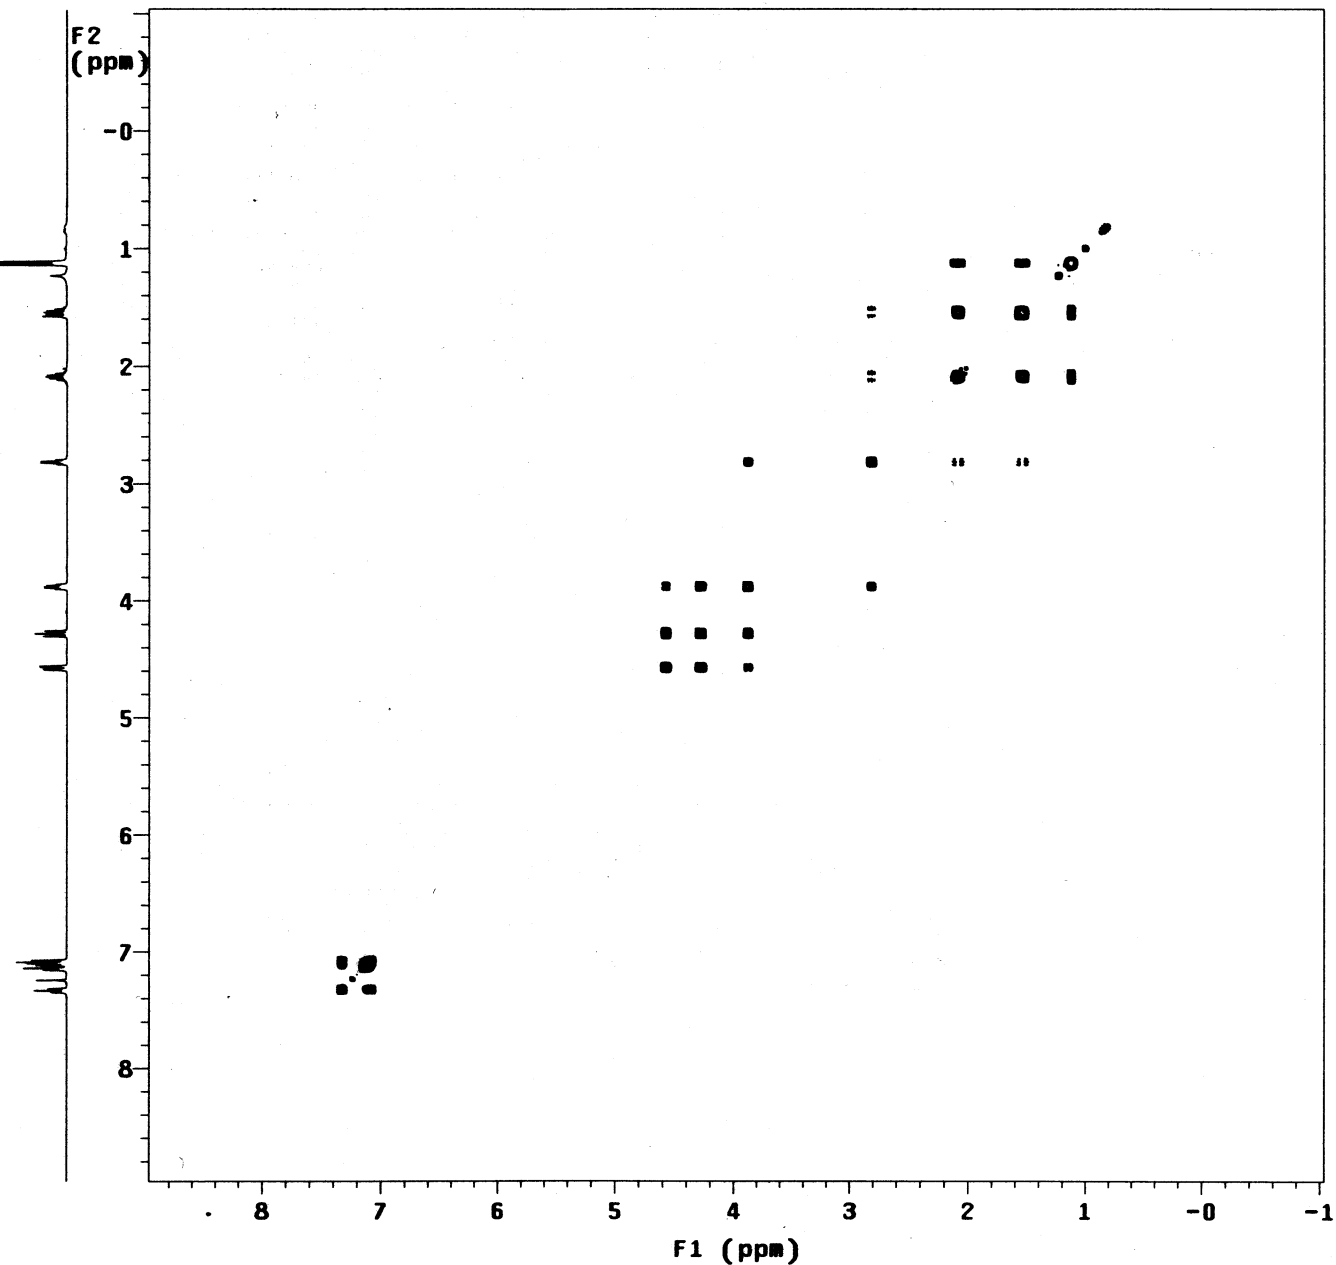

Fig S18. NOESY of compound cis-3a

PMK-02-334#3 Supplementary Material (ESI) for Organic & Biomolecular Chemistry  
 This journal is (c) The Royal Society of Chemistry 2010

```

exp28 NOESY

SAMPLE          FLAGS
date Mar  8 2010  hs          n
solvent cdc13      sspul         y
sample undefined PFD7lg      y
ACQUISITION     hsglv1      1003
sv 5006.3        SPECIAL
at 0.265         temp        not used
np 2048          gain         20
fb not used      spin         0
ss 32            F2 PROCESSING
d1 1.000         gf          0.094
nt 8             gfs         not used
2D ACQUISITION  fn          2048
sw1 5006.3      F1 PROCESSING
ni 200          gf1         0.037
TRANSMITTER     gfs1        not used
tn H1           procl        ip
sfrq 499.820    fn1         2048
sf -499.9       DISPLAY
spwr 50         sp          -522.1
pw 11.100       wp          5001.4
NOESY           sp1         -520.0
mix 0.600       wpi         5001.4
PRESATURATION   rf1         2666.2
satmode nnnn     rfp         2139.3
satpw 0         rf11        2664.2
satdly 0         rfp1        2139.3
satfrq 0        PLOT
DECOUPLER       wc          155.0
dn C13          sc          10.0
dm nnn         wc2         155.0
                   sc2          0
                   vs          113
                   th          1
                   at          ph
    
```

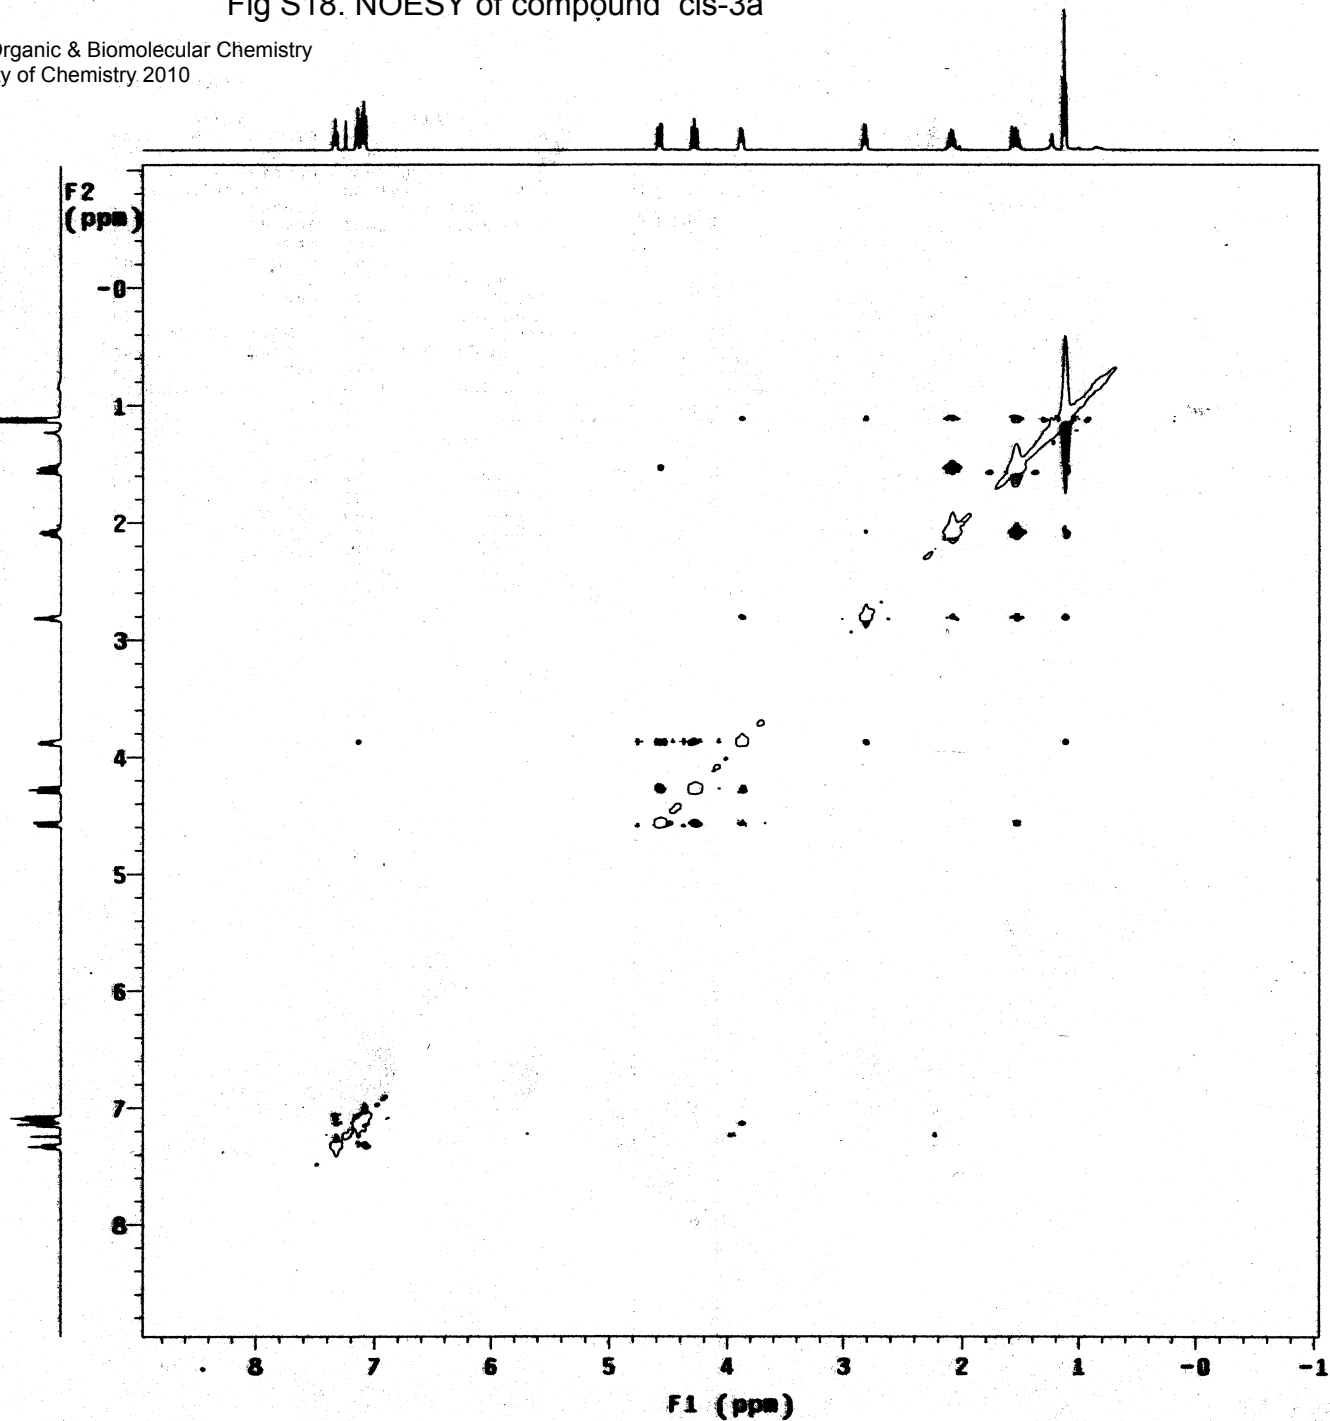

Fig S19. <sup>1</sup>H NMR (CDCl<sub>3</sub>, 500 MHz) of compound trans-3a

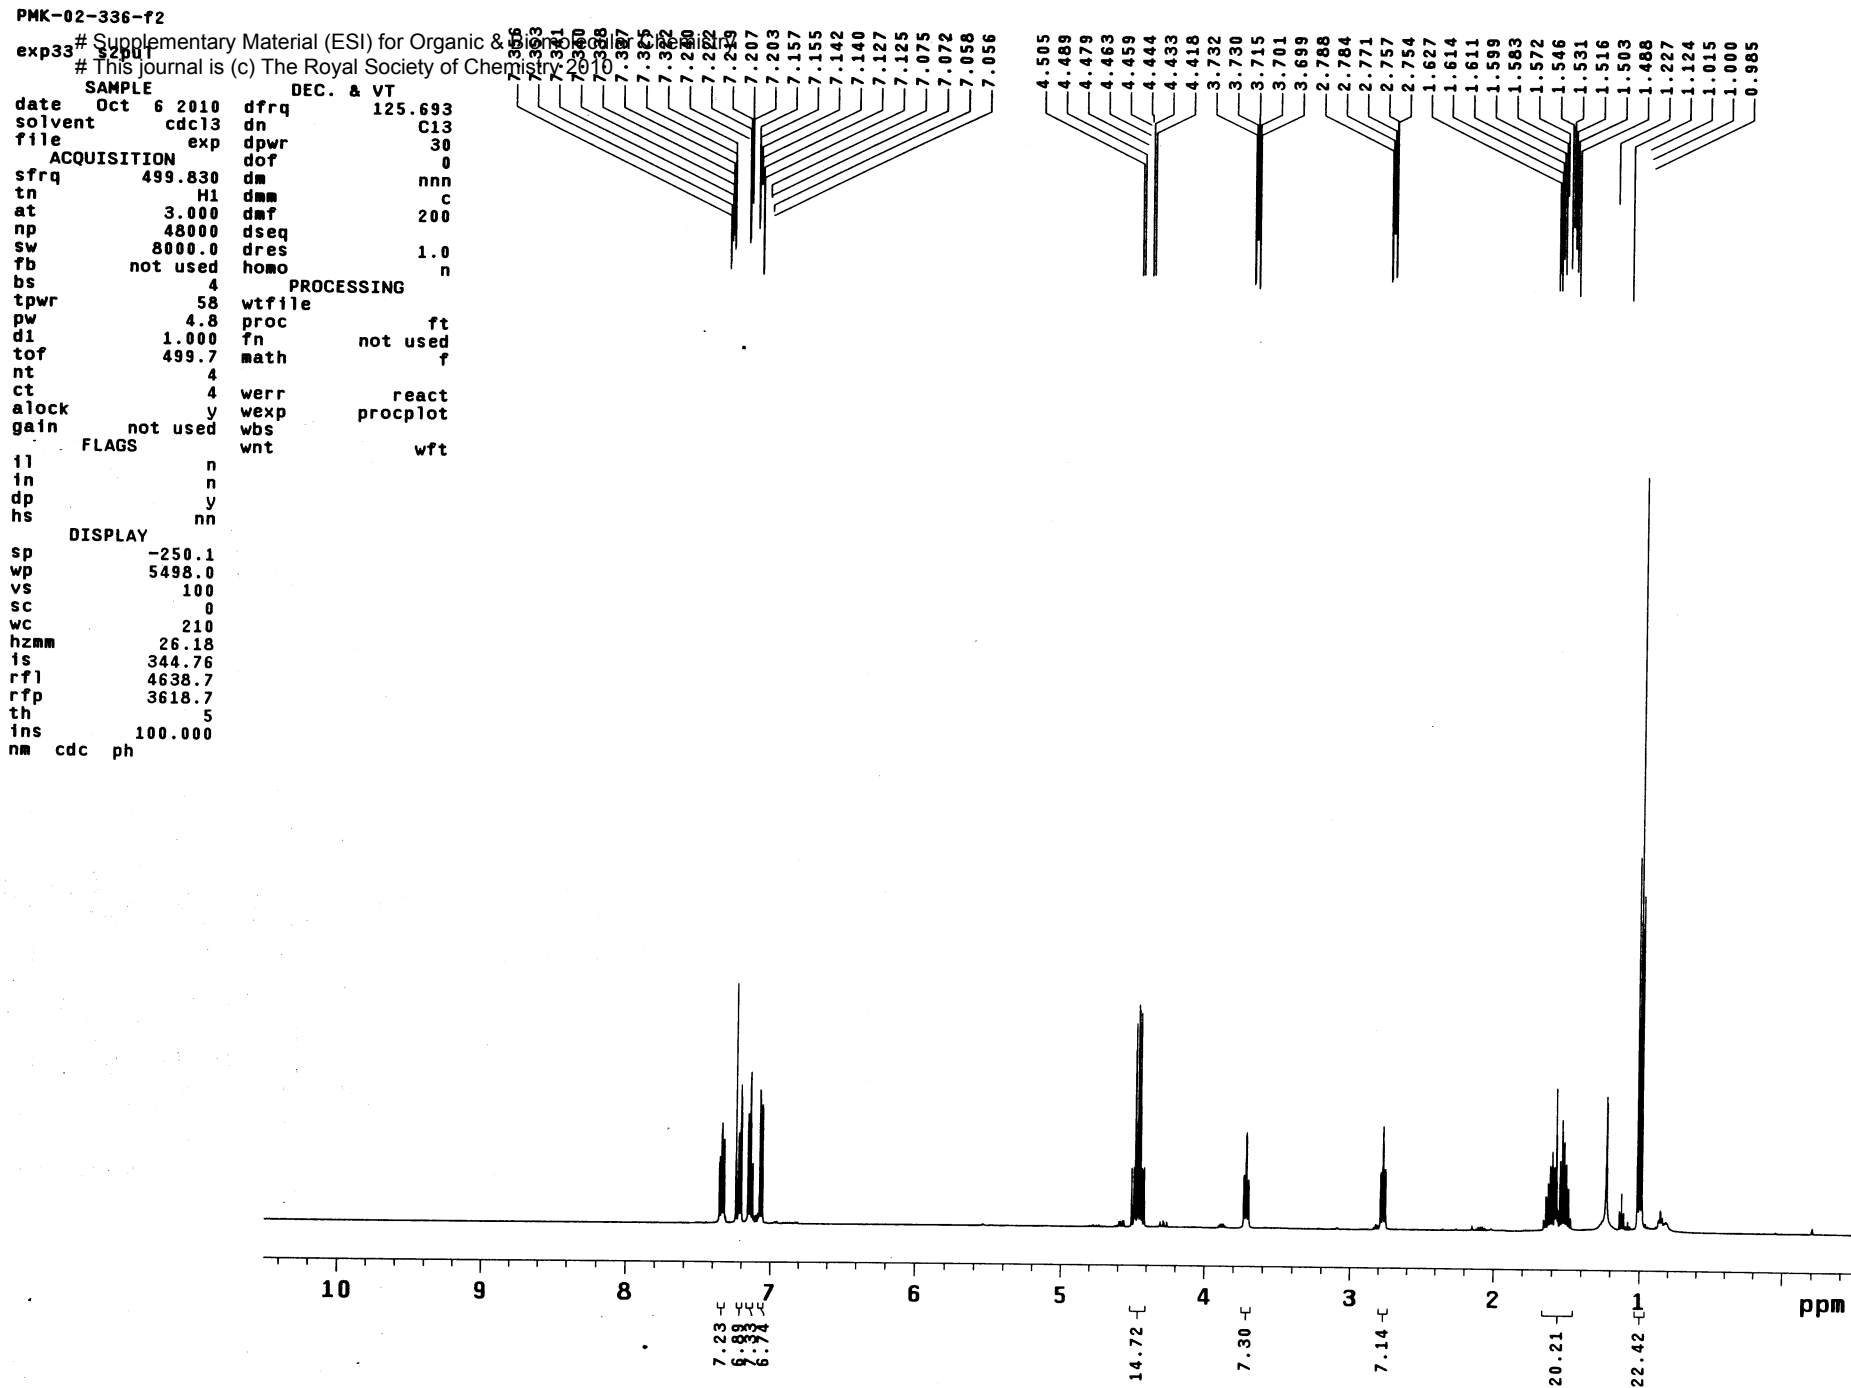

Fig S20. <sup>13</sup>C NMR (CDCl<sub>3</sub>, 125 MHz) of compound trans-3a

# Supplementary Material (ESI) for Organic & Biomolecular Chemistry  
 # This journal is (c) The Royal Society of Chemistry 2010  
 PMK-02-336-r2

exp34 s2pu1

|             |            |            |          |
|-------------|------------|------------|----------|
| SAMPLE      |            | DEC. & VT  |          |
| date        | Oct 6 2010 | dfrq       | 499.829  |
| solvent     | cdc13      | dn         | H1       |
| file        | exp        | dpwr       | 39       |
| ACQUISITION |            | dof        | 0        |
| sfrq        | 125.696    | dm         | yv       |
| tn          | C13        | dmm        | w        |
| at          | 1.000      | dmf        | 11905    |
| np          | 62894      | dseq       |          |
| sw          | 31446.5    | dres       | 1.0      |
| fb          | not used   | homo       | n        |
| bs          | 16         | PROCESSING |          |
| ss          | 2          | lb         | 1.00     |
| tpwr        | 54         | wtfile     |          |
| pw          | 3.0        | proc       | ft       |
| d1          | 2.000      | fn         | not used |
| tof         | 2512.2     | math       | f        |
| nt          | 2048       |            |          |
| ct          | 2048       | werr       | react    |
| aLock       | not used   | wexp       | procplot |
| gain        | not used   | wbs        | testsn   |
| FLAGS       |            | wnt        |          |
| il          | n          |            |          |
| in          | n          |            |          |
| dp          | y          |            |          |
| hs          | nn         |            |          |
| DISPLAY     |            |            |          |
| sp          | -1257.0    |            |          |
| wp          | 28906.3    |            |          |
| vs          | 200        |            |          |
| sc          | 0          |            |          |
| wc          | 210        |            |          |
| hzmm        | 137.65     |            |          |
| is          | 500.00     |            |          |
| rfl         | 10982.5    |            |          |
| rfl         | 9677.5     |            |          |
| th          | 5          |            |          |
| ins         | 100.000    |            |          |
| nm          | cdc ph     |            |          |

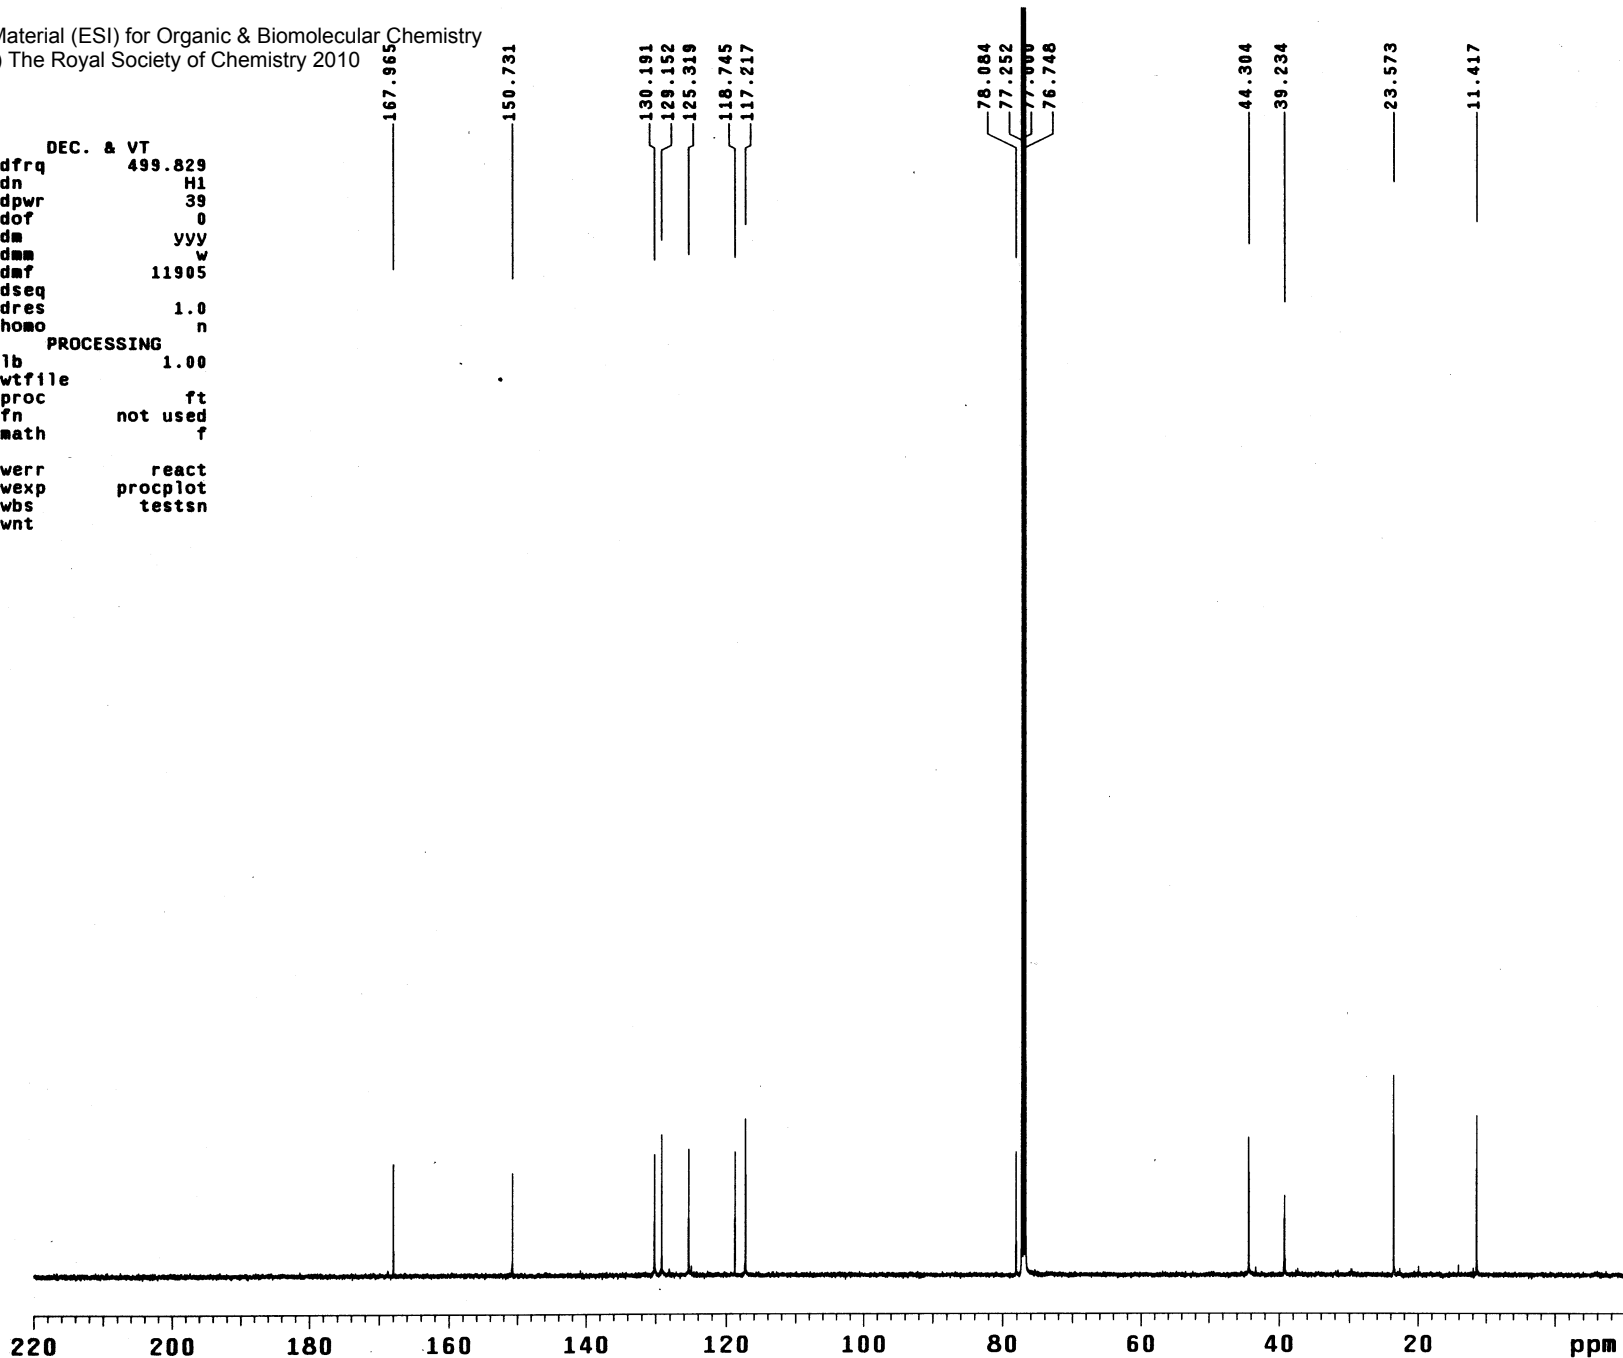

# Fig S21. DEPT of compound trans-3a

# Supplementary Material (ESI) for Organic & Biomolecular Chemistry

Permalink: <https://doi.org/10.1039/C9OB00000A> is (c) The Royal Society of Chemistry 2010

exp35 DEPT

|             |            |            |                    |       |
|-------------|------------|------------|--------------------|-------|
| SAMPLE      |            | DEPT       | ACQUISITION ARRAYS |       |
| date        | Oct 6 2010 | j1xh       | 140.0              | array |
| solvent     | cdc13      | mult       | arrayed            | mult  |
| sample      | undefined  | SPECIAL    | arraydim           | 3     |
| ACQUISITION |            | temp       | not used           | i     |
| sw          | 31446.5    | gain       | 20                 | 1     |
| at          | 1.000      | spin       | 0                  | 2     |
| np          | 62894      | PROCESSING | 3                  | 3     |
| bs          | 16         | lb         | 1.00               | mult  |
| ss          | -4         | fn         | not used           | 0.5   |
| d1          | 1.000      | SPECTRUM   |                    |       |
| nt          | 1024       | wp         | 28906.3            |       |
| ct          | 1024       | sp         | -1257.0            |       |
| TRANSMITTER |            | rp         | -128.2             |       |
| tn          | C13        | lp         | 212.8              |       |
| tof         | 2512.2     | ai         | cdc ph             |       |
| tpwr        | 54         | REFERENCE  |                    |       |
| pw          | 11.500     | rfl        | 1305.0             |       |
| DECOUPLER   |            | rfp        | 0                  |       |
| dn          | H1         | PLOT       |                    |       |
| dof         | 0          | wc         | 210                |       |
| dpwr        | 39         | sc         | 0                  |       |
| dm          | nny        | vs         | 200                |       |
| dmm         | ccw        | hzmm       | 137.65             |       |
| dmf         | 11905      | th         | 68                 |       |
| pp1v1       | 51         |            |                    |       |
| pp          | 31.000     |            |                    |       |

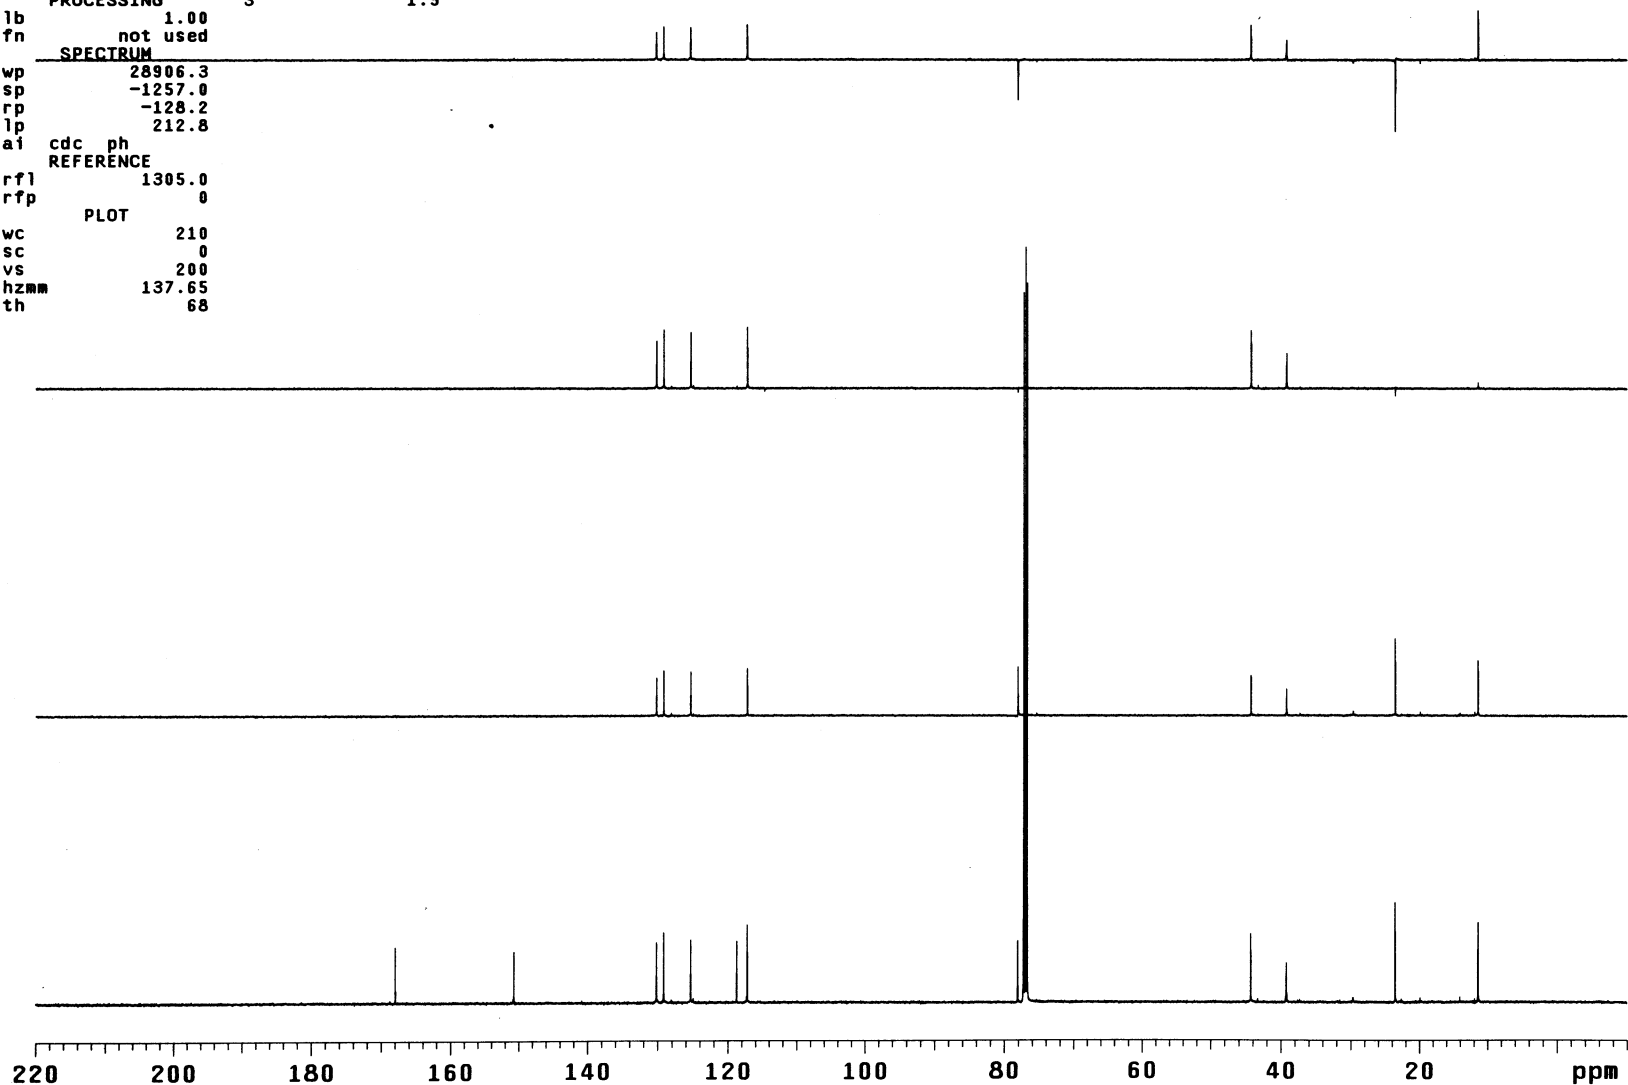

Fig S22. HSQC of compound trans-3a

# Supplementary Material (ESI) for Organic & Biomolecular Chemistry  
 # This journal is (c) The Royal Society of Chemistry 2010

PMK-02-336-f2

exp38 gHSQC

| SAMPLE         |            | FLAGS         | ACQUISITION | ARRAYS   |
|----------------|------------|---------------|-------------|----------|
| date           | Oct 6 2010 | hs            | n           | array    |
| solvent        | cdc13      | sspul         | y           | arraydim |
| sample         | undefined  | PFGflg        | y           | phase    |
| ACQUISITION    |            | hsglv1        | 1003        | i        |
| sw             | 4490.3     | SPECIAL       | 1           | phase    |
| at             | 0.228      | temp          | not used    | 2        |
| np             | 2048       | gain          | 48          |          |
| fb             | not used   | spin          | 0           |          |
| ss             | 32         | GRADIENTS     |             |          |
| d1             | 1.000      | gzlv11        | 1003        |          |
| nt             | 8          | gt1           | 0.002000    |          |
| 2D ACQUISITION |            | gzlv13        | 505         |          |
| sw1            | 21367.5    | gt3           | 0.001000    |          |
| ni             | 128        | gstab         | 0.000500    |          |
| phase          | arrayed    | F2 PROCESSING |             |          |
| TRANSMITTER    |            | gf            | 0.105       |          |
| tn             | H1         | gfs           | not used    |          |
| sfrq           | 499.829    | fn            | 2048        |          |
| tof            | -250.0     | F1 PROCESSING |             |          |
| tpwr           | 58         | gf1           | 0.006       |          |
| pw             | 11.100     | gfs1          | not used    |          |
| DECOUPLER      |            | proc1         | tp          |          |
| dn             | C13        | fn1           | 2048        |          |
| dof            | -2515.2    | DISPLAY       |             |          |
| dm             | nny        | sp            | 301.8       |          |
| dmm            | ccp        | wp            | 3587.0      |          |
| dmf            | 32258      | sp1           | 738.0       |          |
| dpwr           | 36         | wp1           | 16672.5     |          |
| pxlv1          | 52         | rfl           | 1870.8      |          |
| pxw            | 14.300     | rfp           | 1856.9      |          |
| HSQC           |            | rfl1          | 6217.1      |          |
| j1xh           | 140.0      | rfp1          | 4931.0      |          |
| nullflg        | y          | PLOT          |             |          |
| mult           | 2          | wc            | 150.0       |          |
|                |            | sc            | 6.2         |          |
|                |            | wc2           | 116.2       |          |
|                |            | sc2           | 0           |          |
|                |            | vs            | 100         |          |
|                |            | th            | 6           |          |
|                |            | ai            | cdc         | ph       |

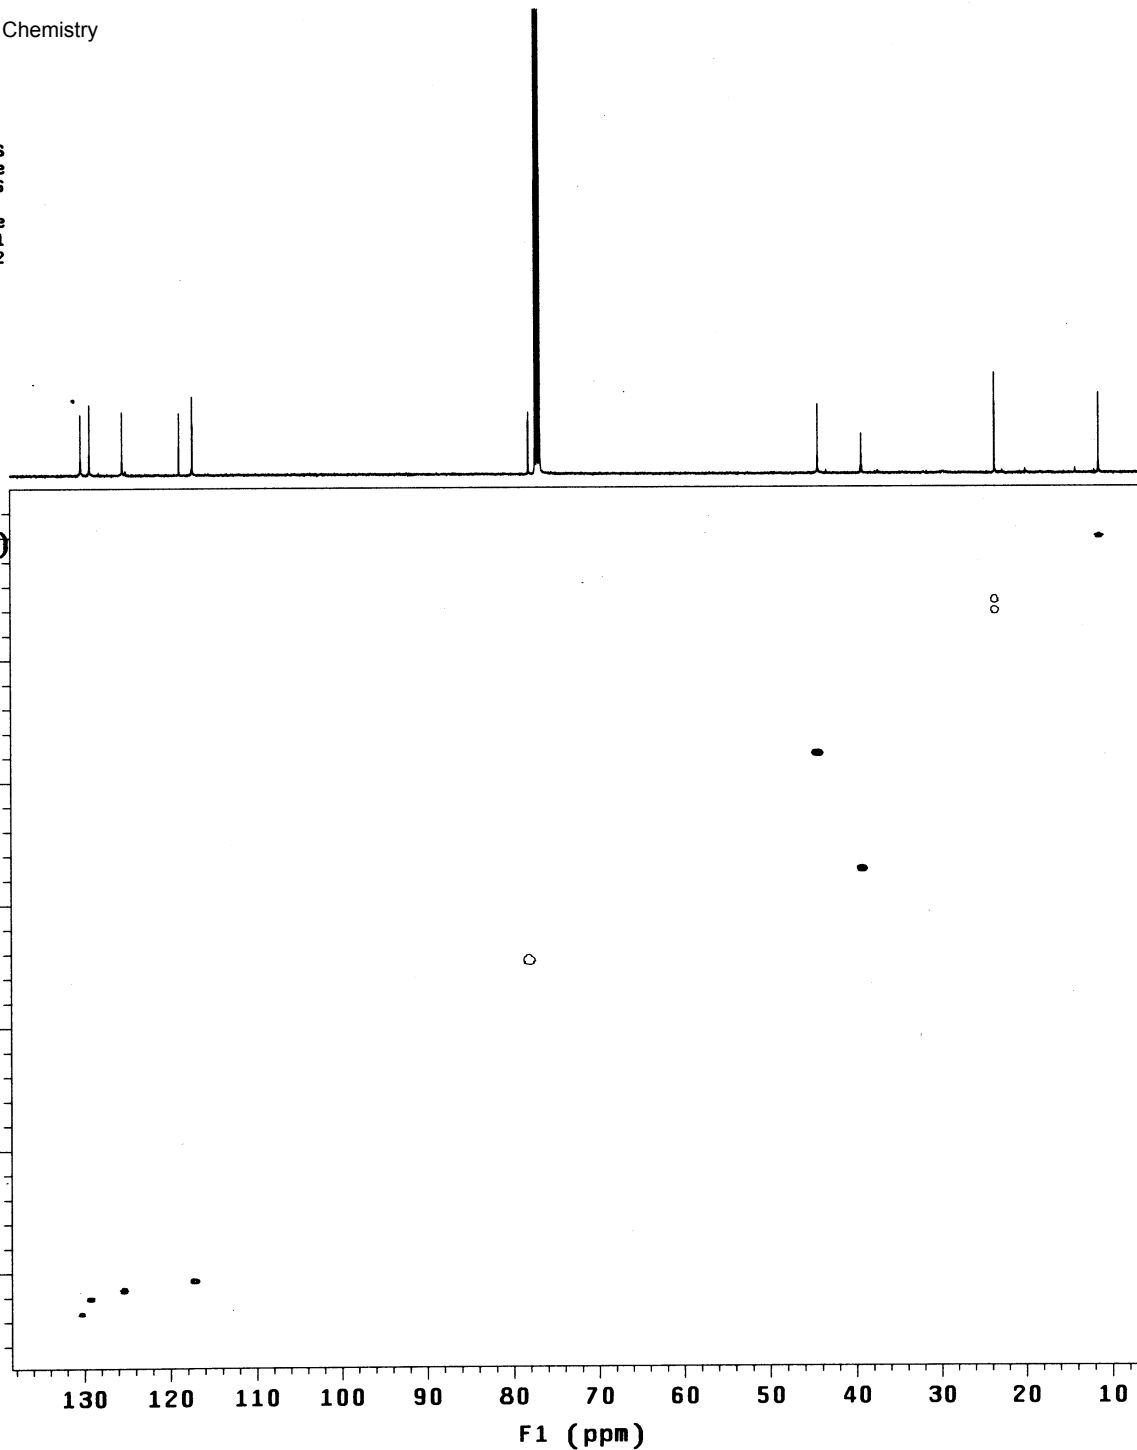

Fig S23.COSY of compound trans-3a

# Supplementary Material (ESI) for Organic & Biomolecular Chemistry  
 The Journal is (c) The Royal Society of Chemistry 2010

exp36 gCOSY

| SAMPLE         |            | FLAGS         |          |
|----------------|------------|---------------|----------|
| date           | Oct 6 2010 | hs            | nn       |
| solvent        | cdcl3      | sspul         | n        |
| sample         | undefined  | hsglv1        | 1003     |
| ACQUISITION    |            | SPECIAL       |          |
| sw             | 4490.3     | temp          | not used |
| at             | 0.228      | gain          | 20       |
| np             | 2048       | spin          | 0        |
| fb             | not used   | F2 PROCESSING |          |
| ss             | 16         | sb            | -0.114   |
| d1             | 1.000      | sbs           | not used |
| nt             | 8          | fn            | 2048     |
| 2D ACQUISITION |            | F1 PROCESSING |          |
| sw1            | 4490.3     | sb1           | -0.029   |
| ni             | 128        | sbs1          | not used |
| TRANSMITTER    |            | proc1         |          |
| tn             | H1         | lp            |          |
| sfrq           | 499.829    | fn1           | 2048     |
| tof            | -250.0     | DISPLAY       |          |
| tpwr           | 58         | sp            | 318.0    |
| pw             | 11.100     | wp            | 3494.9   |
| GRADIENTS      |            | sp1           | 317.7    |
| gzlv11         | 1003       | wp1           | 3499.3   |
| gt1            | 0.001000   | rfl           | 1872.1   |
| gstab          | 0.000500   | rff           | 1856.9   |
| DECOUPLER      |            | rfl1          | 1872.4   |
| dn             | C13        | rff1          | 1856.8   |
| dm             | nnn        | PLOT          |          |
|                |            | wc            | 155.0    |
|                |            | sc            | 10.0     |
|                |            | wc2           | 155.0    |
|                |            | sc2           | 0        |
|                |            | vs            | 100      |
|                |            | th            | 6        |
|                |            | ai            | cdc av   |

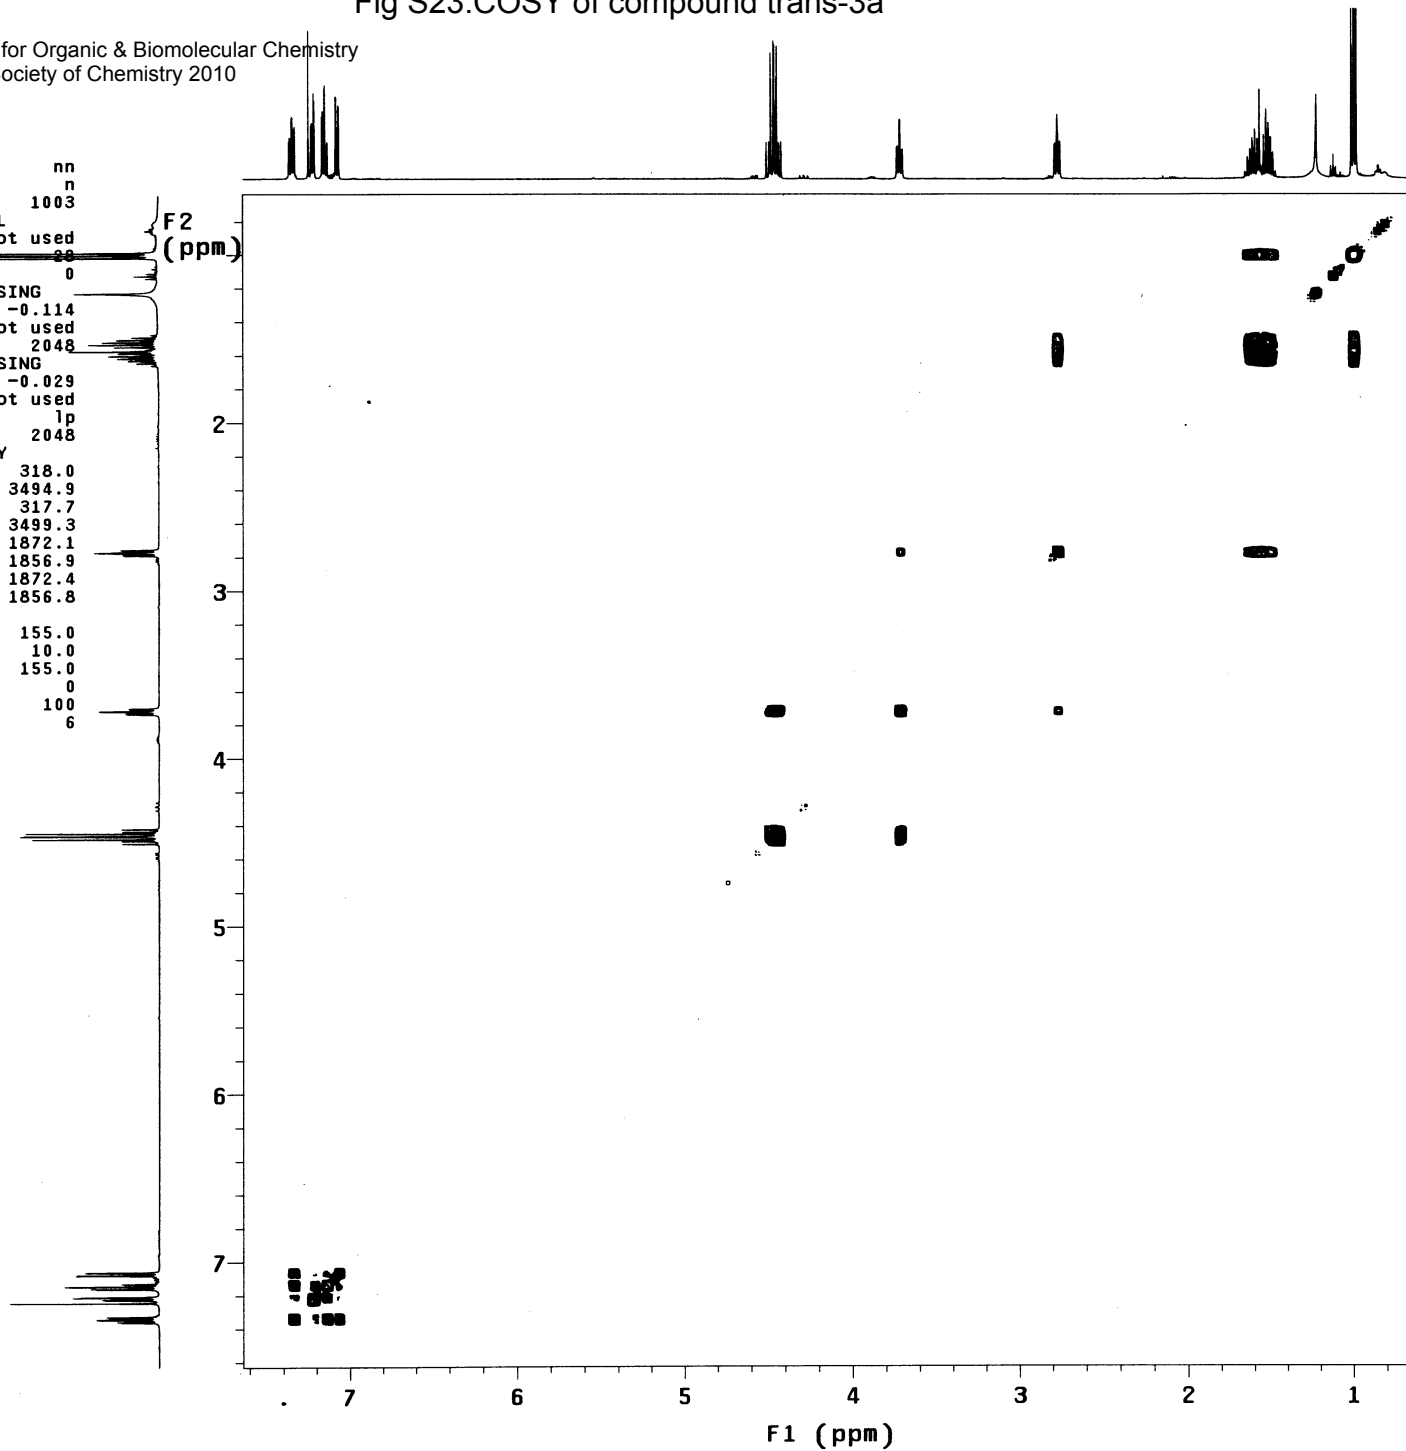

Fig S24. NOESY of compound trans-3a

# 20110317 Material (ESI) for Organic & Biomolecular Chemistry  
 # This journal is (c) The Royal Society of Chemistry 2010

```

SAMPLE          FLAGS
date Oct 6 2010 hs          n
solvent cdc13  sspul         y
sample undefined PFGflg      y
exp37 NOESY    hsglvi      1003
ACQUISITION
sw 4490.3      SPECIAL
at 0.228      temp      not used
np 2048       gain       28
fb not used   spin       0
ss 32         F2 PROCESSING
dl 1.000     gf         0.105
nt 8         gfs       not used
2D ACQUISITION
sw1 4490.3    F1 PROCESSING
n1 200       gf1       0.041
TRANSMITTER
tn H1        gfs1      not used
sfrq 499.829 procl     1p
tof -250.0   fn1       2048
tpwr 58      DISPLAY
pw 11.100   sp        251.5
NOESY      wp        3525.6
mix 0.600  sp1       252.1
PRESATURATION
satmode nnnn   rfp       1856.9
satpwr 0     rf1      1872.9
satdly 0     rf1l     1872.2
satfrq 0     rfp1     1856.8
DECOUPLER
dn C13      wc        155.0
dm nnn      sc         10.0
          wc2       155.0
          sc2        0
          vs        100
          th         1
          ai        ph
    
```

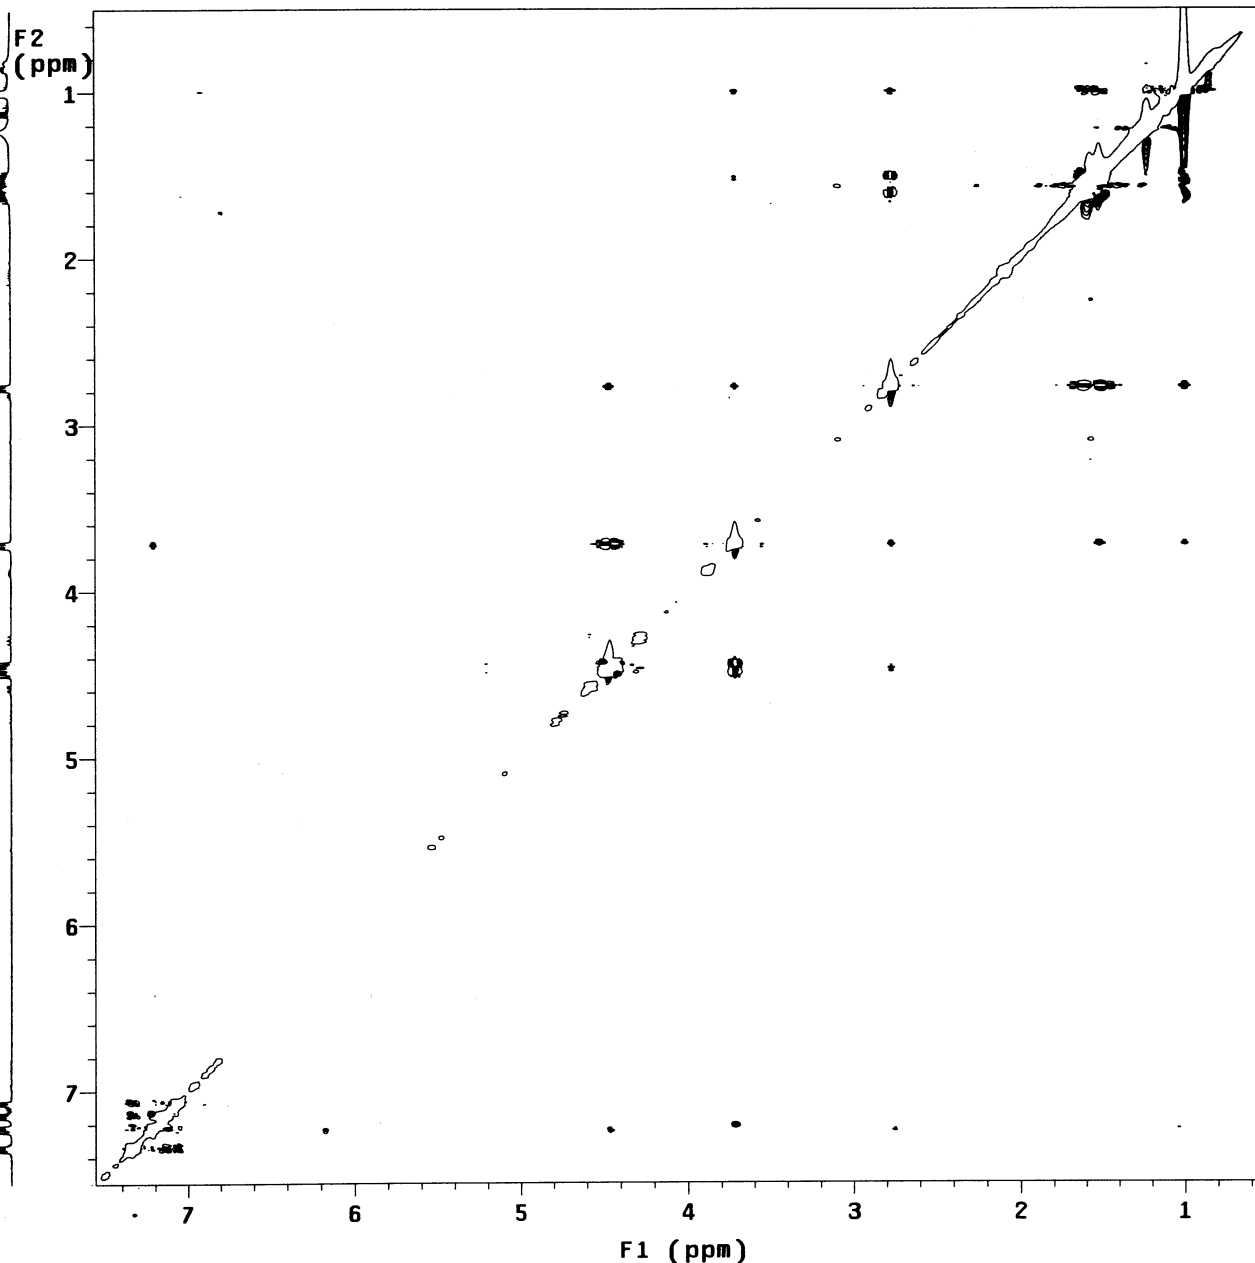



Fig S25. <sup>1</sup>H NMR (CDCl<sub>3</sub>, 500 MHz) of compound 3b

# Supplementary Material (ESI) for Organic & Biomolecular Chemistry

# This journal is (c) The Royal Society of Chemistry 2010

PMK-02-364

exp3 s2pu1

```

SAMPLE          DEC. & VT
date    Apr 13 2010  dfrq    125.693
solvent  cdc13      dn      C13
file     exp       dpwr    30
ACQUISITION    dof      0
sfrq     499.830  da      nnn
tn       H1       dmm      C
at       3.000    dmf     200
np       48000    dseq
sw       8000.0   dres    1.0
fb       not used homo
bs       4       PROCESSING
tpwr     58      wfile
pw       4.8     proc
d1       1.000   fn      not used
tof      499.7   math    f
nt       4
ct       4      werr    react
alock    y      wexp    procplot
gain     not used wbs
FLAGS    wnt    wft
il       n
in       n
dp       y
hs       nn

DISPLAY
sp       -250.1
wp       5248.0
vs       50
sc       0
wc       210
hzmm     24.99
is       274.81
rfl      4637.9
rfp      3618.7
th       4
ins      100.000
nm      cdc  ph
    
```

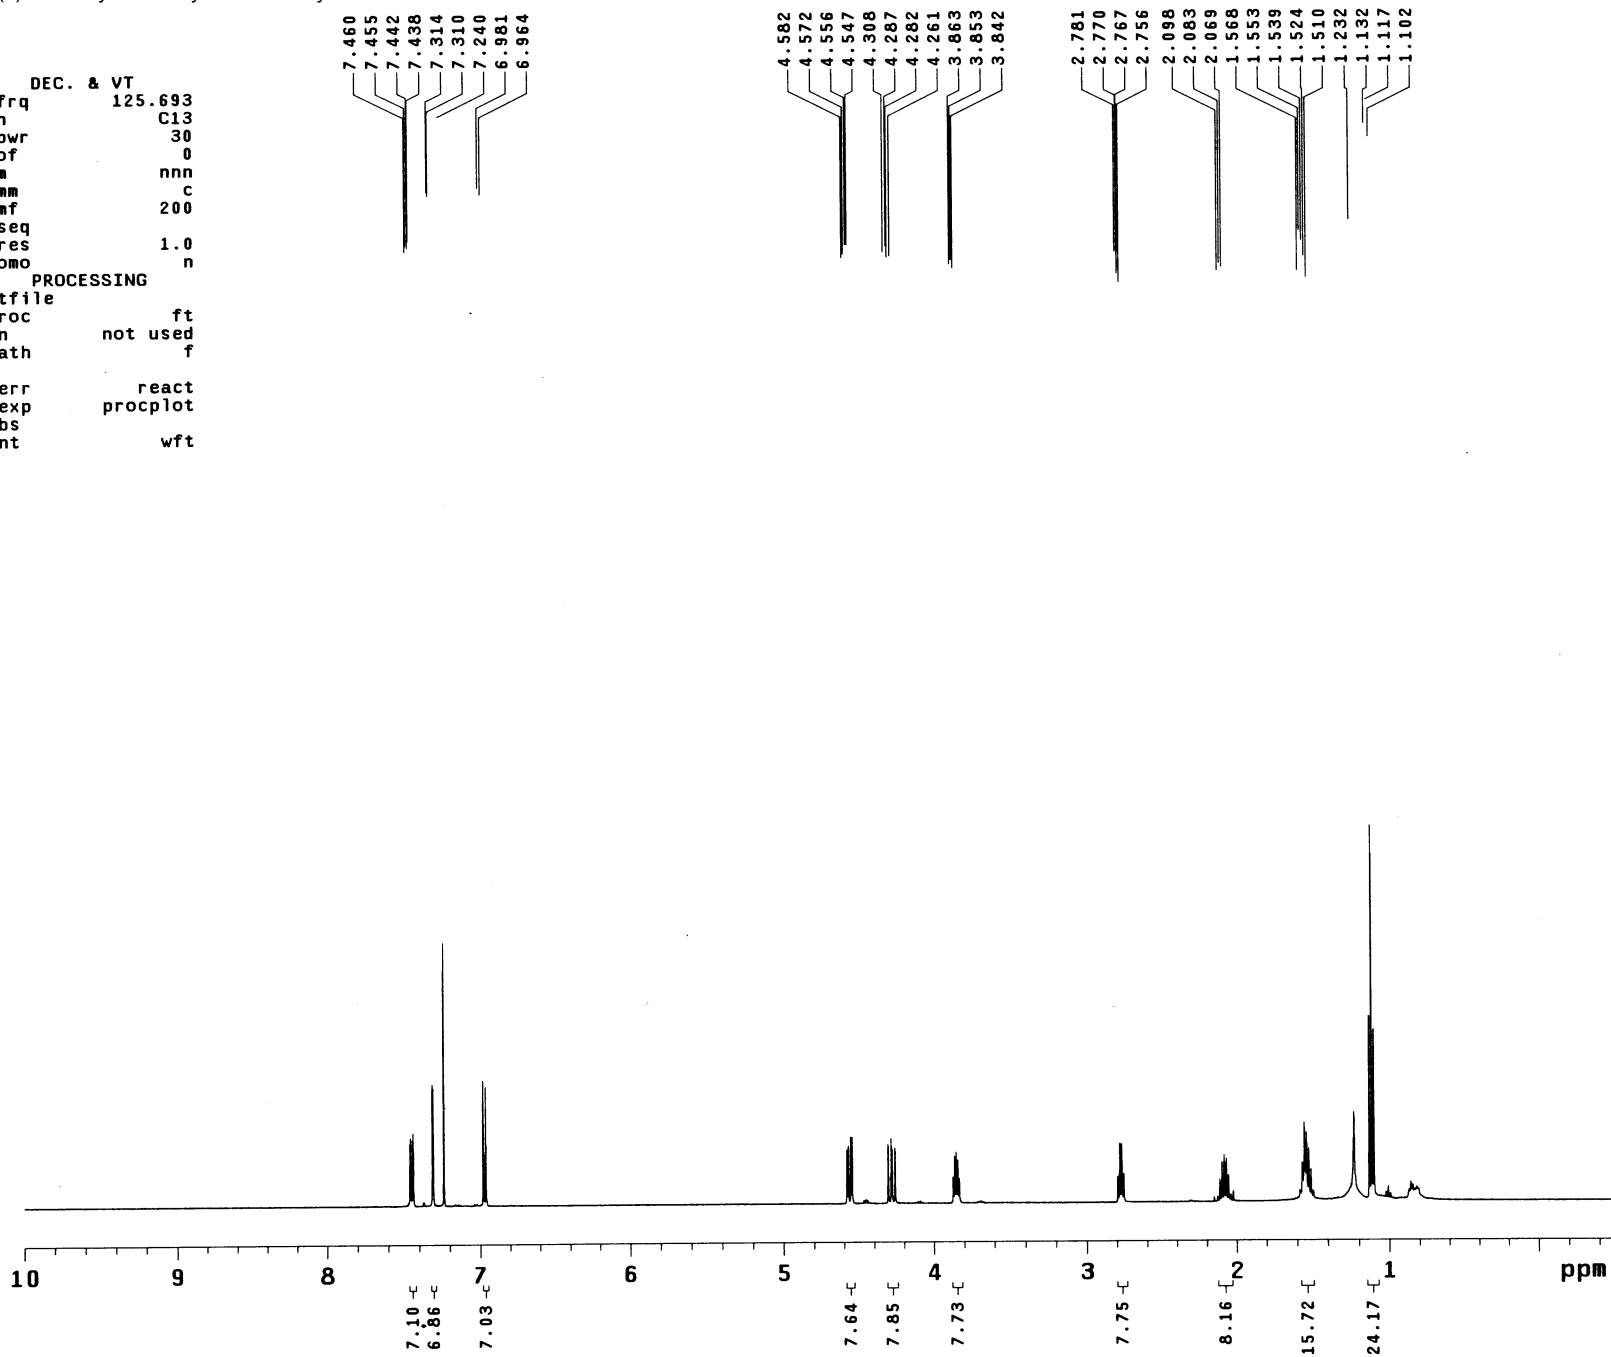

Fig S26. <sup>13</sup>C NMR (CDCl<sub>3</sub>, 125 MHz) of compound 3b

# Supplementary Material (ESI) for Organic & Biomolecular Chemistry  
 # This journal is (c) The Royal Society of Chemistry 2010

PMK-02-364  
 exp4 s2pu1

| SAMPLE      |             | DEC. & VT  |          |
|-------------|-------------|------------|----------|
| date        | Apr 13 2010 | dfrq       | 499.829  |
| solvent     | cdcl3       | dn         | H1       |
| file        | exp         | dpwr       | 39       |
| ACQUISITION |             | dof        | 0        |
| sfrq        | 125.696     | dm         | yyy      |
| tn          | C13         | dmm        | w        |
| at          | 1.000       | dmf        | 11905    |
| np          | 62894       | dseq       |          |
| sw          | 31446.5     | dres       | 1.0      |
| fb          | not used    | homo       | n        |
| bs          | 16          | PROCESSING |          |
| ss          | 2           | lb         | 1.00     |
| tpwr        | 54          | wtfile     |          |
| pw          | 4.0         | proc       | ft       |
| d1          | 1.000       | fn         | not used |
| tof         | 2512.2      | math       | f        |
| nt          | 2048        |            |          |
| ct          | 2048        | werr       | react    |
| alock       | y           | wexp       | proplot  |
| gain        | not used    | wbs        | testsn   |
| FLAGS       |             | wnt        |          |
| il          | n           |            |          |
| in          | n           |            |          |
| dp          | y           |            |          |
| hs          | nn          |            |          |
| DISPLAY     |             |            |          |
| sp          | -1257.0     |            |          |
| wp          | 28906.3     |            |          |
| vs          | 150         |            |          |
| sc          | 0           |            |          |
| wc          | 210         |            |          |
| hzmm        | 137.65      |            |          |
| is          | 500.00      |            |          |
| rfl         | 10981.5     |            |          |
| rfp         | 9677.5      |            |          |
| th          | 5           |            |          |
| ins         | 100.000     |            |          |
| nm          | cdc ph      |            |          |

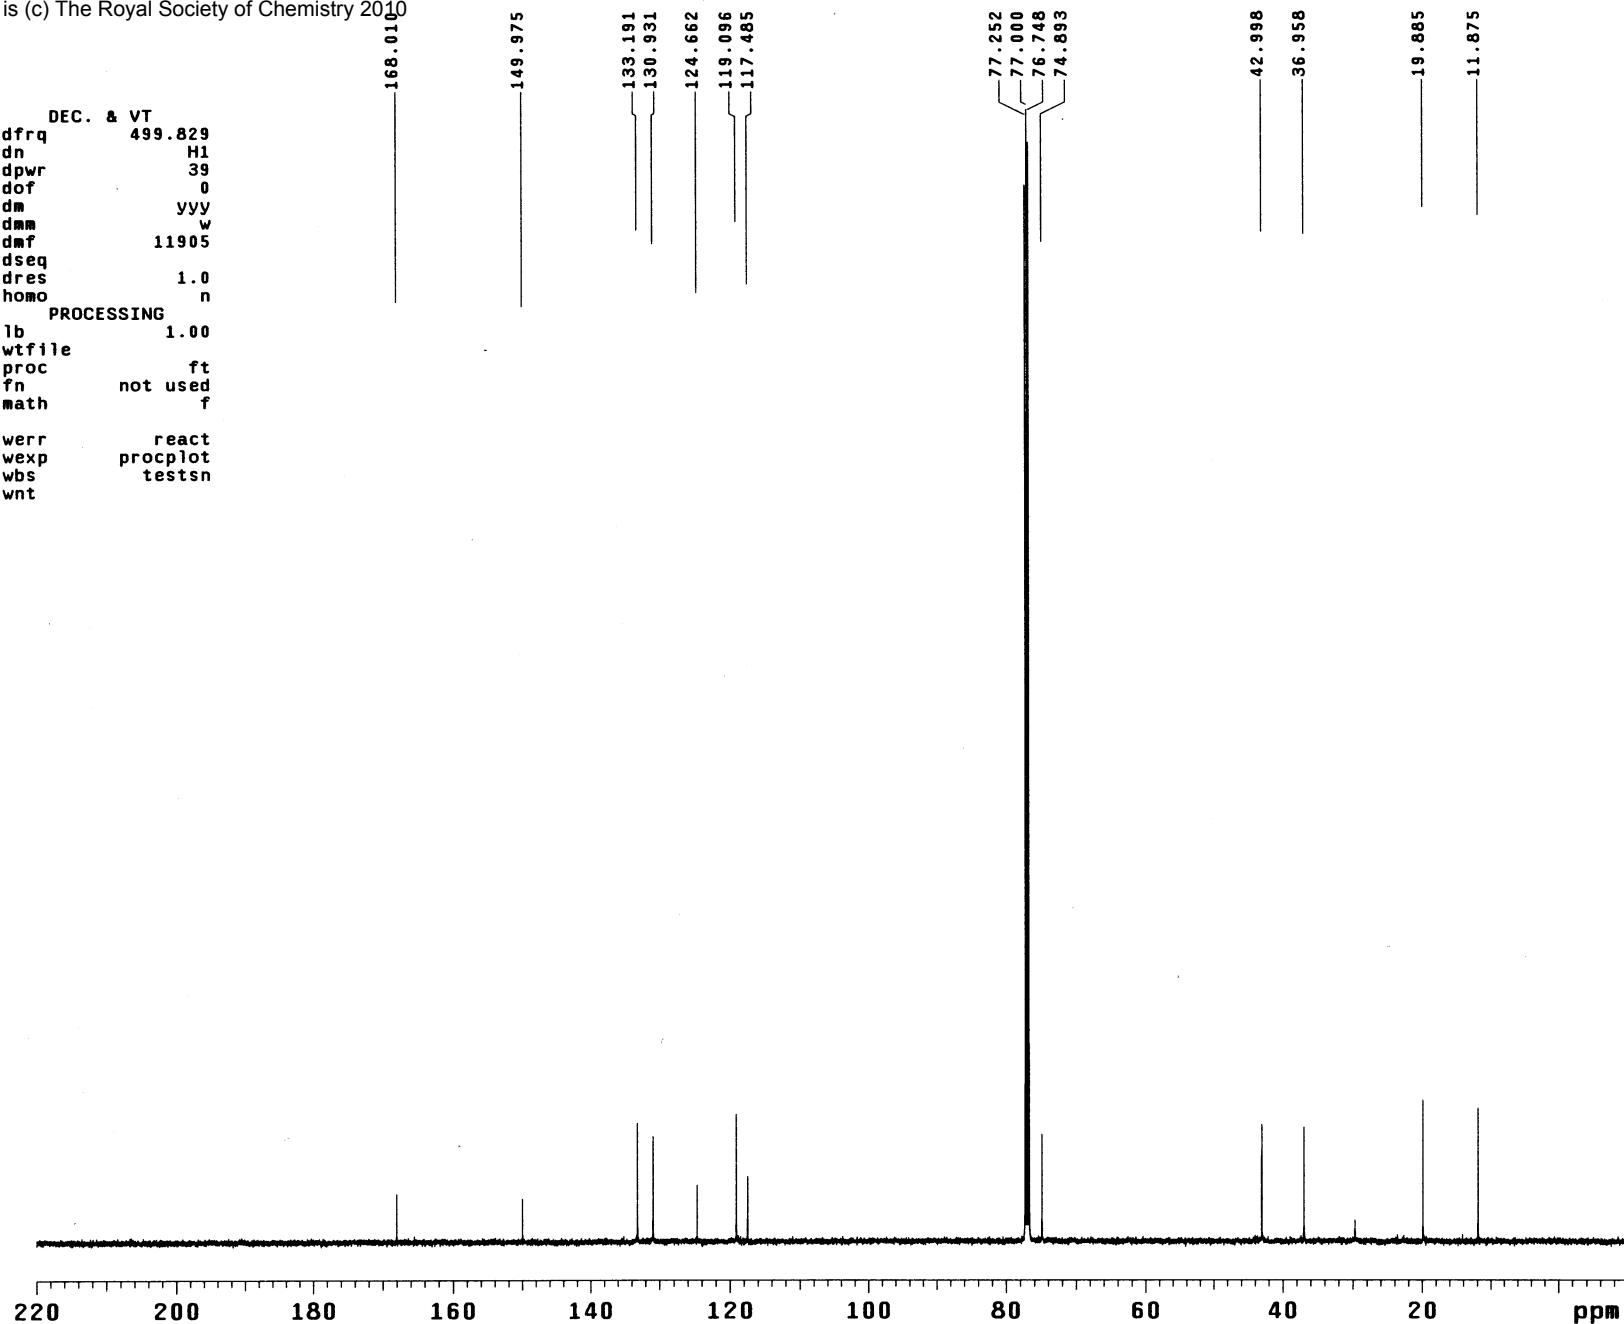

Fig S27. DEPT of compound 3b

PMK-02-364

# Supplementary Material (ESI) for Organic & Biomolecular Chemistry

exp5 DEPT# This journal is (c) The Royal Society of Chemistry 2010

|             |             |            |          |          |      |
|-------------|-------------|------------|----------|----------|------|
| date        | Apr 13 2010 | j1xh       | 140.0    | array    | mult |
| solvent     | cdc13       | mult       | arrayed  | arraydim | 3    |
| sample      | undefined   | SPECIAL    |          |          |      |
| ACQUISITION |             | temp       | not used | i        | mult |
| sw          | 31446.5     | gain       | 34       | 1        | 0.5  |
| at          | 1.000       | spin       | 0        | 2        | 1    |
| np          | 62894       | PROCESSING |          | 3        | 1.5  |
| bs          | 16          | lb         | 1.00     |          |      |
| ss          | -4          | fn         | not used |          |      |
| dl          | 1.000       | SPECTRUM   |          |          |      |
| nt          | 2048        | wp         | 28906.3  |          |      |
| ct          | 2048        | sp         | -1257.0  |          |      |
| TRANSMITTER |             | rp         | 48.6     |          |      |
| tn          | C13         | lp         | 170.9    |          |      |
| tof         | 2512.2      | ai         | cdc ph   |          |      |
| tpwr        | 54          | REFERENCE  |          |          |      |
| pw          | 11.500      | rfl        | 1303.1   |          |      |
| DECOUPLER   |             | rfp        | 0        |          |      |
| dn          | H1          | PLOT       |          |          |      |
| dof         | 0           | wc         | 210      |          |      |
| dpwr        | 39          | sc         | 0        |          |      |
| dm          | nny         | vs         | 500      |          |      |
| dmm         | ccw         | hzmm       | 137.65   |          |      |
| dmf         | 11905       | th         | 68       |          |      |
| pp1v1       | 51          |            |          |          |      |
| pp          | 28.000      |            |          |          |      |

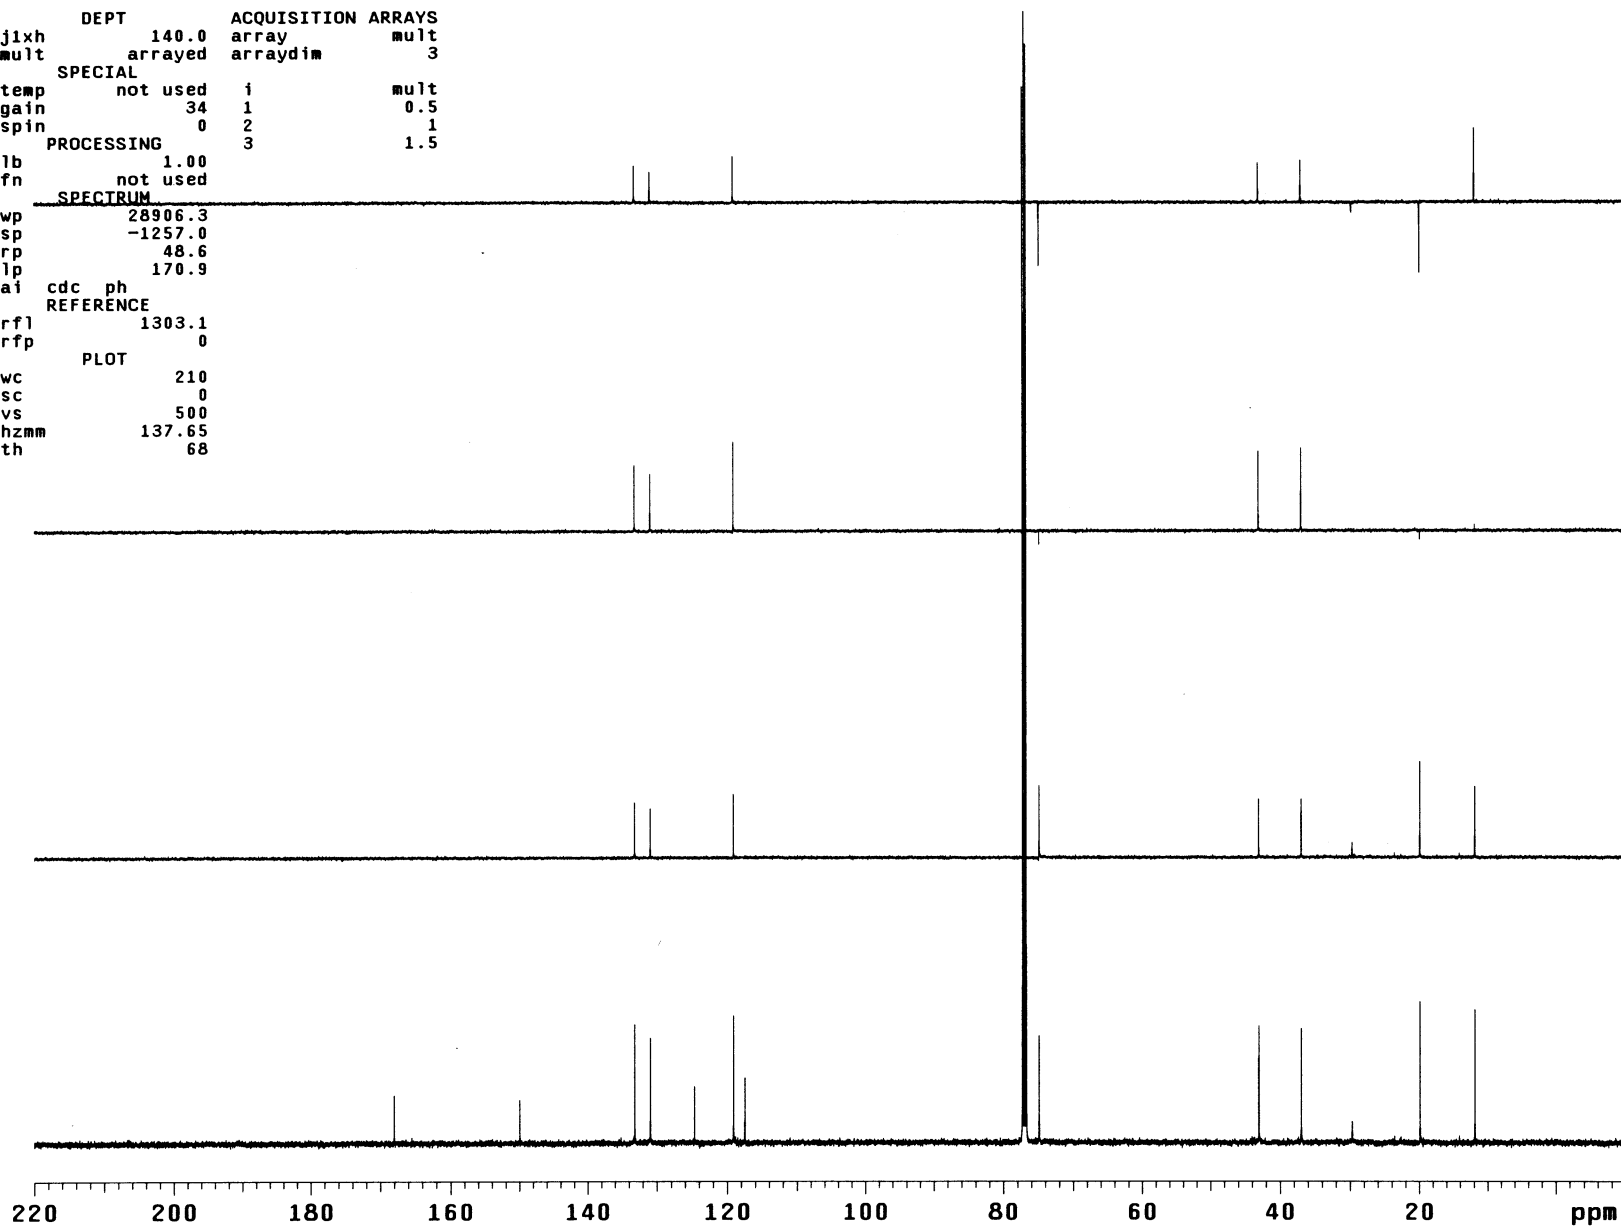

Fig S28. HSQC of compound 3b

PMK-02-364 # Supplementary Material (ESI) for Organic & Biomolecular Chemistry  
 # This journal is (c) The Royal Society of Chemistry 2010

exp8 gHSQC

| SAMPLE           | FLAGS         | ACQUISITION | ARRAYS   |
|------------------|---------------|-------------|----------|
| date Apr 13 2010 | hs            | n           | array    |
| solvent cdc13    | sspul         | y           | arraydim |
| sample undefined | PFGflg        | y           | phase    |
| ACQUISITION      | hsglv1        | 1003        | 1        |
| sw 4490.3        | SPECIAL       |             | 1        |
| at 0.228         | temp          | not used    | 2        |
| np 2048          | gain          | 20          |          |
| fb not used      | spin          | 0           |          |
| ss 32            | GRADIENTS     |             |          |
| d1 1.000         | gz1vl1        | 1003        |          |
| nt 16            | gt1           | 0.002000    |          |
| 2D ACQUISITION   | gz1vl3        | 505         |          |
| sw1 21367.5      | gt3           | 0.001000    |          |
| ni 128           | gstab         | 0.000500    |          |
| phase arrayed    | F2 PROCESSING |             |          |
| TRANSMITTER      | gf            | 0.105       |          |
| tn H1            | gfs           | not used    |          |
| sfrq 499.829     | fn            | 2048        |          |
| tof -250.0       | F1 PROCESSING |             |          |
| tpwr 58          | gf1           | 0.006       |          |
| pw 11.100        | gfs1          | not used    |          |
| DECOUPLER        | proc1         | lp          |          |
| dn C13           | fn1           | 2048        |          |
| dof -2515.2      | DISPLAY       |             |          |
| dm nny           | sp            | 447.0       |          |
| dmm ccp          | wp            | 3569.5      |          |
| dmf 32258        | sp1           | 792.8       |          |
| dpwr 36          | wp1           | 16776.8     |          |
| pwxlvl 52        | rfl           | 571.8       |          |
| pw 14.300        | rfp           | 558.3       |          |
| HSQC             | rfl1          | 2765.4      |          |
| j1xh 140.0       | rfp1          | 1492.5      |          |
| nullflg y        | PLOT          |             |          |
| mult 2           | wc            | 150.0       |          |
|                  | sc            | 6.2         |          |
|                  | wc2           | 116.2       |          |
|                  | sc2           | 0           |          |
|                  | vs            | 100         |          |
|                  | th            | 6           |          |
|                  | ai cdc ph     |             |          |

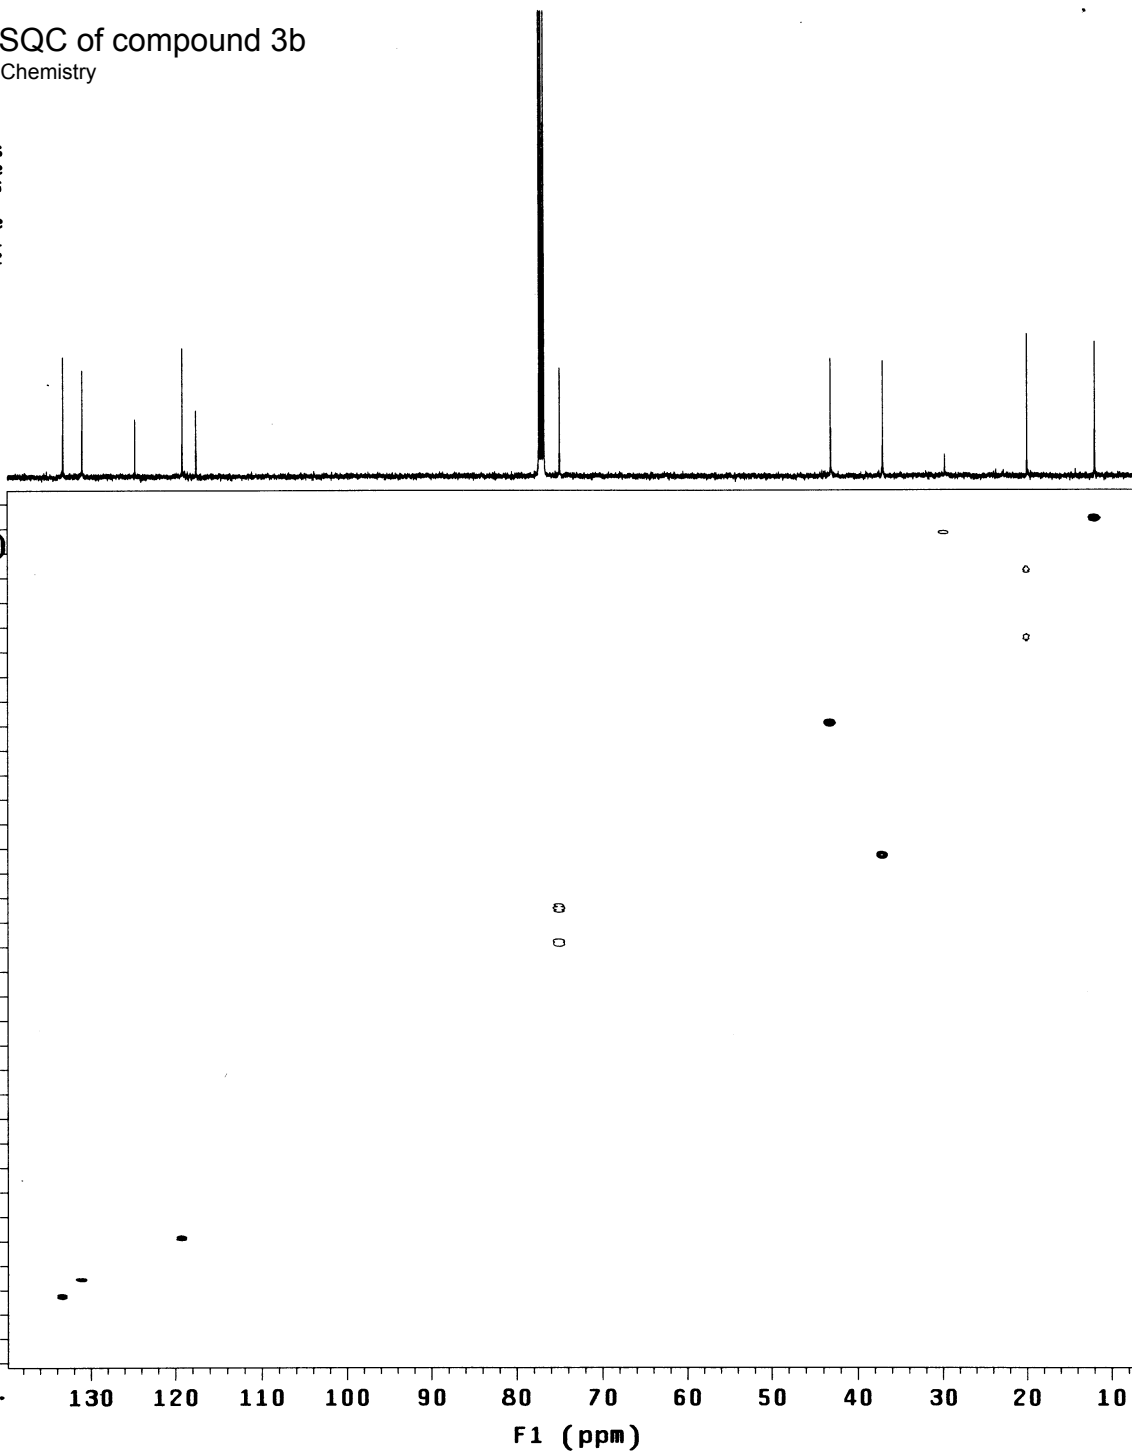

Fig S29. COSY of compound 3b

# Supplementary Material (ESI) for Organic & Biomolecular Chemistry  
 PMK-02-2010-11 This journal is (c) The Royal Society of Chemistry 2010

exp6 gCOSY

|                |             |               |            |
|----------------|-------------|---------------|------------|
| date           | Apr 13 2010 | hs            | nn         |
| solvent        | cdc13       | sspul         | n          |
| sample         | undefined   | hsglv1        | 1003       |
| ACQUISITION    |             | SPECIAL       |            |
| sw             | 4490.3      | temp          | not used   |
| at             | 0.228       | gain          | 34         |
| np             | 2048        | spin          | 0          |
| fb             | not used    | F2            | PROCESSING |
| ss             | 16          | sb            | -0.114     |
| dl             | 1.000       | sbs           | not used   |
| nt             | 16          | fn            | 2048       |
| 2D ACQUISITION |             | F1 PROCESSING |            |
| sw1            | 4490.3      | sb1           | -0.029     |
| ni             | 128         | sbs1          | not used   |
| TRANSMITTER    |             | proc1         |            |
| tn             | H1          | fn1           | 2048       |
| sfrq           | 499.829     | DISPLAY       |            |
| tof            | -250.0      | sp            | 312.7      |
| tpwr           | 58          | wp            | 3578.2     |
| pw             | 11.100      | sp1           | 300.4      |
| GRADIENTS      |             | wp1           | 3582.6     |
| gzlv11         | 1003        | rfl           | 574.5      |
| gt1            | 0.001000    | rfp           | 558.3      |
| gstab          | 0.000500    | rfl1          | 573.6      |
| DECOUPLER      |             | rfp1          | 558.3      |
| dn             | C13         | PLOT          |            |
| dm             | nnn         | wc            | 155.0      |
|                |             | sc            | 10.0       |
|                |             | wc2           | 155.0      |
|                |             | sc2           | 0          |
|                |             | vs            | 100        |
|                |             | th            | 8          |
|                |             | ai            | cdc av     |

F2  
(ppm)

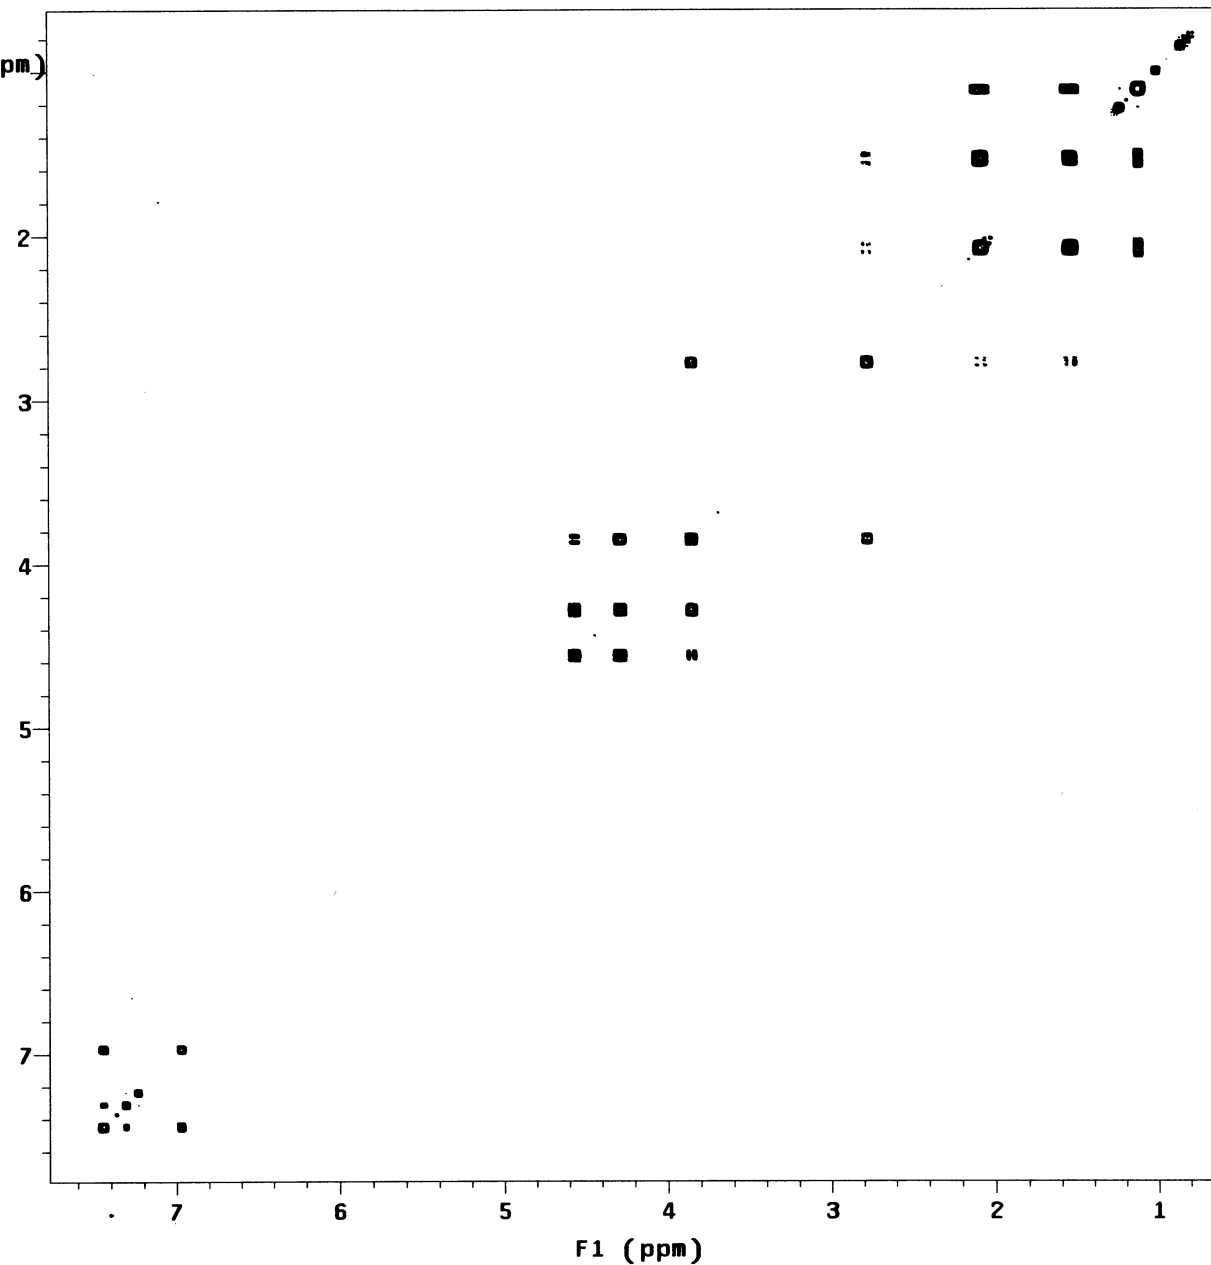

Fig S30. NOESY of compound 3b

# Supplementary Material (ESI) for Organic & Biomolecular Chemistry  
 PMK-02-367 This journal is (c) The Royal Society of Chemistry 2010

exp7 NOESY

|                |             |               |          |
|----------------|-------------|---------------|----------|
| date           | Apr 13 2010 | hs            | n        |
| solvent        | cdcl3       | sspul         | y        |
| sample         | undefined   | PFGflg        | y        |
| ACQUISITION    |             | hsglv         | 1003     |
| sw             | 4490.3      | SPECIAL       |          |
| at             | 0.228       | temp          | not used |
| np             | 2048        | gain          | 34       |
| fb             | not used    | spin          | 0        |
| ss             | 32          | F2 PROCESSING |          |
| d1             | 1.000       | gf            | 0.105    |
| nt             | 8           | gfs           | not used |
| 2D ACQUISITION |             | fn            | 2048     |
| sw1            | 4490.3      | F1 PROCESSING |          |
| ni             | 200         | gf1           | 0.041    |
| TRANSMITTER    |             | gfs1          | not used |
| tn             | H1          | proc1         | lp       |
| sfrq           | 499.829     | fn1           | 2048     |
| tof            | -250.0      | DISPLAY       |          |
| tpwr           | 58          | sp            | 240.0    |
| pw             | 11.100      | wp            | 3652.8   |
| NOESY          |             | sp1           | 236.2    |
| mix            | 0.600       | wp1           | 3657.2   |
| PRESATURATION  |             | rfl           | 572.6    |
| satmode        | nnnn        | rfp           | 558.3    |
| satpwr         | 0           | rfl1          | 572.0    |
| satdly         | 0           | rfp1          | 558.3    |
| satfrq         | 0           | PLOT          |          |
| DECOUPLER      |             | wc            | 155.0    |
| dn             | C13         | sc            | 10.0     |
| dm             | nnn         | wc2           | 155.0    |
|                |             | sc2           | 0        |
|                |             | vs            | 100      |
|                |             | th            | 2        |
|                |             | ai            | ph       |

F2 (ppm)

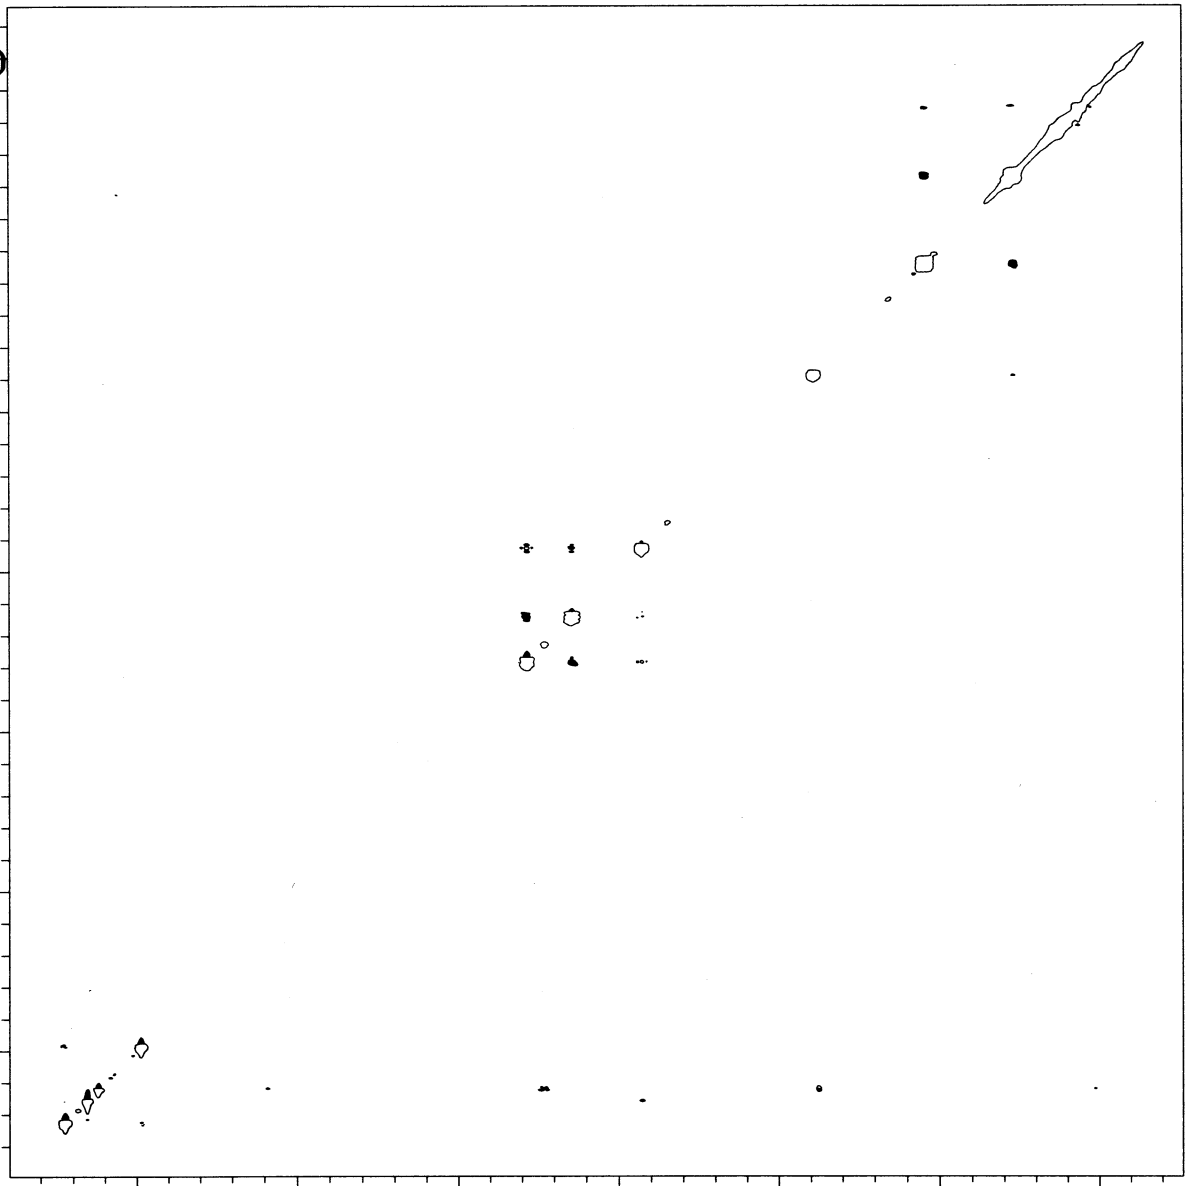

F1 (ppm)

Fig S31. <sup>1</sup>H NMR (CDCl<sub>3</sub>, 500 MHz) of compound 3c

# Supplementary Material (ESI) for Organic & Biomolecular Chemistry

PMK-02-365 This journal is (c) The Royal Society of Chemistry 2010

exp23 s2pu1

```

SAMPLE          DEC. & VT
date    Apr 16 2010    dfrq    125.693
solvent  cdc13         dn      C13
file    /export/home/~ dpwr    30
vnmr1/vnmrsys/data/~ dof     0
/PMK/PMK-02-365/H/~ dm      nnn
          fid      dmm      c
ACQUISITION
sfrq    499.830      dseq
tn      H1          dres    1.0
at      3.000      homo
np      48000      PROCESSING
sw      8000.0     wtfile
fb      not used   proc     ft
bs      4          fn      not used
tpwr    58        math    f
pw      4.8
d1      1.000     werr    react
tof     499.7     wexp    procplot
nt      4         wbs
ct      4         wnt    wft
alock   y
gain    not used
          FLAGS
il      n
in      n
dp      y
hs      nn
          DISPLAY
sp      -250.1
wp      5248.0
vs      100
sc      0
wc      210
hzmm    24.99
is      360.45
rf1     4637.9
rfp     3618.7
th      2
ins     100.000
nm      cdc  ph
    
```

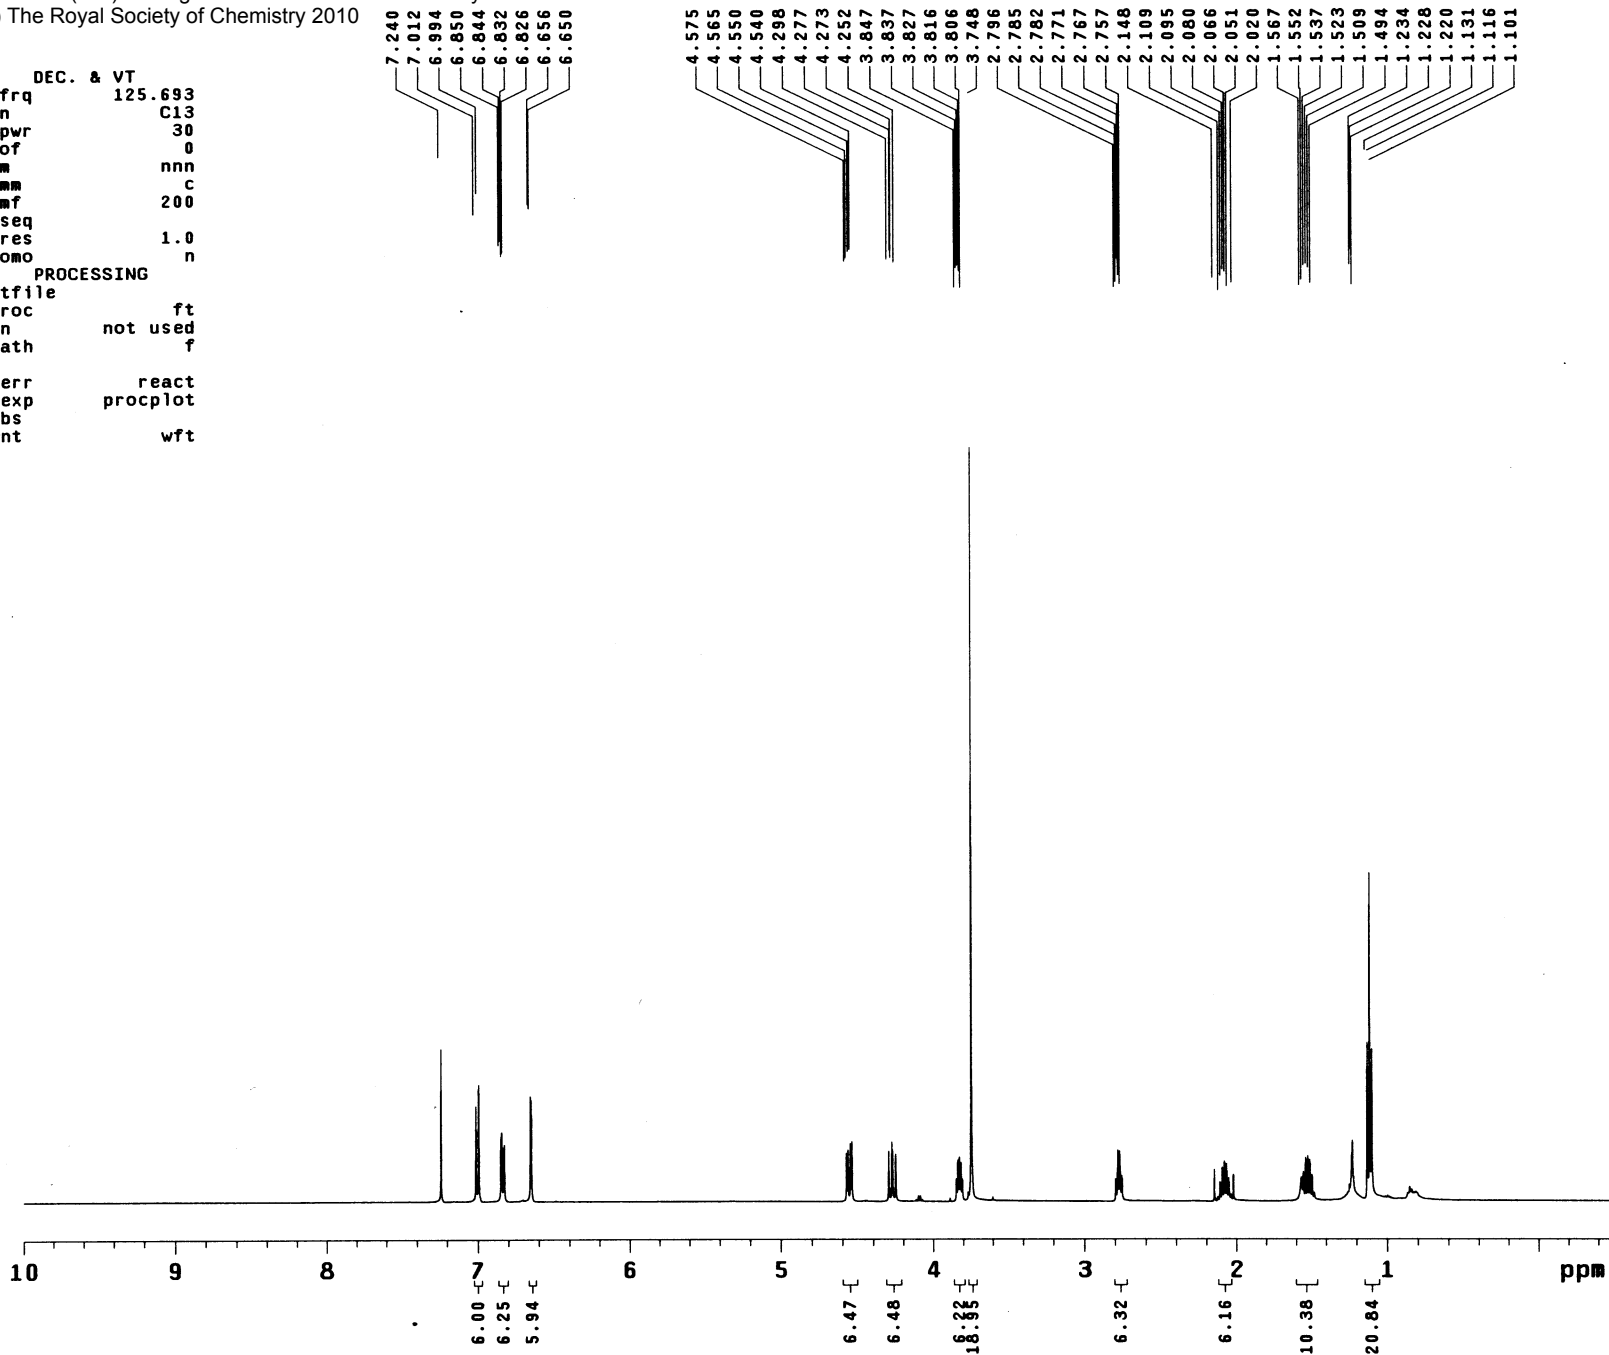

Fig S32. <sup>13</sup>C NMR (CDCl<sub>3</sub>, 125 MHz) of compound 3c

PMK-02-365  
 exp24 s2pul  
 # Supplementary Material (ESI) for Organic & Biomolecular Chemistry  
 # This journal is (c) The Royal Society of Chemistry 2010

```

SAMPLE          DEC. & VT
date Apr 16 2010 dfrq      499.829
solvent cdc13      dn       H1
file /export/home/~ dpwr      39
vnmr1/vnmrsys/data~ dof       0
/PMK/PMK-02-365/C.~ dm       yyv
                      fid      dmm      w
ACQUISITION      dmf      11905
sfrq      125.696 dseq
tn         C13     dres      1.0
at         1.000  homo      n
np         62894   PROCESSING
sw         31446.5 lb       1.00
fb         not used wtfile
bs         16      proc
ss         2       fn       not used
tpwr       54     math      f
pw         4.0
d1         1.000  werr      react
tof        2512.2 wexp     procplot
nt         1024  wbs      testsn
ct         1024  wnt
alock      y
gain       not used
          FLAGS
il         n
in         n
dp         y
hs         nn
          DISPLAY
sp        -1257.0
wp        28906.3
vs         75
sc         0
wc         210
hzmm      137.65
is         500.00
rfl       10982.5
rfp       9677.5
th         4
ins       100.000
nm cdc ph
  
```

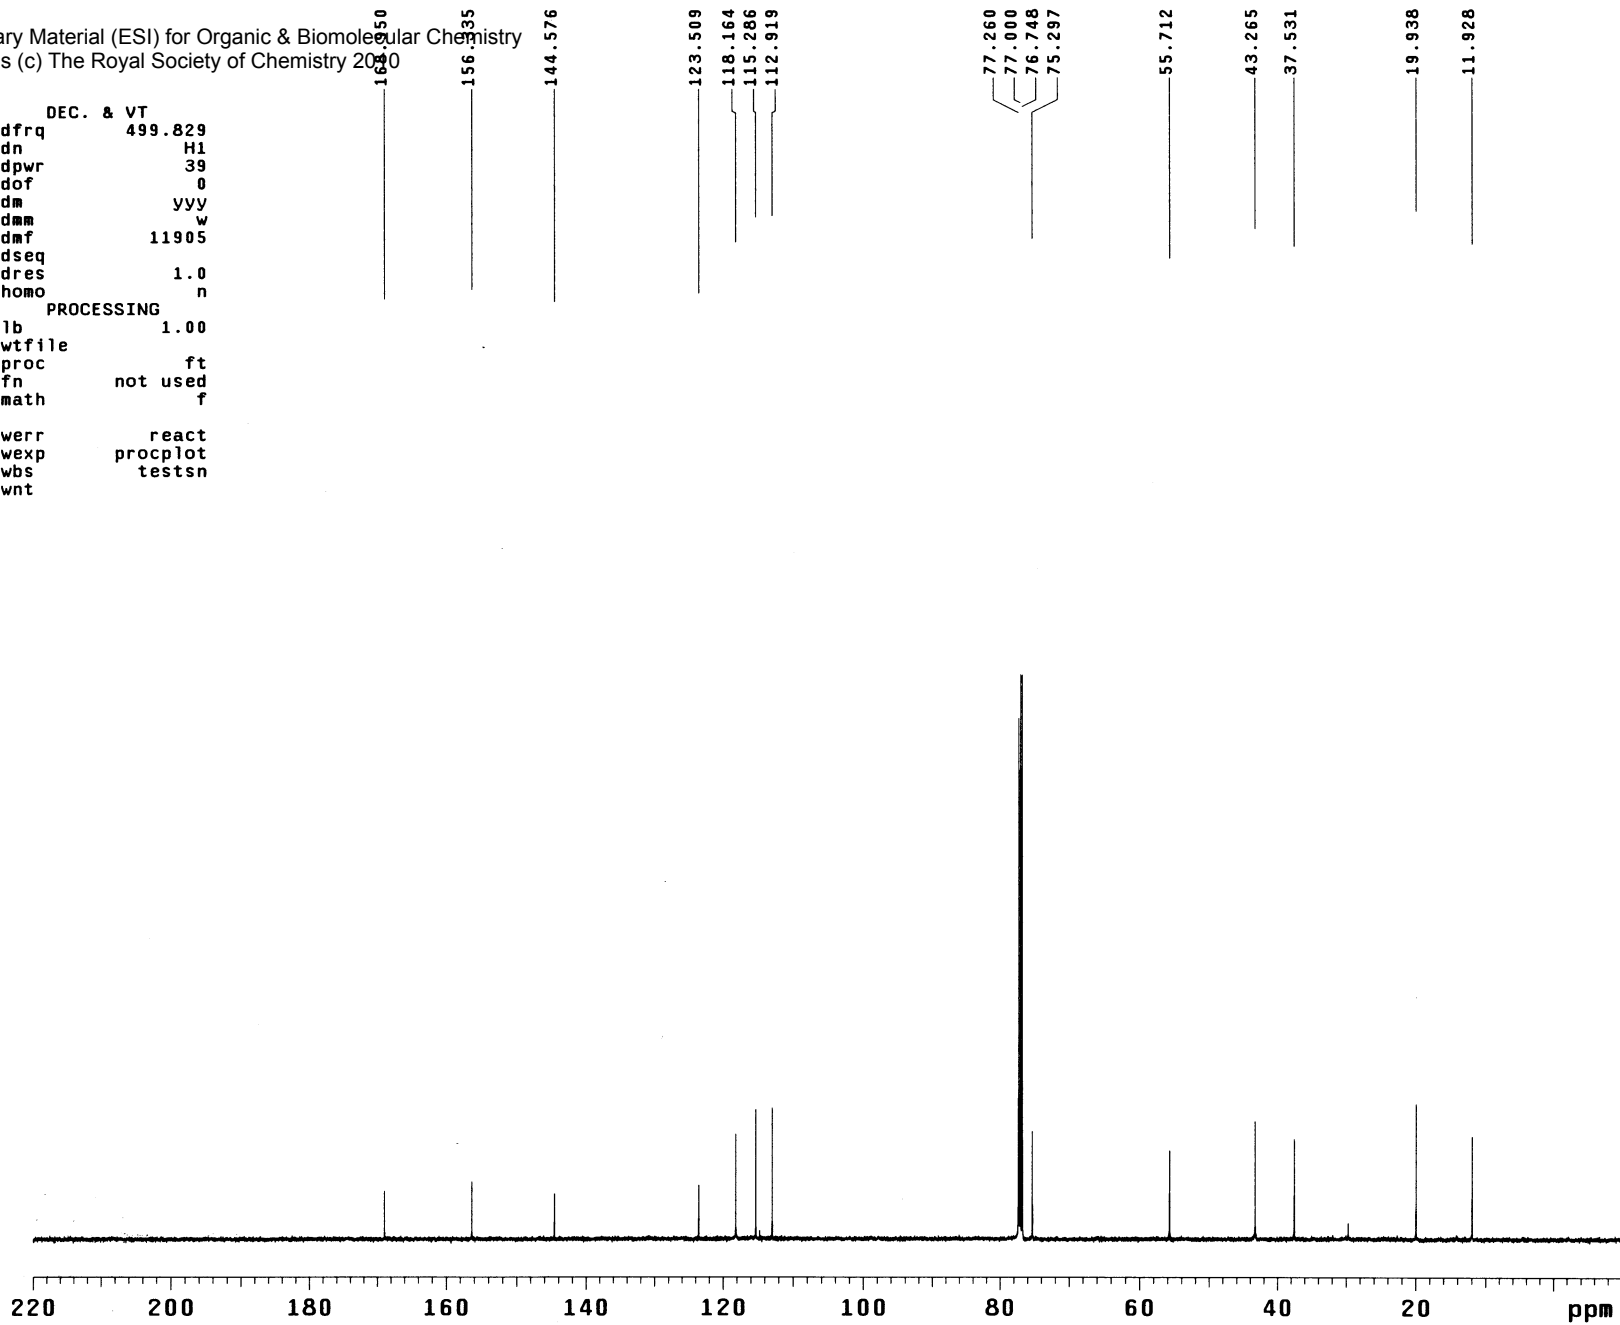



Fig S33 DEPT of compound 3c

PMK-02-#55 Supplementary Material (ESI) for Organic & Biomolecular Chemistry  
 # This journal is (c) The Royal Society of Chemistry 2010

exp25 DEPT

| SAMPLE      |             | DEPT       |          | ACQUISITION ARRAYS |      |
|-------------|-------------|------------|----------|--------------------|------|
| date        | Apr 16 2010 | j1xh       | 140.0    | array              | mult |
| solvent     | cdcl3       | mult       | arrayed  | arraydim           | 4    |
| sample      | undefined   | SPECIAL    |          |                    |      |
| ACQUISITION |             | temp       | not used | i                  | mult |
| sw          | 31446.5     | gain       | 28       | 1                  | 0.5  |
| at          | 1.000       | spin       | 0        | 2                  | 1    |
| np          | 62894       | PROCESSING |          | 3                  | 1    |
| bs          | 16          | lb         | 1.00     | 4                  | 1.5  |
| ss          | -4          | fn         | not used |                    |      |
| d1          | 1.000       | SPECTRUM   |          |                    |      |
| nt          | 1024        | wp         | 28906.3  |                    |      |
| ct          | 1024        | sp         | -1257.0  |                    |      |
| TRANSMITTER |             | rp         | 46.1     |                    |      |
| tn          | C13         | lp         | 206.7    |                    |      |
| tof         | 2512.2      | cdc        | ph       |                    |      |
| tpwr        | 54          | REFERENCE  |          |                    |      |
| pw          | 11.500      | rfl        | 1305.0   |                    |      |
| DECOUPLER   |             | rfp        | 0        |                    |      |
| dn          | H1          | PLOT       |          |                    |      |
| dof         | 0           | wc         | 210      |                    |      |
| dpwr        | 39          | sc         | 0        |                    |      |
| dm          | nny         | vs         | 200      |                    |      |
| dmm         | ccw         | hzmm       | 137.65   |                    |      |
| dmf         | 11905       | th         | 68       |                    |      |
| pp1v1       | 51          |            |          |                    |      |
| pp          | 28.000      |            |          |                    |      |

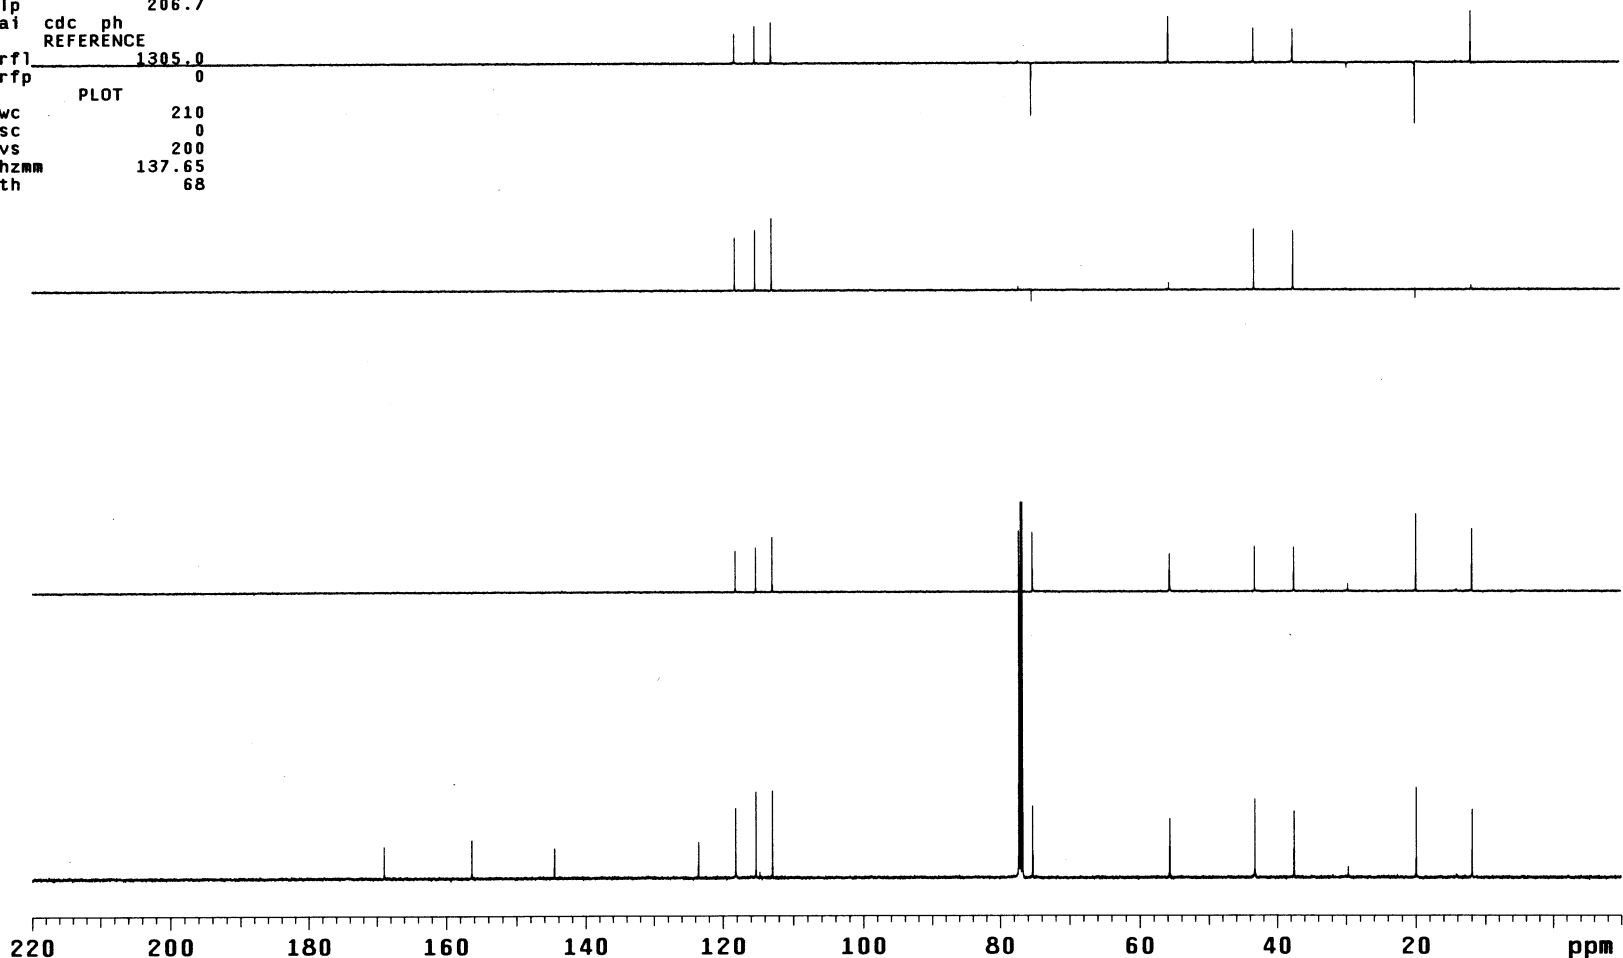

Fig S34. HSQC of compound 3c

# Supplementary Material (ESI) for Organic & Biomolecular Chemistry  
 # This journal is (c) The Royal Society of Chemistry 2010  
 exp28 gHSQC

| SAMPLE           | FLAGS         | ACQUISITION | ARRAYS   |
|------------------|---------------|-------------|----------|
| date Apr 16 2010 | hs            | n           | array    |
| solvent cdc13    | sspul         | y           | arraydim |
| sample undefined | PFGflg        | y           | phase    |
| ACQUISITION      | hsglv1        | 1003        | i        |
| sw 4001.6        | SPECIAL       | 1           | phase    |
| at 0.128         | temp          | not used    | 2        |
| np 1024          | gain          | 20          |          |
| fb not used      | spin          | 0           |          |
| ss 32            | GRADIENTS     |             |          |
| d1 1.000         | gzlv11        | 1003        |          |
| nt 8             | gt1           | 0.002000    |          |
| 2D ACQUISITION   | gzlv13        | 505         |          |
| sw1 21367.5      | gt3           | 0.001000    |          |
| ni 128           | gstab         | 0.000500    |          |
| phase arrayed    | F2 PROCESSING |             |          |
| TRANSMITTER      | gf            | 0.059       |          |
| tn H1            | gfs           | not used    |          |
| sfrq 499.829     | fn            | 1024        |          |
| tof -499.9       | F1 PROCESSING |             |          |
| tpwr 58          | gf1           | 0.006       |          |
| pw 11.100        | gfs1          | not used    |          |
| DECOUPLER        | procl         | 1           |          |
| dn C13           | fn1           | 2048        |          |
| dof -2515.2      | DISPLAY       |             |          |
| dm nny           | sp            | 353.8       |          |
| dmm ccp          | wp            | 3431.1      |          |
| dmf 32258        | sp1           | 857.7       |          |
| dpwr 36          | wpl           | 14585.8     |          |
| pxlv1 52         | rfl           | 1886.8      |          |
| pxw 14.300       | rfp           | 1873.4      |          |
| HSQC             | rf11          | 8293.6      |          |
| j1xh 140.0       | rfp1          | 7002.0      |          |
| nullflg y        | PLOT          |             |          |
| mult 2           | wc            | 150.0       |          |
|                  | sc            | 6.2         |          |
|                  | wc2           | 116.2       |          |
|                  | sc2           | 0           |          |
|                  | vs            | 100         |          |
|                  | th            | 3           |          |
|                  | ai cdc ph     |             |          |

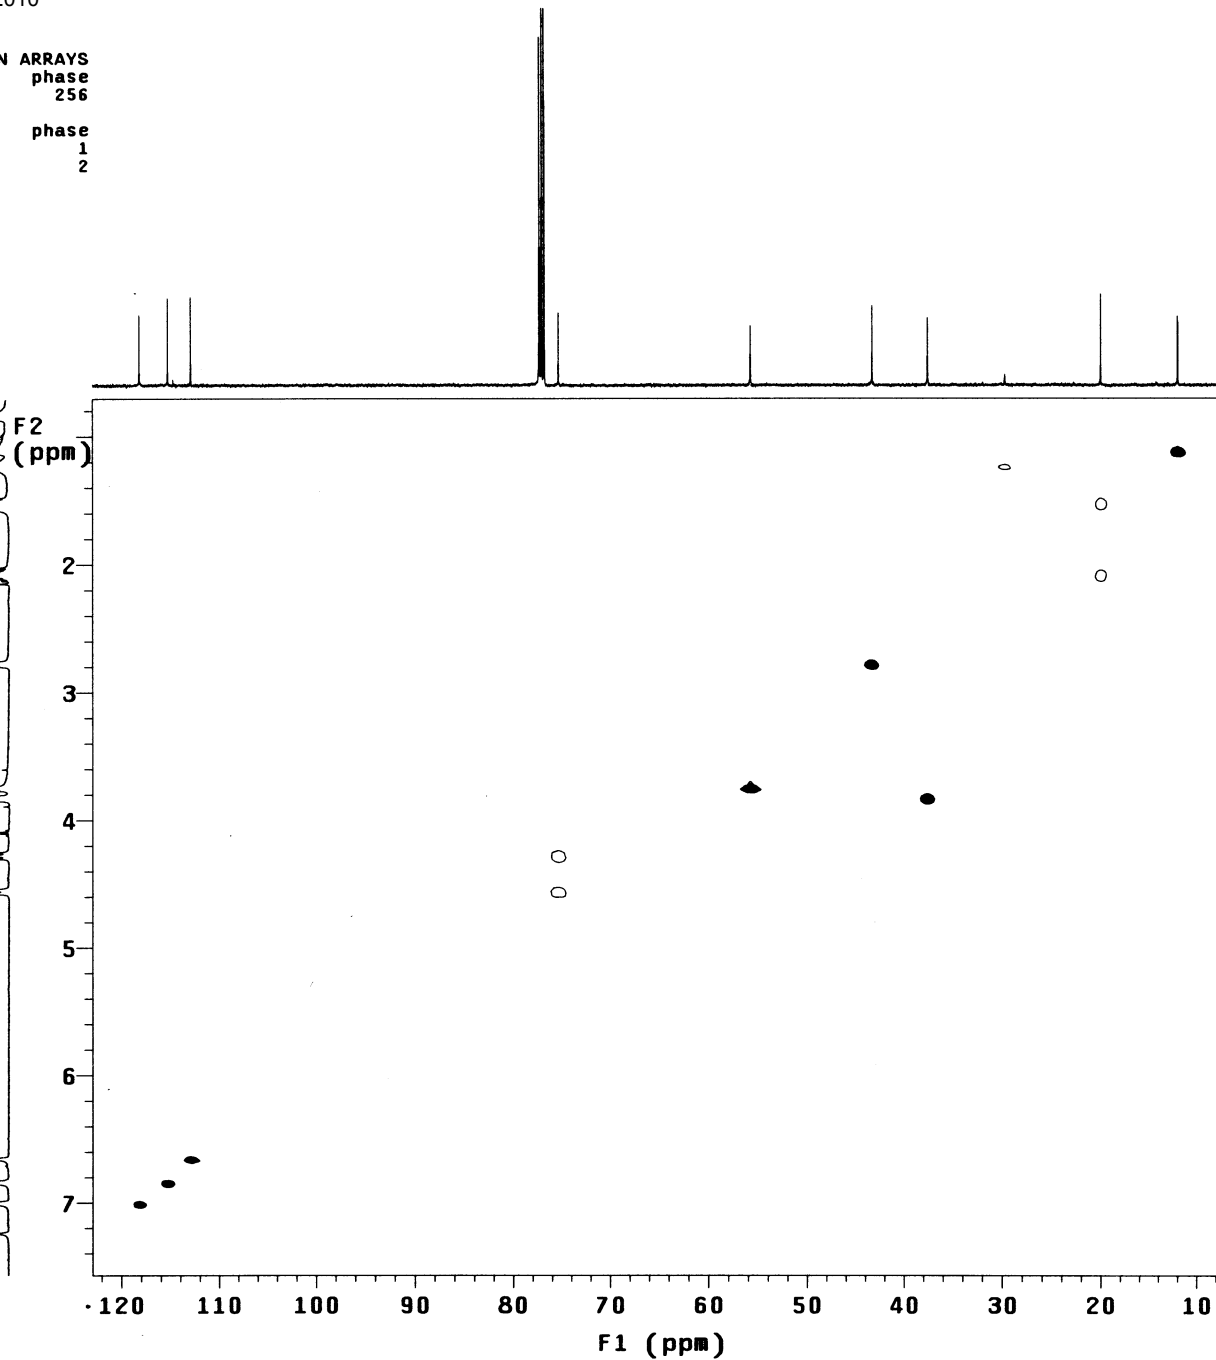

Fig S35. COSY of compound 3c

# Supplementary Material (ESI) for Organic & Biomolecular Chemistry  
 PMK-02-#65 This journal is (c) The Royal Society of Chemistry 2010

exp26 gCOSY

|                |           |               |          |      |
|----------------|-----------|---------------|----------|------|
| date           | SAMPLE    | Apr 16 2010   | hs       | nn   |
| solvent        | cdc13     |               | sspul    | n    |
| sample         | undefined |               | hsglv1   | 1003 |
| ACQUISITION    |           |               |          |      |
| sw             | 4001.6    | temp          | not used |      |
| at             | 0.128     | gain          | 28       |      |
| np             | 1024      | spin          | 0        |      |
| fb             | not used  | F2 PROCESSING |          |      |
| ss             | 16        | sb            | -0.064   |      |
| d1             | 1.000     | sbs           | not used |      |
| nt             | 8         | fn            | 1024     |      |
| 2D ACQUISITION |           |               |          |      |
| sw1            | 4001.6    | sb1           | -0.032   |      |
| ni             | 128       | sbs1          | not used |      |
| TRANSMITTER    |           |               |          |      |
| tn             | H1        | fn1           | 1024     |      |
| sfrq           | 499.829   | DISPLAY       |          |      |
| tof            | -499.9    | sp            | 277.9    |      |
| tpwr           | 58        | wp            | 3478.0   |      |
| pw             | 11.100    | sp1           | 272.1    |      |
| GRADIENTS      |           |               |          |      |
| gzlv1          | 1003      | wp1           | 3478.0   |      |
| gt1            | 0.001000  | rfl           | 1892.5   |      |
| gstab          | 0.000500  | rfl1          | 1873.4   |      |
| DECOUPLER      |           |               |          |      |
| dn             | C13       | rfl1          | 1890.4   |      |
| dm             | nnn       | rfl1          | 1873.3   |      |
| PLOT           |           |               |          |      |
|                |           | wc            | 155.0    |      |
|                |           | sc            | 10.0     |      |
|                |           | wc2           | 155.0    |      |
|                |           | sc2           | 0        |      |
|                |           | vs            | 100      |      |
|                |           | th            | 6        |      |
|                | ai        | cdc           | av       |      |

F2 (ppm)

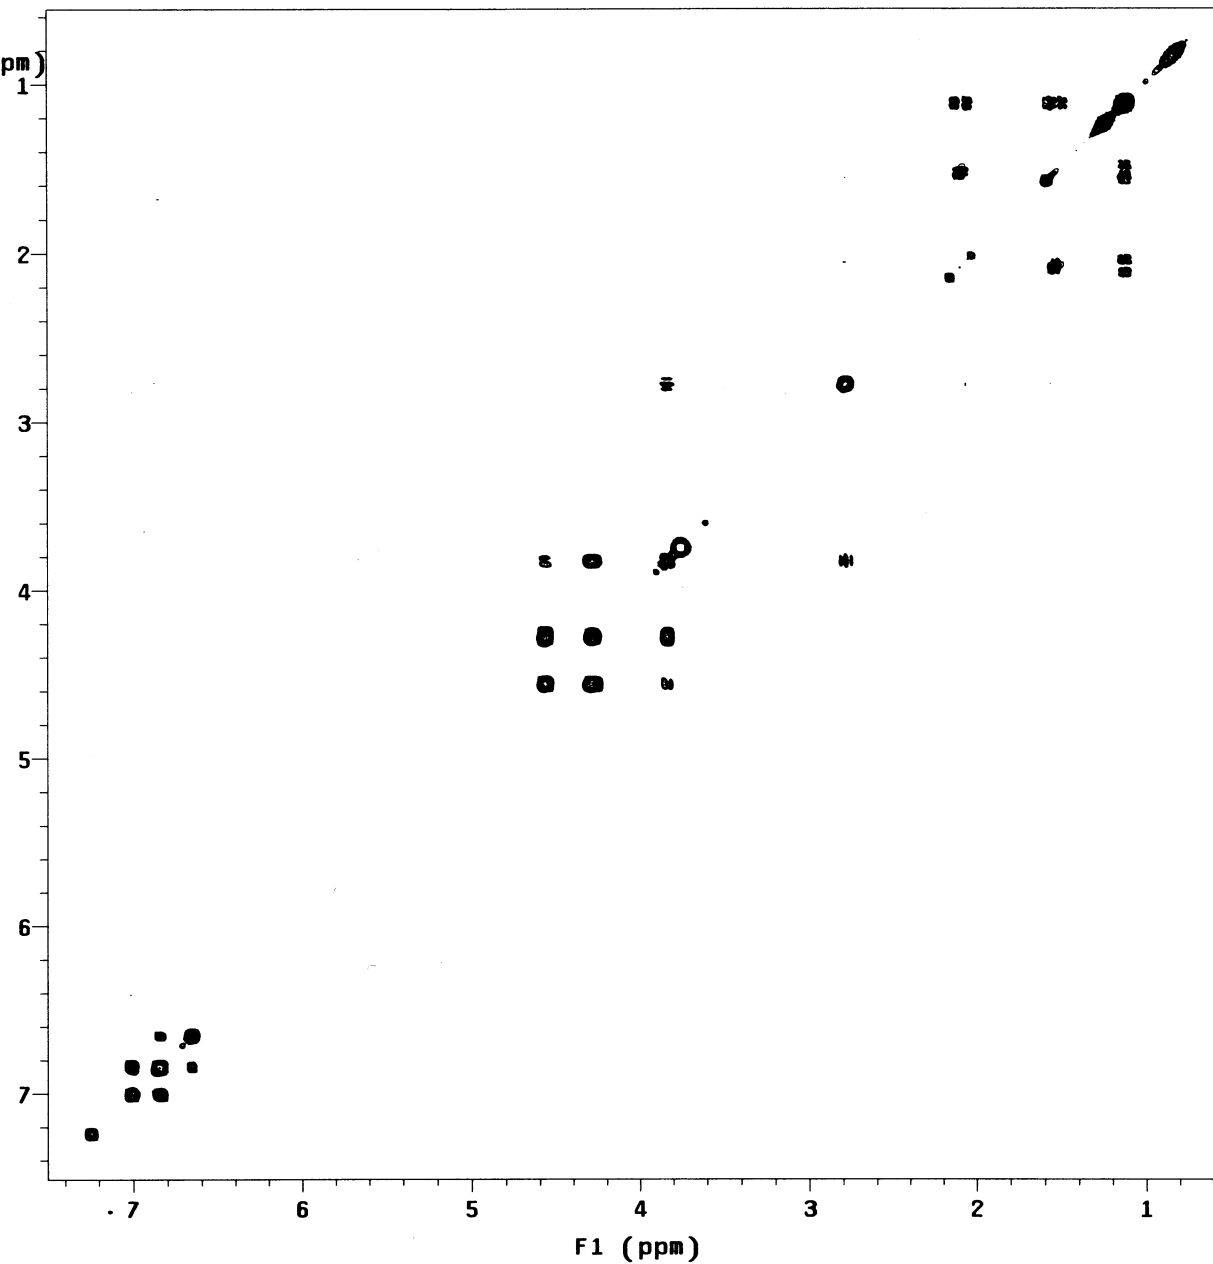

Fig S36. NOESY of compound 3c

# Supplementary Material (ESI) for Organic & Biomolecular Chemistry  
 PMK-02-365 # This journal is (c) The Royal Society of Chemistry 2010  
 exp27 NOESY

| SAMPLE         |             | FLAGS         |          |
|----------------|-------------|---------------|----------|
| date           | Apr 16 2010 | hs            | n        |
| solvent        | cdc13       | sspul         | y        |
| sample         | undefined   | PFGflg        | y        |
| ACQUISITION    |             | hsglvt        | 1003     |
| sw             | 4001.6      | SPECIAL       |          |
| at             | 0.128       | temp          | not used |
| np             | 1024        | gain          | 28       |
| fb             | not used    | spin          | 0        |
| ss             | 32          | F2 PROCESSING |          |
| d1             | 1.000       | gt            | 0.059    |
| nt             | 8           | gfs           | not used |
| 2D ACQUISITION |             | fn            | 1024     |
| sw1            | 4001.6      | F1 PROCESSING |          |
| ni             | 200         | gf1           | 0.046    |
| TRANSMITTER    |             | gfs1          | not used |
| tn             | H1          | proc1         | lp       |
| sfrq           | 499.829     | fn1           | 1024     |
| tof            | -499.9      | DISPLAY       |          |
| tpwr           | 58          | sp            | 293.0    |
| pw             | 11.100      | wp            | 3423.2   |
| NOESY          |             | sp1           | 293.7    |
| mix            | 0.600       | wp1           | 3423.2   |
| PRESATURATION  |             | rfl           | 1893.0   |
| satmode        | nnnn        | rfp           | 1873.4   |
| satpwr         | 0           | rfl1          | 1892.3   |
| satdly         | 0           | rfp1          | 1873.3   |
| satfrq         | 0           | PLOT          |          |
| DECOUPLER      |             | wc            | 155.0    |
| dn             | C13         | sc            | 10.0     |
| dm             | nnn         | wc2           | 155.0    |
|                |             | sc2           | 0        |
|                |             | vs            | 100      |
|                |             | th            | 2        |
|                |             | al            | ph       |

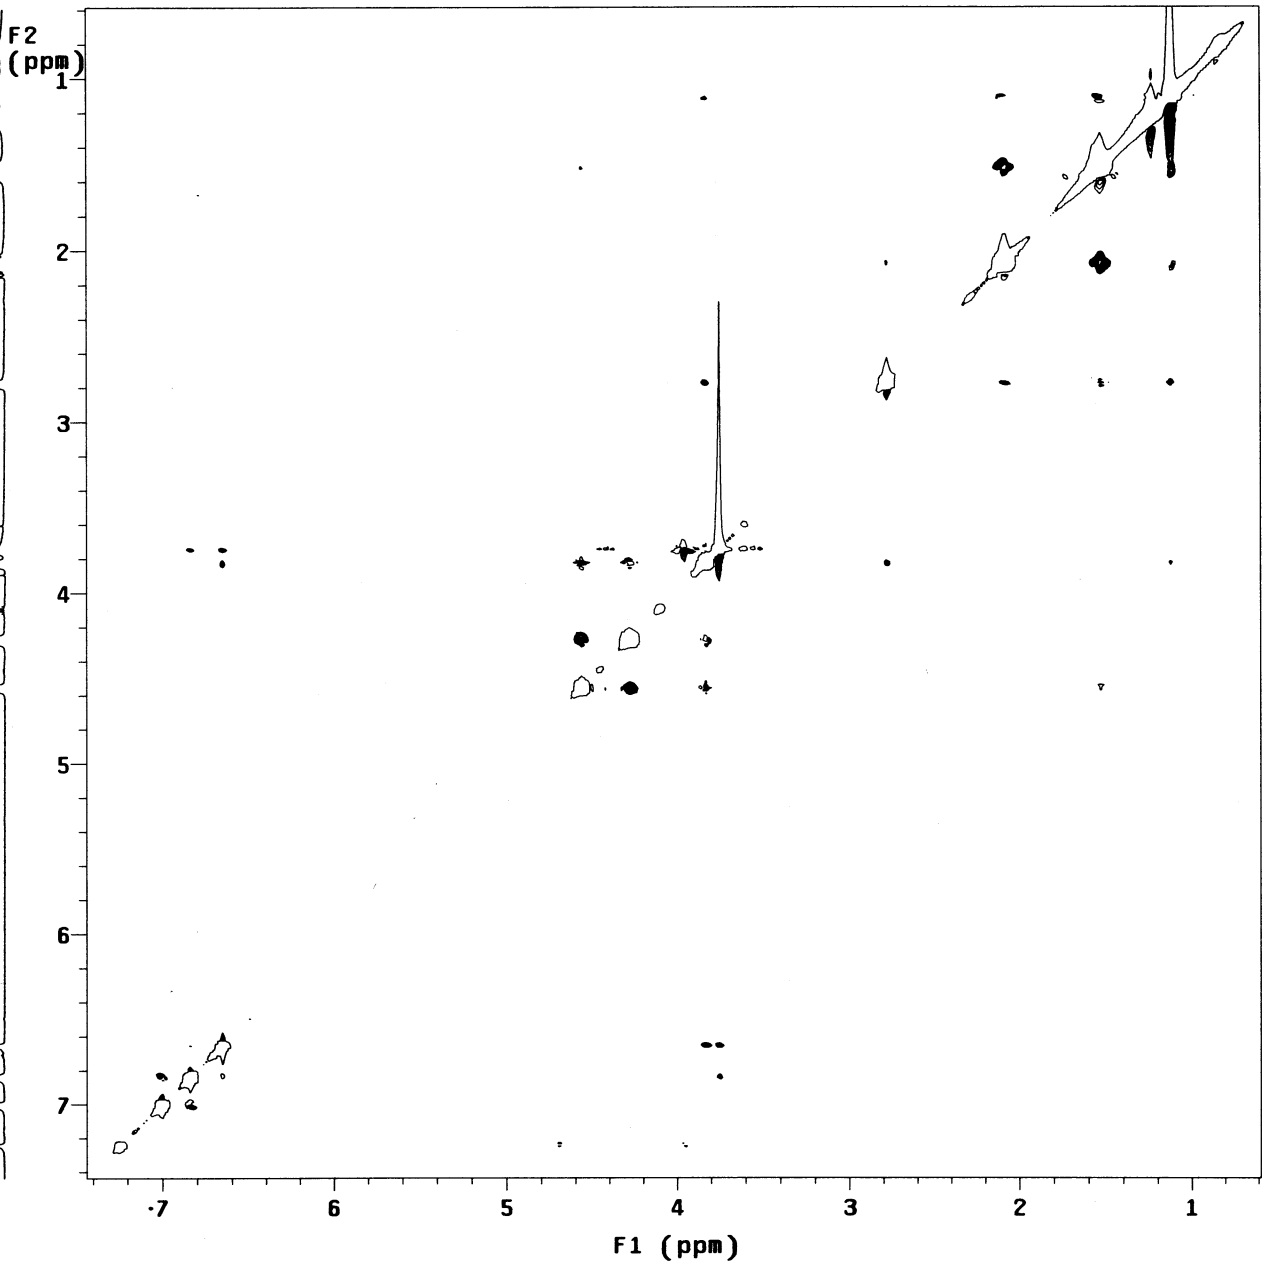

Fig S37. <sup>1</sup>H NMR (CDCl<sub>3</sub>, 500 MHz) of compound 3d

# Supplementary Material (ESI) for Organic & Biomolecular Chemistry

# This journal is (c) The Royal Society of Chemistry

exp3 s2pu1

```

SAMPLE
date Apr 28 2010 dfrq 125.693
solvent cdc13 dn C13
file exp dpwr 30
ACQUISITION dof 0
sfrq 499.830 dm nnn
tn H1 dnm c
at 3.000 dmf 200
np 48000 dseq
sw 8000.0 dres 1.0
fb not used homo n
bs 4 temp 20.0
tpwr 58
pw 4.8 wtfile
d1 1.000 proc ft
tof 499.7 fn not used
nt 4 math f
ct 4
alock y werr react
gain not used wexp procplot
FLAGS
il n wnt
in n
dp y
hs nn
DISPLAY
sp -250.1
wp 5248.0
vs 50
sc 0
wc 210
hzmm 24.99
is 252.84
rfl 4637.7
rfp 3618.7
th 4
ins 100.000
nm cdc ph
    
```

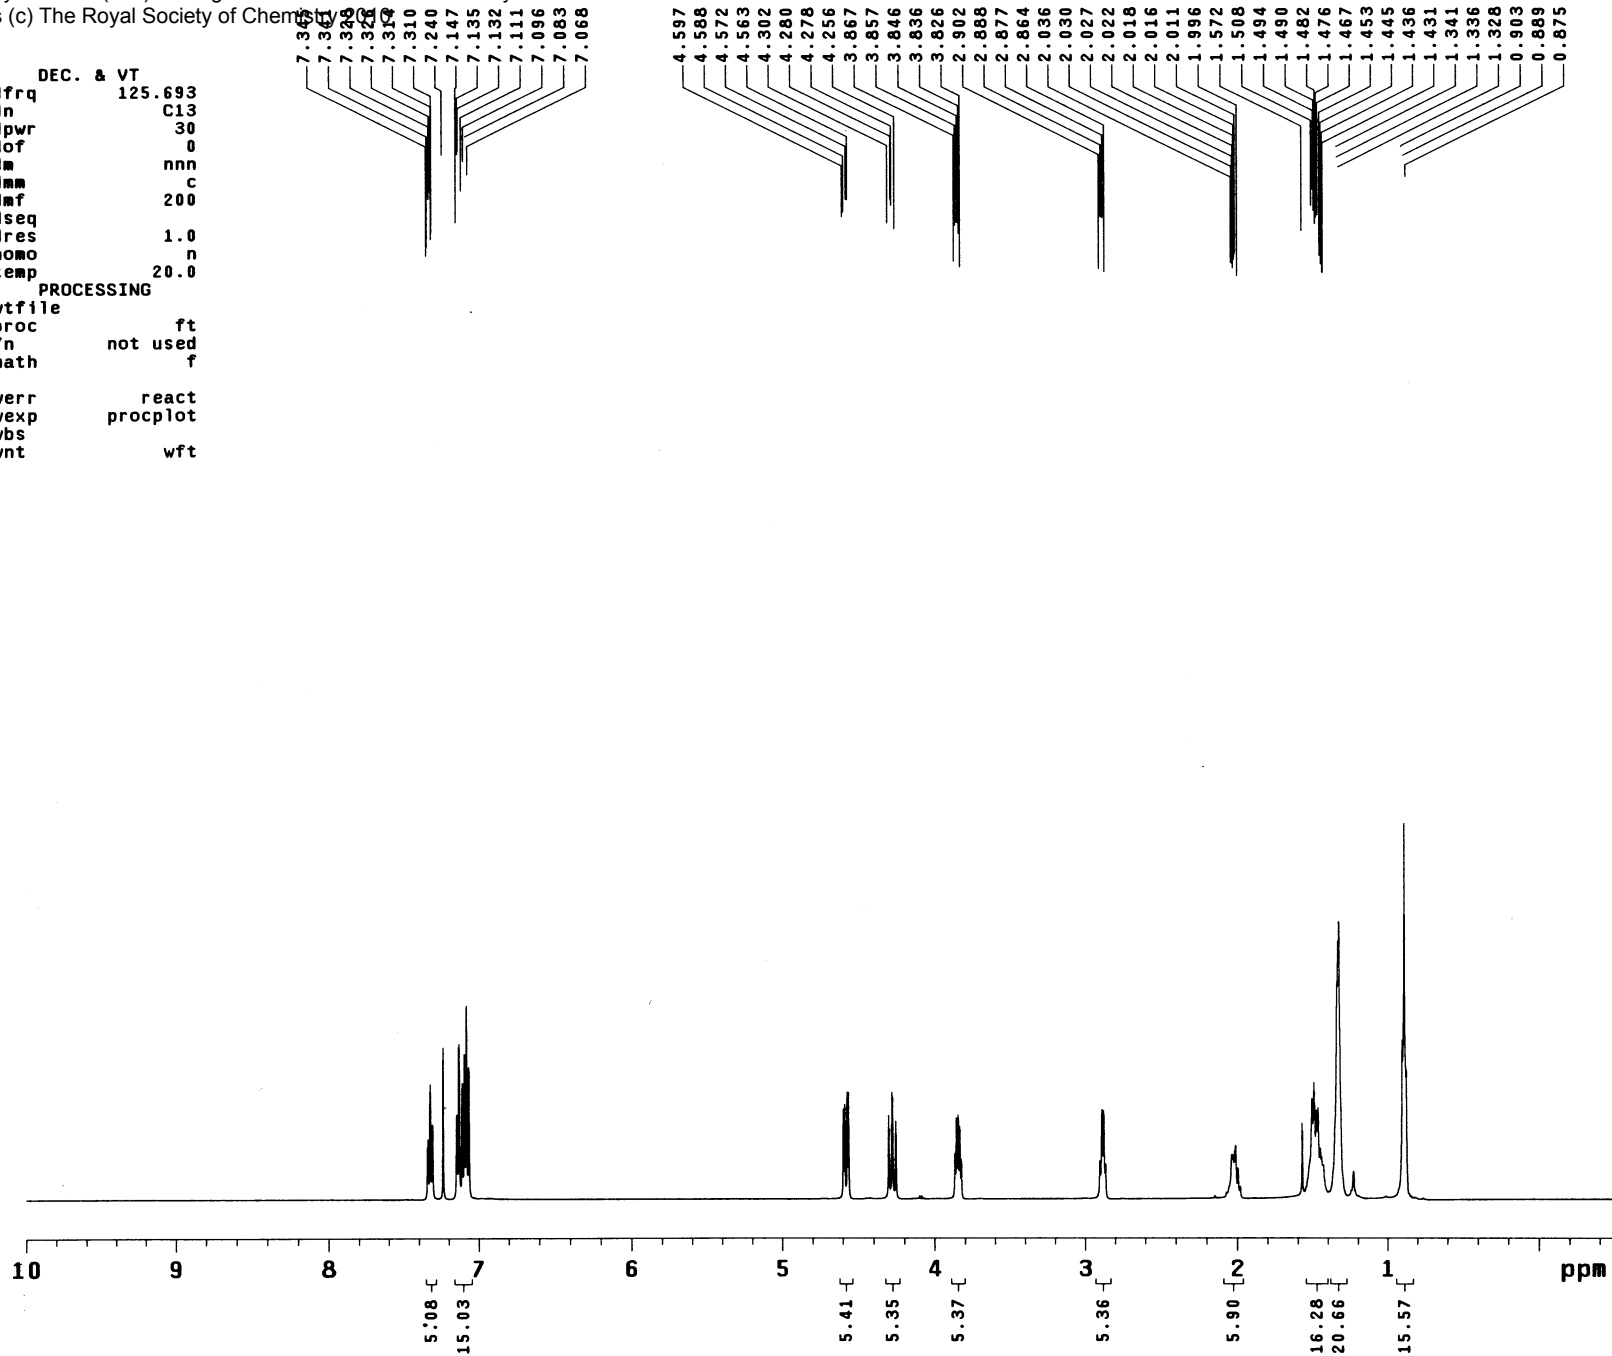

Fig S38. <sup>13</sup>C NMR (CDCl<sub>3</sub>, 125 MHz) of compound 3d

# Supplementary Material (ESI) for Organic & Biomolecular Chemistry  
 This journal is (c) The Royal Society of Chemistry 2010

exp4 s2pu1

|             |             |            |          |
|-------------|-------------|------------|----------|
| SAMPLE      |             | DEC. & VT  |          |
| date        | Apr 28 2010 | dfrq       | 499.829  |
| solvent     | cdc13       | dn         | H1       |
| file        | exp         | dpwr       | 39       |
| ACQUISITION |             | dof        | 0        |
| sfrq        | 125.696     | dm         | yyy      |
| tn          | C13         | dmm        | w        |
| at          | 1.000       | dmf        | 11905    |
| np          | 62894       | dseq       |          |
| sw          | 31446.5     | dres       | 1.0      |
| fb          | not used    | homo       | n        |
| bs          | 16          | temp       | 20.0     |
| ss          | 2           | PROCESSING |          |
| tpwr        | 54          | lb         | 1.00     |
| pw          | 4.0         | wtfile     |          |
| d1          | 1.000       | proc       | ft       |
| tof         | 2512.2      | fn         | not used |
| nt          | 1024        | math       | f        |
| ct          | 1024        |            |          |
| alock       | y           | werr       | react    |
| gain        | not used    | wexp       | procplot |
| FLAGS       |             | wbs        | testsn   |
| il          | n           | wnt        |          |
| in          | n           |            |          |
| dp          | y           |            |          |
| hs          | nn          |            |          |
| DISPLAY     |             |            |          |
| sp          | -1257.0     |            |          |
| wp          | 28906.3     |            |          |
| vs          | 50          |            |          |
| sc          | 0           |            |          |
| wc          | 210         |            |          |
| hzmm        | 137.65      |            |          |
| is          | 500.00      |            |          |
| rfl         | 10984.4     |            |          |
| rfp         | 9677.5      |            |          |
| th          | 7           |            |          |
| ins         | 100.000     |            |          |
| nm          | cdc ph      |            |          |

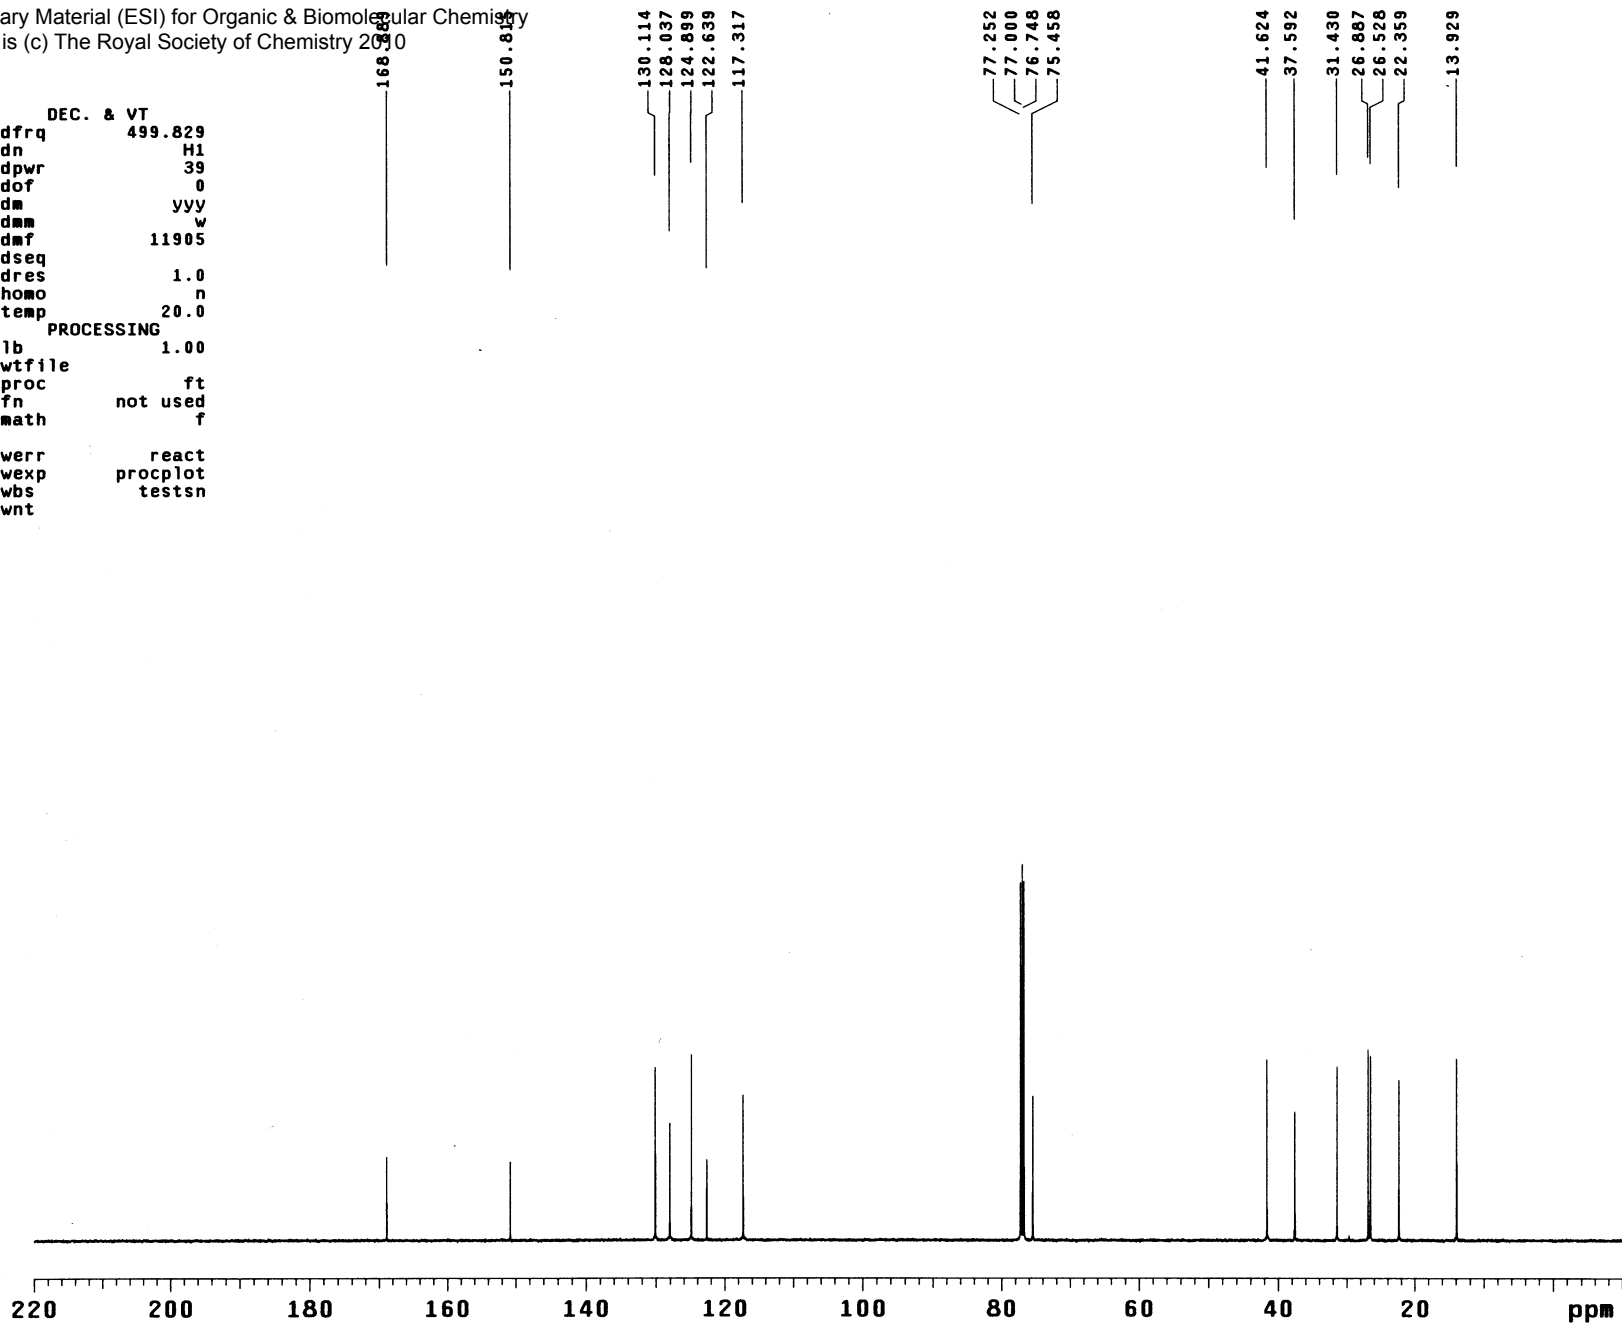

Fig S39. DEPT of compound 3d

PMK-02-368

# Supplementary Material (ESI) for Organic & Biomolecular Chemistry

exp5 DEPT# This journal is (c) The Royal Society of Chemistry 2010

| SAMPLE      |             | DEPT        | ACQUISITION ARRAYS |            |
|-------------|-------------|-------------|--------------------|------------|
| date        | Apr 28 2010 | j1xh 140.0  | array              | mult       |
| solvent     | cdcl3       | mult        | arrayed            | arraydim 3 |
| sample      | undefined   | SPECIAL     |                    |            |
| ACQUISITION |             | temp 20.0   | i                  | mult       |
| sw          | 31446.5     | gain 22     | 1                  | 0.5        |
| at          | 1.000       | spin 0      | 2                  | 1          |
| np          | 62894       | PROCESSING  | 3                  | 1.5        |
| bs          | 16          | lb 1.00     |                    |            |
| ss          | -4          | fn not used |                    |            |
| d1          | 1.000       | SPECTRUM    |                    |            |
| nt          | 1024        | wp 28906.3  |                    |            |
| ct          | 1024        | sp -1257.0  |                    |            |
| TRANSMITTER |             | rp 46.8     |                    |            |
| tn          | C13         | lp 187.2    |                    |            |
| tof         | 2512.2      | ai cdc ph   |                    |            |
| tpwr        | 54          | REFERENCE   |                    |            |
| pw          | 11.500      | rfl 1306.9  |                    |            |
| DECOUPLER   |             | rpf 0       |                    |            |
| dn          | H1          | PLOT        |                    |            |
| dof         | 0           | wc 210      |                    |            |
| dpwr        | 39          | sc 0        |                    |            |
| dm          | nny         | vs 1000     |                    |            |
| dmm         | ccw         | hzmm 137.65 |                    |            |
| dmf         | 11905       | th 68       |                    |            |
| pp1v1       | 51          |             |                    |            |
| pp          | 28.000      |             |                    |            |

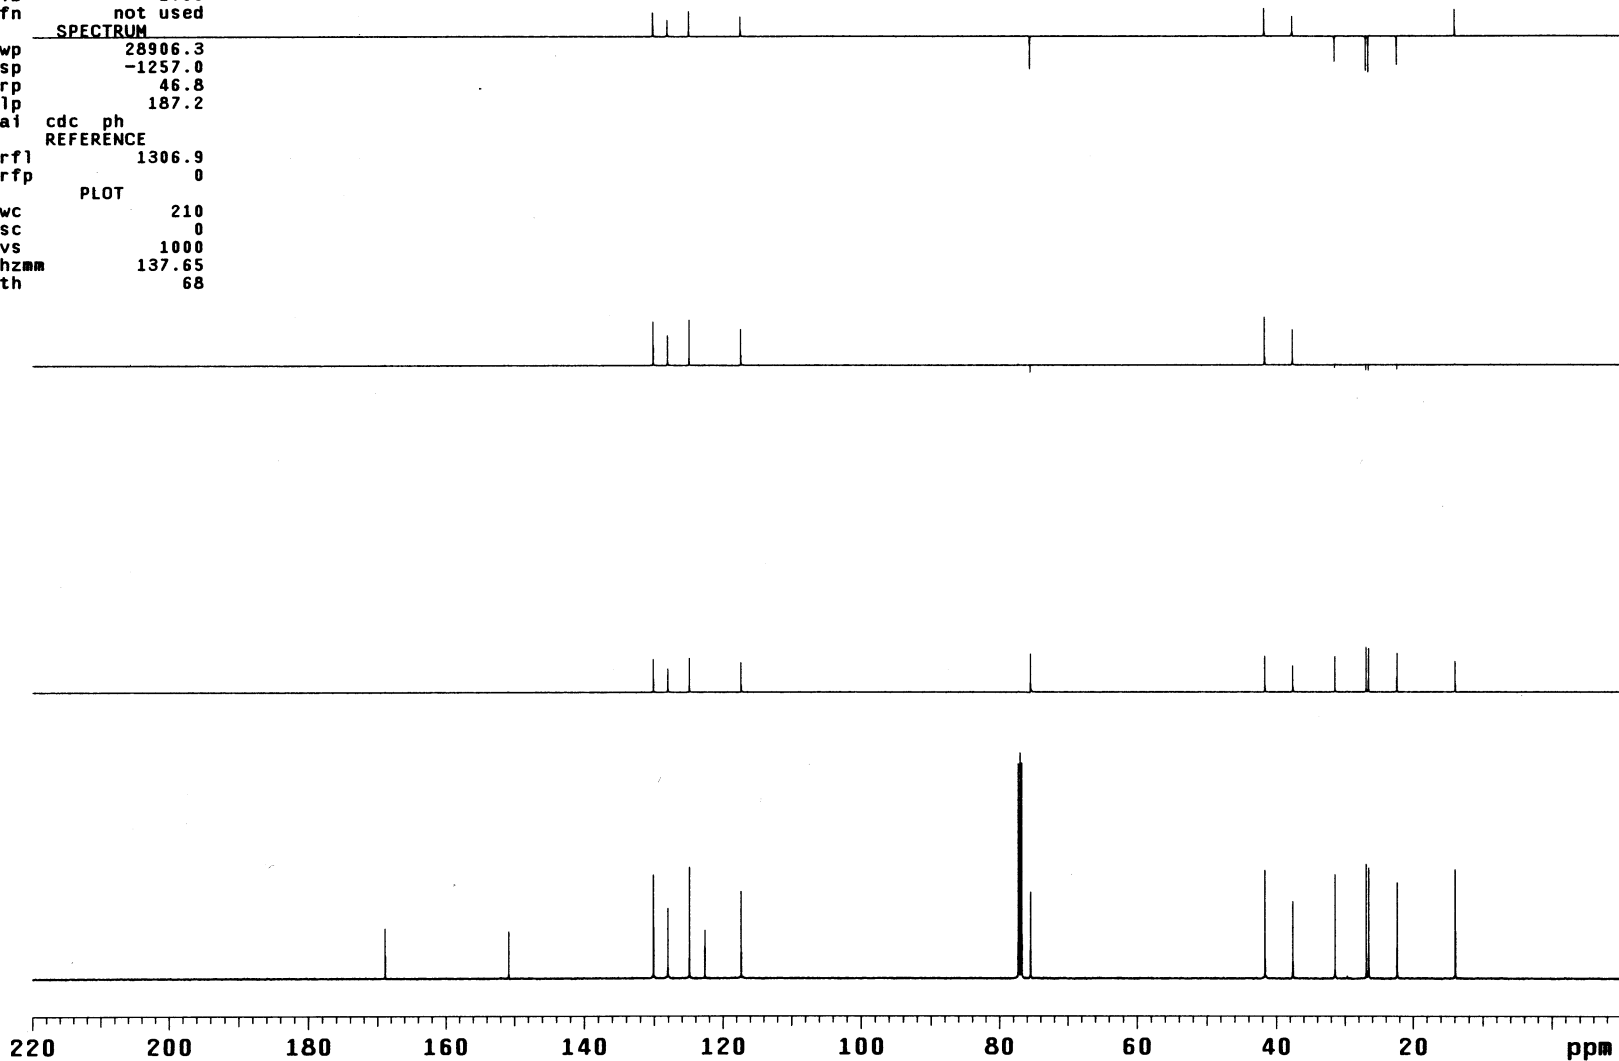

Fig S40. HSQC of compound 3d

PMK-02-#63 Supplementary Material (ESI) for Organic & Biomolecular Chemistry

# This journal is (c) The Royal Society of Chemistry 2010

exp8 gHSQC

| SAMPLE         |             | FLAGS         |          | ACQUISITION ARRAYS |       |
|----------------|-------------|---------------|----------|--------------------|-------|
| date           | Apr 28 2010 | hs            | n        | array              | phase |
| solvent        | cdc13       | sspu1         | y        | arraydim           | 256   |
| sample         | undefined   | PFGflg        | y        |                    |       |
| ACQUISITION    | 4490.3      | hsglv1        | 1003     | 1                  | phase |
| sw             | 0.228       | SPECIAL       |          | 1                  | 1     |
| at             | 2048        | temp          | 20.0     | 2                  | 2     |
| np             | not used    | gain          | 20       |                    |       |
| fb             | 32          | spin          | 0        |                    |       |
| ss             | 1.000       | GRADIENTS     |          |                    |       |
| d1             | 16          | gzlv11        | 1003     |                    |       |
| nt             | 21367.5     | gt1           | 0.002000 |                    |       |
| 2D ACQUISITION | 128         | gzlv13        | 505      |                    |       |
| sw1            | 21367.5     | gt3           | 0.001000 |                    |       |
| ni             | 128         | gstab         | 0.000500 |                    |       |
| phase          | arrayed     | F2 PROCESSING |          |                    |       |
| TRANSMITTER    | H1          | gf            | 0.105    |                    |       |
| tn             | 499.829     | gfs           | not used |                    |       |
| sfrq           | -250.0      | fn            | 2048     |                    |       |
| tof            | 58          | F1 PROCESSING |          |                    |       |
| tpwr           | 11.100      | gf1           | 0.006    |                    |       |
| pw             | C13         | gfs1          | not used |                    |       |
| DECOUPLER      | -2515.2     | procl         | lp       |                    |       |
| dn             | nny         | fn1           | 2048     |                    |       |
| dof            | ccp         | DISPLAY       |          |                    |       |
| dm             | 32258       | sp            | 214.5    |                    |       |
| dmm            | 36          | wp            | 3696.6   |                    |       |
| dmf            | 52          | sp1           | 1102.5   |                    |       |
| dpwr           | 14.300      | wp1           | 15817.0  |                    |       |
| pwxlvl         | HSQC        | rfl           | 1935.8   |                    |       |
| pw             | 140.0       | rfl1          | 6021.8   |                    |       |
| j1xh           | y           | rfl1          | 4724.6   |                    |       |
| nullflg        | 2           | PLOT          |          |                    |       |
| mult           |             | wc            | 150.0    |                    |       |
|                |             | sc            | 6.2      |                    |       |
|                |             | wc2           | 116.2    |                    |       |
|                |             | sc2           | 0        |                    |       |
|                |             | vs            | 100      |                    |       |
|                |             | th            | 4        |                    |       |
|                |             | ai            | cdc ph   |                    |       |

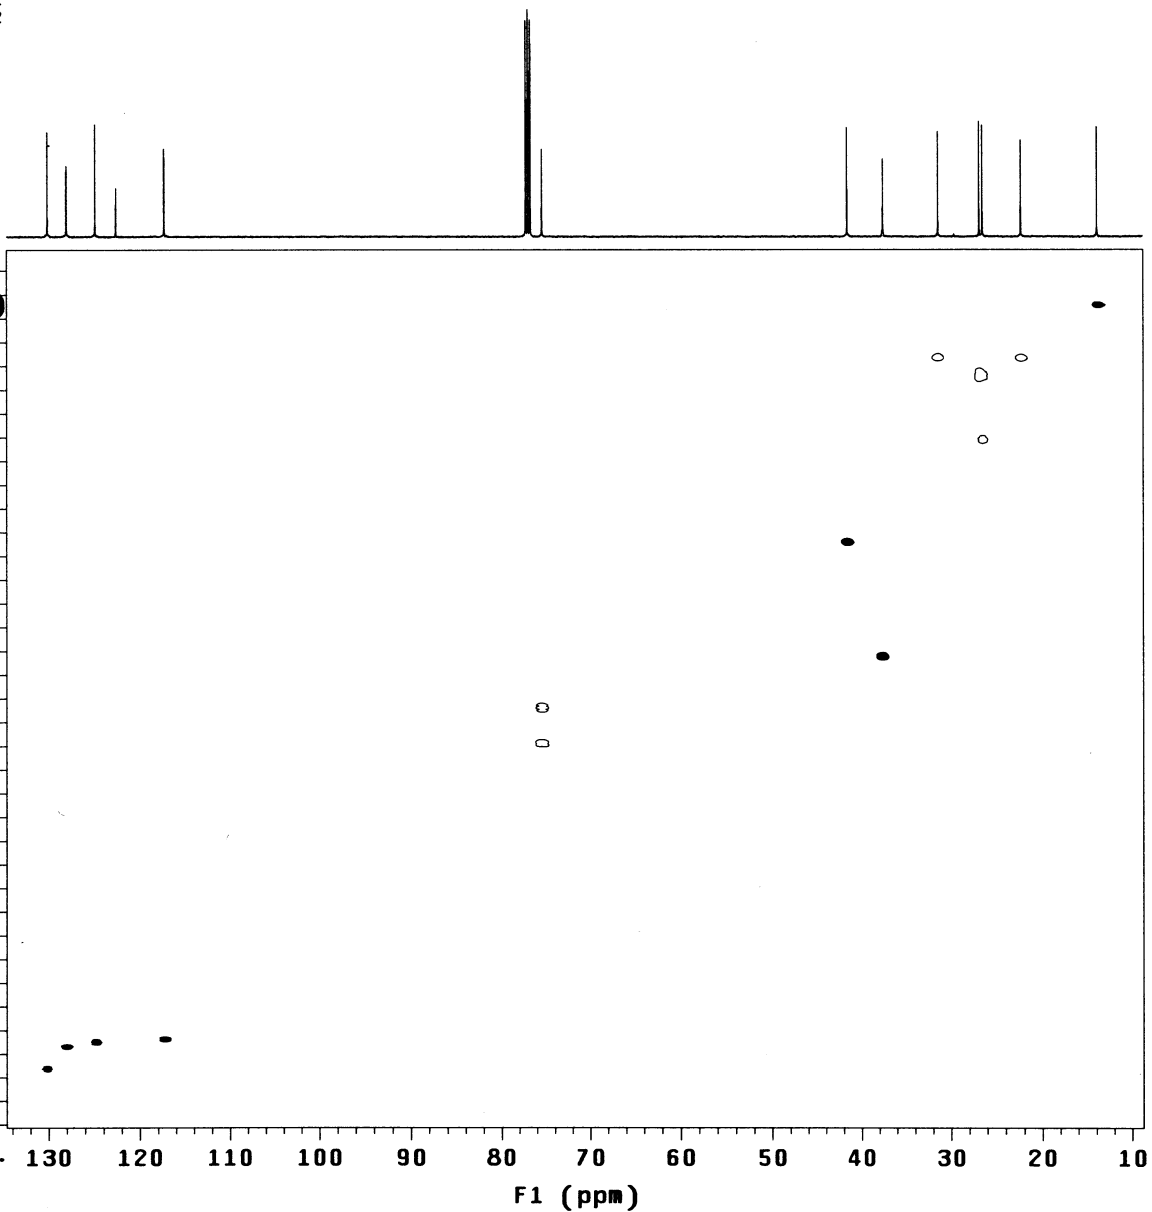



Fig S41. COSY of compound 3d

# Supplementary Material (ESI) for Organic & Biomolecular Chemistry  
 # This journal is (c) The Royal Society of Chemistry 2010

exp6 gCOSY

|                |             |         |            |
|----------------|-------------|---------|------------|
| date           | Apr 28 2010 | hs      | nn         |
| solvent        | cdcl3       | sspul   | n          |
| sample         | undefined   | hsglv1  | 1003       |
| ACQUISITION    |             | SPECIAL |            |
| sw             | 4490.3      | temp    | 20.0       |
| at             | 0.228       | gain    | 22         |
| np             | 2048        | spin    | 0          |
| fb             | not used    | F2      | PROCESSING |
| ss             | 16          | sb      | -0.114     |
| dl             | 1.000       | sbs     | not used   |
| nt             | 8           | fn      | 2048       |
| 2D ACQUISITION |             | F1      | PROCESSING |
| sw1            | 4490.3      | sb1     | -0.029     |
| ni             | 128         | sbs1    | not used   |
| TRANSMITTER    |             | procl   | lp         |
| tn             | H1          | fn1     | 2048       |
| sfrq           | 499.829     | DISPLAY |            |
| tof            | -250.0      | sp      | 265.8      |
| tpwr           | 58          | wp      | 3587.0     |
| pw             | 11.100      | sp1     | 271.4      |
| GRADIENTS      |             | wp1     | 3582.6     |
| gzlv1          | 1003        | rf1     | 1937.2     |
| gt1            | 0.001000    | rfp     | 1922.3     |
| gstab          | 0.000500    | rf11    | 1935.9     |
| DECOUPLER      |             | rfp1    | 1922.3     |
| dn             | C13         | PLOT    |            |
| dm             | nnn         | wc      | 155.0      |
|                |             | sc      | 10.0       |
|                |             | wc2     | 155.0      |
|                |             | sc2     | 0          |
|                |             | vs      | 100        |
|                |             | th      | 9          |
|                |             | ai      | cdc av     |

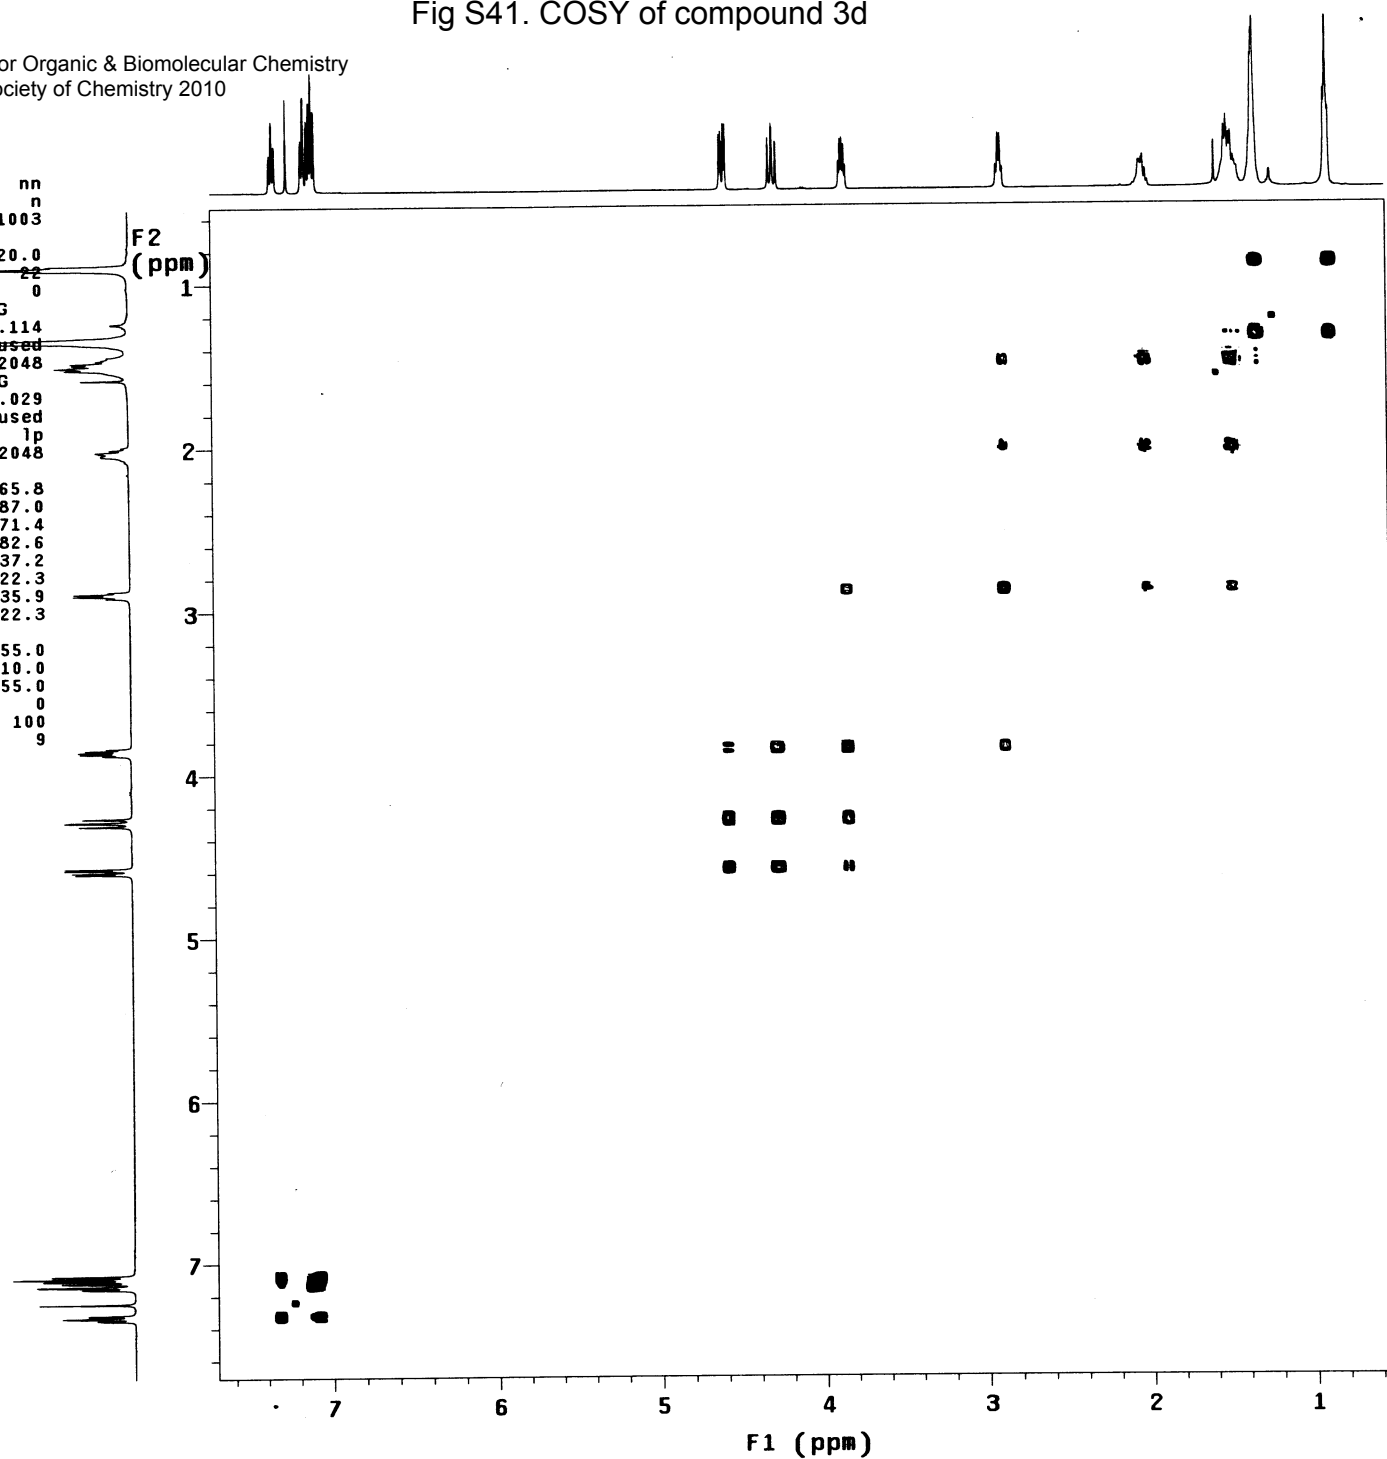

Fig S42. NOESY of compound 3d

# Supplementary Material (ESI) for Organic & Biomolecular Chemistry  
 # This journal is (c) The Royal Society of Chemistry 2010

exp7 NOESY

| SAMPLE         |             | FLAGS         |          |
|----------------|-------------|---------------|----------|
| date           | Apr 28 2010 | hs            | n        |
| solvent        | cdc13       | sspu1         | y        |
| sample         | undefined   | PFGflg        | y        |
| ACQUISITION    |             | hsglv1        | 1003     |
| sw             | 4490.3      | SPECIAL       |          |
| at             | 0.228       | temp          | 20.0     |
| np             | 2048        | gain          | 22       |
| fb             | not used    | spin          | 0        |
| ss             | 32          | F2 PROCESSING |          |
| di             | 1.000       | gf            | 0.105    |
| nt             | 16          | gfs           | not used |
| 2D ACQUISITION |             | fn            | 2048     |
| sw1            | 4490.3      | F1 PROCESSING |          |
| ni             | 200         | gf1           | 0.041    |
| TRANSMITTER    |             | gfs1          | not used |
| tn             | H1          | procl         | lp       |
| sfrq           | 499.829     | fn1           | 2048     |
| tof            | -250.0      | DISPLAY       |          |
| tpwr           | 58          | sp            | 267.0    |
| pw             | 11.100      | wp            | 3556.3   |
| NOESY          |             | sp1           | 272.3    |
| mix            | 0.600       | wp1           | 3556.3   |
| PRESATURATION  |             | rfl           | 1935.9   |
| satmode        | nnnn        | rfp           | 1922.3   |
| satpwr         | 0           | rfl1          | 1935.0   |
| satdly         | 0           | rfp1          | 1922.3   |
| satfrq         | 0           | PLOT          |          |
| DECOUPLER      |             | wc            | 155.0    |
| dn             | C13         | sc            | 10.0     |
| dm             | nnn         | wc2           | 155.0    |
|                |             | sc2           | 0        |
|                |             | vs            | 100      |
|                |             | th            | 1        |
|                |             | ai            | ph       |

F2  
(ppm)

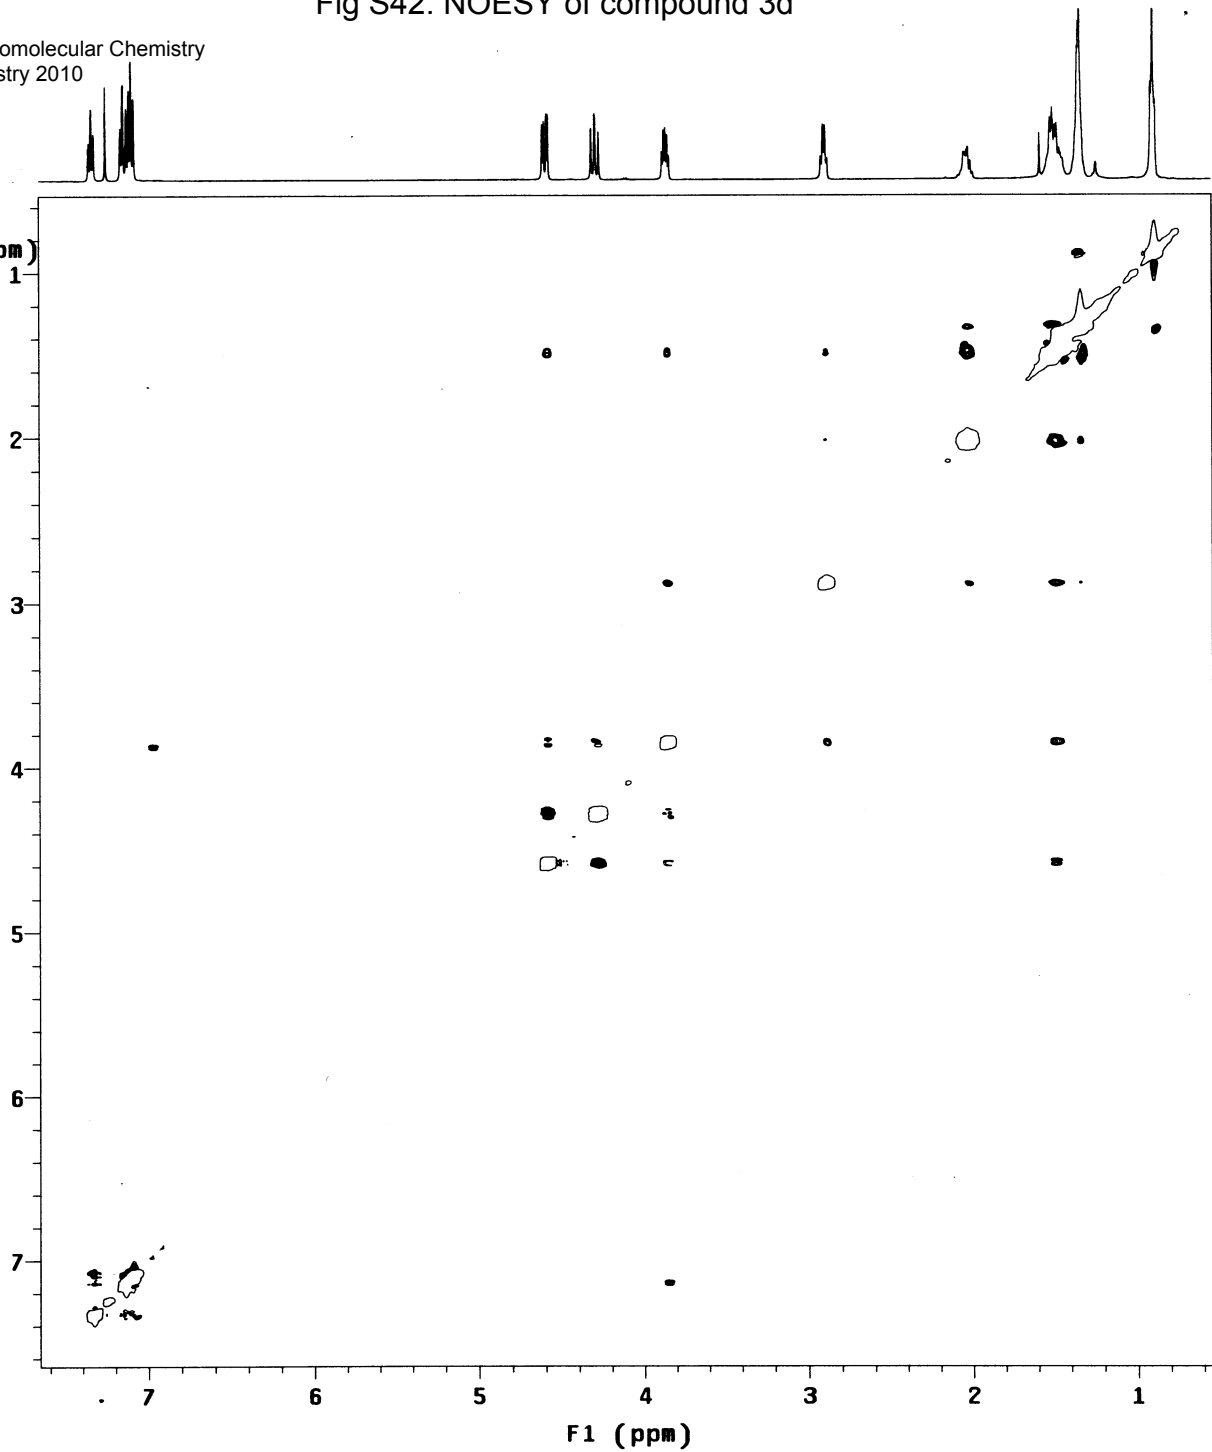

F1 (ppm)

Fig S43. 1H NMR (CDCl3, 500 MHz) of compound cis-3e

PMK-02-371-f1

# Supplementary Material (ESI) for Organic & Biomolecular Chemistry  
 # This journal is (c) The Royal Society of Chemistry 2010

```

SAMPLE          DEC. & VT
date May 7 2010 dfrq      125.693
solvent cdc13          dn      C13
file exp              dpwr     30
ACQUISITION
sfrq 499.830         dof      0
tn H1               dm      nnn
at 3.000            dmm      c
np 48000           dmf      200
sw 8000.0          dseq
fb not used        dres      1.0
bs 4               homo
tpwr 58            wtfile
pw 4.8            proc      ft
d1 1.000          fn      not used
tof 499.7         math      f
nt 4
ct 4              werr      react
alock y           wexp     procplot
gain not used     wbs
FLAGS            wnt      wft
il n
in n
dp y
hs nn
DISPLAY
sp -250.1
wp 5248.0
vs 75
sc 0
wc 210
hzmm 24.99
is 345.52
rfl 4637.9
rfp 3618.7
th 2
ins 100.000
ai cdc ph
    
```

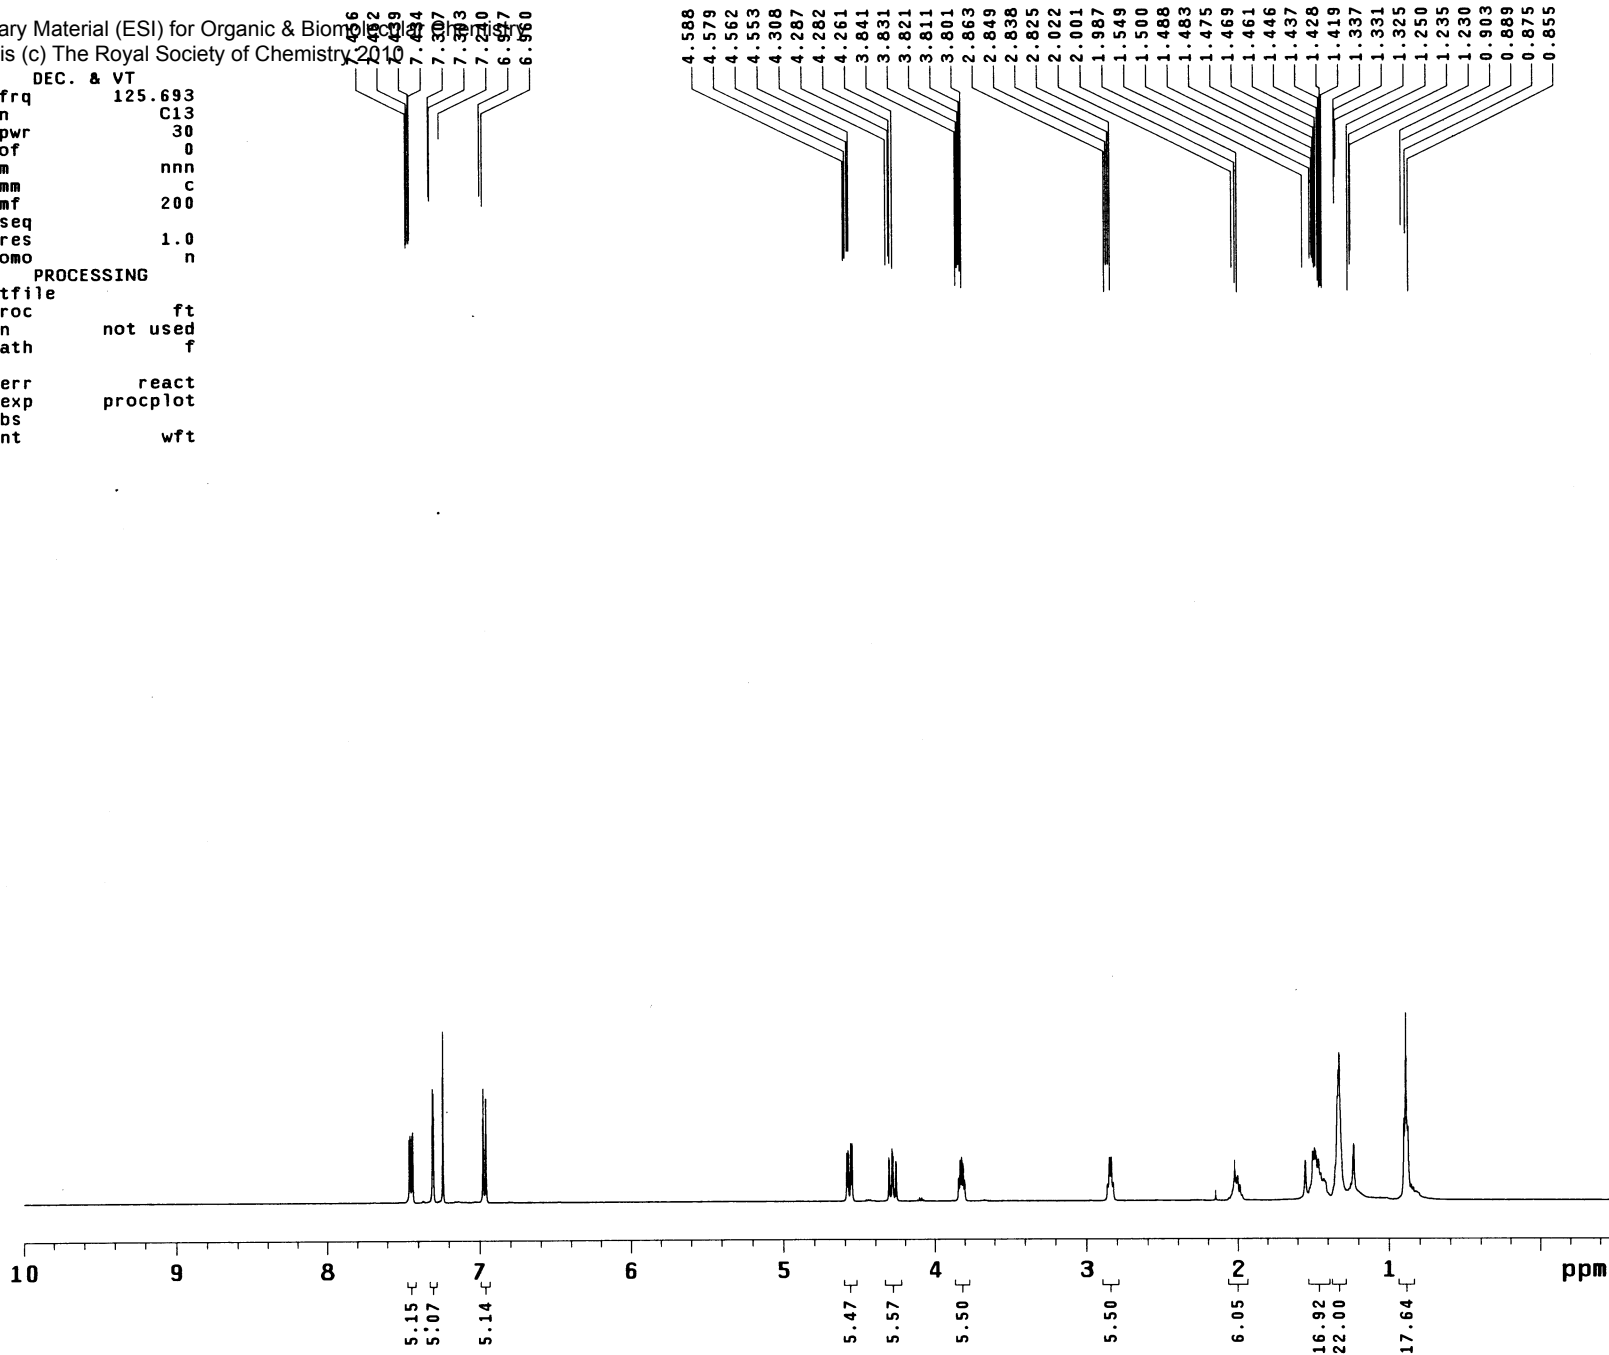

# Fig S44. <sup>13</sup>C NMR (CDCl<sub>3</sub>, 125 MHz) of compound cis-3e

PMK-02-371-f1

# Supplementary Material (ESI) for Organic & Biomolecular Chemistry  
 This journal is (c) The Royal Society of Chemistry 2010

```

SAMPLE          DEC. & VT
date May 7 2010 dfrq          499.829
solvent cdc13      dn           H1
file      exp      dpwr          39
ACQUISITION    dof           0
sfrq      125.696 dm           yyy
tn         C13      dmm           w
at         1.000 dmf          11905
np         62894 dseq
sw         31446.5 dres          1.0
fb         not used homo        n
bs         16
ss         2
tpwr       54 wtfile
pw         4.0 proc
d1         1.000 fn           not used
tof        2512.2 math          f
nt         1024
ct         1024 werr          react
alock      y wexp          procplot
gain       not used wbs          testsn
FLAGS
il         n
in         n
dp         y
hs         nn
DISPLAY
sp        -1257.0
wp        28906.3
vs        100
sc         0
wc         210
hzmm      137.65
is         500.00
rf1       10981.5
rfp       9677.5
th         4
ins       100.000
nm cdc ph
    
```

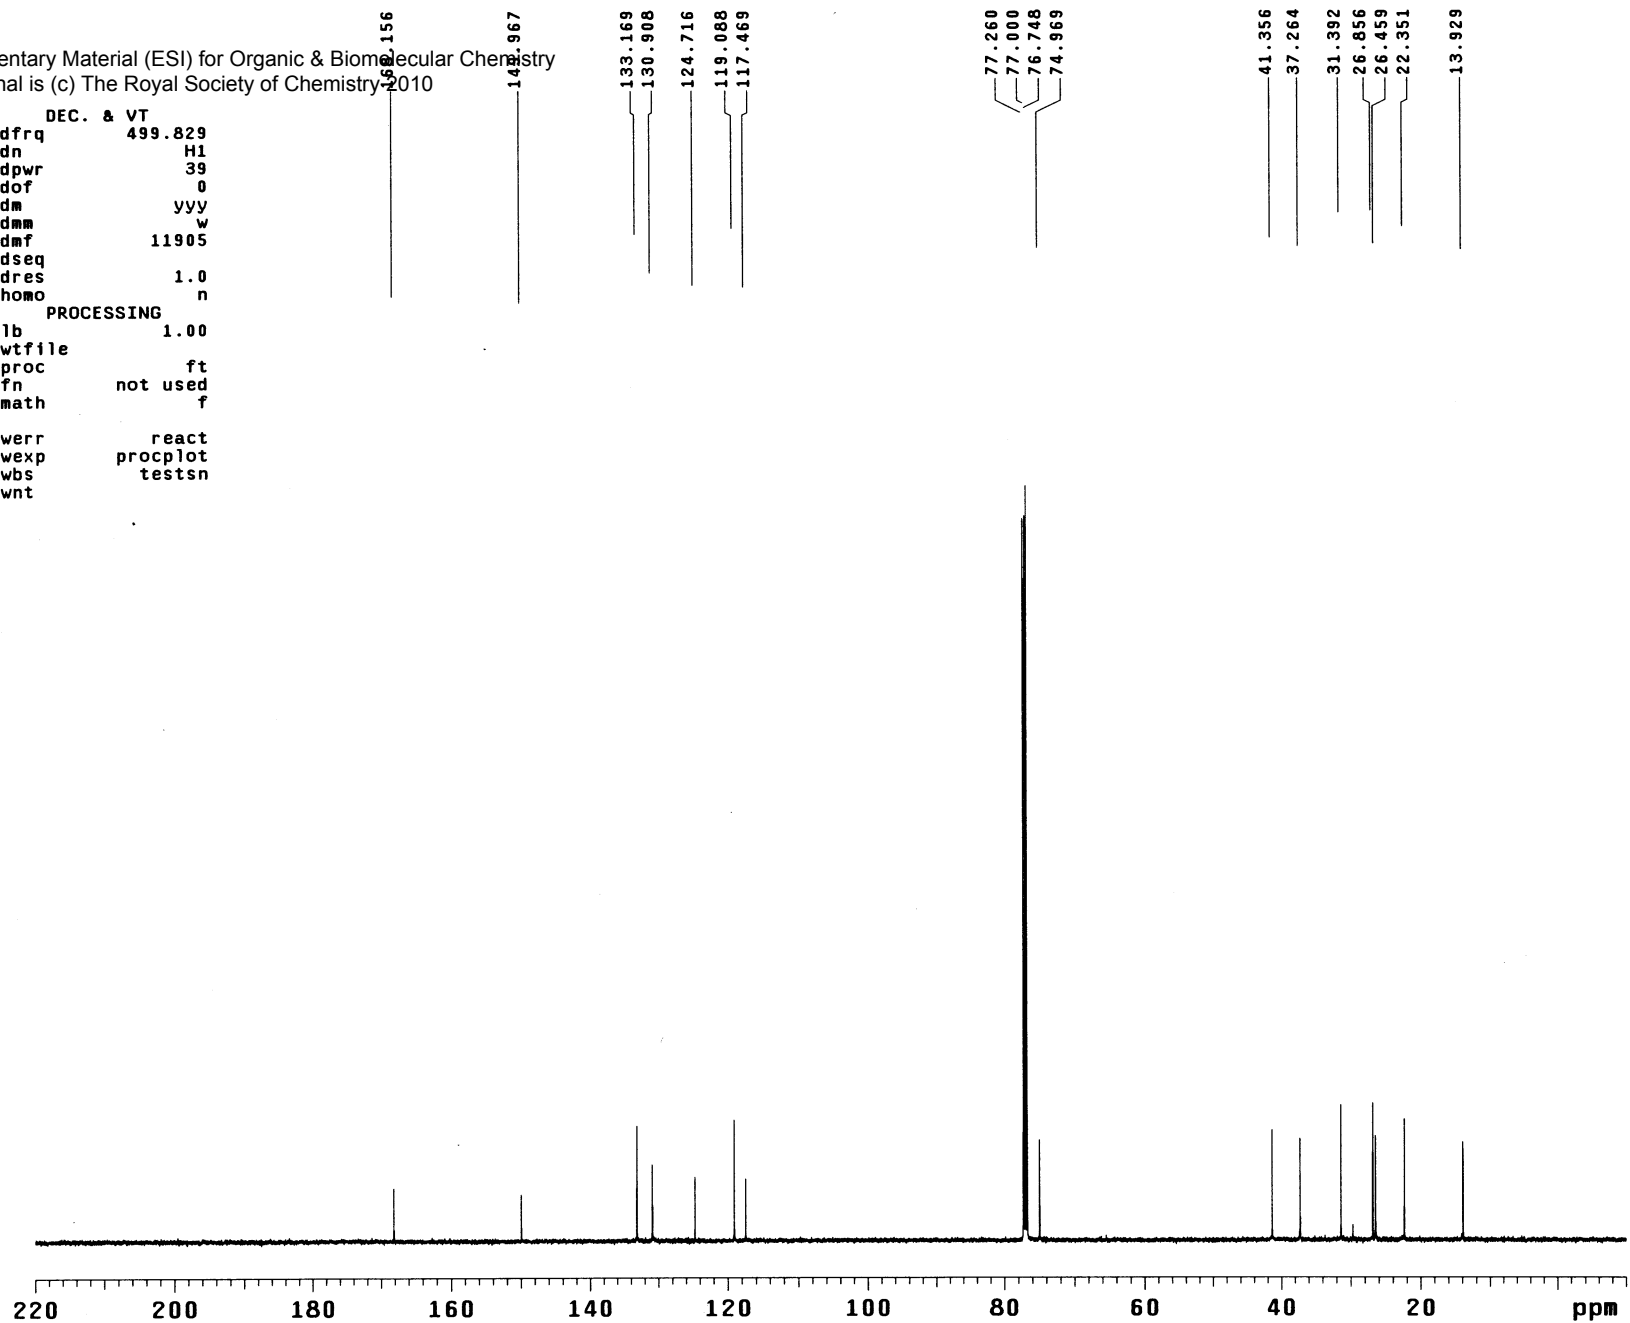

# Fig S45. DEPT of compound cis-3e

PMK-02-371 # Supplementary Material (ESI) for Organic & Biomolecular Chemistry

# This journal is (c) The Royal Society of Chemistry 2010

exp14 DEPT

|             |            |            |          |       |          |      |
|-------------|------------|------------|----------|-------|----------|------|
| date        | May 7 2010 | j1xh       | DEPT     | 140.0 | array    | mult |
| solvent     | cdcl3      | mult       | arrayed  |       | arraydim | 3    |
| sample      | undefined  | SPECIAL    |          |       |          |      |
| ACQUISITION |            | temp       | not used | 1     | mult     |      |
| sw          | 31446.5    | gain       | 28       | 1     | 0.5      |      |
| at          | 1.000      | spin       | 0        | 2     | 1        |      |
| np          | 62894      | PROCESSING |          | 3     | 1.5      |      |
| bs          | 16         | lb         | 1.00     |       |          |      |
| ss          | -4         | fn         | not used |       |          |      |
| d1          | 1.000      | SPECTRUM   |          |       |          |      |
| nt          | 1024       | wp         | 28906.3  |       |          |      |
| ct          | 1024       | sp         | -1257.0  |       |          |      |
| TRANSMITTER |            | rp         | 131.6    |       |          |      |
| tn          | C13        | lp         | 192.7    |       |          |      |
| tof         | 2512.2     | ai         | cdc ph   |       |          |      |
| tpwr        | 54         | REFERENCE  |          |       |          |      |
| pw          | 11.500     | rfl        | 1305.0   |       |          |      |
| DECOUPLER   |            | rfl        | 0        |       |          |      |
| dn          | H1         | PLOT       |          |       |          |      |
| dof         | 0          | wc         | 210      |       |          |      |
| dpwr        | 39         | sc         | 0        |       |          |      |
| dm          | nny        | vs         | 150      |       |          |      |
| dmm         | ccw        | hzmm       | 137.65   |       |          |      |
| dmf         | 11905      | th         | 68       |       |          |      |
| pp1v1       | 51         |            |          |       |          |      |
| pp          | 28.000     |            |          |       |          |      |

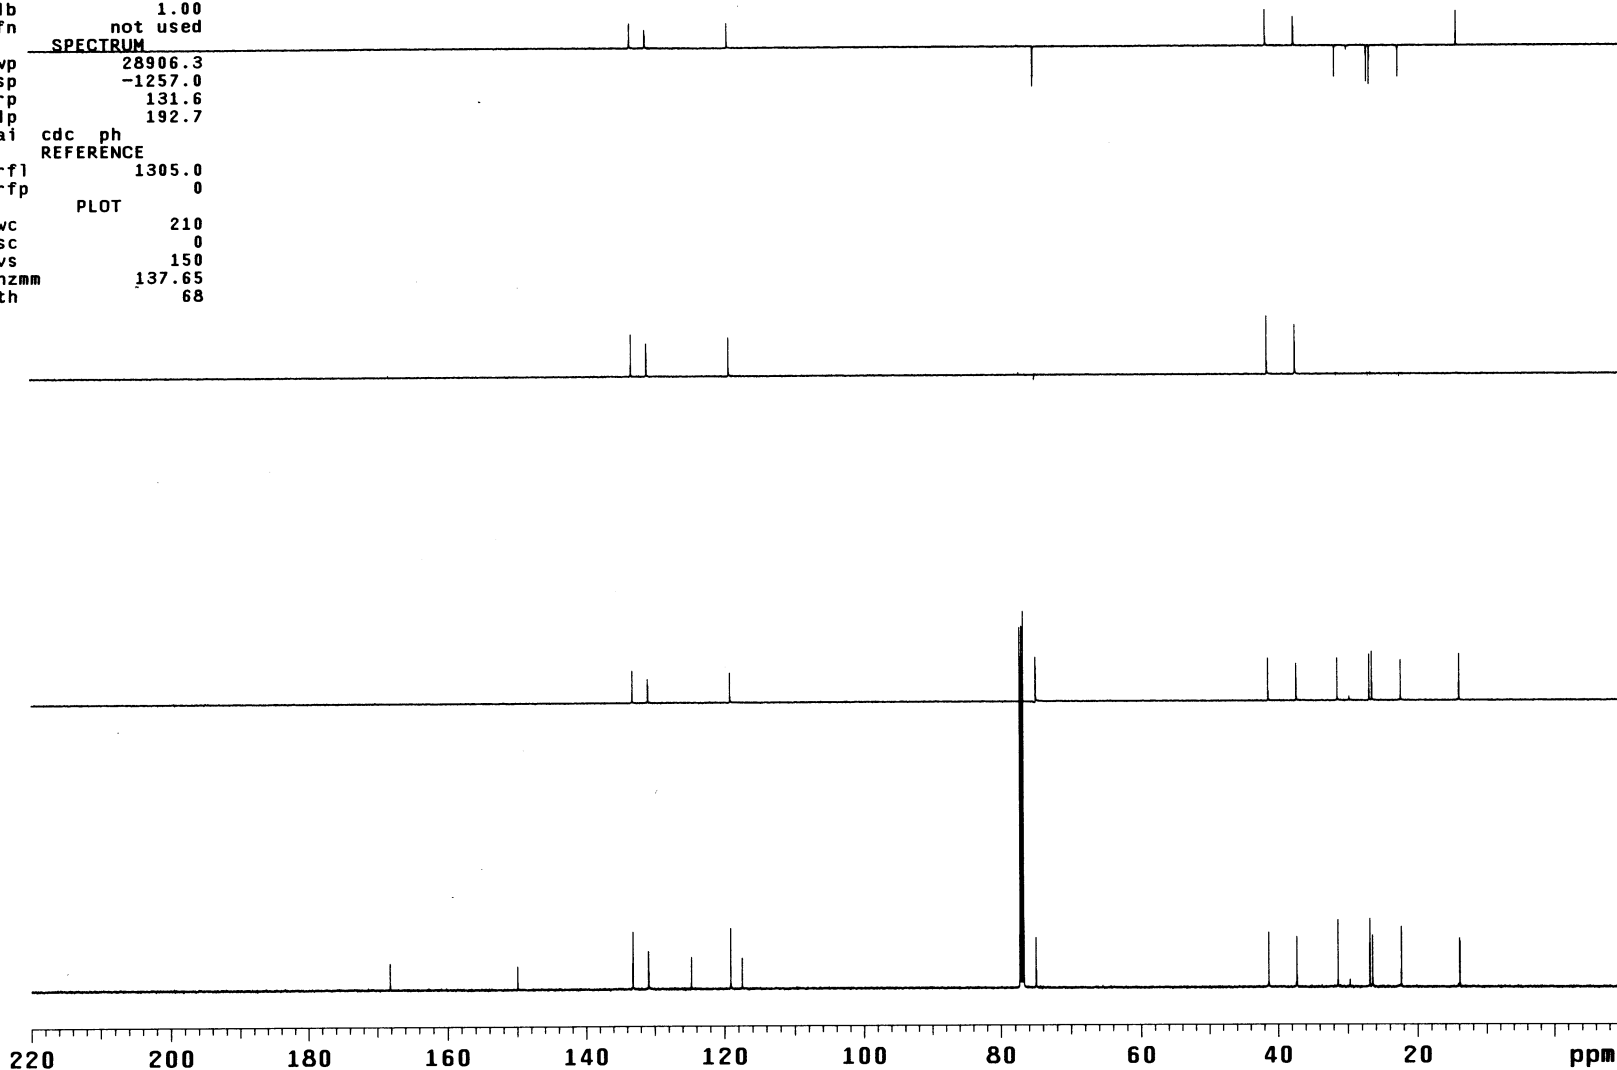

Fig S46. HSQC of compound cis-3e

# Supplementary Material (ESI) for Organic & Biomolecular Chemistry  
 # This journal is (c) The Royal Society of Chemistry 2010  
 exp17 gHSQC

| SAMPLE           | FLAGS         | ACQUISITION | ARRAYS |
|------------------|---------------|-------------|--------|
| date May 7 2010  | hs            | n           | phase  |
| solvent cdc13    | sspul         | array       | 256    |
| sample undefined | PFGflg        | arraydim    |        |
| ACQUISITION      | hsglv1        | 1           | phase  |
| sw 4490.3        | SPECIAL       | 1           | 1      |
| at 0.228         | temp          | not used    | 2      |
| np 2048          | gain          | 20          |        |
| fb not used      | spin          | 0           |        |
| ss 32            | GRADIENTS     |             |        |
| d1 1.000         | gzlv11        | 1003        |        |
| nt 8             | gt1           | 0.002000    |        |
| 2D ACQUISITION   | gzlv13        | 505         |        |
| sw1 21367.5      | gt3           | 0.001000    |        |
| ni 128           | gstab         | 0.000500    |        |
| phase arrayed    | F2 PROCESSING |             |        |
| TRANSMITTER      | gf            | 0.105       |        |
| tn H1            | gfs           | not used    |        |
| sfrq 499.829     | fn            | 2048        |        |
| tof -250.0       | F1 PROCESSING |             |        |
| tpwr 58          | gf1           | 0.006       |        |
| pw 11.100        | gfs1          | not used    |        |
| DECOUPLER        | proc1         | lp          |        |
| dn C13           | fn1           | 2048        |        |
| dof -2515.2      | DISPLAY       |             |        |
| dm nny           | sp            | 296.7       |        |
| dmm ccp          | wp            | 3595.8      |        |
| dmf 32258        | sp1           | 1233.0      |        |
| dpwr 36          | wp1           | 15963.0     |        |
| pwxlv1 52        | rf1           | 2156.4      |        |
| pwx 14.300       | rfp           | 2141.8      |        |
| HSQC             | rf11          | 10714.1     |        |
| j1xh 140.0       | rfp1          | 9422.2      |        |
| nullflg y        | PLOT          |             |        |
| mult 2           | wc            | 150.0       |        |
|                  | sc            | 6.2         |        |
|                  | wc2           | 116.2       |        |
|                  | sc2           | 0           |        |
|                  | vs            | 100         |        |
|                  | th            | 6           |        |
|                  | ai            | cdc         | ph     |

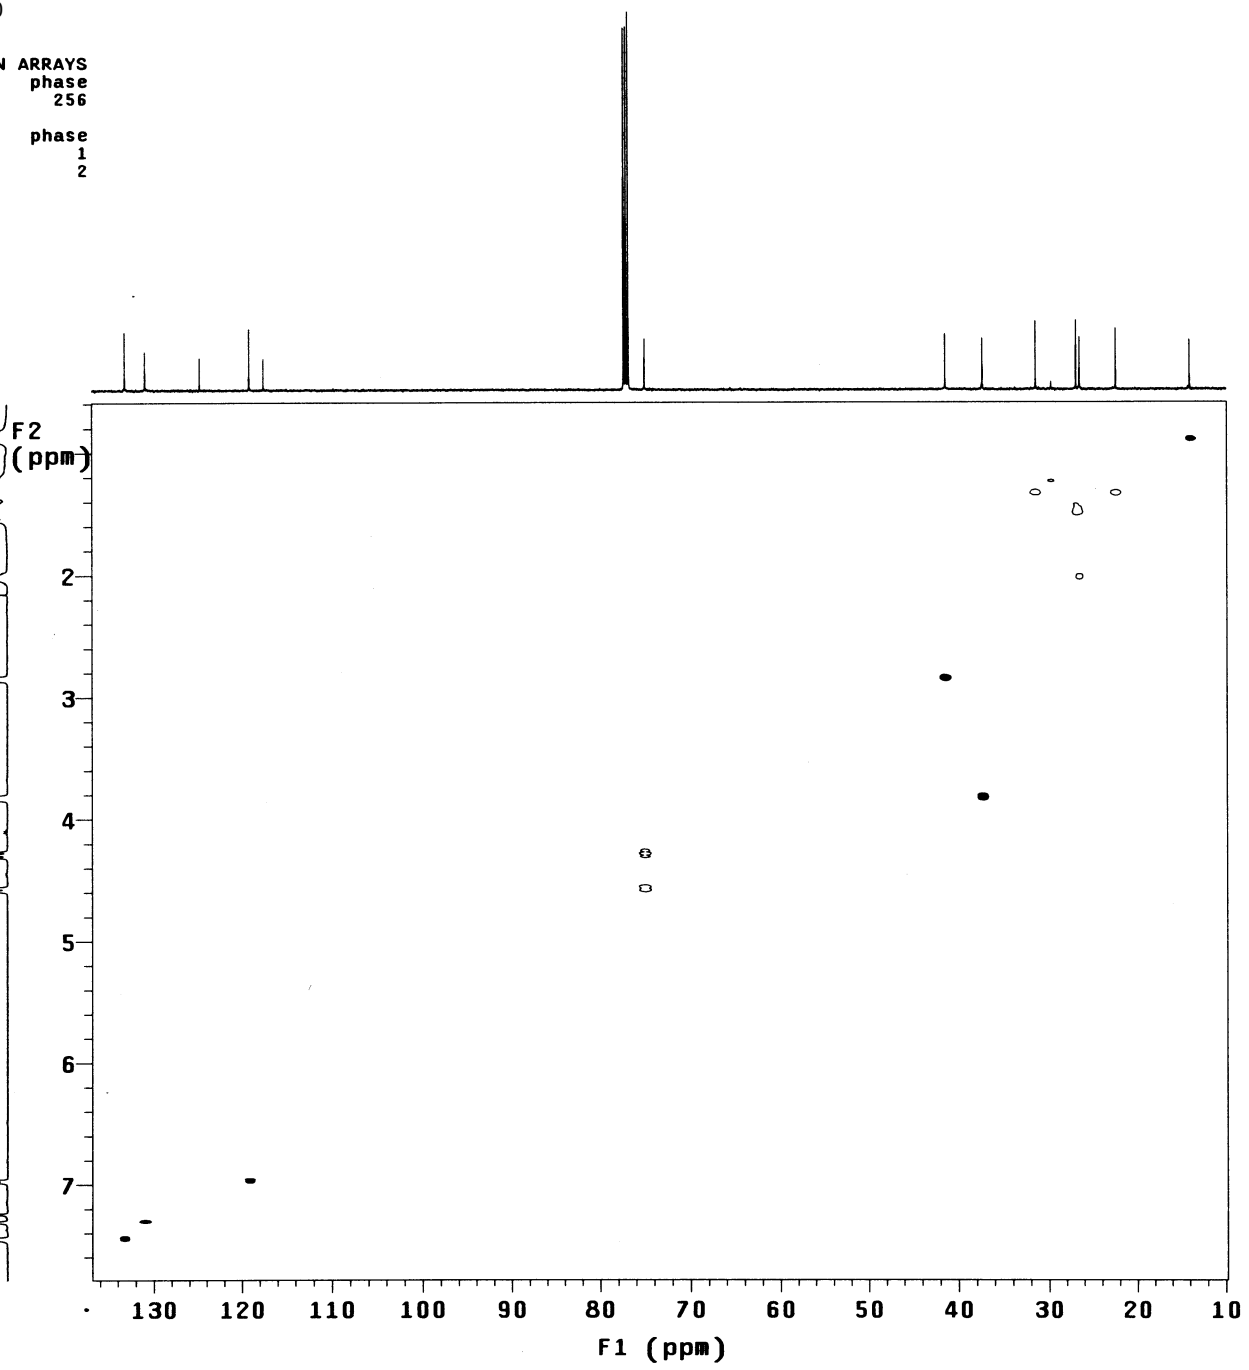

Fig S47. COSY of compound cis-3e

# Supplementary Material (ESI) for Organic & Biomolecular Chemistry

PMK-02-371-71 This journal is (c) The Royal Society of Chemistry 2010

exp15 gCOSY

|                |            |               |          |
|----------------|------------|---------------|----------|
| date           | May 7 2010 | hs            | nn       |
| solvent        | cdc13      | sspul         | n        |
| sample         | undefined  | hsglv         | 1003     |
| ACQUISITION    |            | SPECIAL       |          |
| sw             | 4490.3     | temp          | not used |
| at             | 0.228      | gain          | 28       |
| np             | 2048       | spin          | 0        |
| fb             | not used   | F2 PROCESSING |          |
| ss             | 16         | sb            | -0.114   |
| d1             | 1.000      | sbs           | not used |
| nt             | 8          | fn            | 2048     |
| 2D ACQUISITION |            | F1 PROCESSING |          |
| sw1            | 4490.3     | sb1           | -0.029   |
| ni             | 128        | sbs1          | not used |
| TRANSMITTER    |            | proc1         |          |
| tn             | H1         | fn1           | 2048     |
| sfrq           | 499.829    | DISPLAY       |          |
| tof            | -250.0     | sp            | 292.7    |
| tpwr           | 58         | wp            | 3556.3   |
| pw             | 11.100     | sp1           | 294.2    |
| GRADIENTS      |            | wp1           | 3556.3   |
| gzlv1          | 1003       | rfl           | 2160.4   |
| gt1            | 0.001000   | rfp           | 2141.8   |
| gstab          | 0.000500   | rfl1          | 2154.5   |
| DECOUPLER      |            | rfp1          | 2141.7   |
| dn             | C13        | PLOT          |          |
| dm             | nnn        | wc            | 155.0    |
|                |            | sc            | 10.0     |
|                |            | wc2           | 155.0    |
|                |            | sc2           | 0        |
|                |            | vs            | 100      |
|                |            | th            | 8        |
|                |            | ai            | cdc av   |

F2 (ppm)

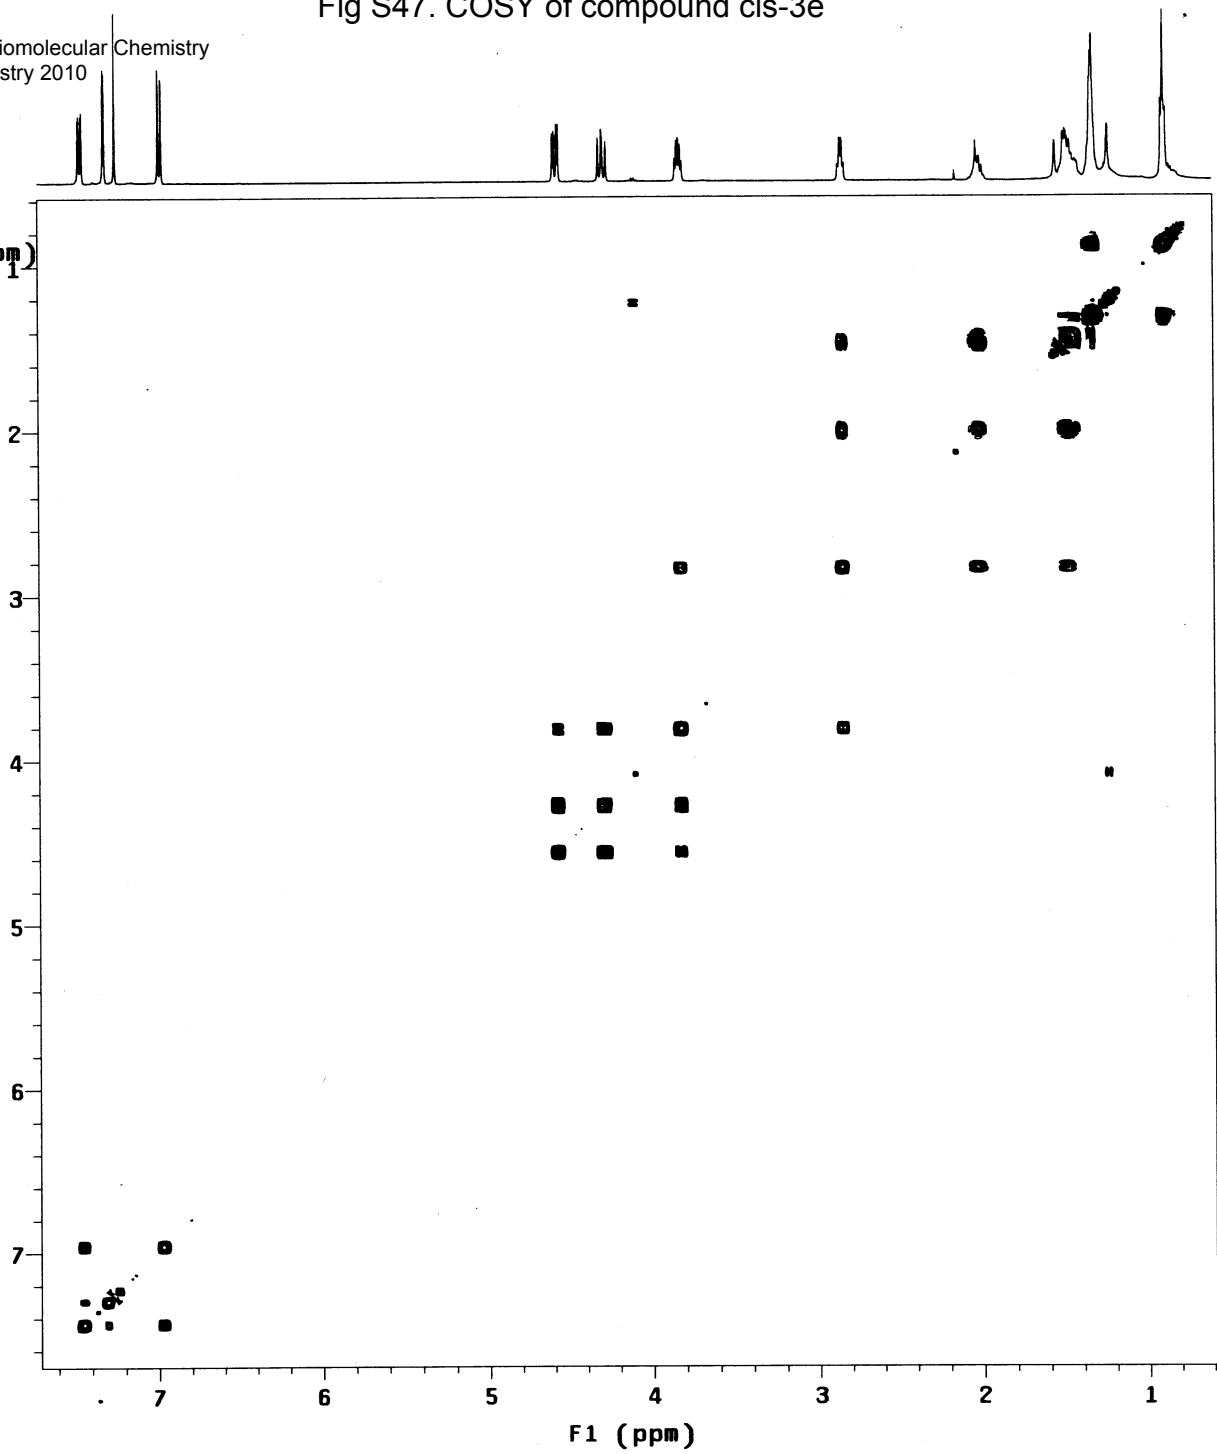

F1 (ppm)

Fig S48. NOESY of compound cis-3e

# Supplementary Material (ESI) for Organic & Biomolecular Chemistry  
 PMK-02-371# This journal is (c) The Royal Society of Chemistry 2010

exp16 NOESY

| SAMPLE         |            | FLAGS         |          |
|----------------|------------|---------------|----------|
| date           | May 7 2010 | hs            | n        |
| solvent        | cdcl3      | sspul         | y        |
| sample         | undefined  | PFGflg        | y        |
| ACQUISITION    |            | hsglvt        | 1003     |
| sw             | 4490.3     | SPECIAL       |          |
| at             | 0.228      | temp          | not used |
| np             | 2048       | gain          | 28       |
| fb             | not used   | spin          | 0        |
| ss             | 32         | F2 PROCESSING |          |
| d1             | 1.000      | gt            | 0.105    |
| nt             | 8          | gfs           | not used |
| 2D ACQUISITION |            | fn            | 2048     |
| sw1            | 4490.3     | F1 PROCESSING |          |
| ni             | 200        | gf1           | 0.041    |
| TRANSMITTER    |            | gfs1          | not used |
| tn             | H1         | procl         | lp       |
| sfrq           | 499.829    | fn1           | 2048     |
| tof            | -250.0     | DISPLAY       |          |
| tpwr           | 58         | sp            | 248.8    |
| pw             | 11.100     | wp            | 3600.2   |
| NOESY          |            | sp1           | 254.7    |
| mix            | 0.600      | wp1           | 3600.2   |
| PRESATURATION  |            | rfl           | 2156.0   |
| satmode        | nnnn       | rfp           | 2141.8   |
| satpwr         | 0          | rfl1          | 2154.6   |
| satdly         | 0          | rfp1          | 2141.7   |
| satfrq         | 0          | PLOT          |          |
| DECOUPLER      |            | wc            | 155.0    |
| dn             | C13        | sc            | 10.0     |
| dm             | nnn        | wc2           | 155.0    |
|                |            | sc2           | 0        |
|                |            | vs            | 100      |
|                |            | th            | 1        |
|                |            | al            | ph       |

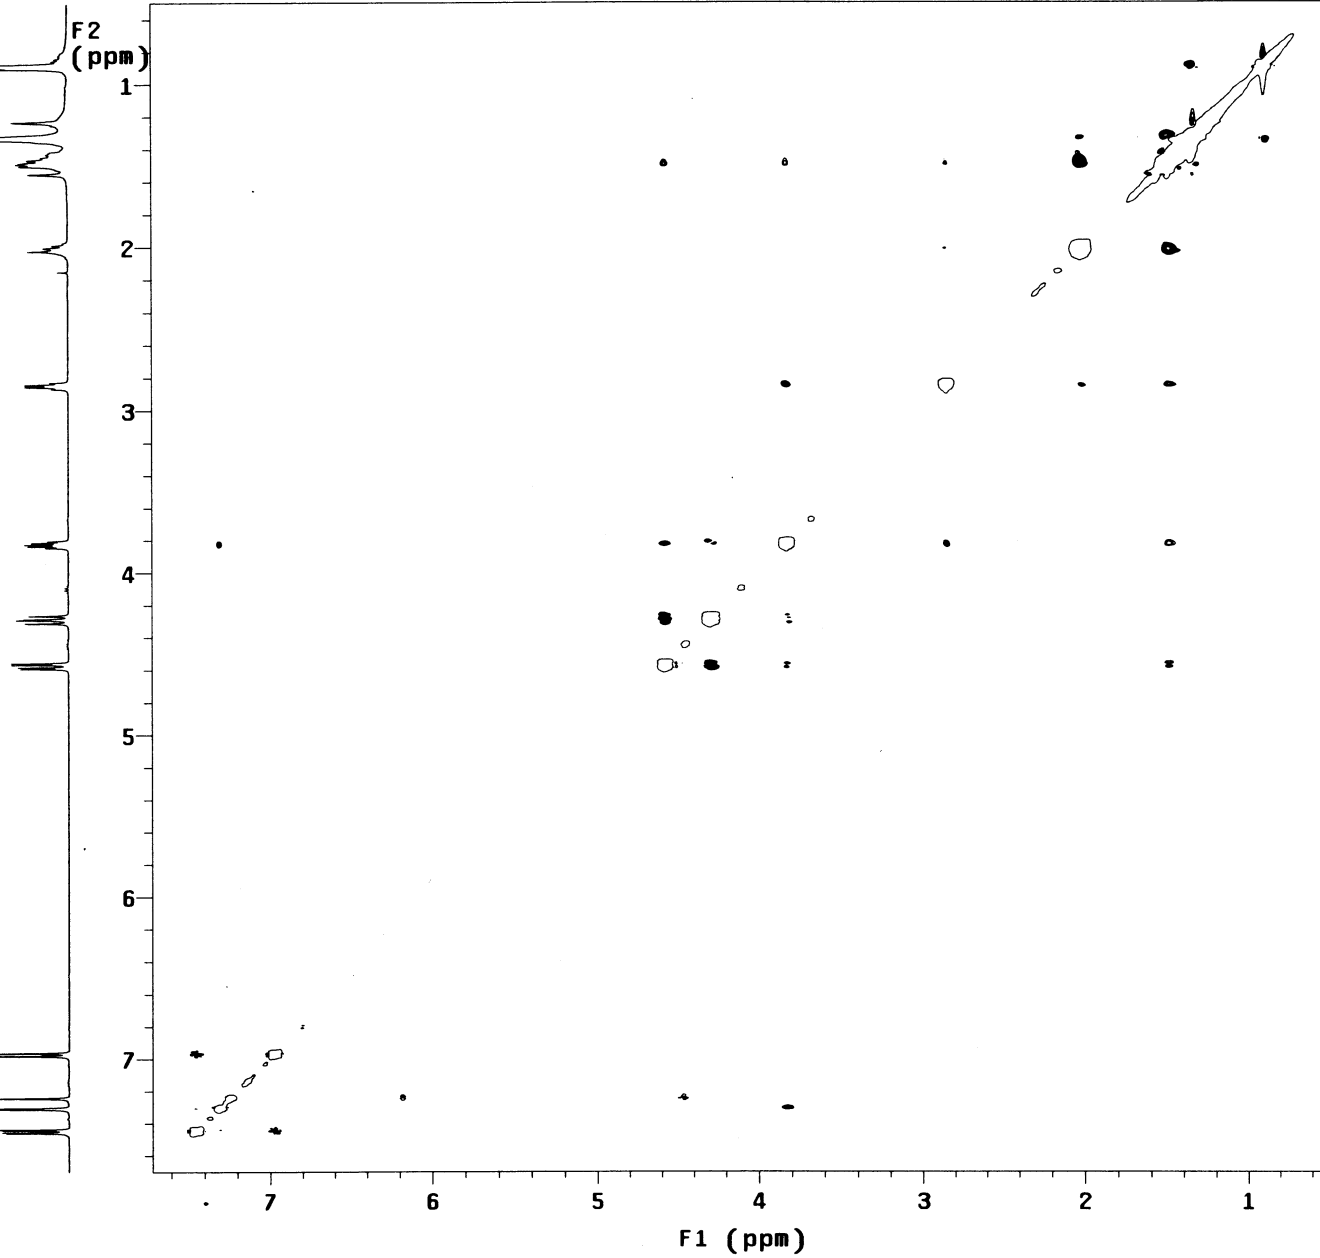



Fig S49. 1H NMR (CDCl3, 500 MHz) of compound trans-3e

PMK-02-371-f2

exp43 s2p01 # Supplementary Material (ESI) for Organic & Biomolecular Chemistry  
 # This journal is (c) The Royal Society of Chemistry 2010

|             |            |            |          |
|-------------|------------|------------|----------|
| date        | May 6 2010 | dfrq       | 125.693  |
| solvent     | cdc13      | dn         | C13      |
| file        | exp        | dpwr       | 30       |
|             |            | dof        | 0        |
| ACQUISITION |            |            |          |
| sfrq        | 499.830    | dm         | nnn      |
| tn          | H1         | dmm        | c        |
| at          | 3.000      | dmf        | 200      |
| np          | 48000      | dseq       |          |
| sw          | 8000.0     | dres       | 1.0      |
| fb          | not used   | homo       | n        |
| bs          | 4          | PROCESSING |          |
| tpwr        | 58         | wtfile     |          |
| pw          | 4.8        | proc       | ft       |
| d1          | 1.000      | fn         | not used |
| tof         | 499.7      | math       | f        |
| nt          | 4          |            |          |
| ct          | 4          | werr       | react    |
| alock       |            | wexp       | procplot |
| gain        | not used   | wbs        |          |
|             | FLAGS      | wnt        | wft      |
| il          |            | n          |          |
| in          |            | n          |          |
| dp          |            | y          |          |
| hs          |            | nn         |          |
| DISPLAY     |            |            |          |
| sp          | -250.1     |            |          |
| wp          | 5248.0     |            |          |
| vs          | 75         |            |          |
| sc          | 0          |            |          |
| wc          | 210        |            |          |
| hzmm        | 24.99      |            |          |
| is          | 258.08     |            |          |
| rfl         | 4637.9     |            |          |
| rfp         | 3618.7     |            |          |
| th          | 3          |            |          |
| ins         | 100.000    |            |          |
| ai          | cdc        | ph         |          |

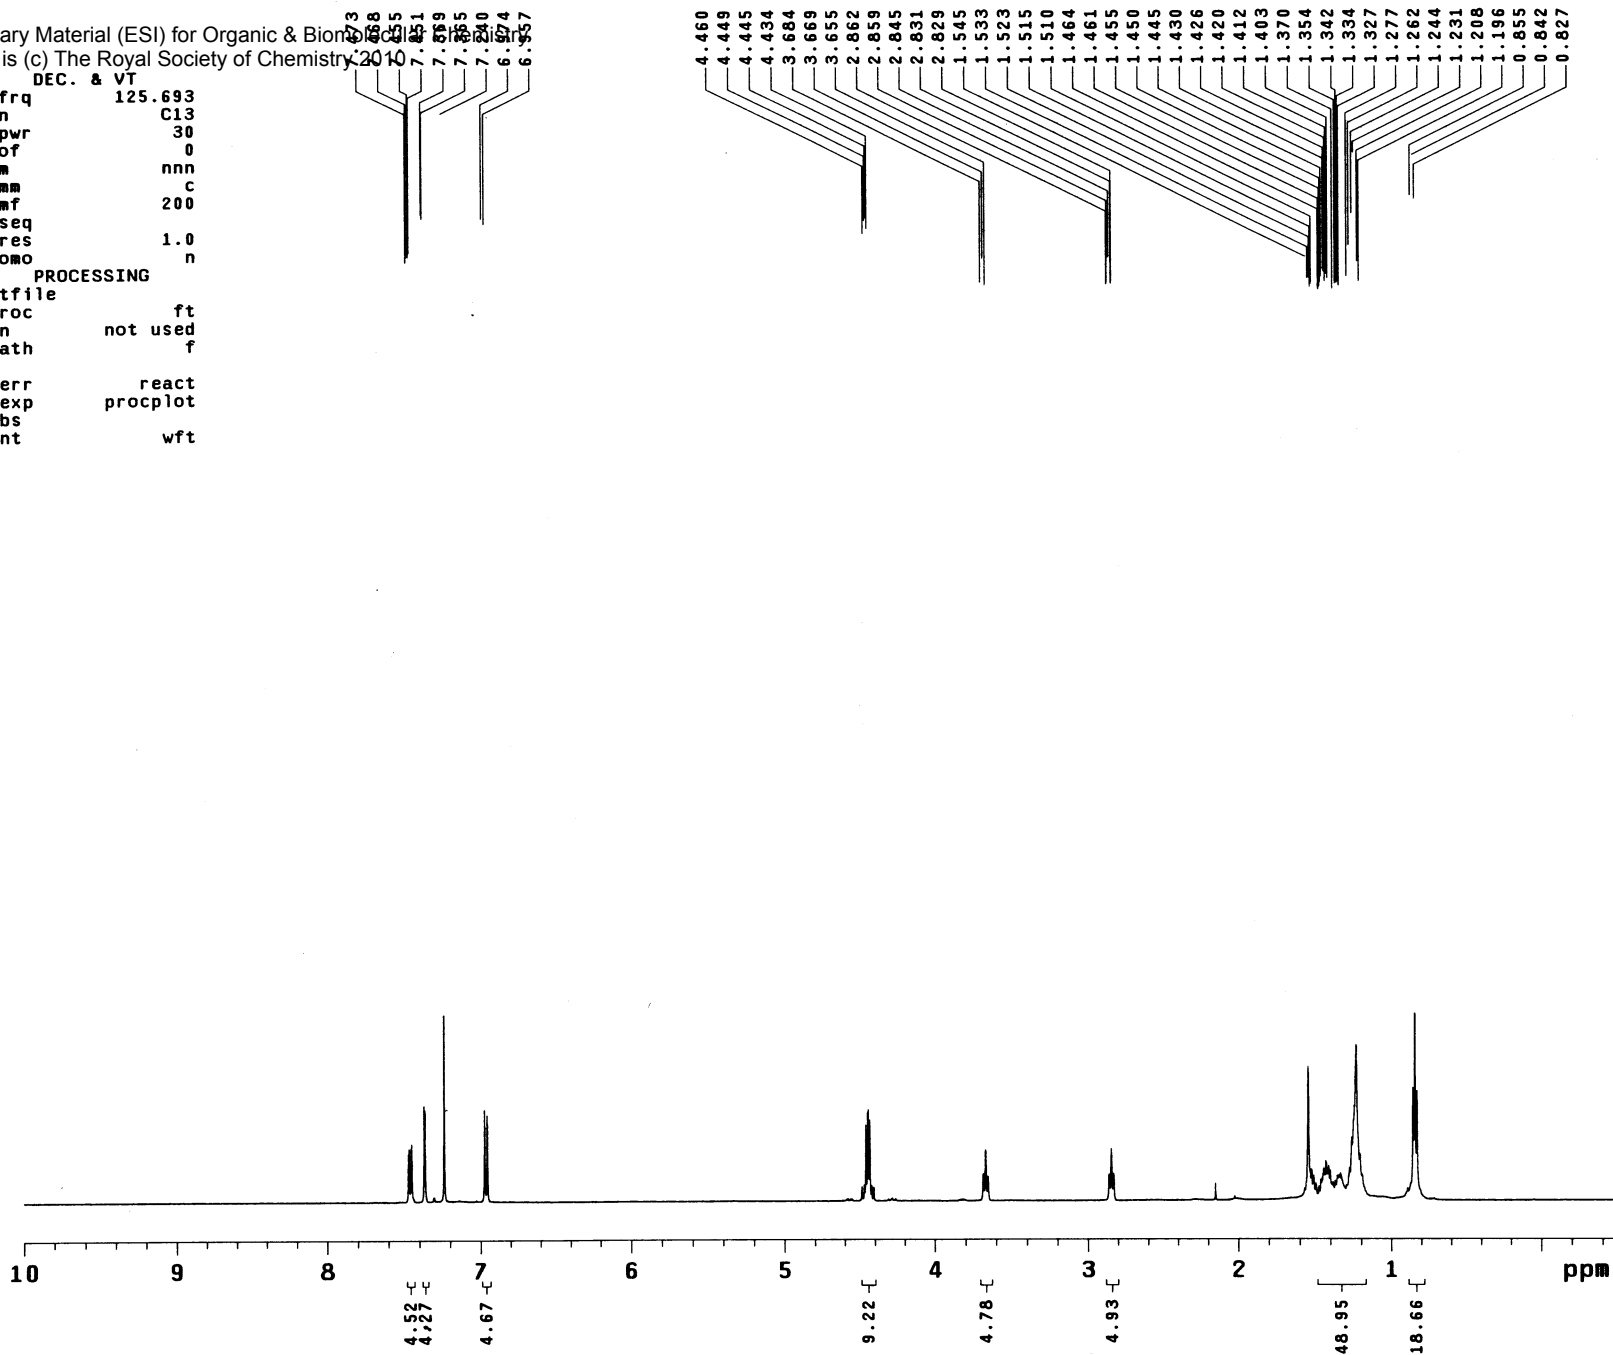

Fig S50. <sup>13</sup>C NMR (CDCl<sub>3</sub>, 125 MHz) of compound trans-3e

PMK-02-371-# Supplementary Material (ESI) for Organic & Biomolecular Chemistry  
 exp44 s2pu1 # This journal is (c) The Royal Society of Chemistry 2010

```

SAMPLE          DEC. & VT
date  May 6 2010  dfrq  499.829
solvent  cdcl3    dn    H1
file     exp      dpwr   39
ACQUISITION    dof    0
sfrq  125.696    dm     yyv
tn     C13       dmf    w
at     1.000     dmf    11905
np     62894     dseq
sw     31446.5   dres   1.0
fb     not used  homo   n
bs     16        PROCESSING
ss     2         lb     1.00
tpwr   54        wtfile
pw     4.0       proc
d1     1.000     fn     not used
tof    2512.2    math   f
nt     2048
ct     2048     werr   react
alock  y         wexp   procplot
gain   not used  wbs    testsn
          FLAGS
il     n
in     n
dp     y
hs     nn
DISPLAY
sp     -1257.0
wp     28906.3
vs     200
sc     0
wc     210
hzmm   137.65
is     500.00
rfl    10981.5
rfp    9677.5
th     6
ins    100.000
nm     cdc  ph
  
```

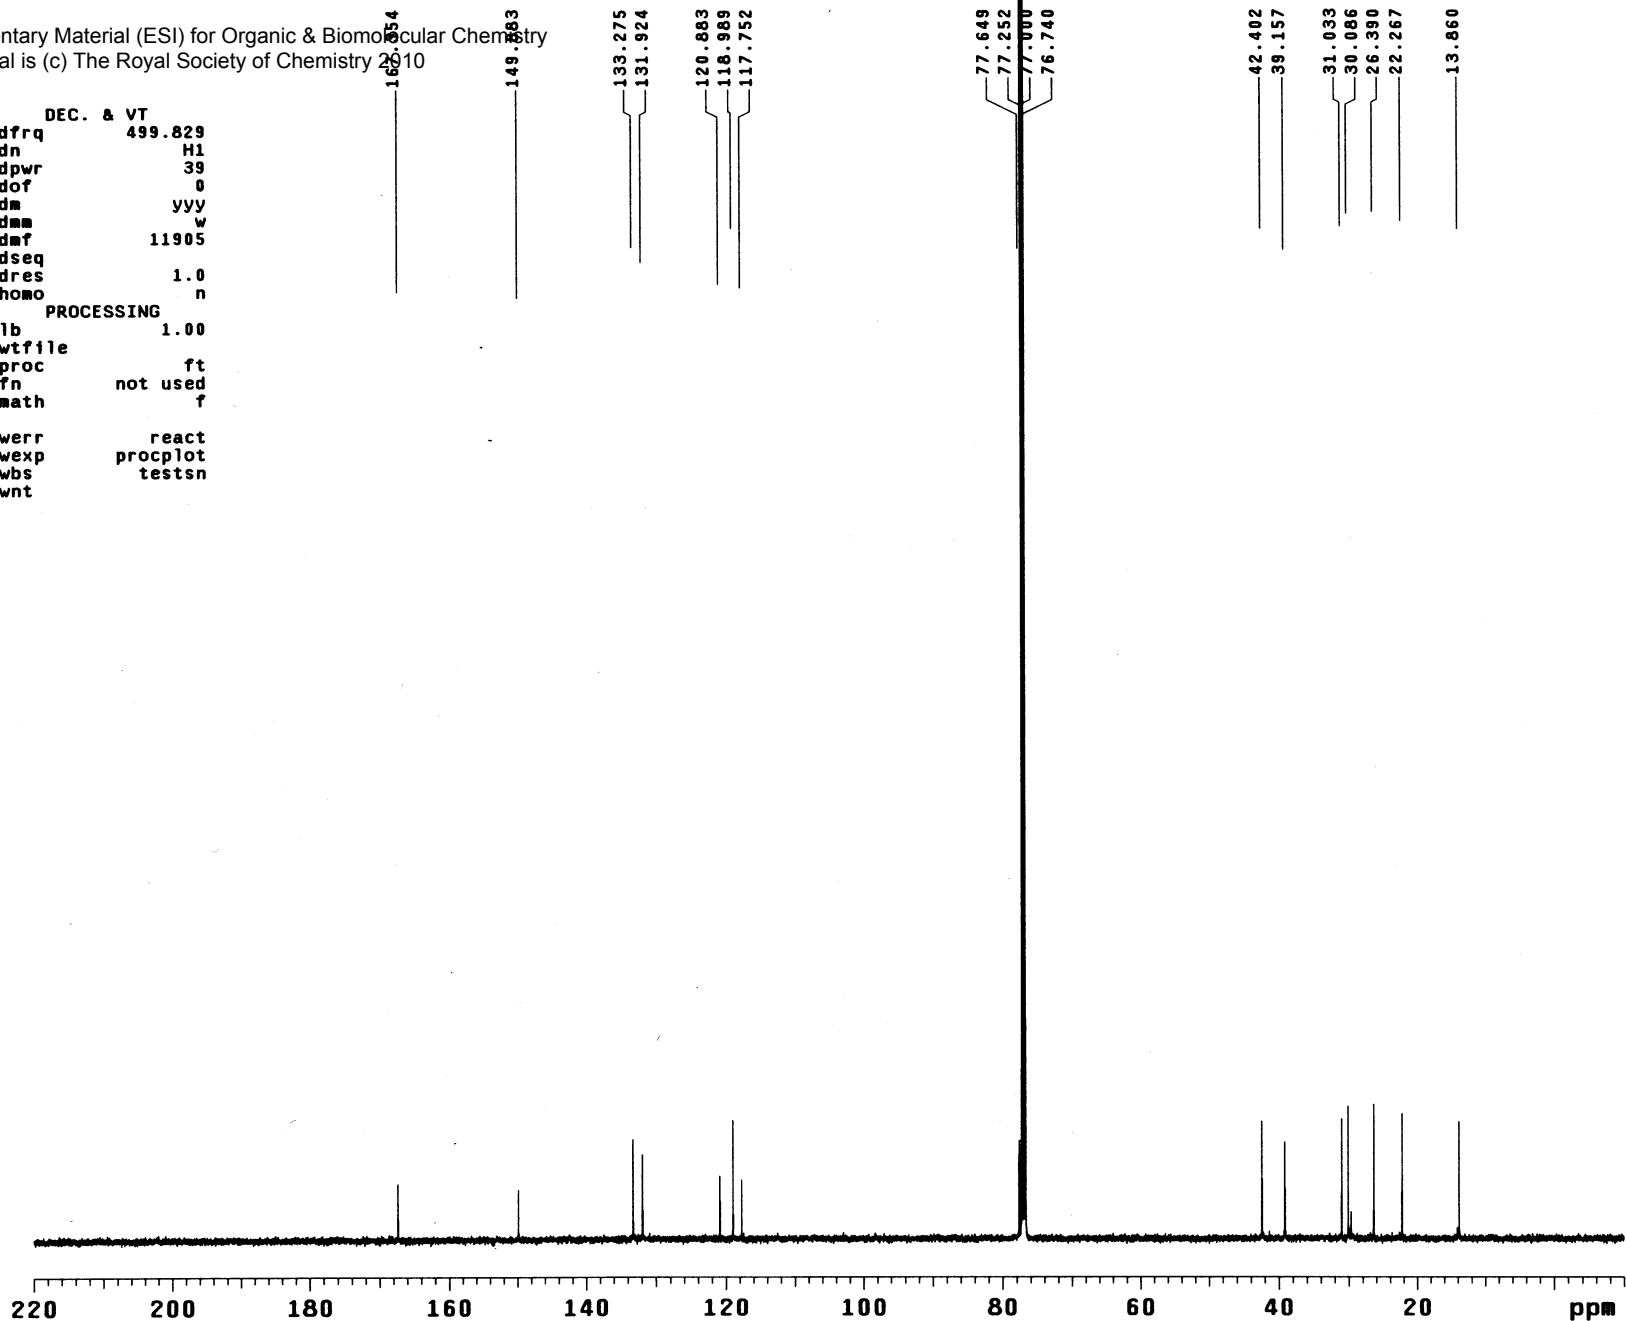

# Fig S51. DEPT of compound trans-3e

PMK-02-371-f2

# Supplementary Material (ESI) for Organic & Biomolecular Chemistry  
 exp45 DEPT # This journal is (c) The Royal Society of Chemistry 2010

|             |            |            |          |          |      |
|-------------|------------|------------|----------|----------|------|
| date        | May 6 2010 | j1xh       | 140.0    | array    | mult |
| solvent     | cdcl3      | mult       | arrayed  | arraydim | 3    |
| sample      | undefined  | SPECIAL    |          |          |      |
| ACQUISITION |            | temp       | not used | i        | mult |
| sw          | 31446.5    | gain       | 30       | 1        | 0.5  |
| at          | 1.000      | spin       | 0        | 2        | 1    |
| np          | 62894      | PROCESSING |          | 3        | 1.5  |
| bs          | 16         | lb         | 1.00     |          |      |
| ss          | -4         | fn         | not used |          |      |
| d1          | 1.000      | SPECTRUM   |          |          |      |
| nt          | 2048       | wp         | 28906.3  |          |      |
| ct          | 2048       | sp         | -1257.0  |          |      |
| TRANSMITTER |            | rp         | 134.6    |          |      |
| tn          | C13        | lp         | 186.7    |          |      |
| tof         | 2512.2     | ai         | cdc ph   |          |      |
| tpwr        | 54         | REFERENCE  |          |          |      |
| pw          | 11.500     | rfl        | 1304.0   |          |      |
| DECOUPLER   |            | rff        | 0        |          |      |
| dn          | H1         | PLOT       |          |          |      |
| dof         | 0          | wc         | 210      |          |      |
| dpwr        | 39         | sc         | 0        |          |      |
| dm          | nny        | vs         | 7500     |          |      |
| dmm         | ccw        | hzmm       | 137.65   |          |      |
| dmf         | 11905      | th         | 68       |          |      |
| pp1v1       | 51         |            |          |          |      |
| pp          | 28.000     |            |          |          |      |

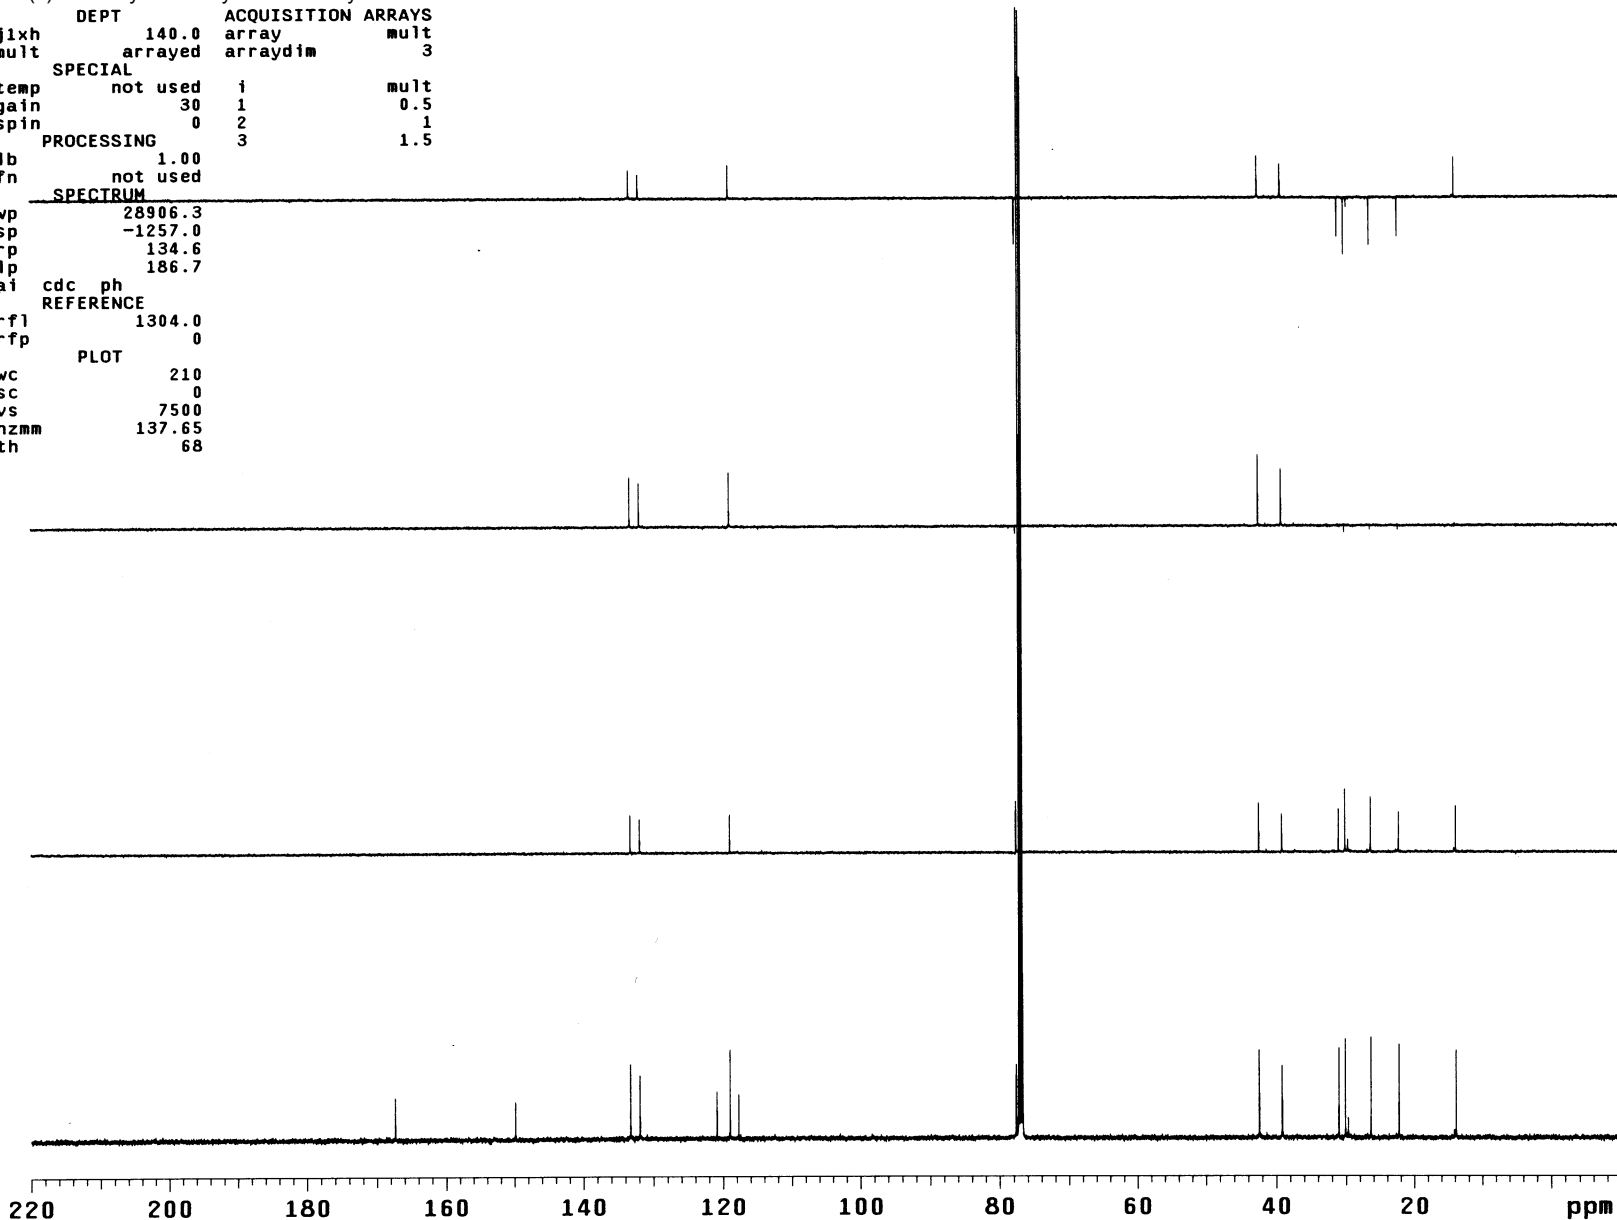

Fig S52. HSQC of compound trans-3e

# Supplementary Material (ESI) for Organic & Biomolecular Chemistry

PMK-02-37-1118 journal is (c) The Royal Society of Chemistry 2010

exp48 gHSQC

| SAMPLE         |            | FLAGS         | ACQUISITION | ARRAYS   |
|----------------|------------|---------------|-------------|----------|
| date           | May 6 2010 | hs            | n           | array    |
| solvent        | cdcl3      | sspul         | y           | arraydim |
| sample         | undefined  | PFgf1g        | y           | phase    |
| ACQUISITION    |            | hsglv1        | 1003        | 1        |
| sw             | 4490.3     | SPECIAL       | 1           | phase    |
| at             | 0.228      | temp          | not used    | 2        |
| np             | 2048       | gain          | 20          |          |
| fb             | not used   | spin          | 0           |          |
| ss             | 32         | GRADIENTS     |             |          |
| d1             | 1.000      | gzlv11        | 1003        |          |
| nt             | 16         | gt1           | 0.002000    |          |
| 2D ACQUISITION |            | gzlv13        | 505         |          |
| sw1            | 21367.5    | gt3           | 0.001000    |          |
| ni             | 128        | gstab         | 0.000500    |          |
| phase          | arrayed    | F2 PROCESSING |             |          |
| TRANSMITTER    |            | gf            | 0.105       |          |
| tn             | H1         | gfs           | not used    |          |
| sfrq           | 499.829    | fn            | 2048        |          |
| tof            | -250.0     | F1 PROCESSING |             |          |
| tpwr           | 58         | gf1           | 0.006       |          |
| pw             | 11.100     | gfs1          | not used    |          |
| DECOUPLER      |            | proc1         | 1p          |          |
| dn             | C13        | fn1           | 2048        |          |
| dof            | -2515.2    | DISPLAY       |             |          |
| dm             | nny        | sp            | 193.9       |          |
| dmm            | ccp        | wp            | 3762.4      |          |
| dmf            | 32258      | sp1           | 1053.0      |          |
| dpwr           | 36         | wp1           | 16526.4     |          |
| pxxlvl         | 52         | rfl           | 1850.5      |          |
| pxw            | 14.300     | rfl1          | 1833.9      |          |
| HSQC           |            | rfl11         | 6205.4      |          |
| j1xh           | 140.0      | rflp1         | 4921.3      |          |
| nullflg        | y          | PLOT          |             |          |
| mult           | 2          | wc            | 150.0       |          |
|                |            | sc            | 6.2         |          |
|                |            | wc2           | 116.2       |          |
|                |            | sc2           | 0           |          |
|                |            | vs            | 100         |          |
|                |            | th            | 5           |          |
|                |            | ai            | cdc         | ph       |

F2 (ppm)

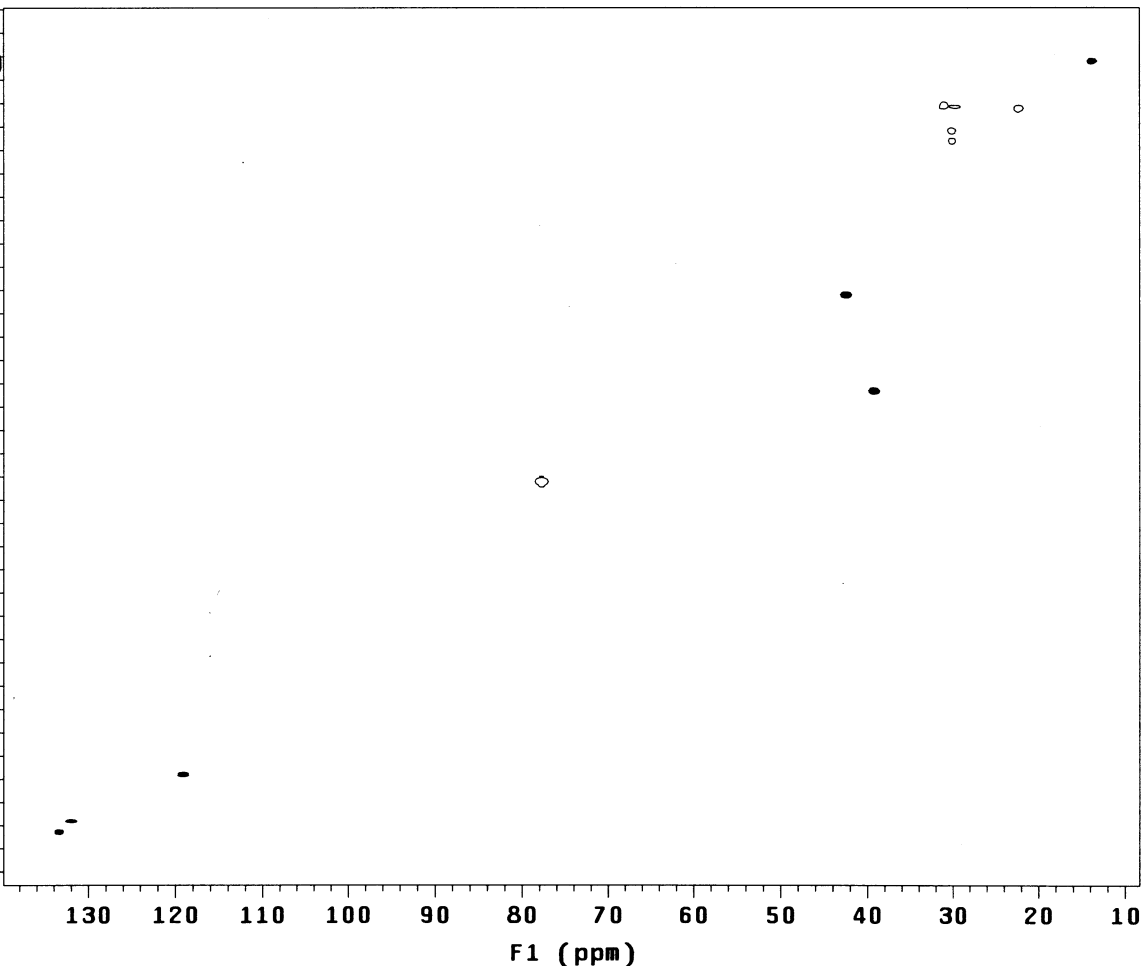

F1 (ppm)

Fig S53. COSY of compound trans-3e

# Supplementary Material (ESI) for Organic & Biomolecular Chemistry  
 PMK-02-37471-10 journal is (c) The Royal Society of Chemistry 2010

exp46 gCOSY

|                |            |               |          |
|----------------|------------|---------------|----------|
| date           | May 6 2010 | hs            | nn       |
| solvent        | cdcl3      | sspul         | n        |
| sample         | undefined  | hsglv1        | 1003     |
| ACQUISITION    |            | SPECIAL       |          |
| sw             | 4490.3     | temp          | not used |
| at             | 0.228      | gain          | 30       |
| np             | 2048       | spin          | 0        |
| fb             | not used   | F2 PROCESSING |          |
| ss             | 16         | sb            | -0.114   |
| d1             | 1.000      | sbs           | not used |
| nt             | 16         | fn            | 2048     |
| 2D ACQUISITION |            | F1 PROCESSING |          |
| sw1            | 4490.3     | sb1           | -0.029   |
| ni             | 128        | sbs1          | not used |
| TRANSMITTER    |            | procl         | lp       |
| tn             | H1         | fn1           | 2048     |
| sfrq           | 499.829    | DISPLAY       |          |
| tof            | -250.0     | sp            | 265.4    |
| tpwr           | 58         | wp            | 3630.9   |
| pw             | 11.100     | sp1           | 262.7    |
| GRADIENTS      |            | wp1           | 3630.9   |
| gzlv11         | 1003       | rf1           | 1849.1   |
| gt1            | 0.001000   | rff           | 1833.9   |
| gstab          | 0.000500   | rff1          | 1847.4   |
| DECOUPLER      |            | rffp1         | 1833.9   |
| dn             | C13        | PLOT          |          |
| dm             | nnn        | wc            | 155.0    |
|                |            | sc            | 10.0     |
|                |            | wc2           | 155.0    |
|                |            | sc2           | 0        |
|                |            | vs            | 100      |
|                |            | th            | 10       |
|                |            | ai            | cdc av   |

F2  
(ppm)

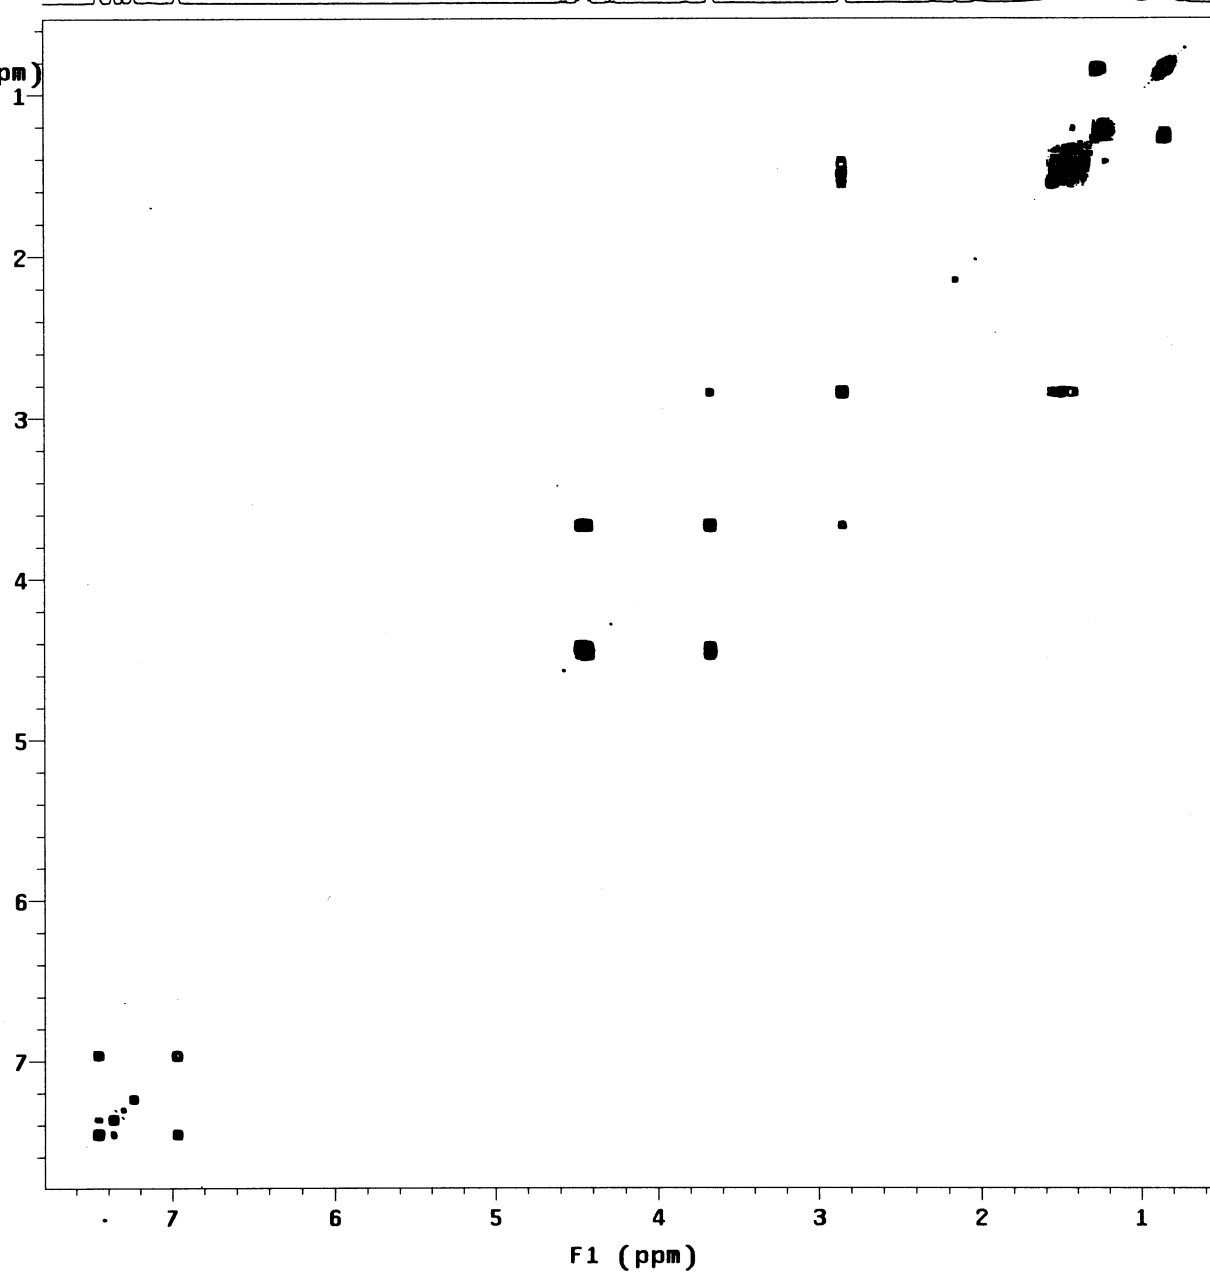

F1 (ppm)

Fig S54. NOESY of compound trans-3e

PMK-02371E12  
 # Supplementary Material (ESI) for Organic & Biomolecular Chemistry  
 # This journal is (c) The Royal Society of Chemistry 2010  
 exp47 NOESY

| SAMPLE         |            | FLAGS         |          |
|----------------|------------|---------------|----------|
| date           | May 6 2010 | hs            | n        |
| solvent        | cdcl3      | sspul         | y        |
| sample         | undefined  | PFGflg        | y        |
| ACQUISITION    |            | hsglvt        | 1003     |
| sw             | 4490.3     | SPECIAL       |          |
| at             | 0.228      | temp          | not used |
| np             | 2048       | gain          | 30       |
| fb             | not used   | spin          | 0        |
| ss             | 32         | F2 PROCESSING |          |
| d1             | 1.000      | gf            | 0.105    |
| nt             | 16         | gfs           | not used |
| 2D ACQUISITION |            | fn            | 2048     |
| sw1            | 4490.3     | F1 PROCESSING |          |
| ni             | 200        | gf1           | 0.041    |
| TRANSMITTER    |            | gfs1          | not used |
| tn             | H1         | proc1         | lp       |
| sfrq           | 499.829    | fn1           | 2048     |
| tof            | -250.0     | DISPLAY       |          |
| tpwr           | 58         | sp            | 248.2    |
| pw             | 11.100     | wp            | 3600.2   |
| NOESY          |            | sp1           | 253.2    |
| mix            | 0.600      | wp1           | 3600.2   |
| PRESATURATION  |            | rfl           | 1848.8   |
| satmode        | nnnn       | rfp           | 1833.9   |
| satpwr         | 0          | rfl1          | 1848.1   |
| satdly         | 0          | rfp1          | 1833.9   |
| satfrq         | 0          | PLOT          |          |
| DECOUPLER      |            | wc            | 155.0    |
| dn             | C13        | sc            | 10.0     |
| dm             | nnn        | wc2           | 155.0    |
|                |            | sc2           | 0        |
|                |            | vs            | 100      |
|                |            | th            | 1        |
|                |            | ai            | ph       |

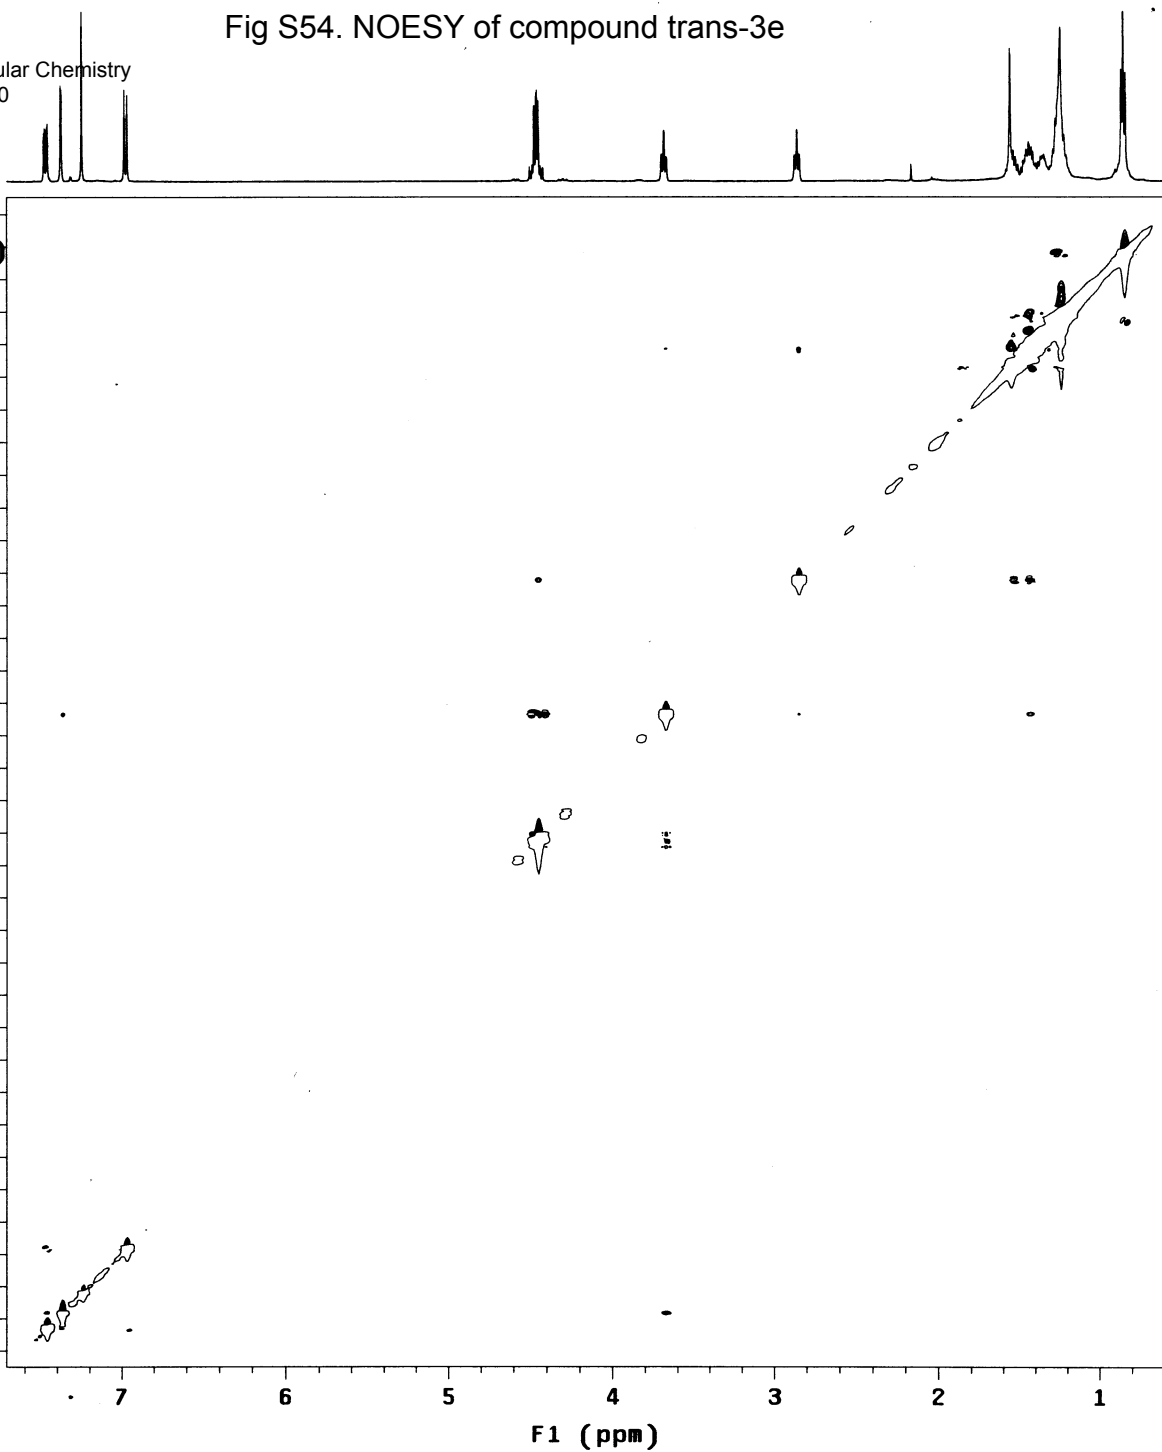

Fig S55. <sup>1</sup>H NMR (CDCl<sub>3</sub>, 500 MHz) of compound 3f

PMK-02-375

exp23 s2p1 # Supplementary Material for Organic Chemistry 2019  
 # This journal is (c) The Royal Society of Chemistry 2019

SAMPLE DEC. 14 VT

date May 11 2010 dfrq 125.693  
 solvent cdc13 dn C13  
 file exp dpwr 30  
 ACQUISITION dof 0  
 sfrq 499.830 dm nnn  
 tn H1 dmm c  
 at 3.000 dmf 200  
 np 48000 dseq  
 sw 8000.0 dres 1.0  
 fb not used homo n  
 bs 4  
 tpwr 58  
 pw 4.8  
 d1 1.000  
 tof 499.7  
 nt 4  
 ct 4  
 alock y  
 gain not used  
 FLAGS  
 il n  
 in n  
 dp y  
 hs nn

DISPLAY  
 sp -250.1  
 wp 5498.0  
 vs 50  
 sc 0  
 wc 210  
 hzmm 26.18  
 is 238.73  
 rfl 4637.9  
 rfp 3618.7  
 th 5  
 ins 100.000  
 nm cdc ph

PROCESSING  
 wtfile  
 proc ft  
 fn not used  
 math f  
 werr react  
 wexp procplot  
 wbs  
 wnt wft

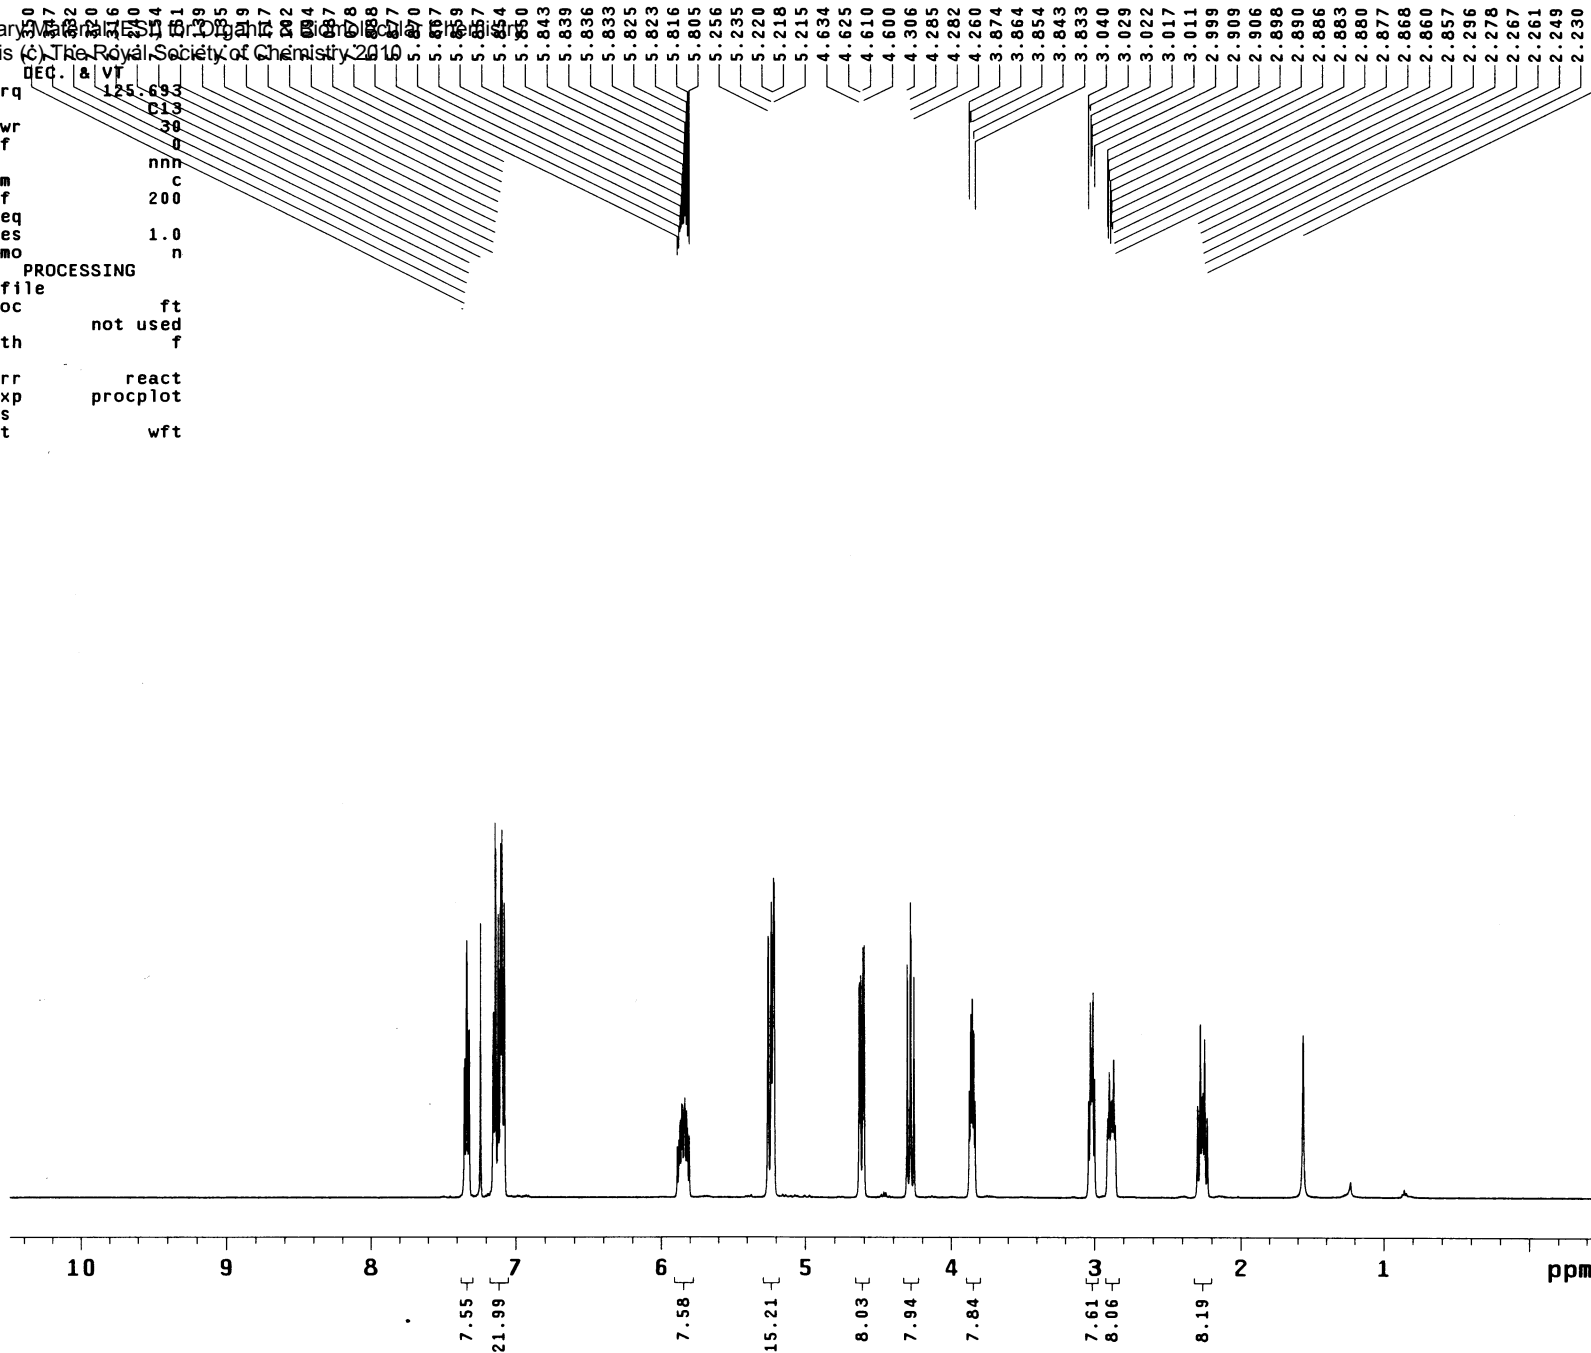

Fig S56. <sup>13</sup>C NMR (CDCl<sub>3</sub>, 125 MHz) of compound 3f

PMK-02-375 # Supplementary Material (ESI) for Organic & Biomolecular Chemistry  
 exp24 s2pu# This journal is (c) The Royal Society of Chemistry 2010

```

SAMPLE          DEC. & VT
date May 11 2010 dfrq      499.829
solvent cdc13      dn       H1
file      exp      dpwr     39
ACQUISITION    dof       0
sfrq      125.696 dm       yyy
tn         C13      dmm     w
at         1.000 dmf     11905
np         62894 dseq
sw         31446.5 dres     1.0
fb         not used homo
bs         16
ss         2        PROCESSING
tpwr       54      lb      1.00
pw         4.0     proc
d1         1.000  fn      not used
tof        2512.2 math     f
nt         1024
ct         1024  werr     react
alock      y      wexp    procplot
gain      not used wbs     testsn
          FLAGS   wnt
il         n
in         n
dp         y
hs         nn
DISPLAY
sp        -1257.0
wp        28906.3
vs        100
sc        0
wc        210
hzmm     137.65
is        500.00
rfl      10983.4
rfp      9677.5
th        9
ins      100.000
nm cdc ph
    
```

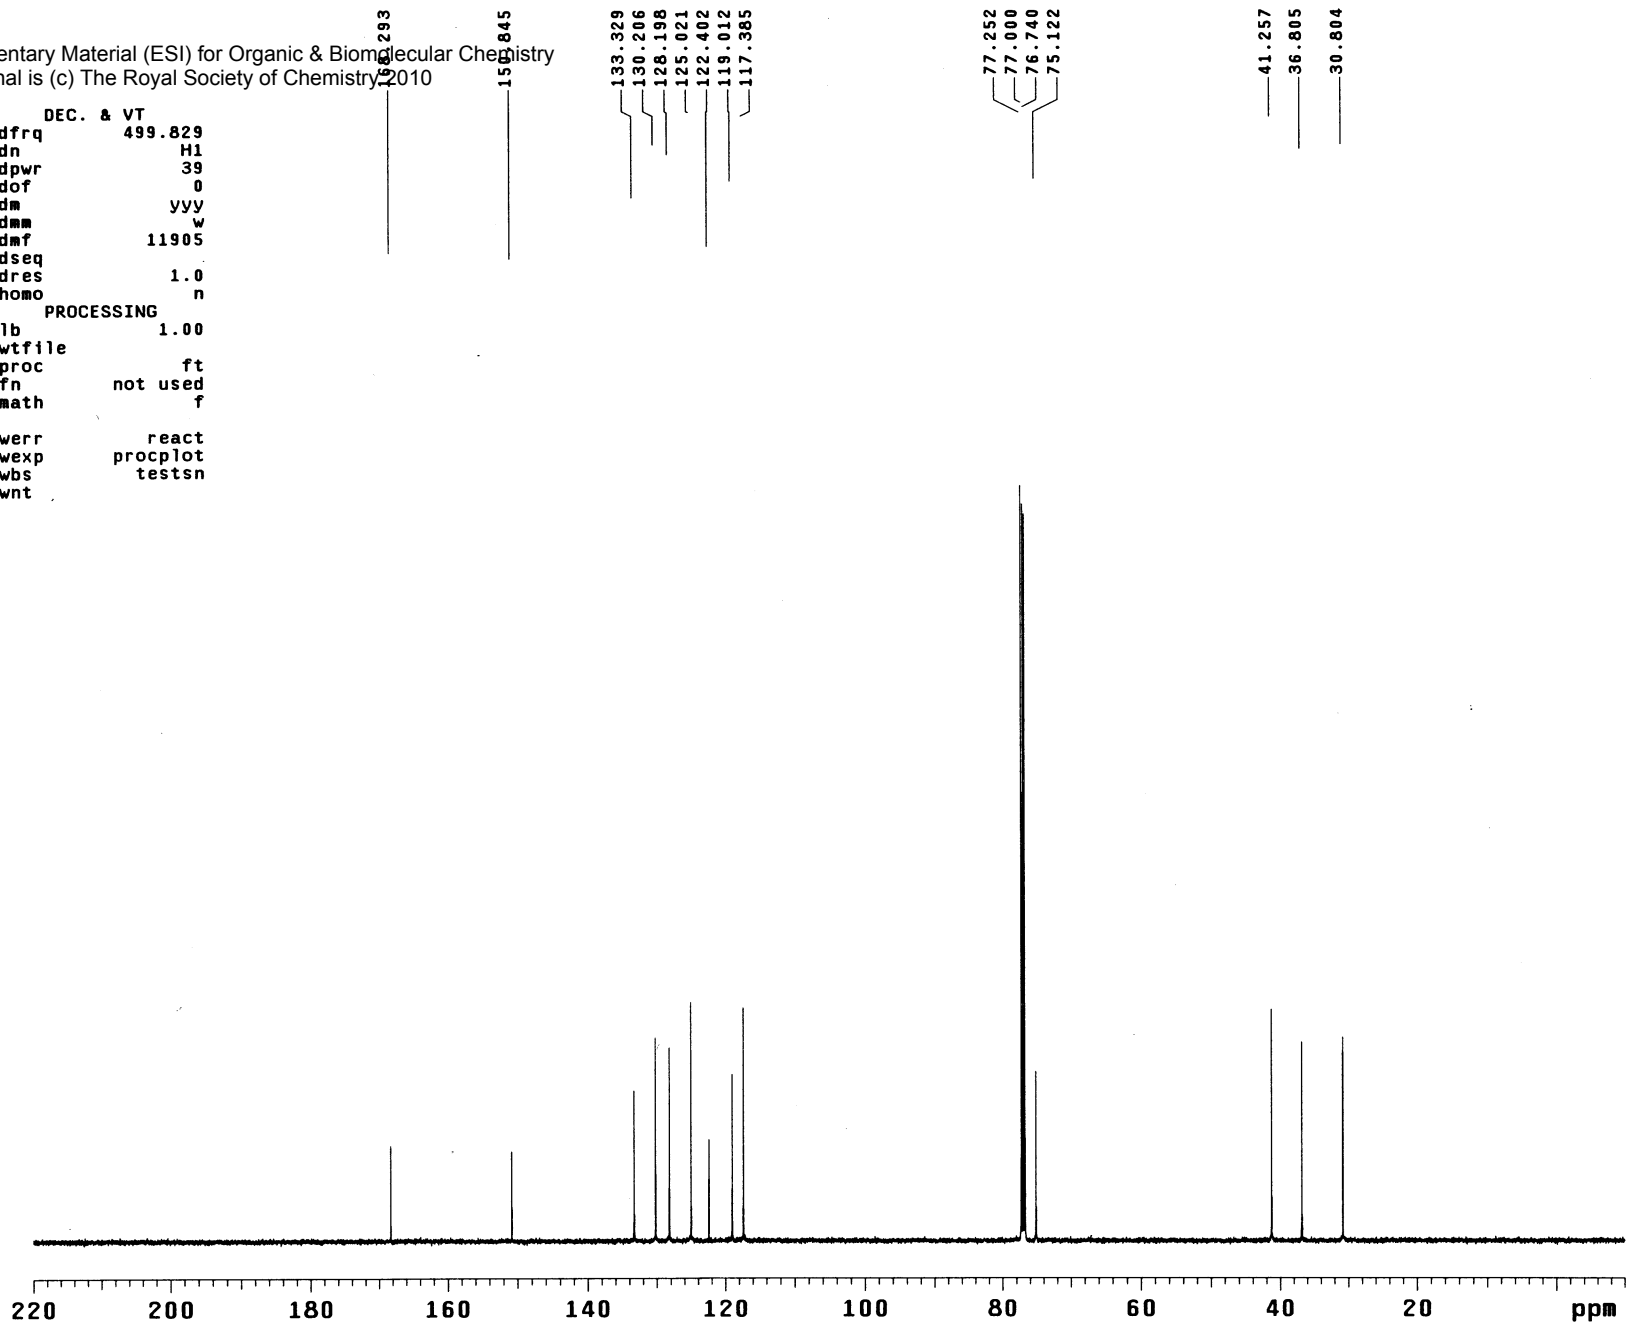



Fig S57. DEPT of compound 3f

PMK-02-#73 Supplementary Material (ESI) for Organic & Biomolecular Chemistry  
 # This journal is (c) The Royal Society of Chemistry 2010  
 exp25 DEPT

| SAMPLE      |             | DEPT       |          | ACQUISITION ARRAYS |      |
|-------------|-------------|------------|----------|--------------------|------|
| date        | May 11 2010 | j1xh       | 140.0    | array              | mult |
| solvent     | cdcl3       | mult       | arrayed  | arraydim           | 3    |
| sample      | undefined   | SPECIAL    |          |                    |      |
| ACQUISITION |             | temp       | not used | i                  | mult |
| sw          | 31446.5     | gain       | 28       | 1                  | 0.5  |
| at          | 1.000       | spin       | 0        | 2                  | 1    |
| np          | 62894       | PROCESSING |          | 3                  | 1.5  |
| bs          | 16          | lb         | 1.00     |                    |      |
| ss          | -4          | fn         | not used |                    |      |
| d1          | 1.000       | SPECTRUM   |          |                    |      |
| nt          | 1024        | wp         | 28906.3  |                    |      |
| ct          | 1024        | sp         | -1257.0  |                    |      |
| TRANSMITTER |             | rp         | 135.9    |                    |      |
| tn          | C13         | lp         | 204.1    |                    |      |
| tof         | 2512.2      | ai         | cdc ph   |                    |      |
| tpwr        | 54          | REFERENCE  |          |                    |      |
| pw          | 11.500      | rfl        | 1305.0   |                    |      |
| DECOUPLER   |             | rfp        | 0        |                    |      |
| dn          | H1          | PLOT       |          |                    |      |
| dof         | 0           | wc         | 210      |                    |      |
| dpwr        | 39          | sc         | 0        |                    |      |
| dm          | nny         | vs         | 100      |                    |      |
| dmm         | ccw         | hzmm       | 137.65   |                    |      |
| dmf         | 11905       | th         | 68       |                    |      |
| pp1v1       | 51          |            |          |                    |      |
| pp          | 28.000      |            |          |                    |      |

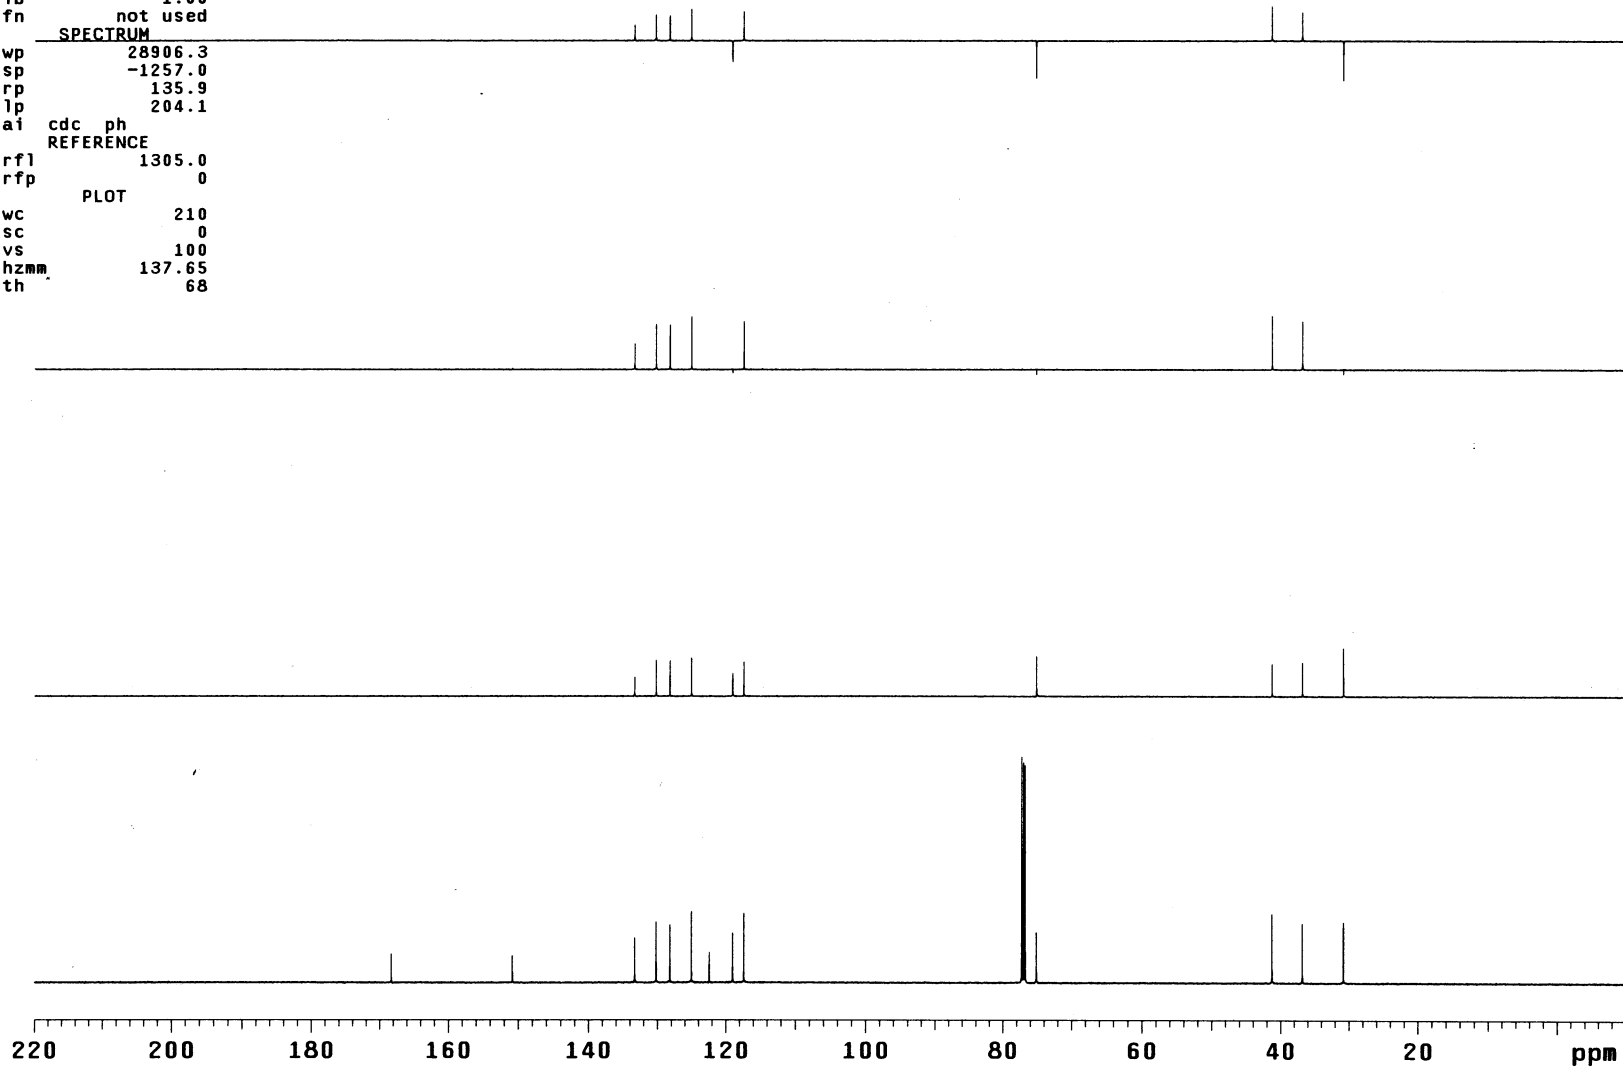

Fig S58. HSQC of compound 3f

PMK-02-32 Supplementary Material (ESI) for Organic & Biomolecular Chemistry  
 # This journal is (c) The Royal Society of Chemistry 2010

exp28 gHSQC

| SAMPLE           | FLAGS         | ACQUISITION | ARRAYS |
|------------------|---------------|-------------|--------|
| date May 11 2010 | hs            | n           | phase  |
| solvent cdc13    | sspul         | y           | 256    |
| sample undefined | PFGflg        | y           |        |
| ACQUISITION      | hsglvi        | 1003        | phase  |
| sw 4490.3        | SPECIAL       | 1           | 1      |
| at 0.228         | temp          | not used    | 2      |
| np 2048          | gain          | 20          |        |
| fb not used      | spin          | 0           |        |
| ss 32            | GRADIENTS     |             |        |
| d1 1.000         | gzlv11        | 1003        |        |
| nt 8             | gt1           | 0.002000    |        |
| 2D ACQUISITION   | gzlv13        | 505         |        |
| sw1 21367.5      | gt3           | 0.001000    |        |
| ni 128           | gstab         | 0.000500    |        |
| phase arrayed    | F2 PROCESSING |             |        |
| TRANSMITTER      | gf            | 0.105       |        |
| tn H1            | gfs           | not used    |        |
| sfrq 499.829     | fn            | 2048        |        |
| tof -250.0       | F1 PROCESSING |             |        |
| tpwr 58          | gf1           | 0.006       |        |
| pw 11.100        | gfs1          | not used    |        |
| DECOUPLER        | procl         | lp          |        |
| dn C13           | fn1           | 2048        |        |
| dof -2515.2      | DISPLAY       |             |        |
| dm nny           | sp            | 908.1       |        |
| dmm ccp          | wp            | 3109.0      |        |
| dmf 32258        | sp1           | 3004.7      |        |
| dpwr 36          | wp1           | 14523.2     |        |
| pwxlvl 52        | rfl           | 2154.1      |        |
| pw 14.300        | rfp           | 2141.3      |        |
| HSQC             | rfl1          | 10735.3     |        |
| j1xh 140.0       | rfp1          | 9441.5      |        |
| nullflg y        | PLOT          |             |        |
| mult 2           | wc            | 150.0       |        |
|                  | sc            | 6.2         |        |
|                  | wc2           | 116.2       |        |
|                  | sc2           | 0           |        |
|                  | vs            | 100         |        |
|                  | th            | 5           |        |
|                  | ai            | cdc         | ph     |

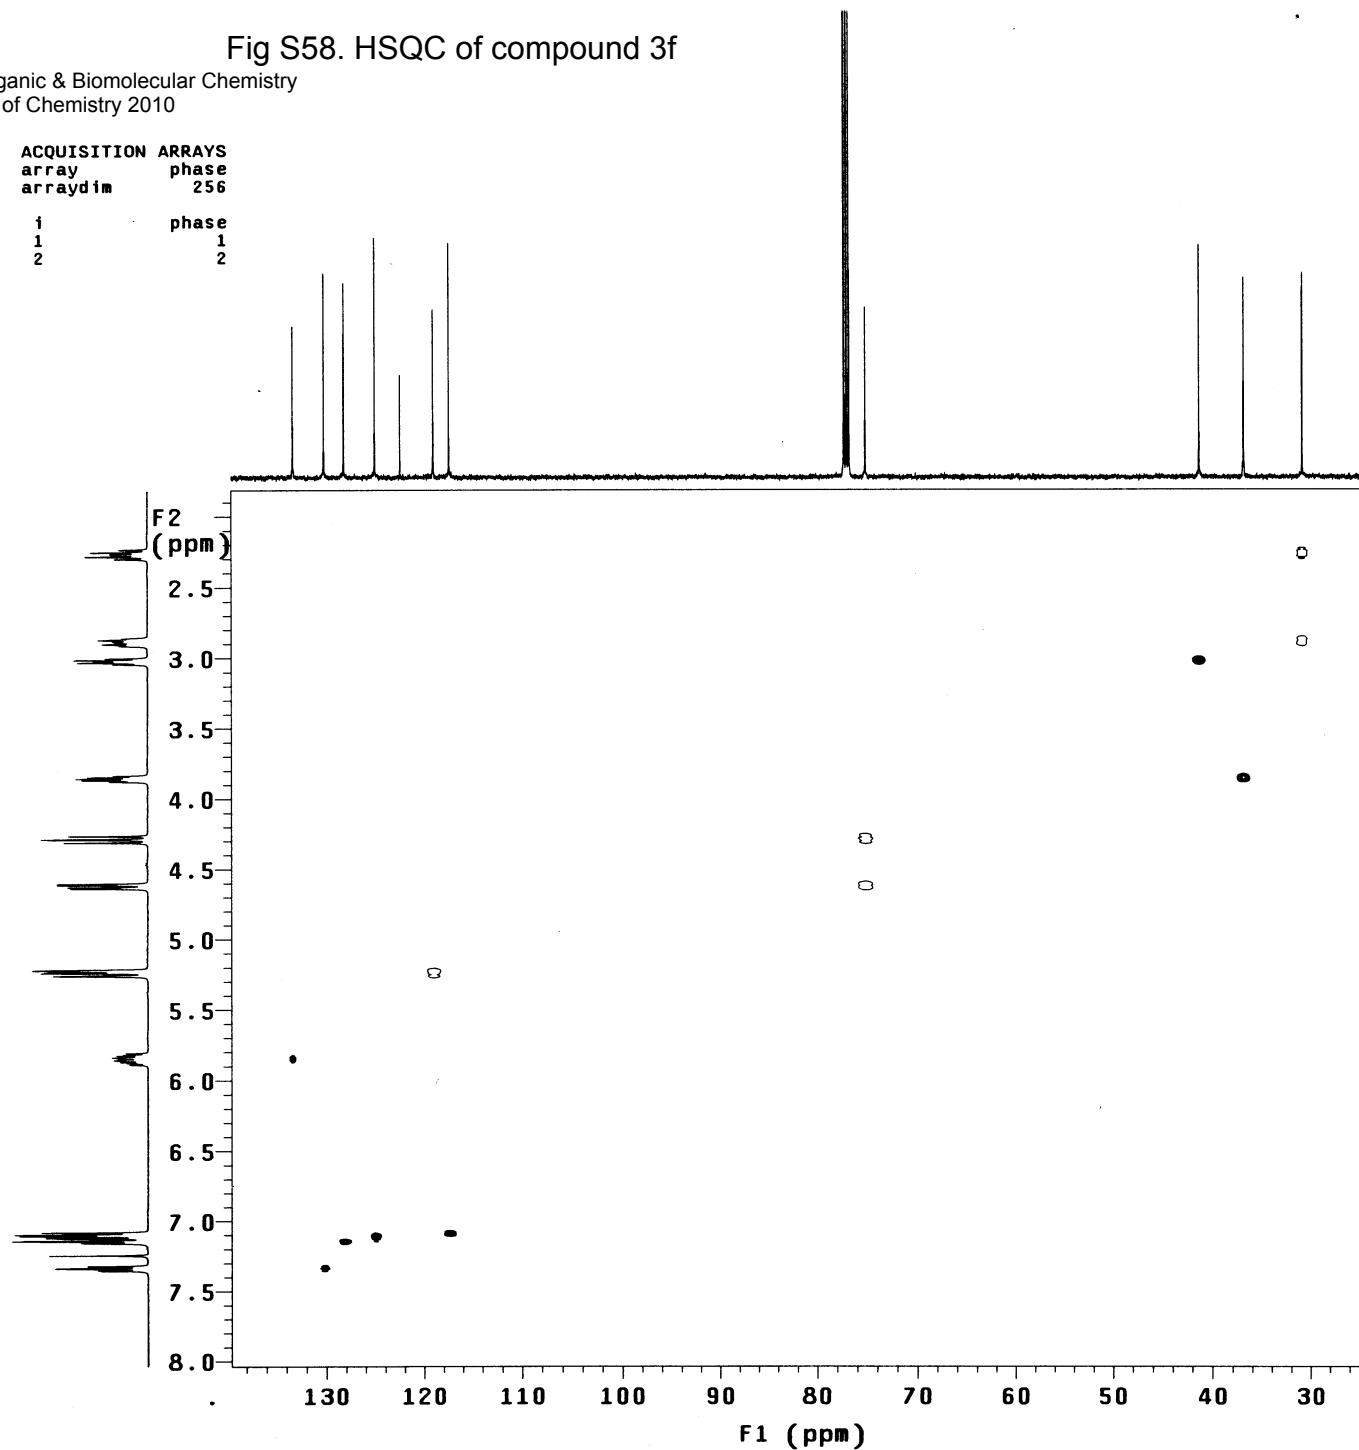

Fig S59. COSY of compound 3f

PMK-02-375  
 # Supplementary Material (ESI) for Organic & Biomolecular Chemistry  
 exp26 g035  
 This journal is (c) The Royal Society of Chemistry 2010

|                |             |               |          |
|----------------|-------------|---------------|----------|
| SAMPLE         |             | FLAGS         |          |
| date           | May 11 2010 | hs            | nn       |
| solvent        | cdc13       | sspul         | nn       |
| sample         | undefined   | hsglv1        | 1003     |
| ACQUISITION    |             | SPECIAL       |          |
| sw             | 4490.3      | temp          | not used |
| at             | 0.228       | gain          | 28       |
| np             | 2048        | spin          | 0        |
| fb             | not used    | F2 PROCESSING |          |
| ss             | 16          | sb            | -0.114   |
| d1             | 1.000       | sbs           | not used |
| nt             | 8           | fn            | 2048     |
| 2D ACQUISITION |             | F1 PROCESSING |          |
| sw1            | 4490.3      | sb1           | -0.029   |
| ni             | 128         | sbs1          | not used |
| TRANSMITTER    |             | proc1         |          |
| tn             | H1          | fn1           | 2048     |
| sfrq           |             | DISPLAY       |          |
| tof            | 499.829     | sp            | 927.8    |
| tpwr           | -250.0      | wp            | 2911.7   |
| pw             | 58          | sp1           | 929.0    |
| GRADIENTS      |             | wp1           |          |
| gzlv1          | 11.100      | rf1           | 2907.3   |
| gt1            | 1003        | rfl           | 2156.2   |
| gstab          | 0.001000    | rfl1          | 2141.3   |
| DECOUPLER      |             | rfl1          |          |
| dn             | C13         | rfl1          | 2155.1   |
| dm             | nnn         | rfl1          | 2141.2   |
|                |             | PLOT          |          |
|                |             | wc            | 155.0    |
|                |             | sc            | 10.0     |
|                |             | wc2           | 155.0    |
|                |             | sc2           | 0        |
|                |             | vs            | 100      |
|                |             | th            | 7        |
|                |             | ai            | cdc av   |

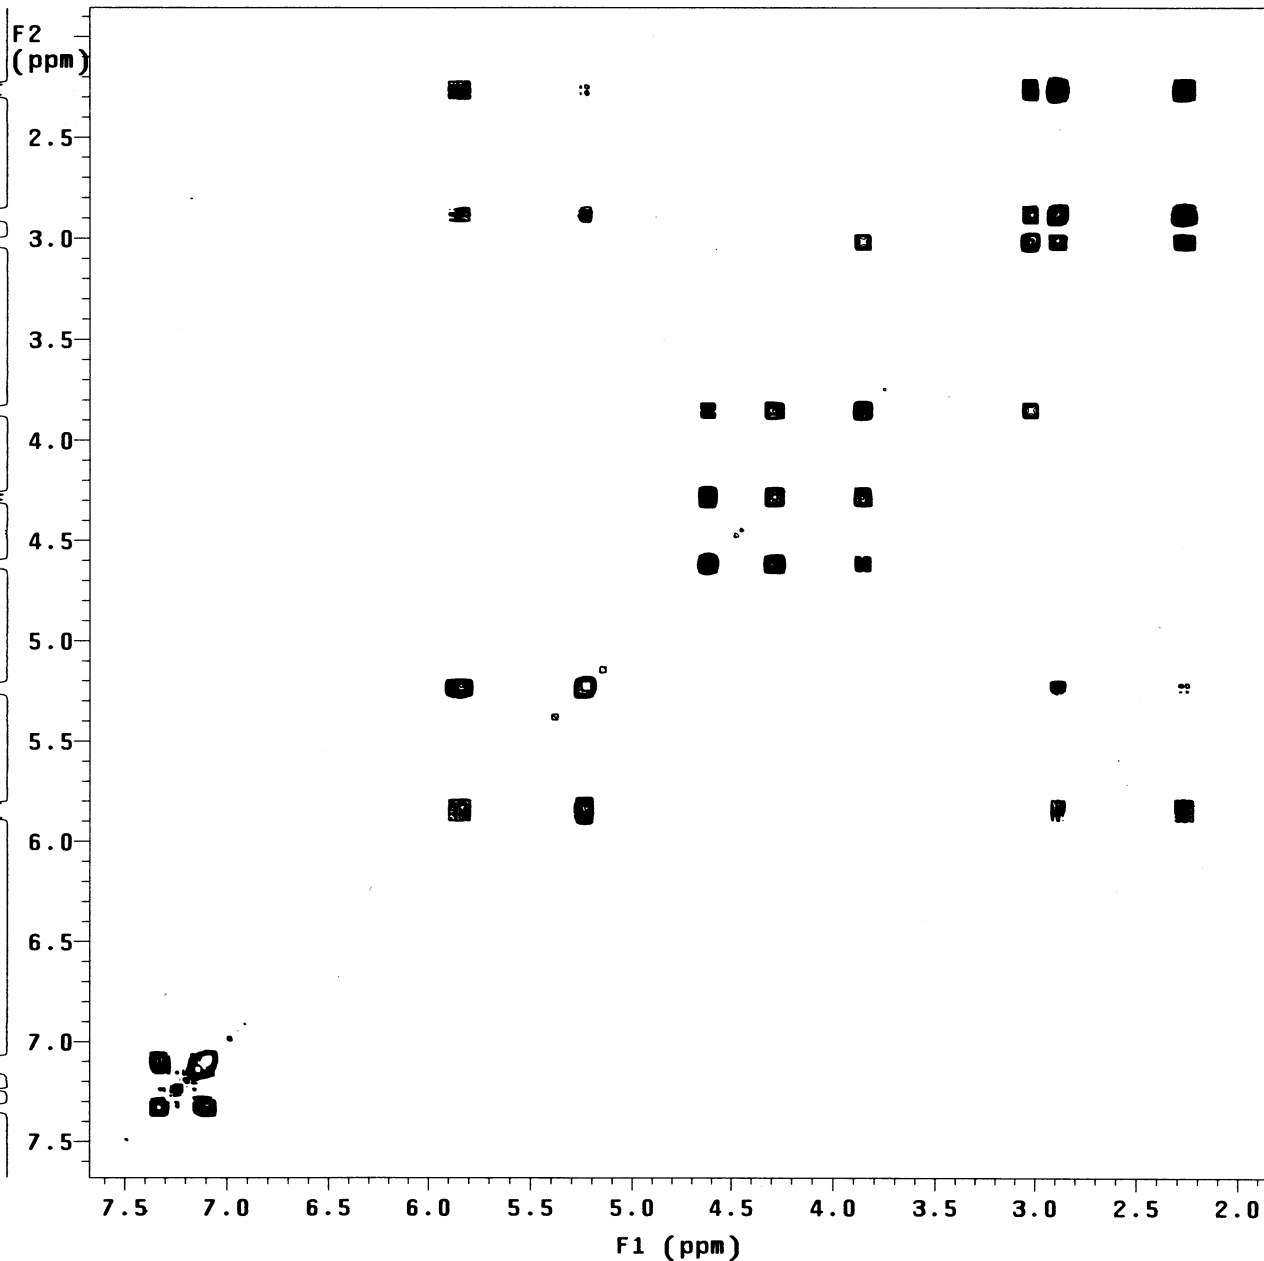

Fig S60. NOESY of compound 3f

PMK-02-# Supplementary Material (ESI) for Organic & Biomolecular Chemistry  
 # This journal is (c) The Royal Society of Chemistry 2010  
 exp27 NOESY

| SAMPLE         |             | FLAGS         |          |
|----------------|-------------|---------------|----------|
| date           | May 11 2010 | hs            | n        |
| solvent        | cdcl3       | sspul         | y        |
| sample         | undefined   | PFGflg        | y        |
| ACQUISITION    |             | hsglvi        | 1003     |
| sw             | 4490.3      | SPECIAL       |          |
| at             | 0.228       | temp          | not used |
| np             | 2048        | gain          | 28       |
| fb             | not used    | spin          | 0        |
| ss             | 32          | F2 PROCESSING |          |
| d1             | 1.000       | gf            | 0.105    |
| nt             | 8           | gfs           | not used |
| 2D ACQUISITION |             | fn            | 2048     |
| sw1            | 4490.3      | F1 PROCESSING |          |
| ni             | 200         | gf1           | 0.041    |
| TRANSMITTER    |             | gfs1          | not used |
| tn             | H1          | procl         | 1p       |
| sfrq           | 499.829     | fn1           | 2048     |
| tof            | -250.0      | DISPLAY       |          |
| tpwr           | 58          | sp            | 945.6    |
| pw             | 11.100      | wp            | 2946.8   |
| NOESY          |             | sp1           | 946.5    |
| mix            | 0.600       | wp1           | 2946.8   |
| PRESATURATION  |             | rf1           | 2156.0   |
| satmode        | nnnn        | rfp           | 2141.3   |
| satpwr         | 0           | rf11          | 2155.1   |
| satdly         | 0           | rfp1          | 2141.2   |
| satfrq         | 0           | PLOT          |          |
| DECOUPLER      |             | wc            | 155.0    |
| dn             | C13         | sc            | 10.0     |
| dm             | nnn         | wc2           | 155.0    |
|                |             | sc2           | 0        |
|                |             | vs            | 100      |
|                |             | th            | z        |
|                |             | ai            | ph       |

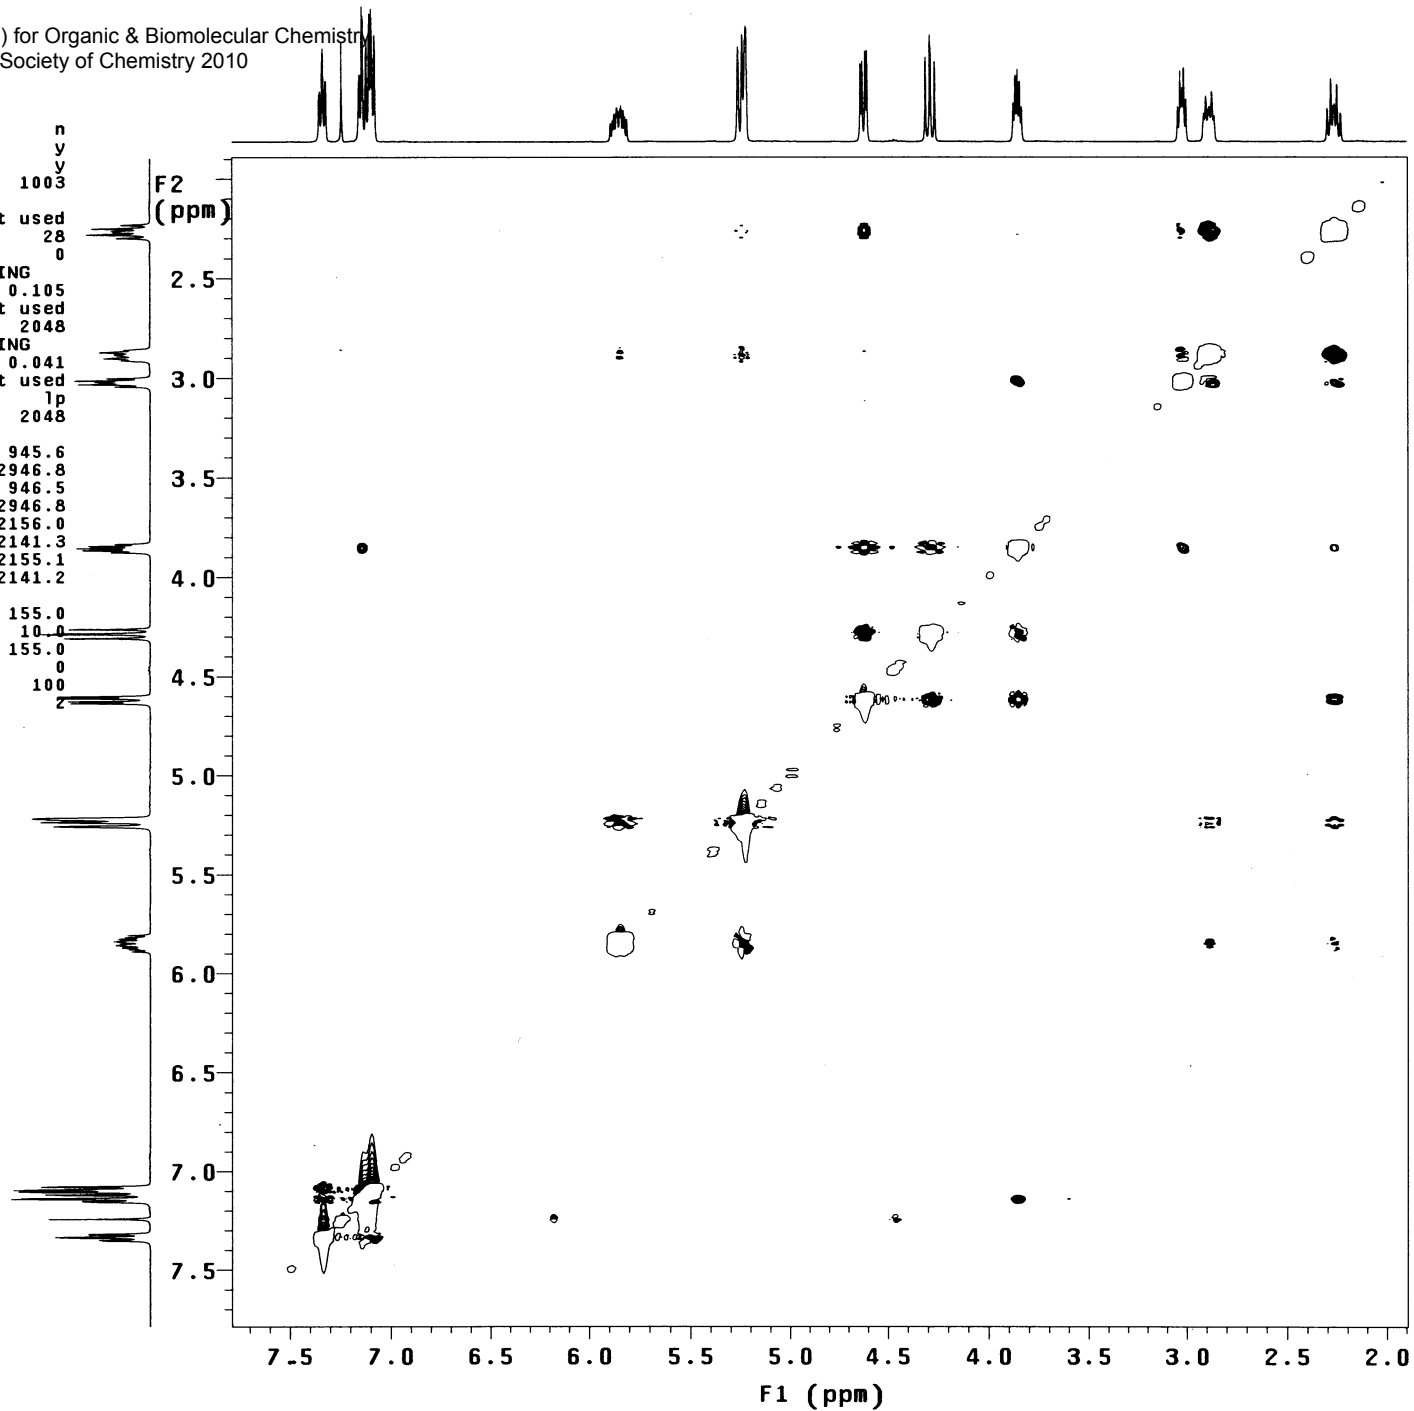

Fig S61. 1H NMR (CDCl3, 500 MHz) of compound 3g

PMK-02-379

# Supplementary Material (ESI) for Organic & Biomolecular Chemistry  
 # This journal is (c) The Royal Society of Chemistry 2010

|             |             |            |           |
|-------------|-------------|------------|-----------|
| exp3        | s2bu1       | SAMPLE     | DEC. & VT |
| date        | May 22 2010 | dfrq       | 125.693   |
| solvent     | cdc13       | dn         | C13       |
| file        | exp         | dpwr       | 30        |
| ACQUISITION |             | dof        | 0         |
| sfrq        | 499.830     | dm         | nnn       |
| tn          | H1          | dmm        | c         |
| at          | 3.000       | dmf        | 200       |
| np          | 48000       | dseq       |           |
| sw          | 8000.0      | dres       | 1.0       |
| fb          | not used    | homo       | n         |
| bs          | 4           | PROCESSING |           |
| tpwr        | 58          | wtfile     |           |
| pw          | 4.8         | proc       | ft        |
| d1          | 1.000       | fn         | not used  |
| tof         | 499.7       | math       | f         |
| nt          | 4           |            |           |
| ct          | 4           | werr       | react     |
| alock       | y           | wexp       | procplot  |
| gain        | not used    | wbs        |           |
| FLAGS       |             | wnt        | wft       |
| il          | n           |            |           |
| in          | n           |            |           |
| dp          | y           |            |           |
| hs          | nn          |            |           |
| DISPLAY     |             |            |           |
| sp          | -250.1      |            |           |
| wp          | 5498.0      |            |           |
| vs          | 100         |            |           |
| sc          | 0           |            |           |
| wc          | 210         |            |           |
| hzmm        | 26.18       |            |           |
| is          | 359.31      |            |           |
| rfl         | 4637.9      |            |           |
| rfp         | 3618.7      |            |           |
| th          | 5           |            |           |
| ins         | 100.000     |            |           |
| nm          | cdc ph      |            |           |

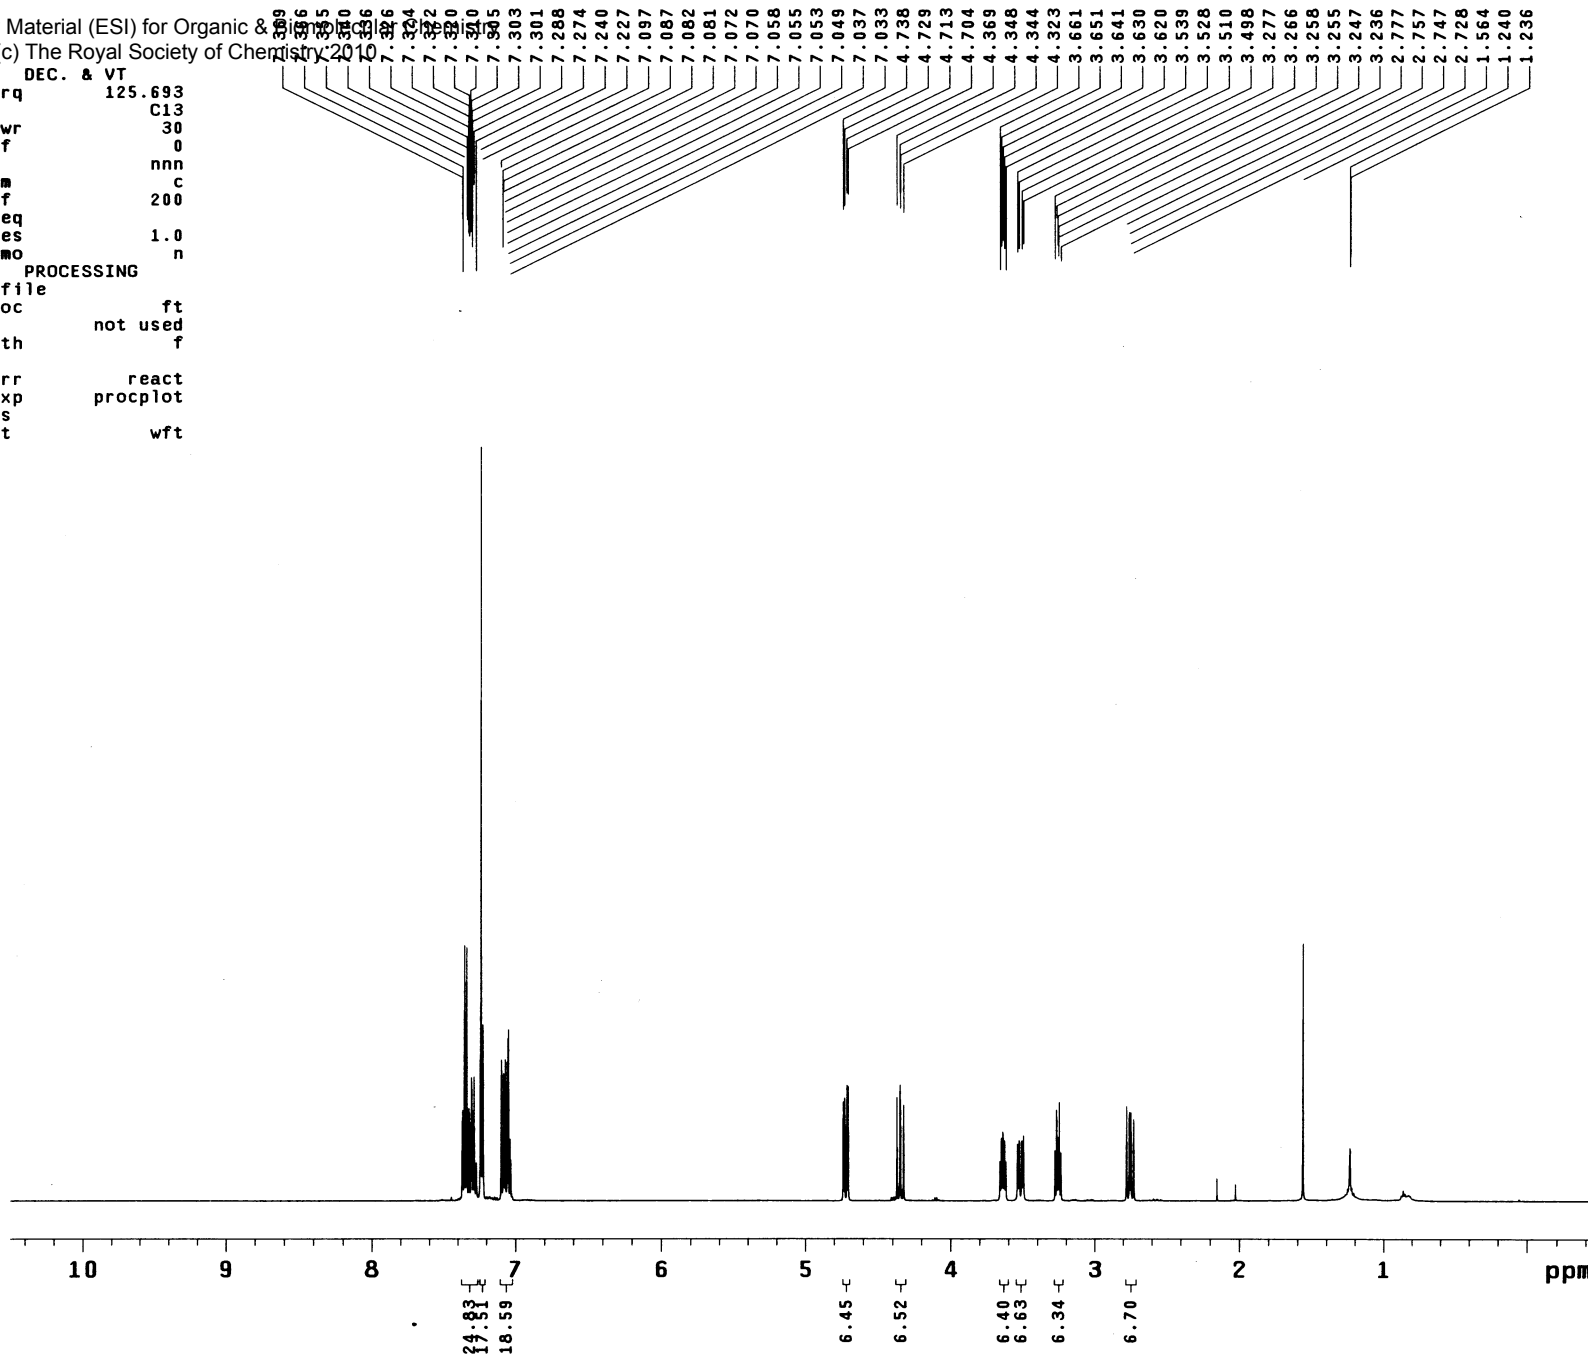

Fig S62. <sup>13</sup>C NMR (CDCl<sub>3</sub>, 125 MHz) of compound 3g

PMK-02-378  
 # Supplementary Material (ESI) for Organic & Biomolecular Chemistry  
 exp4 s2pu This journal is (c) The Royal Society of Chemistry 2015

|             |             |            |          |
|-------------|-------------|------------|----------|
| SAMPLE      |             | DEC. & VT  |          |
| date        | May 22 2010 | dfrq       | 499.829  |
| solvent     | cdcl3       | dn         | H1       |
| file        | exp         | dpwr       | 39       |
| ACQUISITION |             | doF        | 0        |
| sfrq        | 125.696     | dm         | yyy      |
| tn          | C13         | dmm        | w        |
| at          | 1.000       | dmf        | 11905    |
| np          | 62894       | dseq       |          |
| sw          | 31446.5     | dres       | 1.0      |
| fb          | not used    | homo       | n        |
| bs          | 16          | PROCESSING |          |
| ss          | 2           | lb         | 1.00     |
| tpwr        | 54          | wtfile     |          |
| pw          | 4.0         | proc       | ft       |
| d1          | 1.000       | fn         | not used |
| tof         | 2512.2      | math       | f        |
| nt          | 1024        |            |          |
| ct          | 816         | werr       | react    |
| alock       | y           | wexp       | procplot |
| gain        | not used    | wbs        | testsn   |
| FLAGS       |             | wnt        |          |
| il          | n           |            |          |
| in          | n           |            |          |
| dp          | y           |            |          |
| hs          | nn          |            |          |
| DISPLAY     |             |            |          |
| sp          | -1257.0     |            |          |
| wp          | 28906.3     |            |          |
| vs          | 100         |            |          |
| sc          | 0           |            |          |
| wc          | 210         |            |          |
| hzmm        | 137.65      |            |          |
| is          | 500.00      |            |          |
| rfl         | 10983.4     |            |          |
| rfp         | 9677.5      |            |          |
| th          | 7           |            |          |
| ins         | 100.000     |            |          |
| nm          | cdc ph      |            |          |

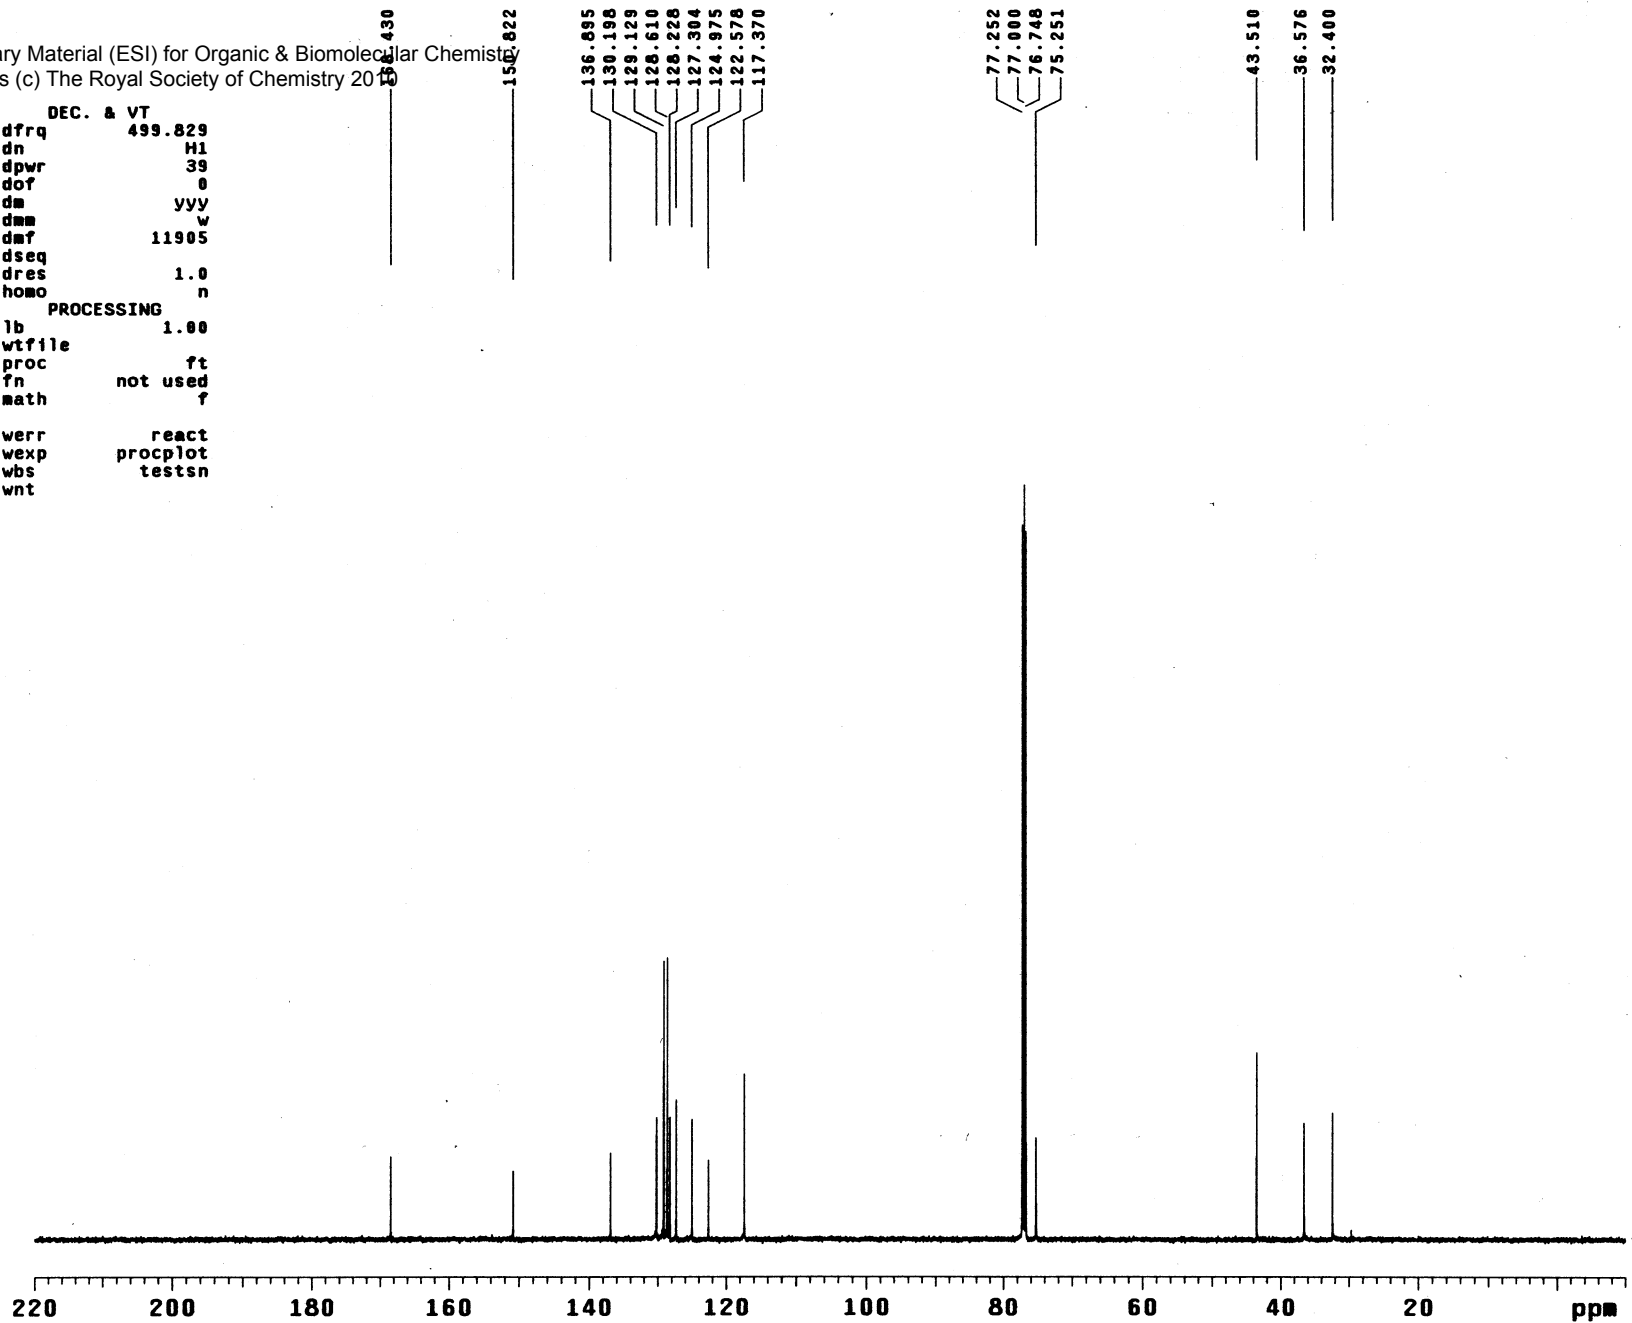

Fig S63. DEPT of compound 3g

PMK-02-379 # Supplementary Material (ESI) for Organic & Biomolecular Chemistry

exp5 DEPT# This journal is (c) The Royal Society of Chemistry 2010

|                  |               |             |        |
|------------------|---------------|-------------|--------|
| SAMPLE           | DEPT          | ACQUISITION | ARRAYS |
| date May 22 2010 | j1xh 140.0    | array       | mult   |
| solvent cdcl3    | mult arrayed  | arraydia    | 3      |
| sample undefined | SPECIAL       |             |        |
| ACQUISITION      | temp not used | 1           | mult   |
| sw 31446.5       | gain 28       | 1           | 0.5    |
| at 1.000         | spin 0        | 2           | 1      |
| np 62894         | PROCESSING    | 3           | 1.5    |
| bs 16            | lb 1.00       |             |        |
| ss -4            | fn not used   |             |        |
| d1 1.000         | SPECTRUM      |             |        |
| nt 1024          | wp 28906.3    |             |        |
| ct 1024          | sp -1257.0    |             |        |
| TRANSMITTER      | rp 127.5      |             |        |
| tn C13           | lp 214.0      |             |        |
| tof 2512.2       | ai cdc ph     |             |        |
| tpwr 54          | REFERENCE     |             |        |
| pw 11.500        | rfl 1306.0    |             |        |
| DECOUPLER        | rpf 0         |             |        |
| dn H1            | PLOT          |             |        |
| dof 0            | wc 210        |             |        |
| dpwr 39          | sc 0          |             |        |
| dm nny           | vs 100        |             |        |
| dmm ccw          | hzmm 137.65   |             |        |
| dmf 11905        | th 68         |             |        |
| pplvl 51         |               |             |        |
| pp 28.000        |               |             |        |

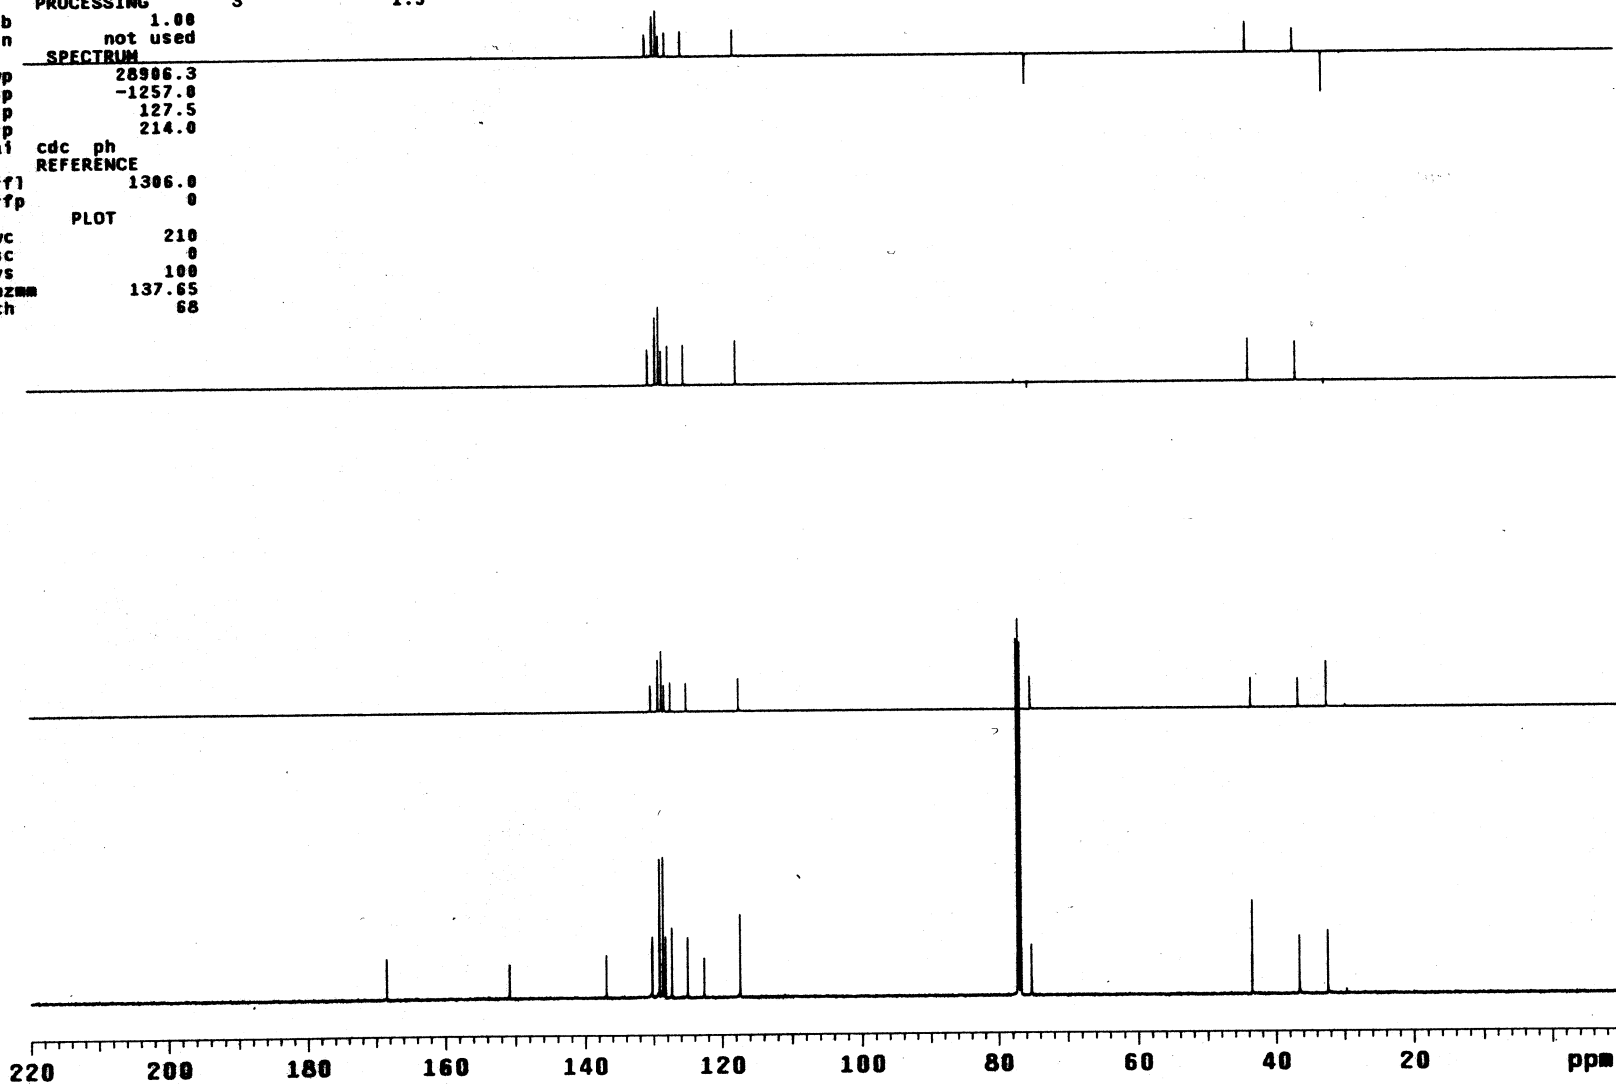

Fig S64. HSQC of compound 3g

PMK-02-3# Supplementary Material (ESI) for Organic & Biomolecular Chemistry

# This journal is (c) The Royal Society of Chemistry 2010

exp8 gHSQC

| SAMPLE           | FLAGS          | ACQUISITION | ARRAYS   |
|------------------|----------------|-------------|----------|
| date May 22 2010 | hs             | n           | array    |
| solvent cdc13    | sspul          | y           | arraydim |
| sample undefined | PFGf1g         | y           | phase    |
| ACQUISITION      | hsglv1         | 1003        | 1        |
| sw 4490.3        | SPECIAL        | 1           | 1        |
| at 0.228         | temp not used  | 2           | 2        |
| np 2048          | gain 20        |             |          |
| fb not used      | spin 0         |             |          |
| ss 32            | GRADIENTS      |             |          |
| d1 1.000         | gzlv11 1003    |             |          |
| nt 8             | gt1 0.002000   |             |          |
| 2D ACQUISITION   | gzlv13 505     |             |          |
| sw1 21367.5      | gt3 0.001000   |             |          |
| n1 128           | gstab 0.000500 |             |          |
| phase arrayed    | F2 PROCESSING  |             |          |
| TRANSMITTER      | gf 0.105       |             |          |
| tn H1            | gfs not used   |             |          |
| sfrq 499.829     | fn 2048        |             |          |
| tof -250.0       | F1 PROCESSING  |             |          |
| tpwr 58          | gf1 0.006      |             |          |
| pw 11.100        | gfs1 not used  |             |          |
| BECOUPLER        | proc1 lp       |             |          |
| dn C13           | fn1 2048       |             |          |
| dof -2515.2      | DISPLAY        |             |          |
| dm nny           | sp 1170.3      |             |          |
| dmm ccP          | wp 2819.6      |             |          |
| dm7 32258        | sp1 3188.2     |             |          |
| dpwr 36          | wp1 14398.0    |             |          |
| pwxlvl 52        | rfl 2186.0     |             |          |
| pwX 14.300       | rfp 2172.2     |             |          |
| HSQC             | rfl1 10755.8   |             |          |
| j1xh 140.0       | rfpl 9457.7    |             |          |
| nullflg y        | PLOT           |             |          |
| mult 2           | wc 150.0       |             |          |
|                  | sc 6.2         |             |          |
|                  | wc2 116.2      |             |          |
|                  | sc2 0          |             |          |
|                  | vs 100         |             |          |
|                  | th 6           |             |          |
|                  | ai cdc ph      |             |          |

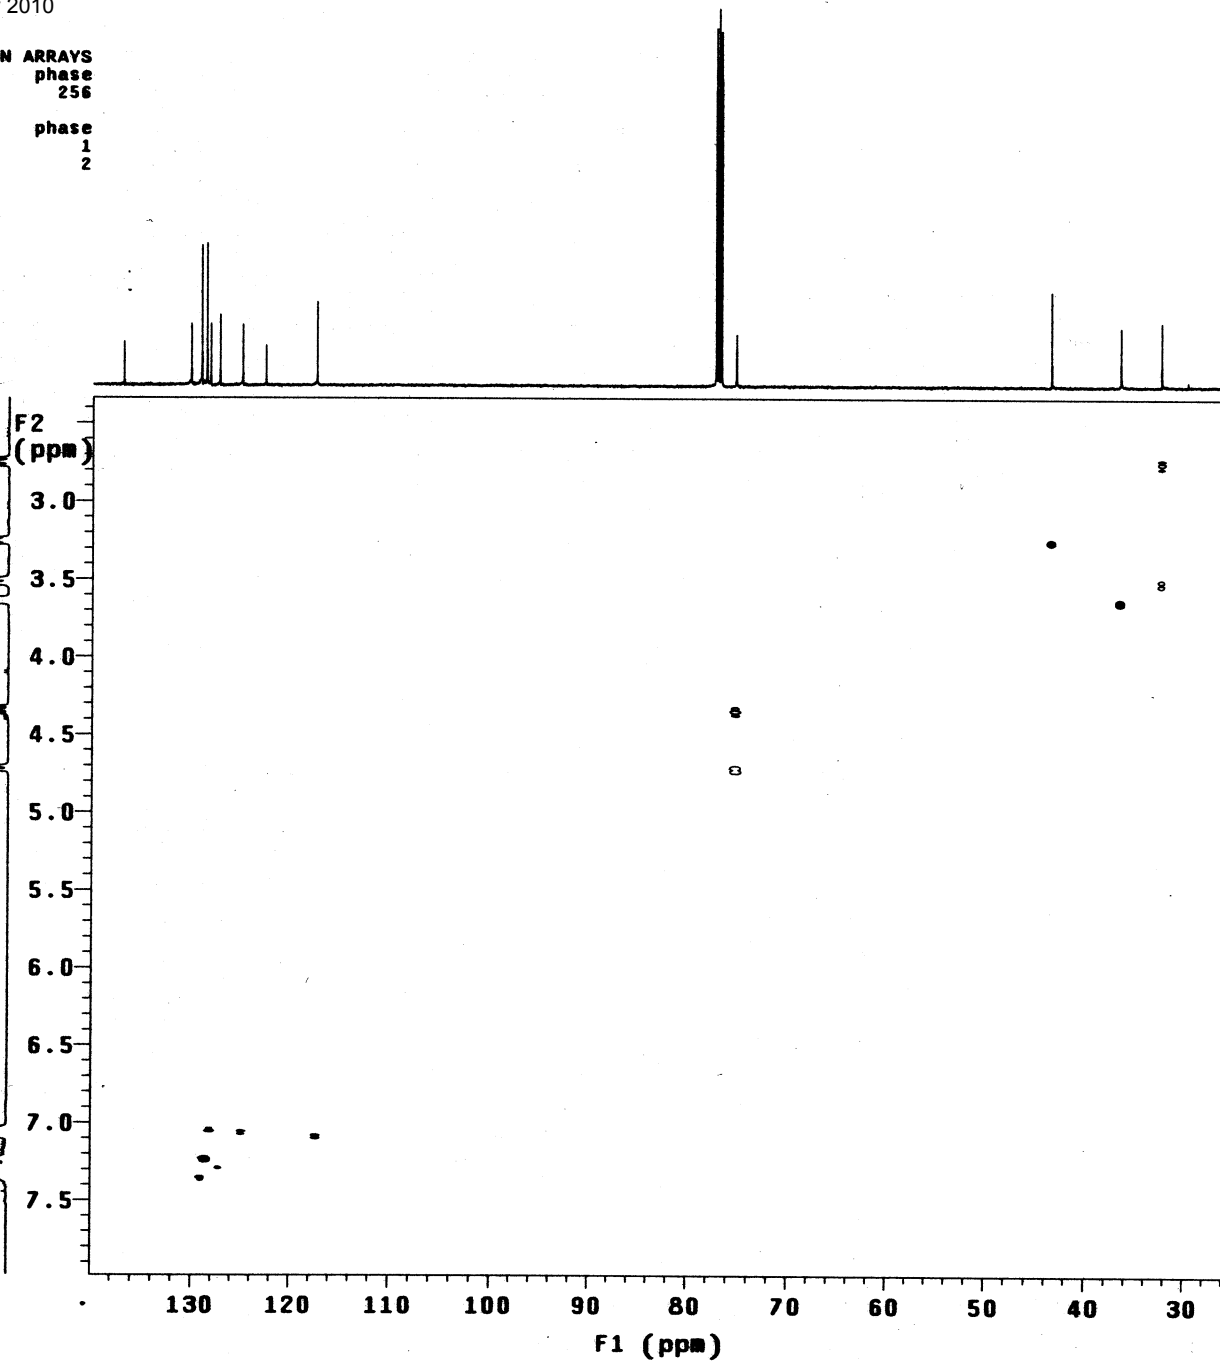



Fig S65. COSY of compound 3g

PKM-02-379# Supplementary Material (ESI) for Organic & Biomolecular Chemistry  
 # This journal is (c) The Royal Society of Chemistry 2010

```

exp6 gCOSY

SAMPLE          FLAGS
date May 22 2010 hs          nn
solvent cdc13    sspul       n
sample undefined hsglvl    1003
ACQUISITION
sw 4490.3 temp not used
at 0.228 gain 28
np 2048 spin
fb not used F2 PROCESSING
ss 16 sb -0.114
d1 1.000 sbs not used
nt 8 fn 2048
2D ACQUISITION F1 PROCESSING
sw1 4490.3 sb1 -0.029
n1 128 sb1 not used
TRANSMITTER proci lp
tn H1 fn1 2048
sfrq 499.829 DISPLAY
tof -250.8 sp 1200.8
tpwr 58 wp 2604.8
pv 11.100 ep1 1215.2
GRADIENTS wp1 2596.0
gzlv11 1003 rf1 2186.1
gt1 0.001000 rfp 2172.2
gstab 0.000500 rf1 2184.9
DECOUPLER rfpl 2172.2
dn C13 PLOT
dm nnn wc 155.0
sc 10.0
wc2 155.0
sc2 0
vs 100
th
ai cdc av
    
```

F2 (ppm)

3.0  
3.5  
4.0  
4.5  
5.0  
5.5  
6.0  
6.5  
7.0  
7.5

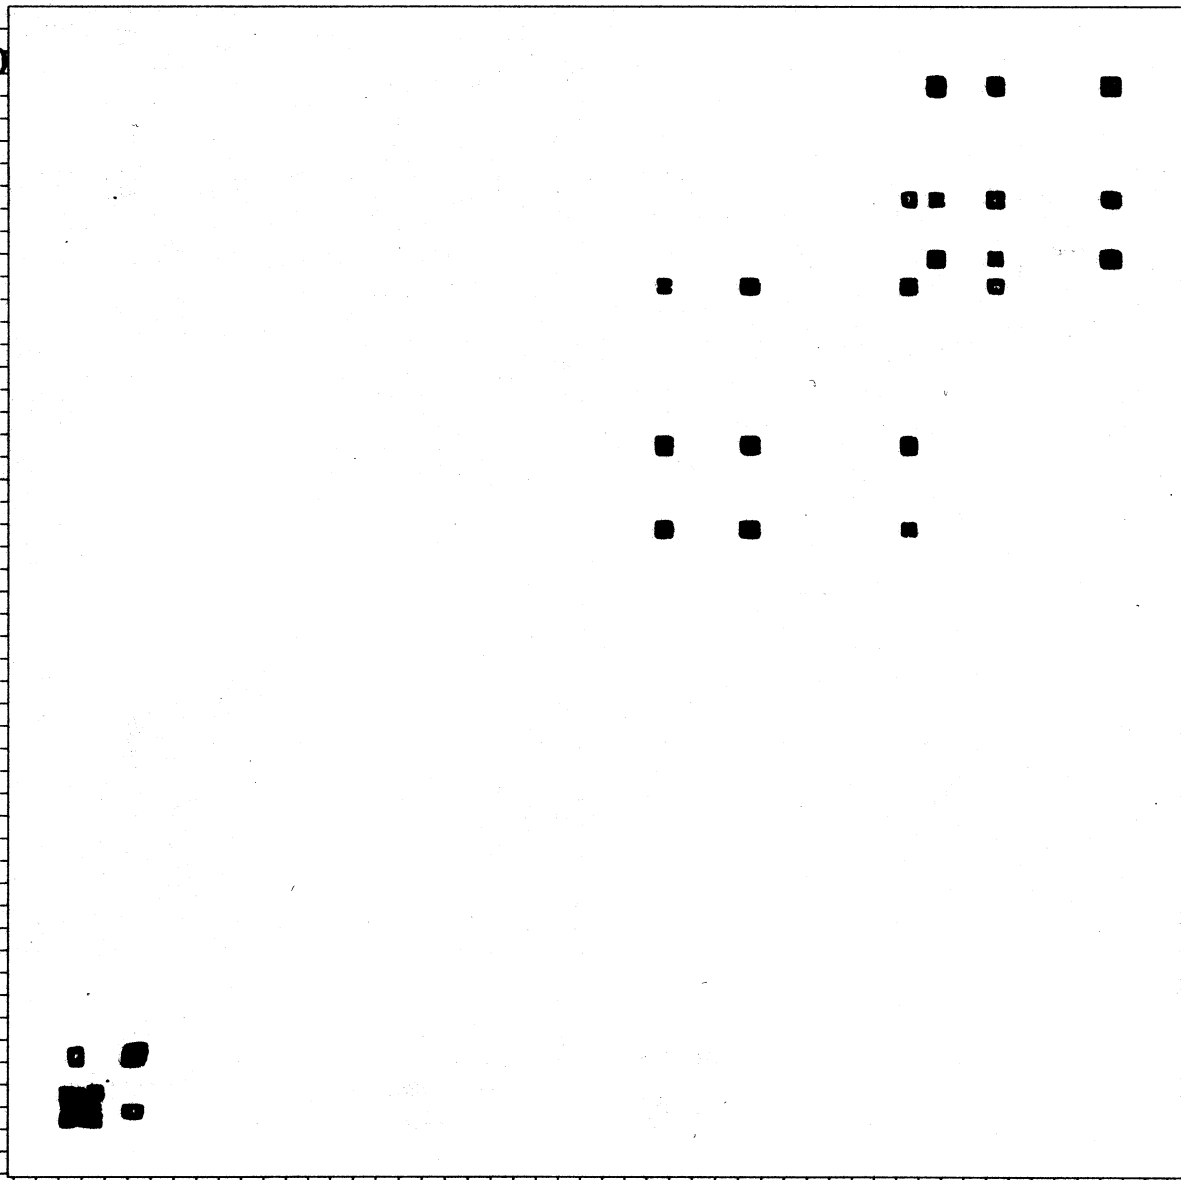

F1 (ppm)

Fig S66. NOESY of compound 3g

PMK-02-379 # Supplementary Material (ESI) for Organic & Biomolecular Chemistry  
 # This journal is (c) The Royal Society of Chemistry 2010

exp7 NOESY

|                |             |               |          |
|----------------|-------------|---------------|----------|
| SAMPLE         |             | FLAGS         |          |
| date           | May 22 2010 | hs            | n        |
| solvent        | cdcl3       | sspul         | y        |
| sample         | undefined   | PFGflg        | y        |
| ACQUISITION    |             | hsglvr        | 1003     |
| sw             | 4490.3      | SPECIAL       |          |
| at             | 0.228       | temp          | not used |
| np             | 2048        | gain          | 28       |
| fb             | not used    | spin          | 0        |
| ss             | 32          | F2 PROCESSING |          |
| d1             | 1.000       | gt            | 0.105    |
| nt             | 8           | gfs           | not used |
| 2D ACQUISITION |             | fn            | 2048     |
| sw1            | 4490.3      | F1 PROCESSING |          |
| ni             | 200         | gf1           | 0.041    |
| TRANSMITTER    |             | gfs1          | not used |
| tn             | H1          | procl         | lp       |
| sfrq           | 499.829     | fn1           | 2048     |
| tof            | -250.0      | DISPLAY       |          |
| tpwr           | 58          | sp            | 1217.6   |
| pw             | 11.100      | wp            | 2604.8   |
| NOESY          |             | sp1           | 1223.1   |
| mix            | 0.600       | wp1           | 2596.0   |
| PRESATURATION  |             | rfl           | 2186.9   |
| satmode        | nnnn        | rfp           | 2172.2   |
| satpwr         | 0           | rfl1          | 2185.7   |
| satdly         | 0           | rfp1          | 2172.2   |
| satfrq         | 0           | PLOT          |          |
| DECOUPLER      |             | wc            | 155.0    |
| dn             | C13         | sc            | 10.0     |
| dm             | nnn         | wc2           | 155.0    |
|                |             | sc2           | 0        |
|                |             | vs            | 100      |
|                |             | th            | 4        |
|                |             | a1            | ph       |

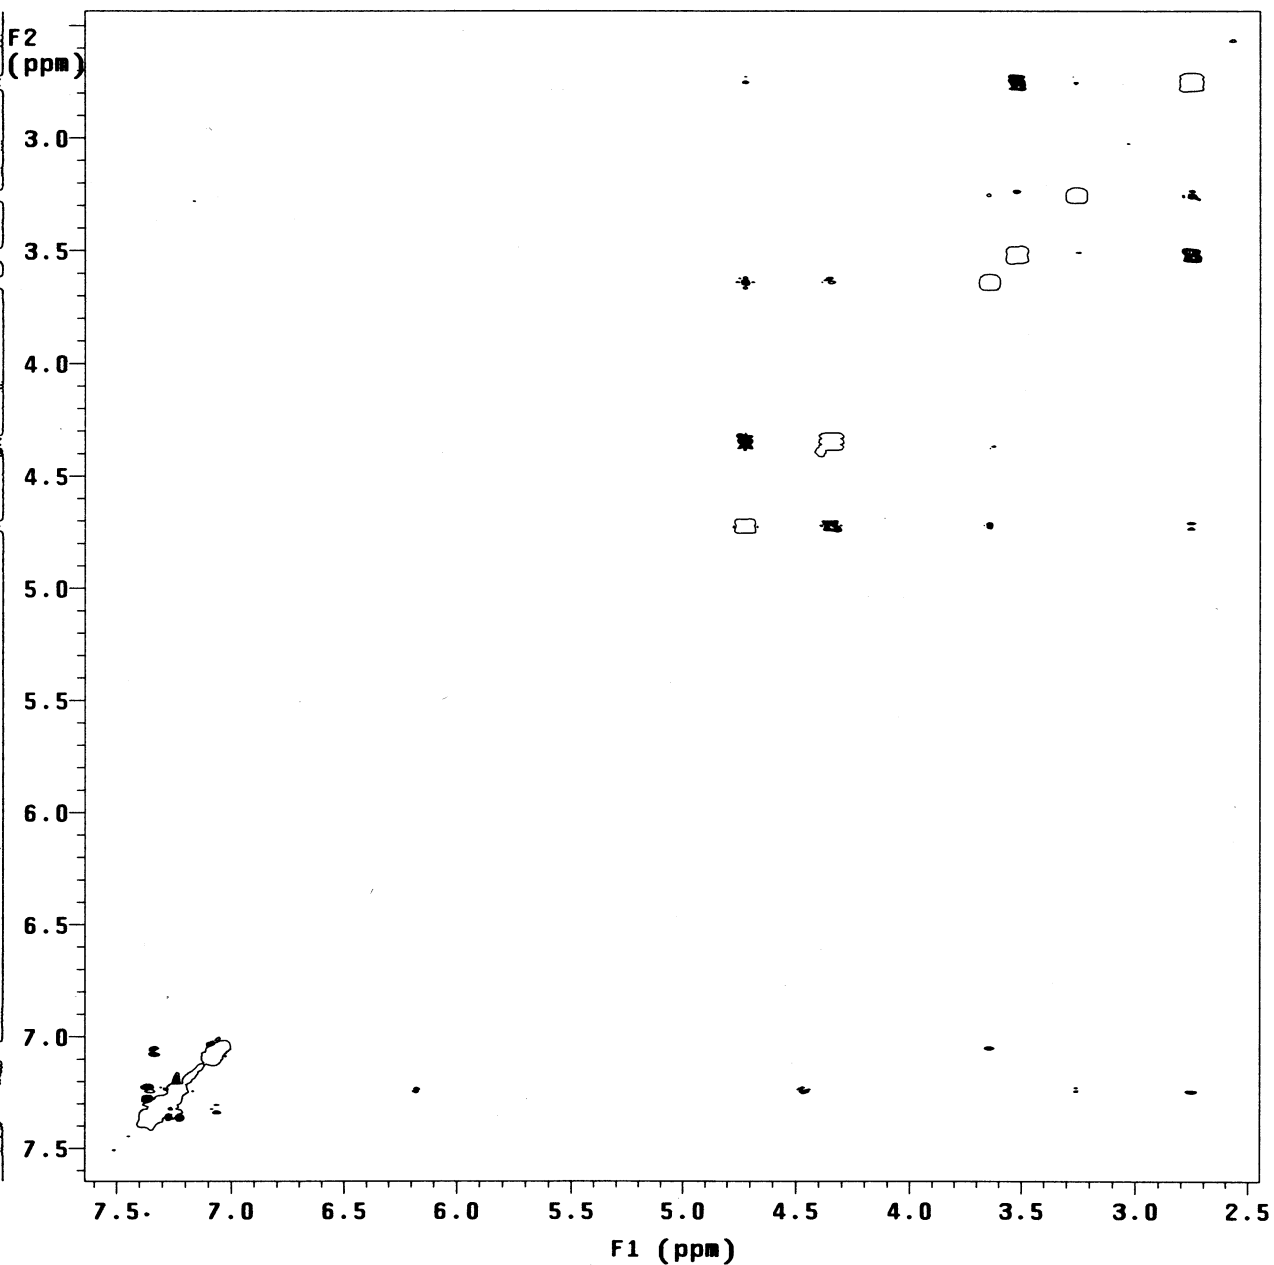

PMK-02-390

exp13 s2pu1

SAMPLE # 230110  
date Jul 23 2010  
solvent cdcl3  
file exp dpwr 30  
ACQUISITION dof 0  
sfrq 499.830 dm nnn  
tn H1 dmm c  
at 3.000 dmf 200  
np 48000 dseq  
sw 8000.0 dres 1.0  
fb not used homo n  
bs 4  
tpwr 58 wtfile  
pw 4.8 proc ft  
d1 1.000 fn not used  
tof 499.7 math f  
nt 4  
ct 4 werr react  
alock y wexp procplot  
gain not used wbs  
FLAGS wnt  
il n  
in n  
dp y  
hs nn  
DISPLAY  
sp -250.1  
wp 5498.0  
vs 100  
sc 0  
wc 210  
hzmm 26.18  
is 345.37  
rfl 4638.7  
rfp 3618.7  
th 2  
ins 100.000  
nm cdc ph

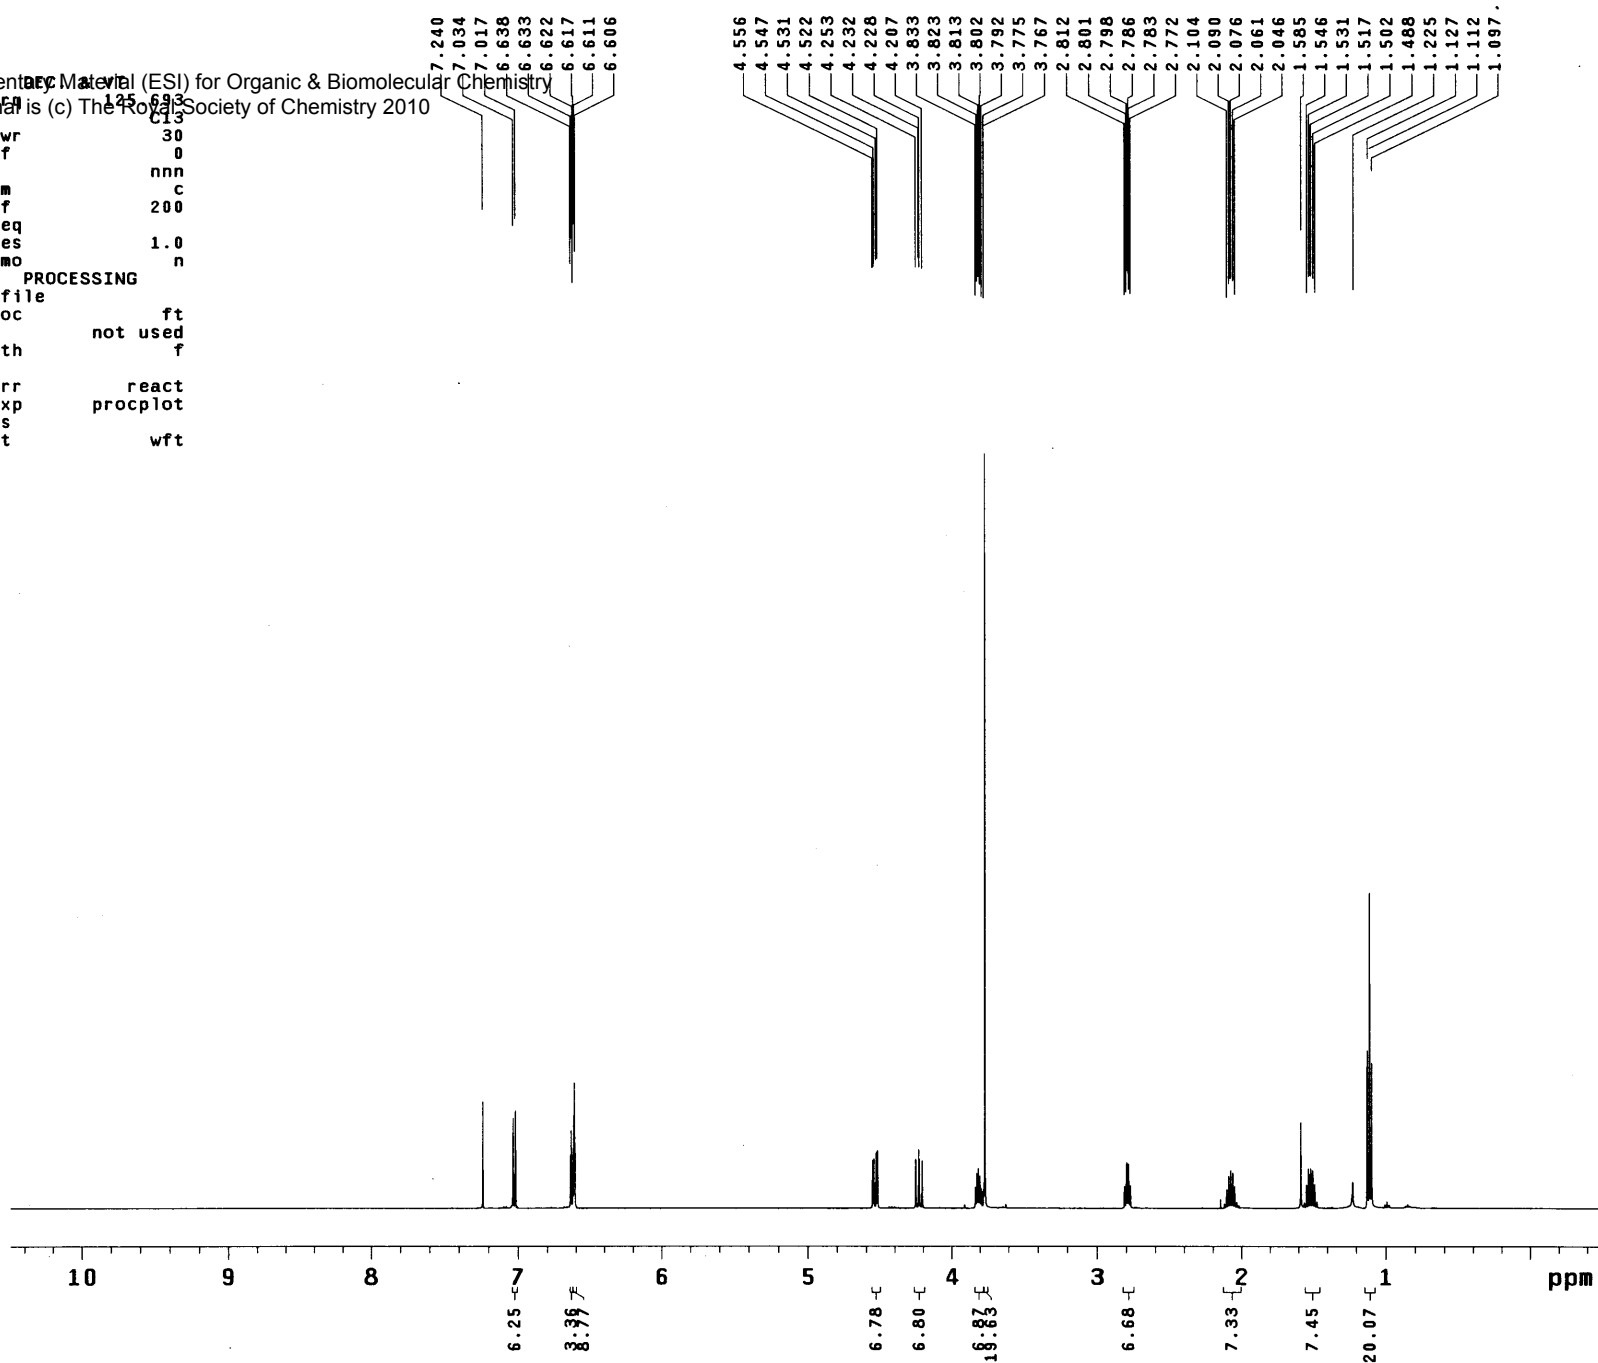

Fig S67. <sup>1</sup>H NMR (CDCl<sub>3</sub>, 500 MHz) of compound 3h

Fig S68. <sup>13</sup>C NMR (CDCl<sub>3</sub>, 125 MHz) of compound 3h

PMK-02-390 # Supplementary Material (ESI) for Organic & Biomolecular Chemistry

exp14 s2pu # This journal is (c) The Royal Society of Chemistry 2016

```

SAMPLE          DEC. & VT
date Jul 23 2010 dfrq 499.829
solvent cdc13 dn H1
file exp dpwr 39
ACQUISITION    dof 0
sfrq 125.696 dm yyy
tn C13 dmm w
at 1.000 dmf 11905
np 62894 dseq
sw 31446.5 dres 1.0
fb not used homo n
bs 16 PROCESSING
ss 2 lb 1.00
tpwr 54 wtfile
pw 4.0 proc ft
d1 1.000 fn not used
tof 2512.2 math f
nt 2048
ct 2048 werr react
alock y wexp procplot
gain not used wbs testsn
FLAGS          wnt
il n
in n
dp y
hs nn
DISPLAY
sp -1257.4
wp 28906.3
vs 100
sc 0
wc 210
hzmm 137.65
is 500.00
rf1 1269.9
rfp 0
th 7
ins 100.000
nm cdc ph
    
```

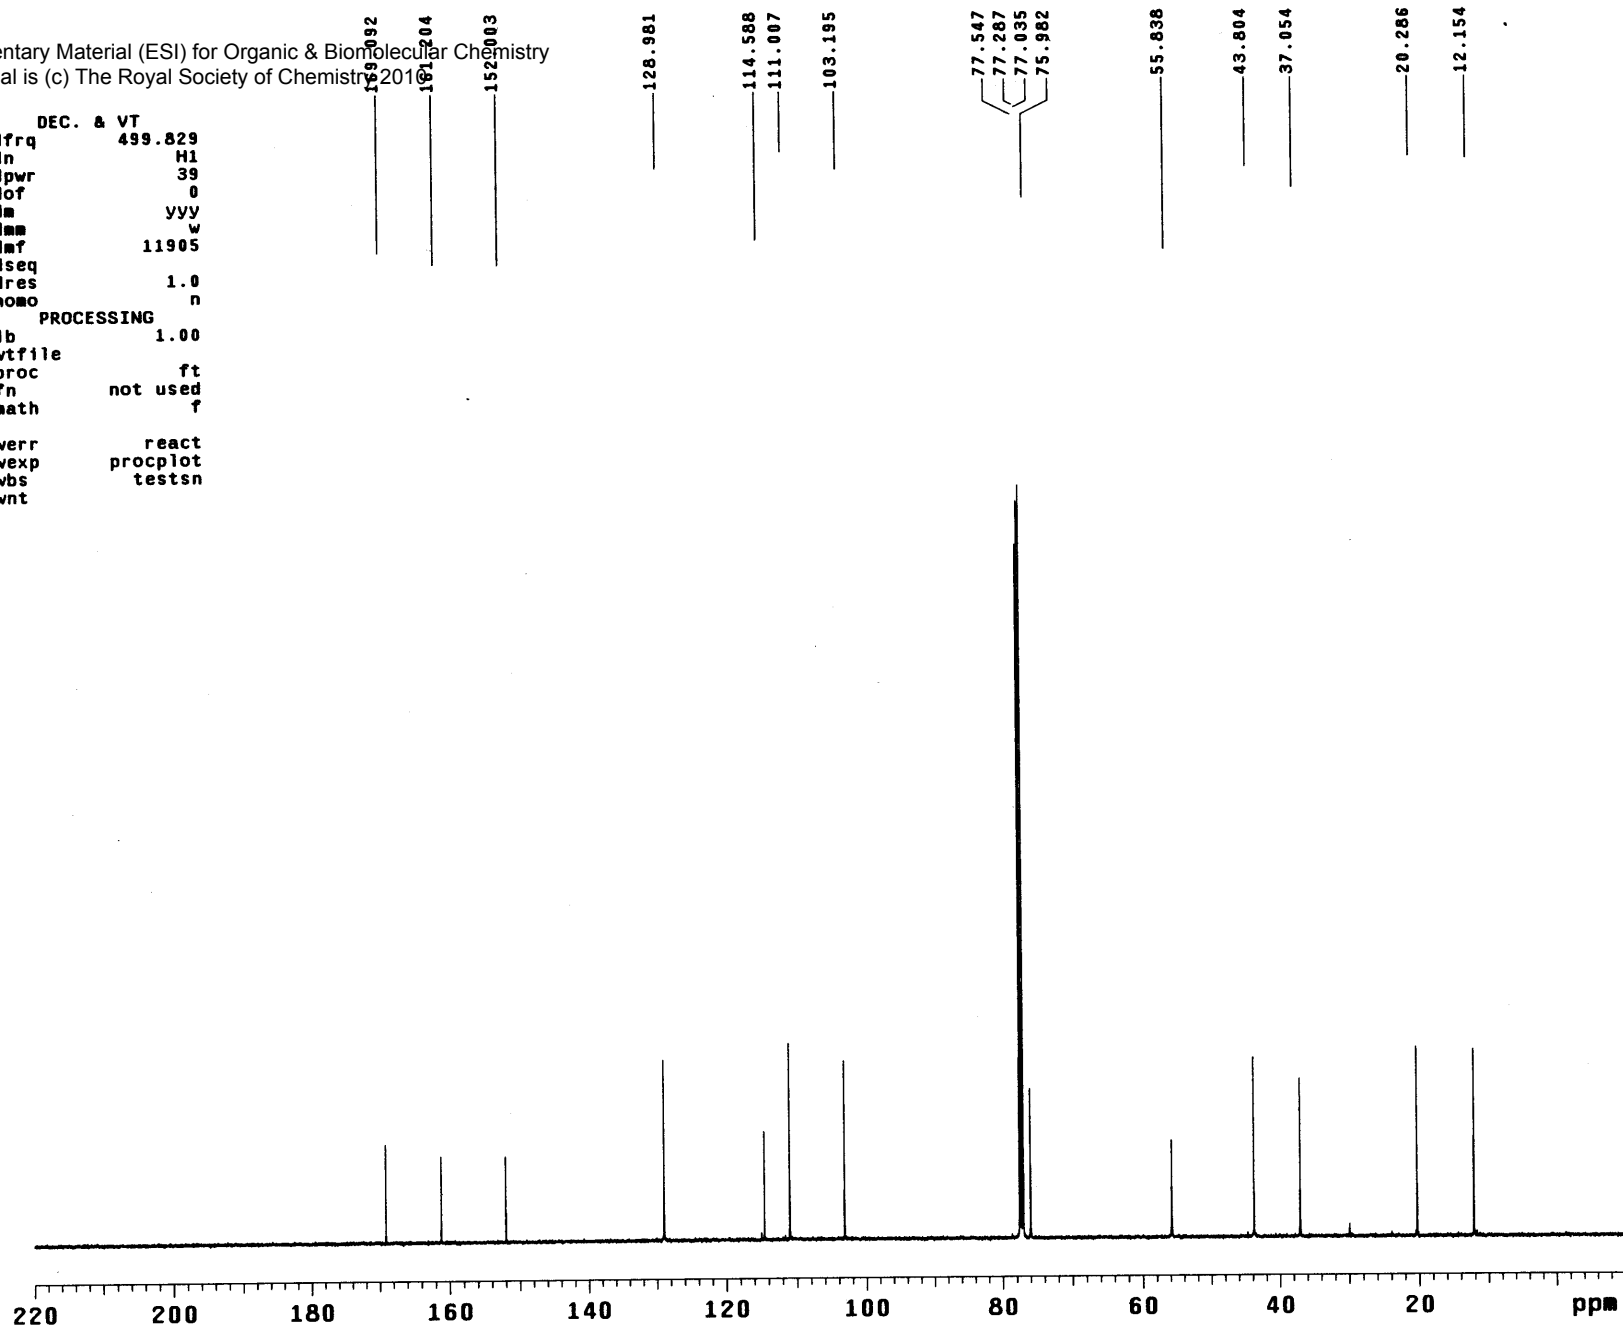

exp15 DEPT  
 # Supplementary Material (ESI) for Organic & Biomolecular Chemistry  
 This journal is (c) The Royal Society of Chemistry 2016

|             |             |          |          |                    |      |
|-------------|-------------|----------|----------|--------------------|------|
| date        | Jul 23 2016 | DEPT     | 140.0    | ACQUISITION ARRAYS | mult |
| solvent     | cdcl3       | mult     | arrayed  | arraydim           | 3    |
| sample      | undefined   | SPECIAL  |          |                    |      |
| ACQUISITION |             |          |          |                    |      |
| sw          | 31446.5     | temp     | not used | 1                  | mult |
| at          | 1.000       | gain     | 20       | 1                  | 0.5  |
| np          | 62894       | spin     | 0        | 2                  | 1    |
| bs          | 16          | lb       | 1.00     | 3                  | 1.5  |
| ss          | -4          | fn       | not used |                    |      |
| d1          | 1.000       | SPECTRUM |          |                    |      |
| nt          | 1024        | wp       | 28906.3  |                    |      |
| ct          | 1024        | sp       | -1257.0  |                    |      |
| TRANSMITTER |             |          |          |                    |      |
| tn          | C13         | rp       | 125.8    |                    |      |
| tof         | 2512.2      | lp       | 225.7    |                    |      |
| tpwr        | 54          | ai       | cdc ph   |                    |      |
| REFERENCE   |             |          |          |                    |      |
| pw          | 11.500      | rfl      | 1306.0   |                    |      |
| DECOUPLER   |             |          |          |                    |      |
| dn          | H1          | rfl      | 0        |                    |      |
| PLOT        |             |          |          |                    |      |
| dof         | 0           | wc       | 210      |                    |      |
| dpwr        | 39          | sc       | 0        |                    |      |
| dm          | nny         | vs       | 100      |                    |      |
| dmm         | ccw         | hzmm     | 137.65   |                    |      |
| dmt         | 11905       | th       | 68       |                    |      |
| pp1v1       | 51          |          |          |                    |      |
| pp          | 28.000      |          |          |                    |      |

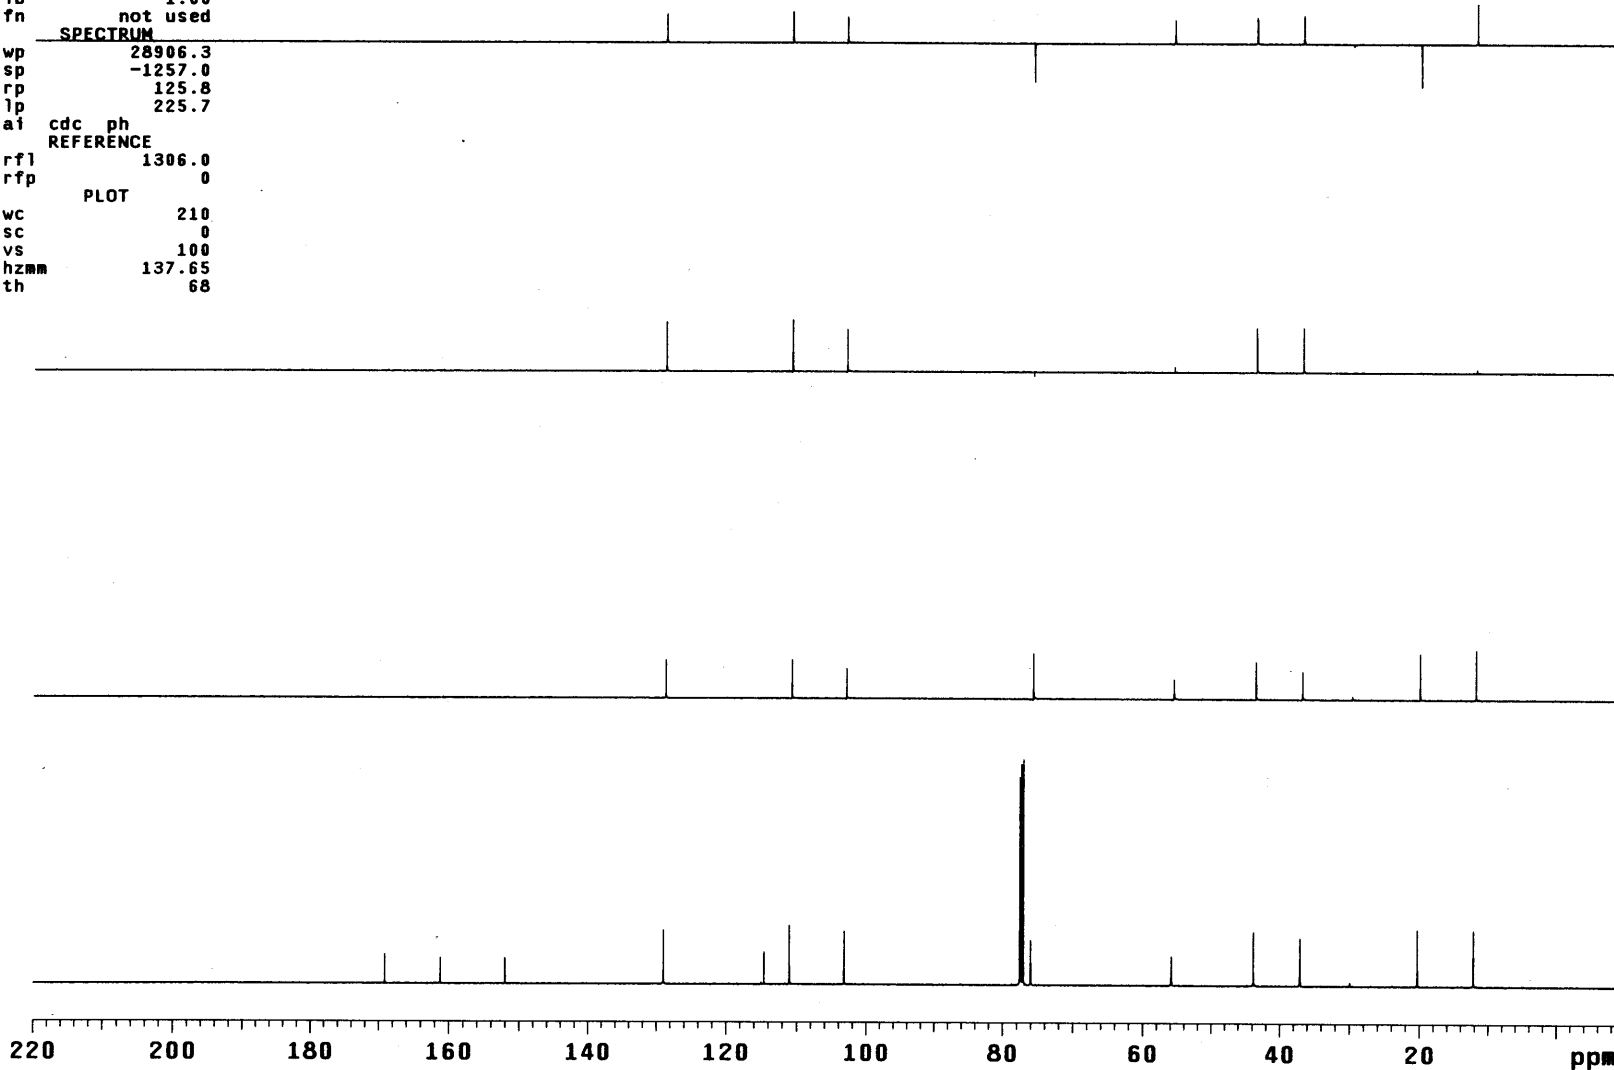

Fig S70. HSQC of compound 3h

PMK-02-390  
 # Supplementary Material (ESI) for Organic & Biomolecular Chemistry  
 exp18 ghsqc  
 # This journal is (c) The Royal Society of Chemistry 2010

| SAMPLE           | FLAGS         | ACQUISITION ARRAYS |
|------------------|---------------|--------------------|
| date Jul 23 2010 | hs            | n                  |
| solvent cdc13    | ssp1          | array              |
| sample undefined | PFGflg        | arraydim           |
| ACQUISITION      | hsglv1        | 1003               |
| sw 4001.6        | SPECIAL       | i                  |
| at 0.128         | temp          | 1                  |
| np 1024          | gain          | 2                  |
| fb not used      | spin          | 0                  |
| ss 32            | GRADIENTS     |                    |
| d1 1.000         | gzlv11        | 1003               |
| nt 8             | gt1           | 0.002000           |
| 2D ACQUISITION   | gzlv13        | 505                |
| sw1 21367.5      | gt3           | 0.001000           |
| ni 128           | gstab         | 0.000500           |
| phase arrayed    | F2 PROCESSING |                    |
| TRANSMITTER      | gf            | 0.059              |
| tn H1            | gfs           | not used           |
| sfrq 499.829     | fn            | 1024               |
| tof -499.9       | F1 PROCESSING |                    |
| tpwr 58          | gf1           | 0.006              |
| pw 11.100        | gfs1          | not used           |
| DECOUPLER        | proc1         | 1                  |
| dn C13           | fn1           | 2048               |
| dof -2515.2      | DISPLAY       |                    |
| dm nny           | sp            | 315.4              |
| dmm ccp          | wp            | 3384.2             |
| dmf 32258        | sp1           | 763.5              |
| dpwr 36          | wp1           | 16818.6            |
| pxlv1 52         | rfl           | 2135.0             |
| pxw 14.300       | rfp           | 2114.3             |
| HSQC             | rfl1          | 10810.1            |
| j1xh 140.0       | rfp1          | 9549.5             |
| nullflg y        | PLOT          |                    |
| mult 2           | wc            | 150.0              |
|                  | sc            | 6.2                |
|                  | wc2           | 116.2              |
|                  | sc2           | 0                  |
|                  | vs            | 100                |
|                  | th            | 4                  |
|                  | al cdc ph     |                    |

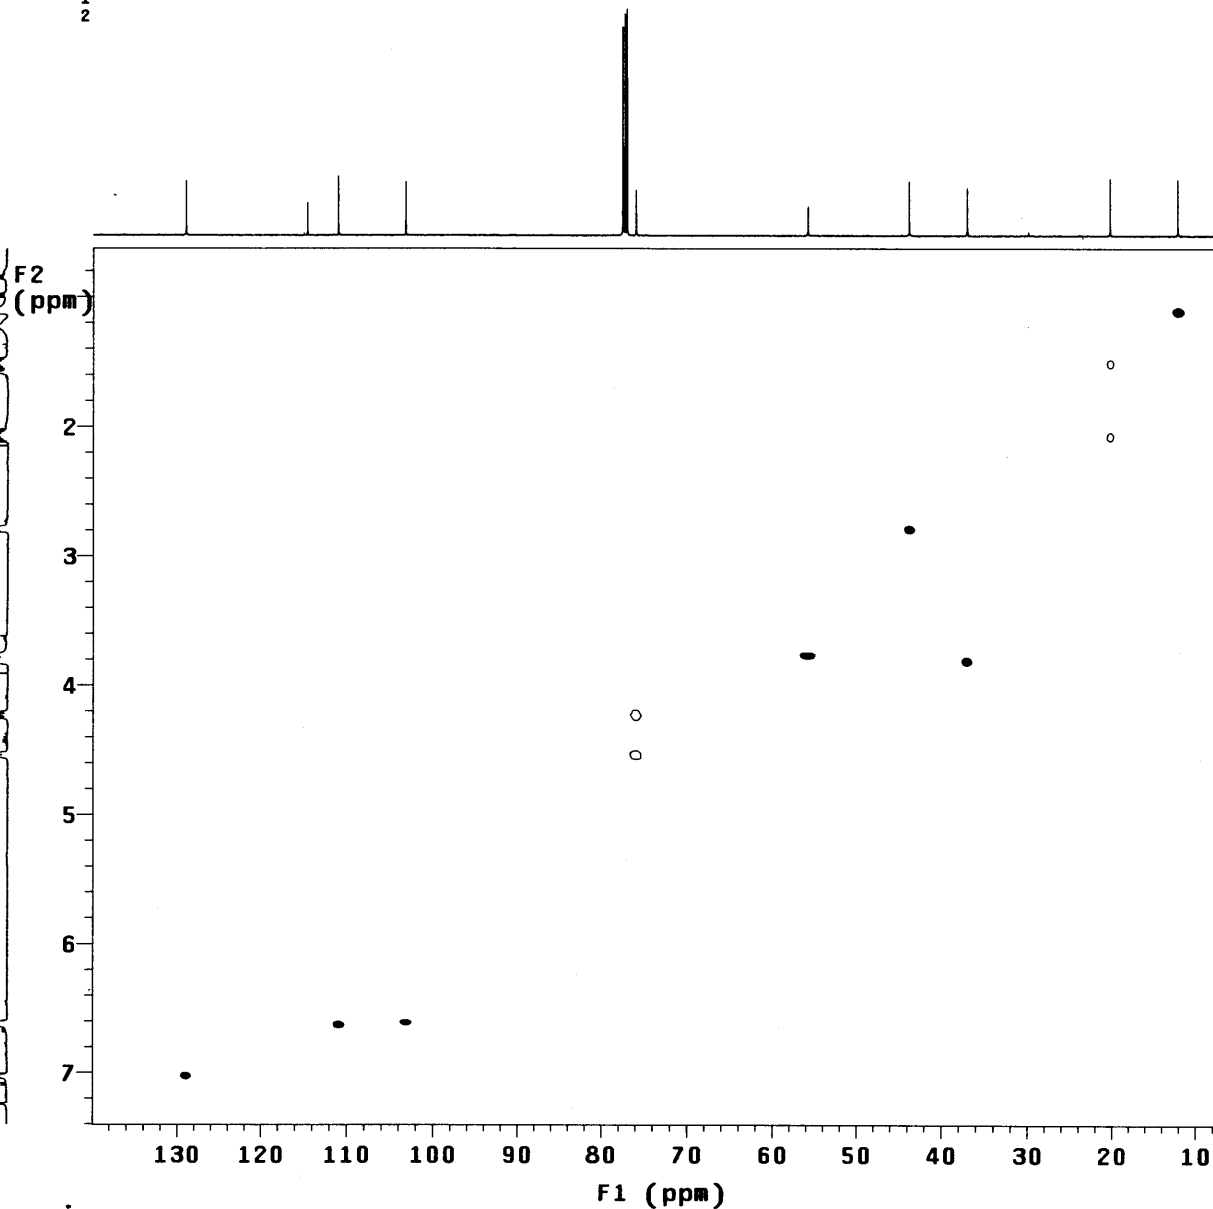

# Fig S71. COSY of compound 3h

PMK-02-390# Supplementary Material (ESI) for Organic & Biomolecular Chemistry  
 exp16 gCOSY This journal is (c) The Royal Society of Chemistry 2010

| SAMPLE         |             | FLAGS         |          |
|----------------|-------------|---------------|----------|
| date           | Jul 23 2010 | hs            | nn       |
| solvent        | cdc13       | sspul         | n        |
| sample         | undefined   | hsglv1        | 1003     |
| ACQUISITION    |             | SPECIAL       |          |
| sw             | 4001.6      | temp          | not used |
| at             | 0.128       | gain          | 24       |
| np             | 1024        | spin          | 0        |
| fb             | not used    | F2 PROCESSING |          |
| ss             | 16          | sb            | -0.064   |
| d1             | 1.000       | sbs           | not used |
| nt             | 8           | fn            | 1024     |
| 2D ACQUISITION |             | F1 PROCESSING |          |
| sw1            | 4001.6      | sb1           | -0.032   |
| n1             | 128         | sbs1          | not used |
| TRANSMITTER    |             | PROC1         |          |
| tn             | H1          | fni           | 1024     |
| sfrq           | 499.829     | DISPLAY       |          |
| tof            | -499.9      | sp            | 301.7    |
| tpwr           | 58          | wp            | 3399.8   |
| pw             | 11.100      | sp1           | 293.8    |
| GRADIENTS      |             | wp1           | 3399.8   |
| gzlv1          | 1003        | rfl           | 2133.0   |
| gt1            | 0.001000    | rfl1          | 2114.3   |
| gstab          | 0.000500    | rfl1          | 2133.0   |
| DECOUPLER      |             | rfl1          | 2114.3   |
| dn             | C13         | PLOT          |          |
| dm             | nnn         | wc            | 155.0    |
|                |             | sc            | 10.0     |
|                |             | wc2           | 155.0    |
|                |             | sc2           | 0        |
|                |             | vs            | 100      |
|                |             | th            | 7        |
|                |             | ai            | cdc av   |

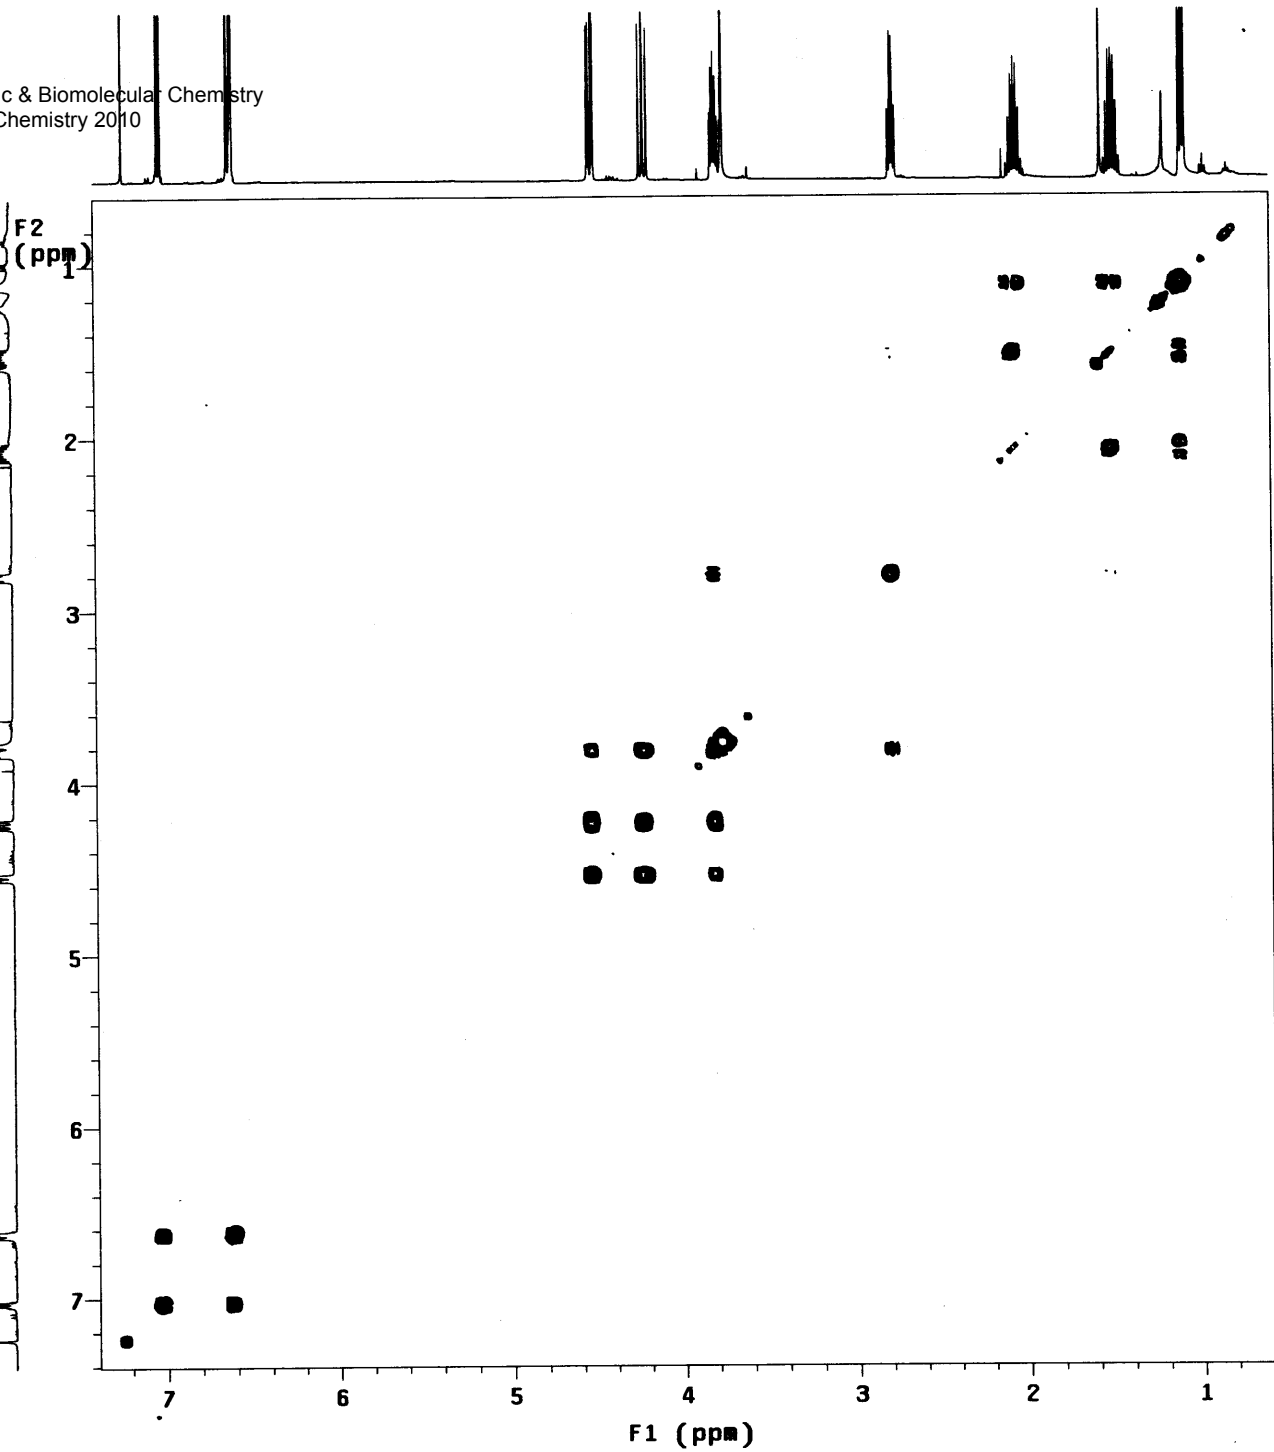

# Fig S72. NOESY of compound 3h

PMK-02-390

exp17 NOESY Supplementary Material (ESI) for Organic & Biomolecular Chemistry

# This journal is (c) The Royal Society of Chemistry 2010

| SAMPLE         | DATE        | TIME  | HS      | FLAGS      | N    |
|----------------|-------------|-------|---------|------------|------|
| solvent        | Jul 23 2010 | 0.128 | cdc13   | sspul      | y    |
| sample         | undefined   | 1024  | PFGflg  | hsglvt     | y    |
| ACQUISITION    |             |       |         |            | 1003 |
| sw             | 4001.6      |       | SPECIAL | not used   |      |
| at             | 0.128       |       | temp    | gain       | 24   |
| np             | 1024        |       | gain    | spin       | 0    |
| fb             | not used    |       | F2      | PROCESSING |      |
| ss             | 32          |       | gf      | 0.059      |      |
| d1             | 1.000       |       | gfs     | not used   |      |
| nt             | 8           |       | fn      | 1024       |      |
| 2D ACQUISITION |             |       | F1      | PROCESSING |      |
| sw1            | 4001.6      |       | gfi     | 0.046      |      |
| ni             | 200         |       | gfs1    | not used   |      |
| TRANSMITTER    |             |       | procl   | 1024       |      |
| tn             | H1          |       | fn1     | 1024       |      |
| sfrq           | 499.829     |       | DISPLAY |            |      |
| tof            | -499.9      |       | sp      | 348.4      |      |
| tpwr           | 58          |       | wp      | 3360.7     |      |
| pw             | 11.100      |       | sp1     | 340.3      |      |
| NOESY          |             |       | wp1     | 3368.5     |      |
| mix            | 0.600       |       | rfl     | 2141.0     |      |
| PRESATURATION  |             |       | rfp     | 2114.3     |      |
| satmode        | nnnn        |       | rfl1    | 2133.5     |      |
| satpwr         | 0           |       | rfp1    | 2114.3     |      |
| satdly         | 0           |       | PLOT    |            |      |
| satfrq         | 0           |       | wc      | 155.0      |      |
| DECOUPLER      |             |       | sc      | 10.0       |      |
| dn             | C13         |       | wc2     | 155.0      |      |
| dm             | nnn         |       | sc2     | 0          |      |
|                |             |       | vs      | 100        |      |
|                |             |       | th      |            |      |
|                |             |       | ai      |            |      |
|                |             |       | ph      |            |      |

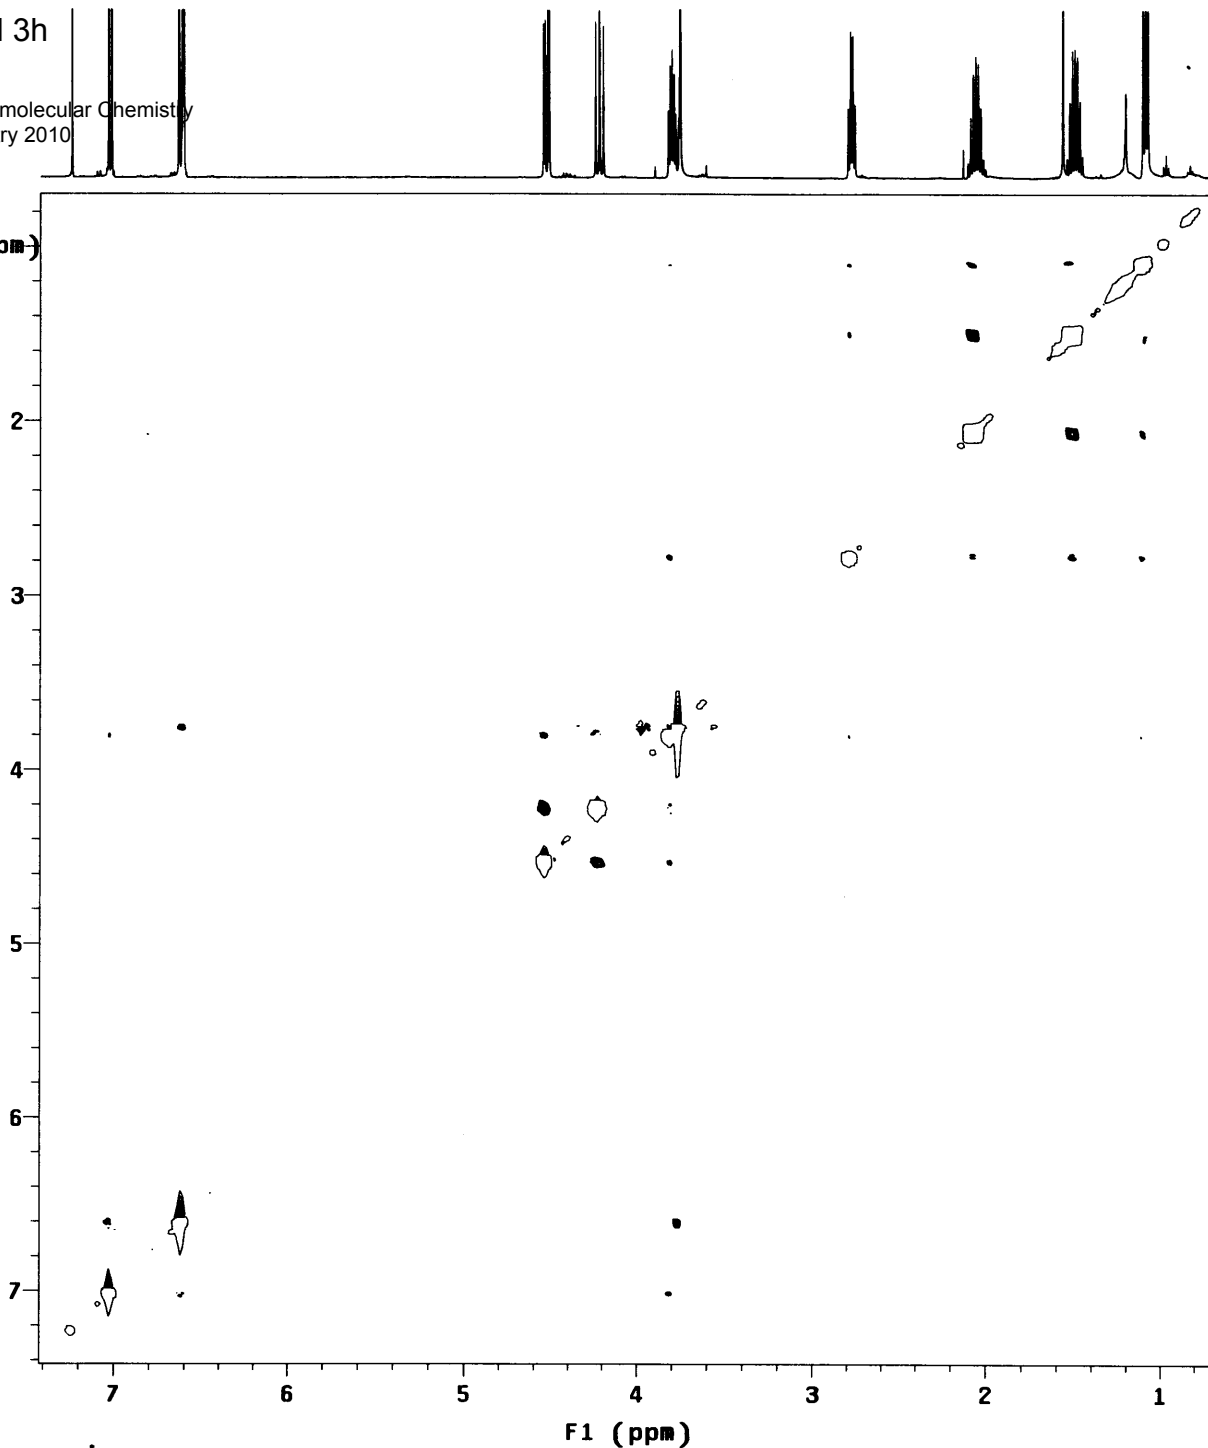



Fig S73. <sup>1</sup>H NMR (CDCl<sub>3</sub>, 500 MHz) of compound cis-3i

PMK-02-377

# Supplementary Material (ESI) for Organic & Biomolecular Chemistry  
 exp13 s2 This journal is (c) The Royal Society of Chemistry 2010

```

SAMPLE          DEC. & VT
date May 20 2010 dfrq 125.693
solvent cdc13 dn C13
file exp dpwr 30
ACQUISITION    dof 0
sfrq 499.830 dm nnn
tn H1 dnm c
at 3.000 dmf 200
np 48000 dseq
sw 8000.0 dres 1.0
fb not used homo n
bs 4
tpwr 58 wtfile
pw 4.8 proc ft
di 1.000 fn not used
tof 499.7 math f
nt 4
ct 4 werr react
alock y wexp procplot
gain not used wbs
FLAGS          wnt wft
il n
in n
dp y
hs nn
DISPLAY
sp -250.1
wp 5498.0
vs 100
sc 0
wc 210
hzmm 26.18
is 294.36
rf1 4637.9
rfp 3618.7
th 1
ins 100.000
nm cdc ph
    
```

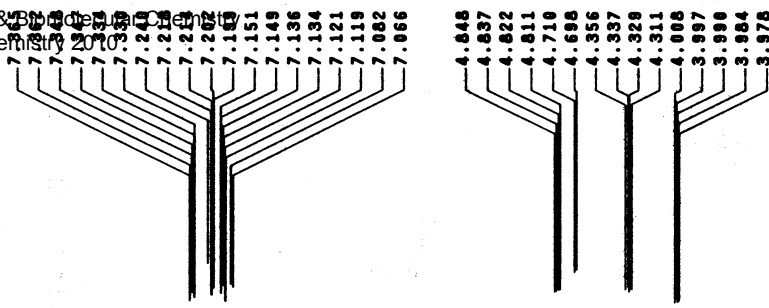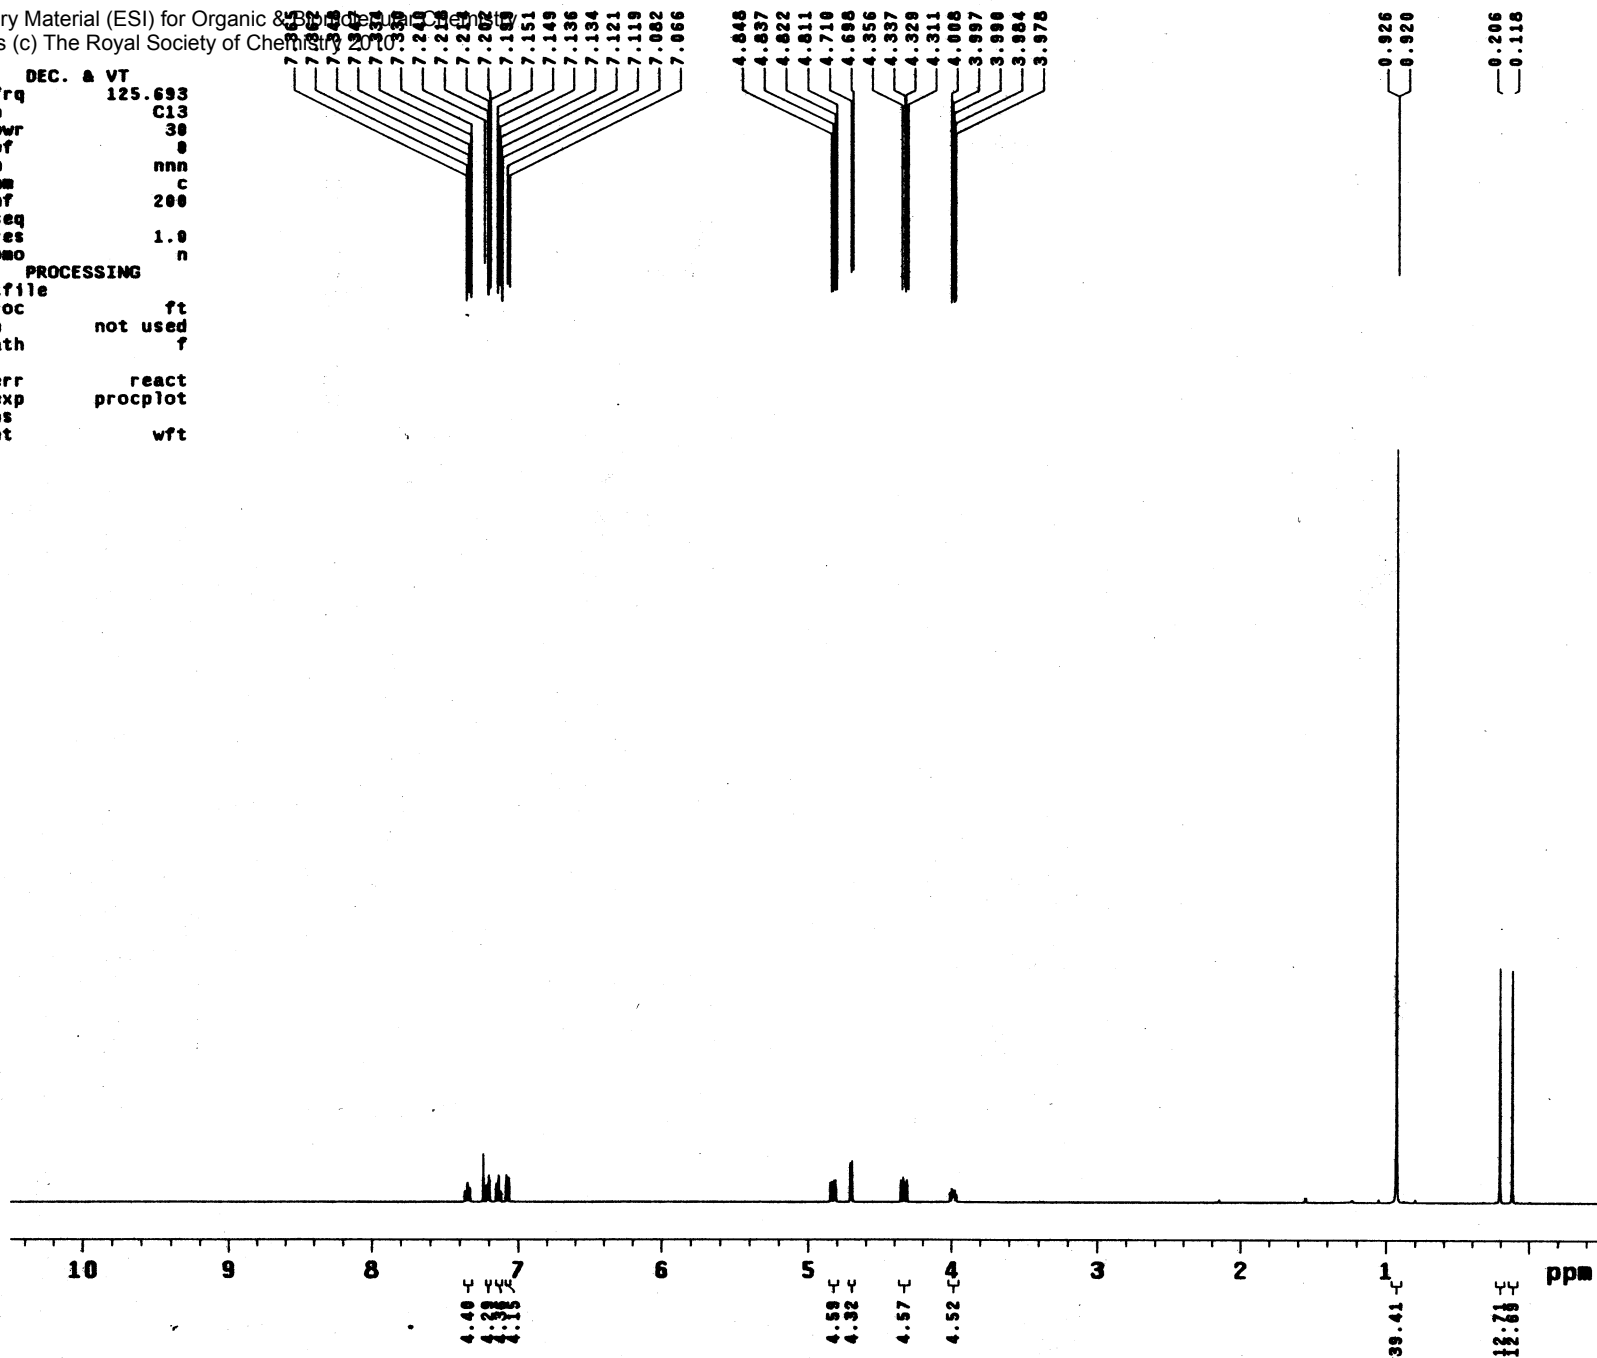

4.40  
4.39  
4.38

4.58  
4.32

99.41

12.78

Fig S74. <sup>13</sup>C NMR (CDCl<sub>3</sub>, 125 MHz) of compound cis-3i

```

# Supplementary Material (ESI) for Organic & Biomolecular Chemistry
# This journal is (c) The Royal Society of Chemistry 2010
PMK-02-377
exp14 s2pu1
SAMPLE
date May 20 2010 dfrq 499.829
solvent cdc13 dn H1
file exp dpwr 39
ACQUISITION
sfrq 125.696 dm vvy
tn C13 dam w
at 1.000 daf 11905
np 62894 dseq
sw 31446.5 dres 1.0
fb not used homo n
bs 16
ss 2 lb PROCESSING
tpwr 54 wtfile
pw 4.0 proc ft
d1 1.000 fn not used
tof 2512.2 math f
nt 2048
ct 2048 werr react
alock y wexp procplot
gain not used wbs testsn
FLAGS
il n
in n
dp y
hs n
DISPLAY
sp -1257.0
wp 28906.3
vs 100
sc 0
wc 210
hzmm 137.65
is 500.00
rf1 10982.5
rfp 9677.5
th 4
ins 100.000
nm cdc ph
  
```

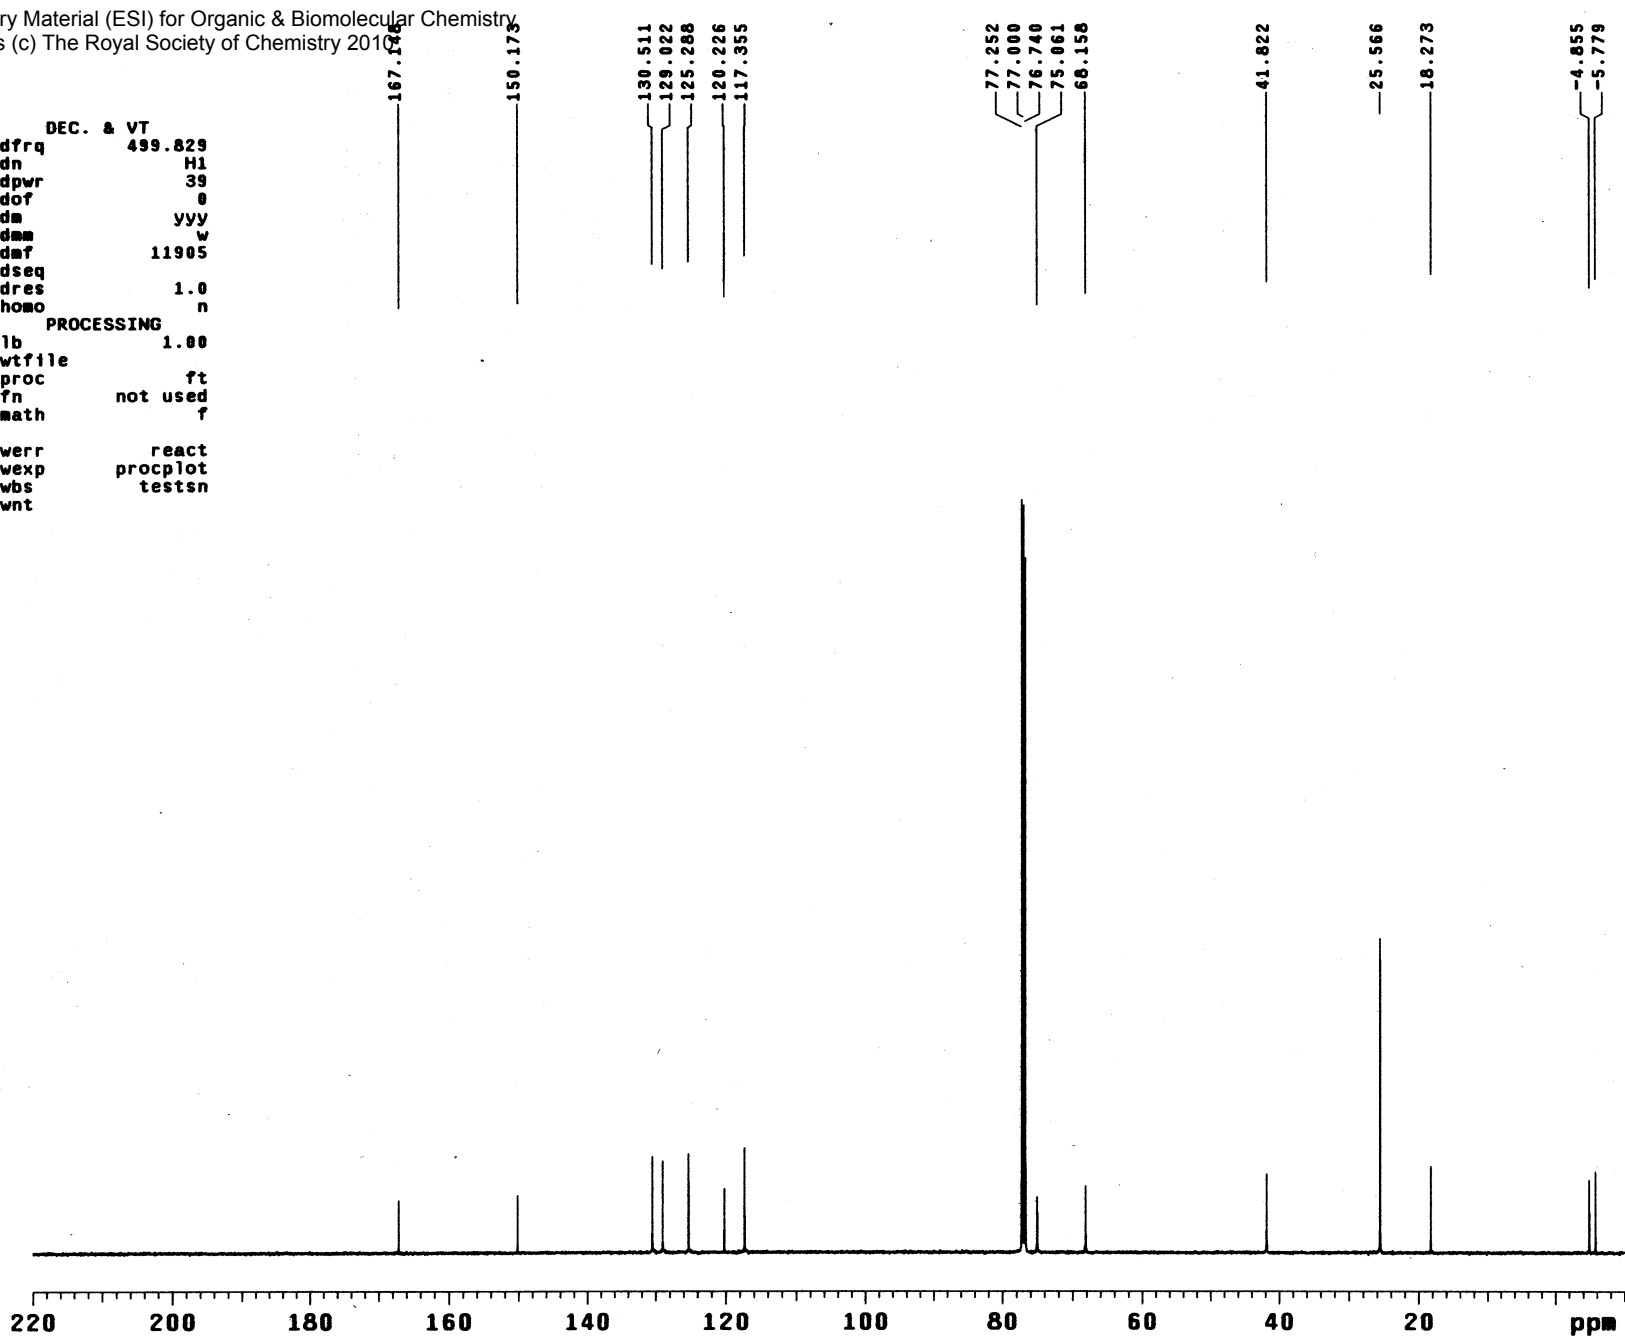

Fig S75. DEPT of compound cis-3i

# Supplementary Material (ESI) for Organic & Biomolecular Chemistry  
 # This journal is (c) The Royal Society of Chemistry 2010

exp15 DEPT

|             |             |            |          |          |      |
|-------------|-------------|------------|----------|----------|------|
| date        | May 20 2010 | j1xh       | 140.0    | array    | mult |
| solvent     | cdc13       | mult       | arrayed  | arraydim | 3    |
| sample      | undefined   | SPECIAL    |          |          |      |
| ACQUISITION |             | temp       | not used | 1        | mult |
| sw          | 31446.5     | gain       | 28       | 1        | 0.5  |
| at          | 1.000       | spin       | 0        | 2        | 1    |
| np          | 62894       | PROCESSING |          | 3        | 1.5  |
| bs          | 16          | lb         | 1.00     |          |      |
| ss          | -4          | fn         | not used |          |      |
| dl          | 1.000       | SPECTRUM   |          |          |      |
| nt          | 2048        | wp         | 28906.3  |          |      |
| ct          | 2048        | sp         | -1257.0  |          |      |
| TRANSMITTER |             | rp         | 138.2    |          |      |
| tn          | C13         | lp         | 191.8    |          |      |
| tof         | 2512.2      | ai         | cdc ph   |          |      |
| tpwr        | 54          | REFERENCE  |          |          |      |
| pw          | 11.500      | rfl        | 1304.0   |          |      |
| DECOUPLER   |             | rfp        | 0        |          |      |
| dn          | H1          | PLOT       |          |          |      |
| dof         | 0           | wc         | 210      |          |      |
| dpwr        | 39          | sc         | 0        |          |      |
| dm          | nny         | vs         | 100      |          |      |
| dmm         | ccw         | hzmm       | 137.65   |          |      |
| daf         | 11985       | th         | 68       |          |      |
| pp1v1       | 51          |            |          |          |      |
| pp          | 28.000      |            |          |          |      |

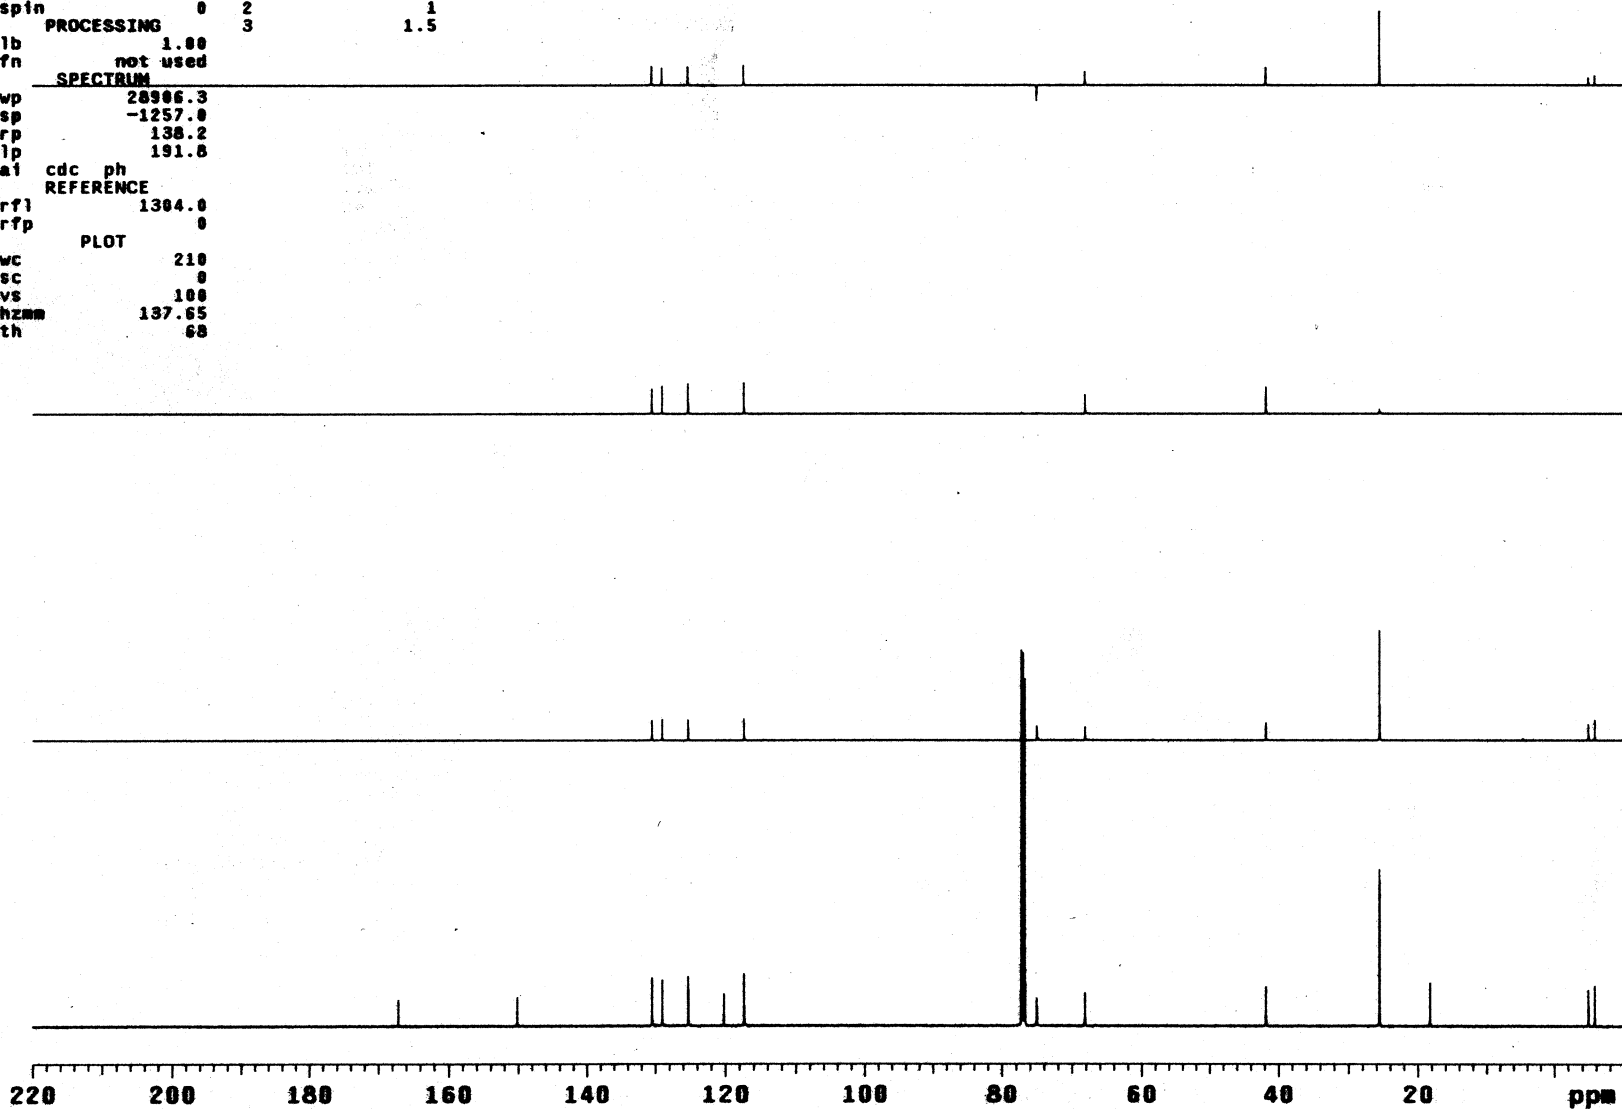

exp18 gHSQC

Supplementary Material (ESI) for Organic & Biomolecular Chemistry  
 This journal is © The Royal Society of Chemistry 2010

```

date   May 20 2010 15:05:00
solvent  CDCl3
sample  undefined
ACQUISITION
sw      5006.3
at      0.205
np      2048
fb      not used
ss      32
d1      1.000
nt      8
2D ACQUISITION
sw1     21367.5
ni      128
phase   arrayed
TRANSMITTER
tn      H1
sfrq    499.829
tof     -499.9
tpwr    58
pw      11.100
DECOUPLER
dn      C13
dof     -2515.2
dm      nny
dmm     ccp
dmf     32258
dpwr    36
pwx1v1  52
pwx     14.300
HSQC
j1xh    140.0
nullf1g y
mult    2
PFGf1g 1003
hsg1v1 1
SPECIAL 1
temp    not used
gain    20
spin    0
GRADIENTS
gz1v11 1003
gt1     0.002000
gz1v13 505
gt3     0.001000
gstab   0.000500
F2 PROCESSING
gf      0.094
gfs     not used
fn      2048
F1 PROCESSING
gf1     0.006
gfs1    not used
procl   -1p
fn1     2048
DISPLAY
sp      -195.5
wp      4111.6
sp1     -1231.1
wp1     18821.8
rf1     2515.9
rfp     1992.8
rf11    6550.0
rfp1    5256.3
PLOT
wc      150.0
sc      6.2
wc2     116.2
sc2     0
vs      1814
th      3
ai      cdc ph
    
```

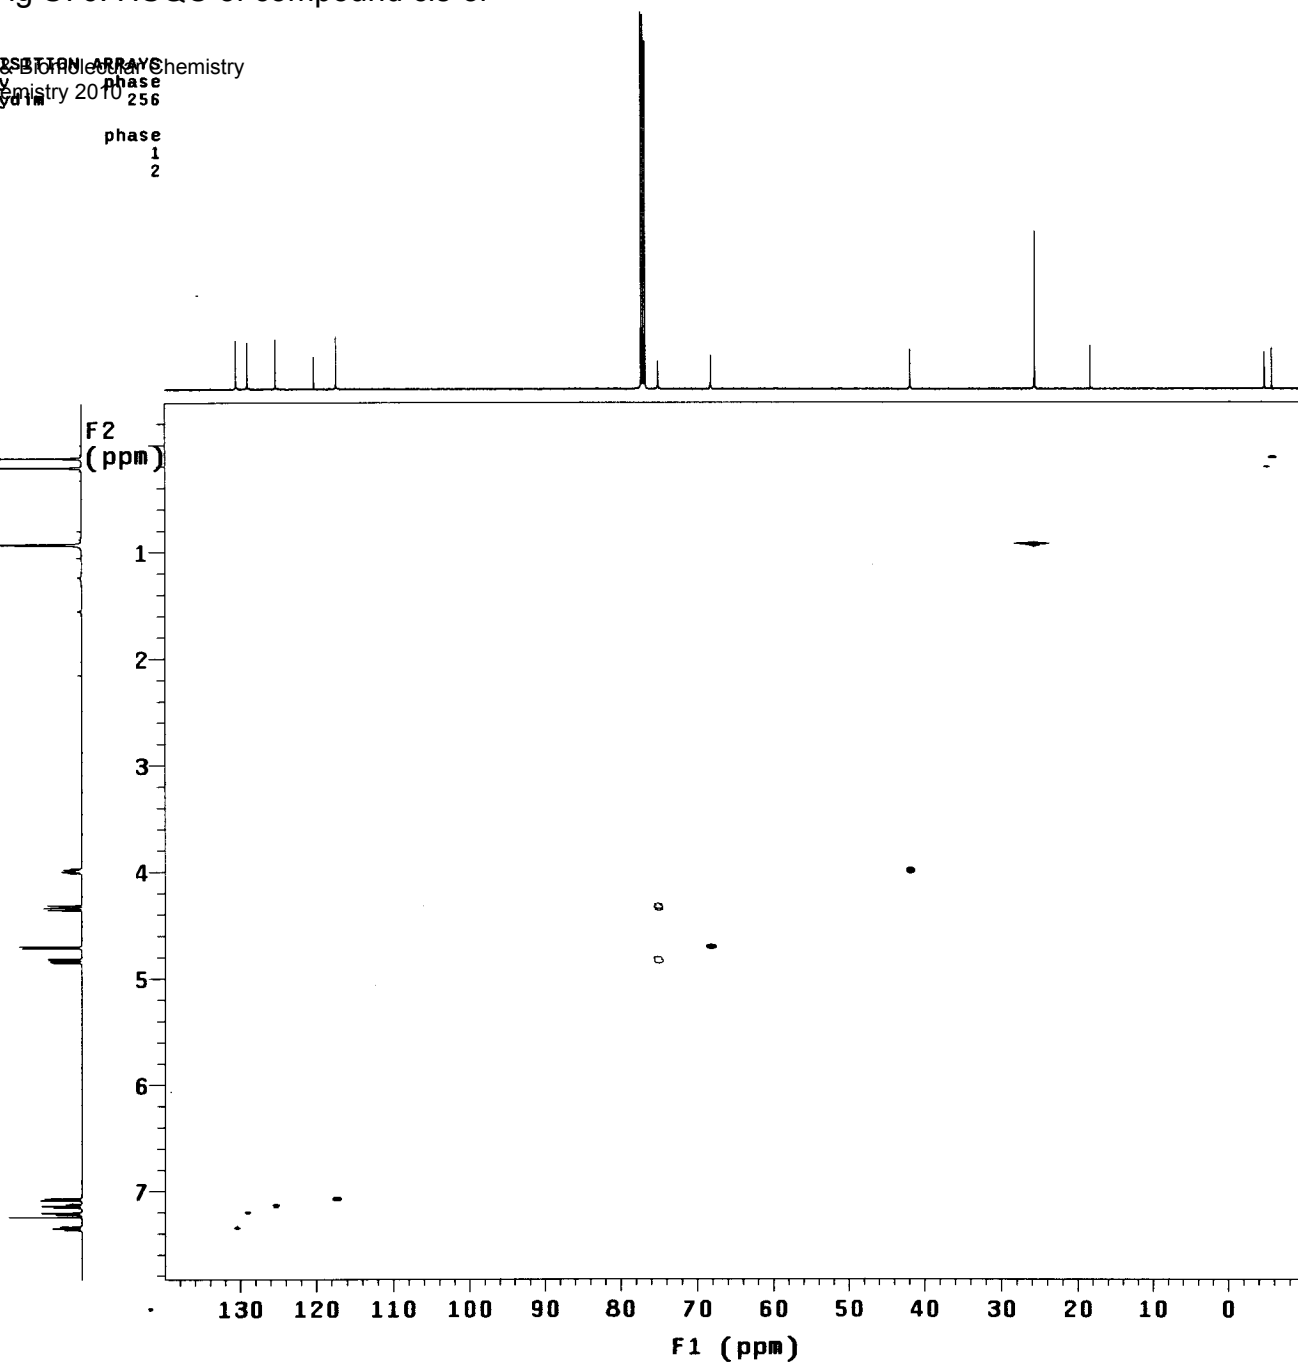

Fig S77. COSY of compound cis-3i

PMK-02377  
 # Supplementary Material (ESI) for Organic & Biomolecular Chemistry  
 # This journal is (c) The Royal Society of Chemistry 2010  
 exp16 gCOSY

|                |             |               |            |
|----------------|-------------|---------------|------------|
| date           | May 20 2010 | hs            | nn         |
| solvent        | cdc13       | sspul         | n          |
| sample         | undefined   | hsglv1        | 1003       |
| ACQUISITION    |             | SPECIAL       |            |
| sw             | 5006.3      | temp          | not used   |
| at             | 0.205       | gain          | 20         |
| np             | 2048        | spin          | 0          |
| fb             | not used    | F2            | PROCESSING |
| ss             | 16          | sb            | -0.102     |
| d1             | 1.000       | sbs           | not used   |
| nt             | 16          | fn            | 2048       |
| 2D ACQUISITION |             | F1 PROCESSING |            |
| sw1            | 5006.3      | sb1           | -0.026     |
| n1             | 128         | sbs1          | not used   |
| TRANSMITTER    |             | proc1         |            |
| tn             | H1          | fn1           | 2048       |
| sfrq           | 499.829     | DISPLAY       |            |
| tof            | -499.9      | sp            | -136.8     |
| tpwr           | 58          | wp            | 3989.4     |
| pw             | 11.100      | sp1           | -126.1     |
| GRADIENTS      |             | wp1           | 3984.5     |
| gzlv11         | 1003        | rfl           | 2515.8     |
| gt1            | 0.001000    | rfp           | 1992.8     |
| gstab          | 0.000500    | rfl1          | 2514.9     |
| DECOUPLER      |             | rfl1          | 1992.8     |
| dn             | C13         | PLOT          |            |
| da             | nnn         | wc            | 155.0      |
|                |             | sc            | 10.0       |
|                |             | wc2           | 155.0      |
|                |             | sc2           | 0          |
|                |             | vs            | 1814       |
|                |             | th            | 5          |
|                |             | ai            | cdc av     |

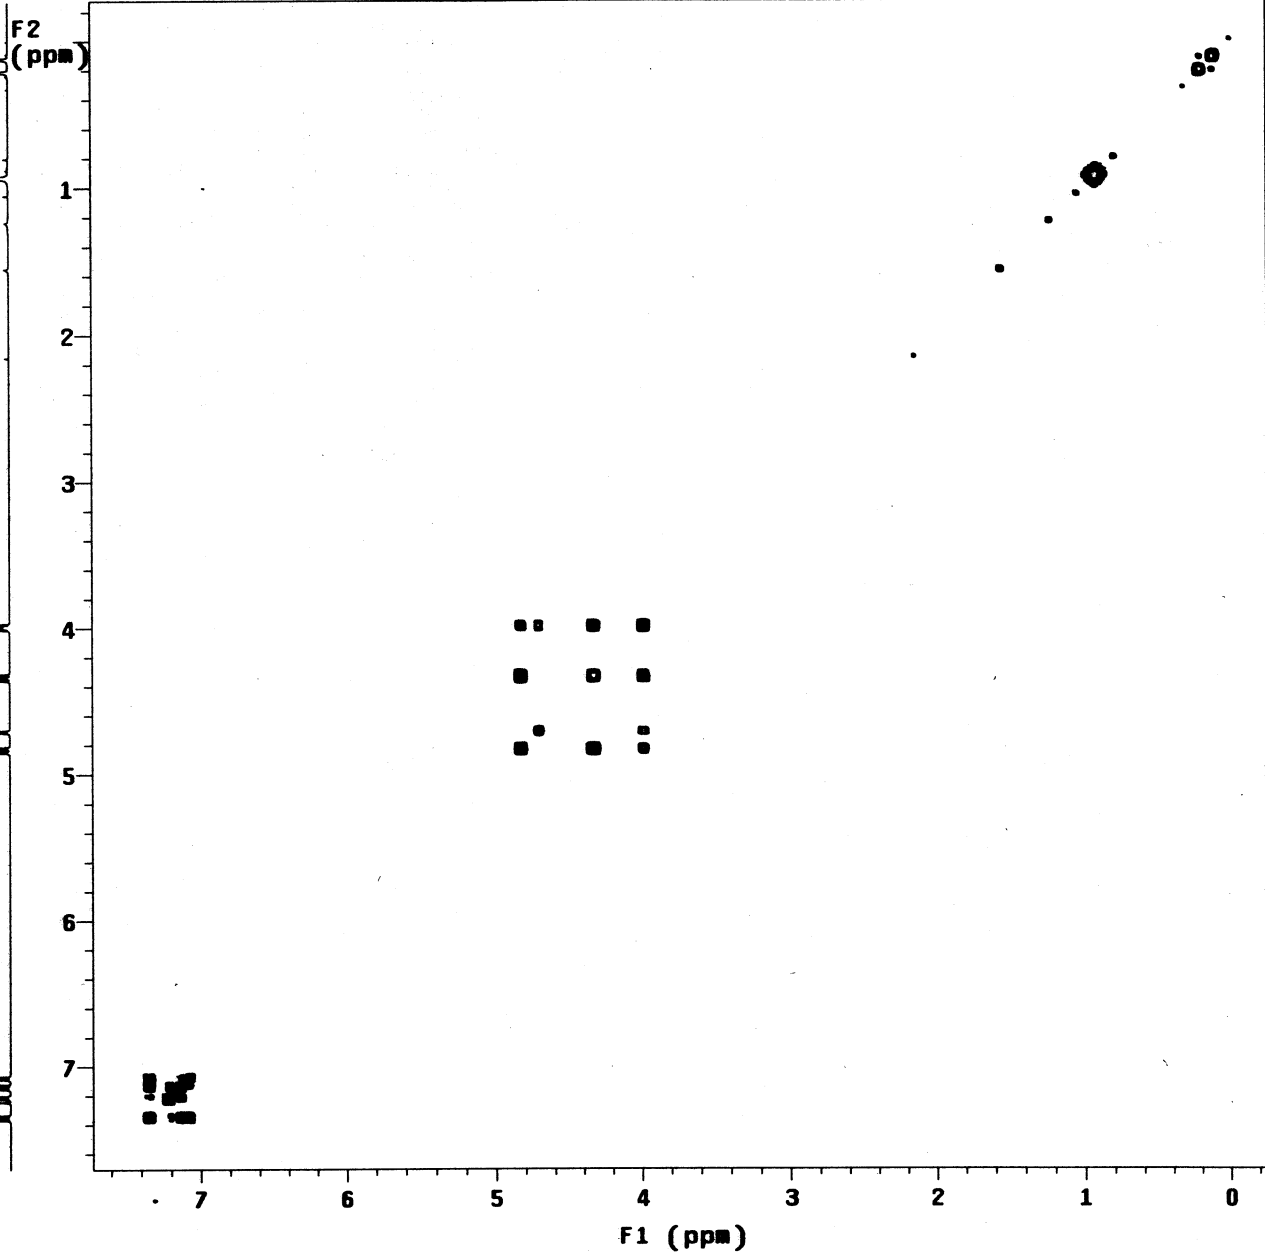

Fig S78. NOESY of compound cis-3i

# Supplementary Material (ESI) for Organic & Biomolecular Chemistry  
 PKM-02-377 # This journal is (c) The Royal Society of Chemistry 2010

exp17 NOESY

|                |             |               |          |
|----------------|-------------|---------------|----------|
| date           | May 20 2010 | hs            | n        |
| solvent        | cdcl3       | sspul         | y        |
| sample         | undefined   | PFGflg        | y        |
| ACQUISITION    |             | hsglvi        | 1003     |
| sw             | 5006.3      | SPECIAL       |          |
| at             | 0.205       | temp          | not used |
| np             | 2048        | gain          | 28       |
| fb             | not used    | spin          | 0        |
| ss             | 32          | F2 PROCESSING |          |
| d1             | 1.000       | gf            | 0.094    |
| nt             | 8           | gfs           | not used |
| 2D ACQUISITION |             | fn            | 2048     |
| sw1            | 5006.3      | F1 PROCESSING |          |
| ni             | 200         | gf1           | 0.037    |
| TRANSMITTER    |             | gfs1          | not used |
| tn             | H1          | procl         | lp       |
| sfrq           | 499.829     | fn1           | 2048     |
| tof            | -499.9      | DISPLAY       |          |
| tpwr           | 58          | sp            | -119.7   |
| pw             | 11.100      | wp            | 3911.1   |
| NOESY          |             | sp1           | -116.3   |
| mix            | 0.600       | wp1           | 3911.1   |
| PRESATURATION  |             | rfl           | 2518.3   |
| satmode        | nnnn        | rfp           | 1992.8   |
| satpwr         | 0           | rfl1          | 2514.9   |
| satdly         | 0           | rfp1          | 1992.8   |
| satfrq         | 0           | PLOT          |          |
| DECOUPLER      |             | wc            | 155.0    |
| dn             | C13         | sc            | 10.0     |
| dm             | nnn         | wc2           | 155.0    |
|                |             | sc2           | 0        |
|                |             | vs            | 1814     |
|                |             | th            | 6        |
|                |             | ai            | ph       |

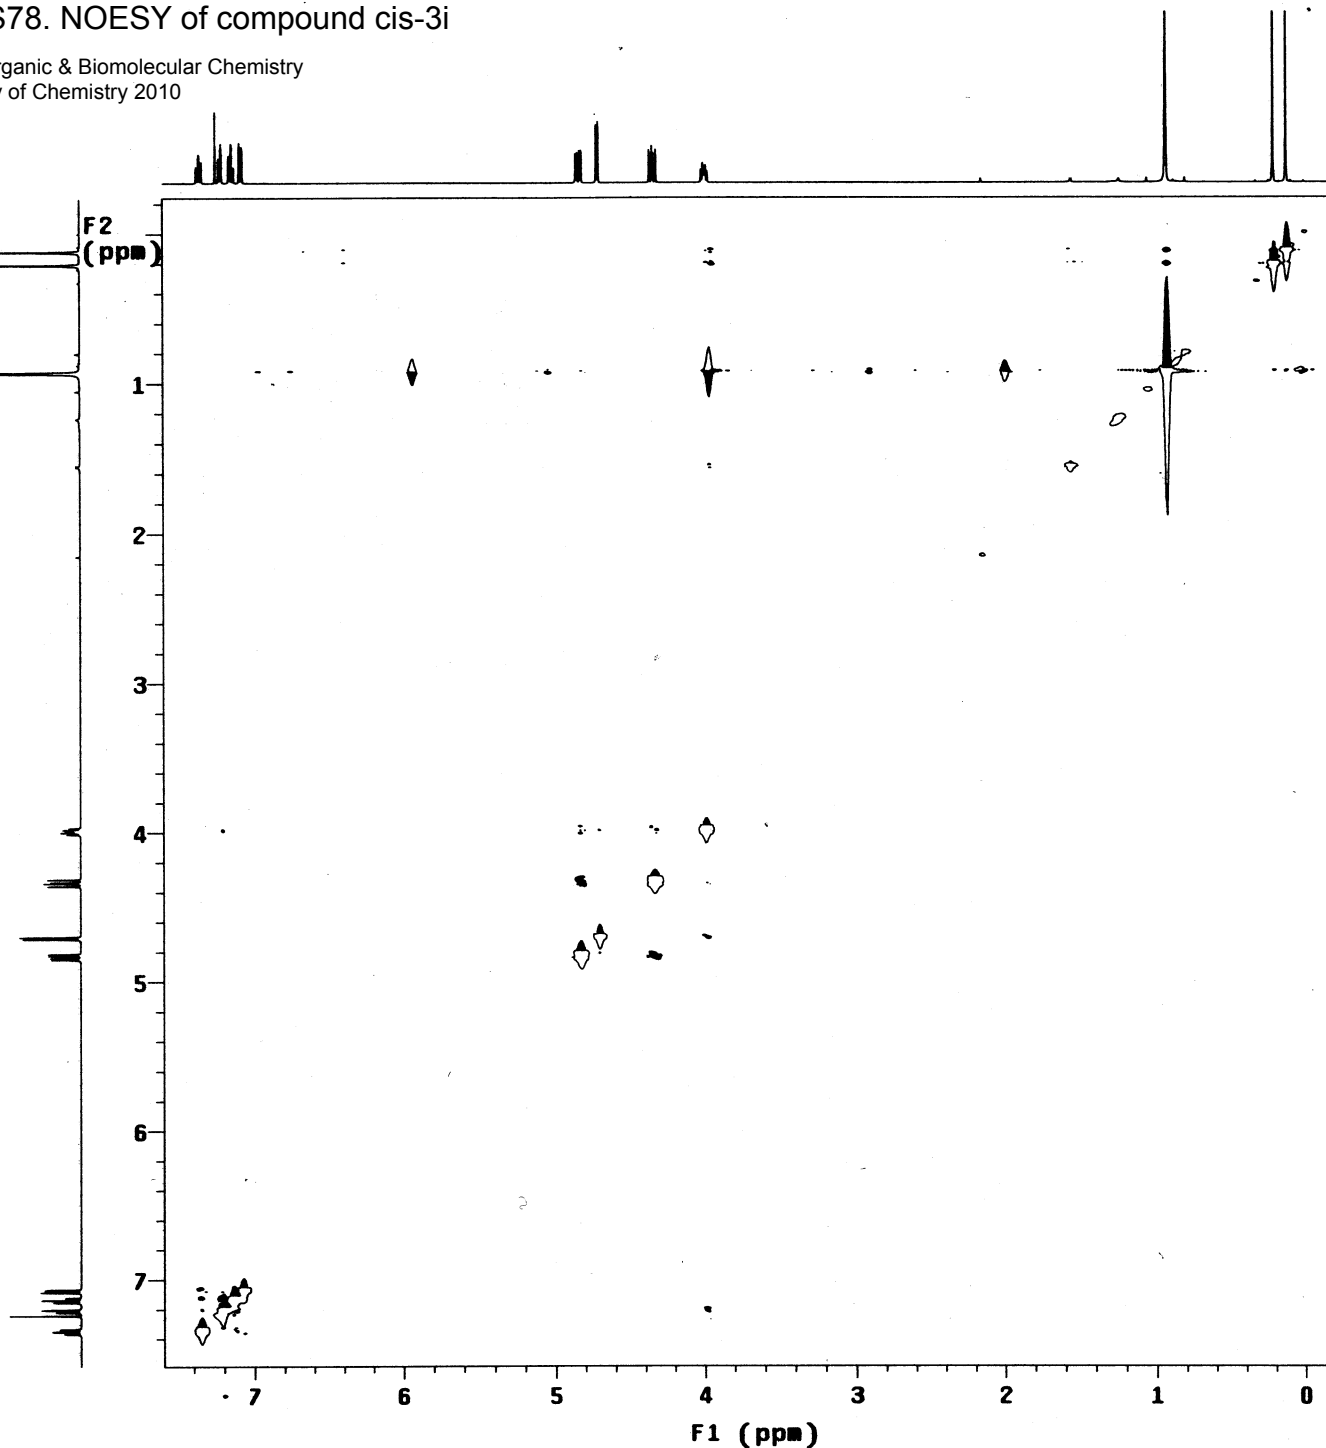

Fig S79. <sup>1</sup>H NMR (CDCl<sub>3</sub>, 500 MHz) of compound trans-3i

PMK-02-377-f2

# Supplementary Material (ESI) for Organic & Biomolecular Chemistry  
 exp23 s2011 # This journal is (c) The Royal Society of Chemistry 2010

```

SAMPLE          DEC. & VT
date Aug 4 2010 dfrq 125.693
solvent cdc13 dn C13
file exp dpwr 30
ACQUISITION    dof 0
sfrq 499.830 dm nnn
tn H1 dmm c
at 3.000 dmf 200
np 48000 dseq
sw 8000.0 dres 1.0
fb not used homo n
bs 4 temp 23.0
tpwr 58
PROCESSING
pw 4.8 wtfile
d1 1.000 proc ft
tof 499.7 fn not used
nt 4 math f
ct 4
alock y werr react
gain not used wexp procplot
FLAGS wbs
iF n wnt wft
in n
dp y
hs nn
DISPLAY
sp -250.1
wp 5498.0
vs 150
sc 0
wc 210
hzmm 26.18
is 238.74
rfl 4638.7
rfp 3618.7
th 1
ins 100.000
nm cdc ph
    
```

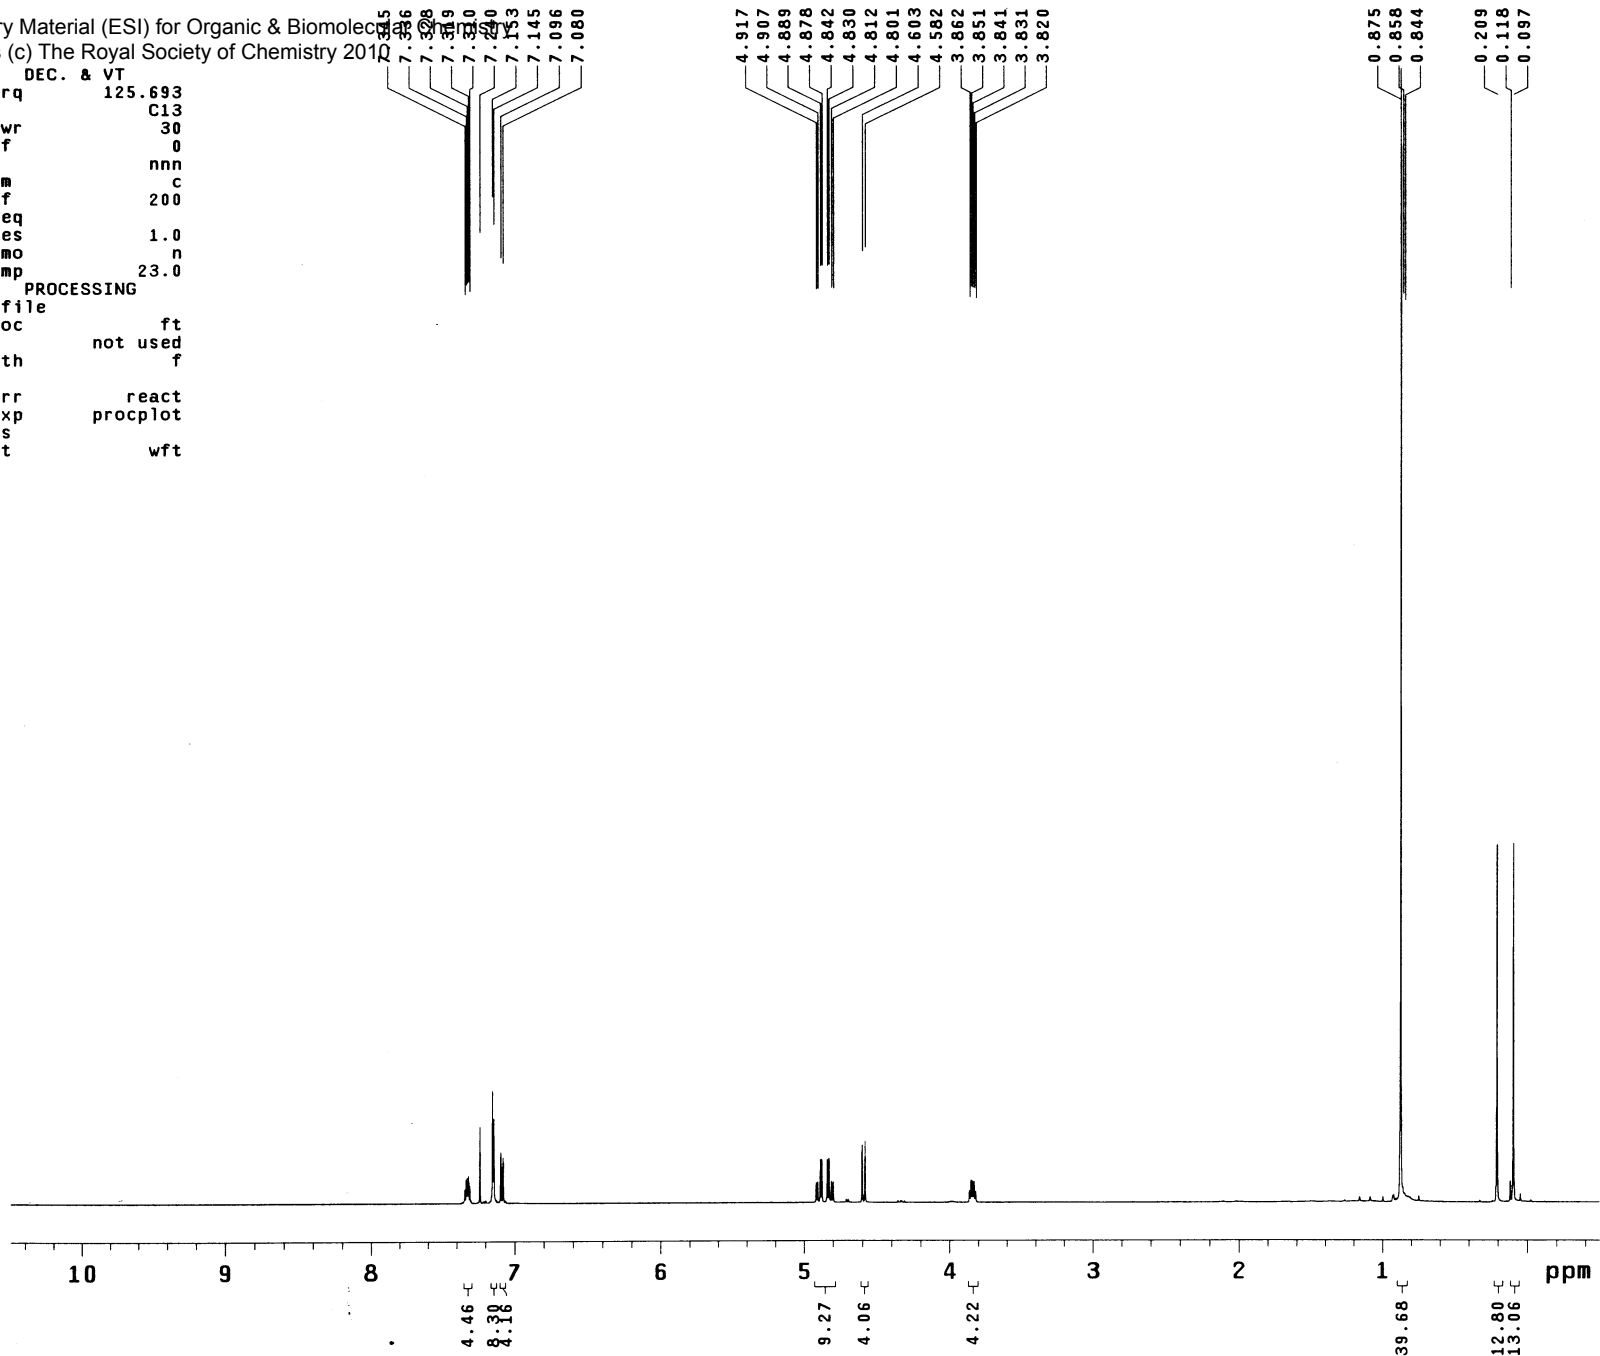

Fig S80. <sup>13</sup>C NMR (CDCl<sub>3</sub>, 125 MHz) of compound trans-3i

PMK-02-377-f2

# Supplementary Material (ESI) for Organic & Biomolecular Chemistry  
 exp24 #47111 This journal is (c) The Royal Society of Chemistry 2010

|             |            |            |          |
|-------------|------------|------------|----------|
| SAMPLE      |            | DEC. & VT  |          |
| date        | Aug 4 2010 | dfrq       | 499.829  |
| solvent     | cdc13      | dn         | H1       |
| file        | exp        | dpwr       | 39       |
| ACQUISITION |            | dof        | 0        |
| sfrq        | 125.696    | dm         | yyy      |
| tn          | C13        | dmm        | w        |
| at          | 1.000      | dmf        | 11905    |
| np          | 62894      | dseq       |          |
| sw          | 31446.5    | dres       | 1.0      |
| fb          | not used   | homo       | n        |
| bs          | 16         | temp       | 23.0     |
| ss          | 2          | PROCESSING |          |
| tpwr        | 54         | lb         | 1.00     |
| pw          | 4.0        | wtfile     |          |
| d1          | 1.000      | proc       | ft       |
| tof         | 2512.2     | fn         | not used |
| nt          | 2048       | math       | f        |
| ct          | 2048       |            |          |
| alock       | y          | werr       | react    |
| gain        | not used   | wexp       | procplot |
| FLAGS       |            | wbs        | testsn   |
| il          | n          | wnt        |          |
| in          | n          |            |          |
| dp          | y          |            |          |
| hs          | nn         |            |          |
| DISPLAY     |            |            |          |
| sp          | -1257.0    |            |          |
| wp          | 28906.3    |            |          |
| vs          | 200        |            |          |
| sc          | 0          |            |          |
| wc          | 210        |            |          |
| hzmm        | 137.65     |            |          |
| is          | 500.00     |            |          |
| rfl         | 10980.6    |            |          |
| rfp         | 9677.5     |            |          |
| th          | 11         |            |          |
| ins         | 100.000    |            |          |
| na          | cdc ph     |            |          |

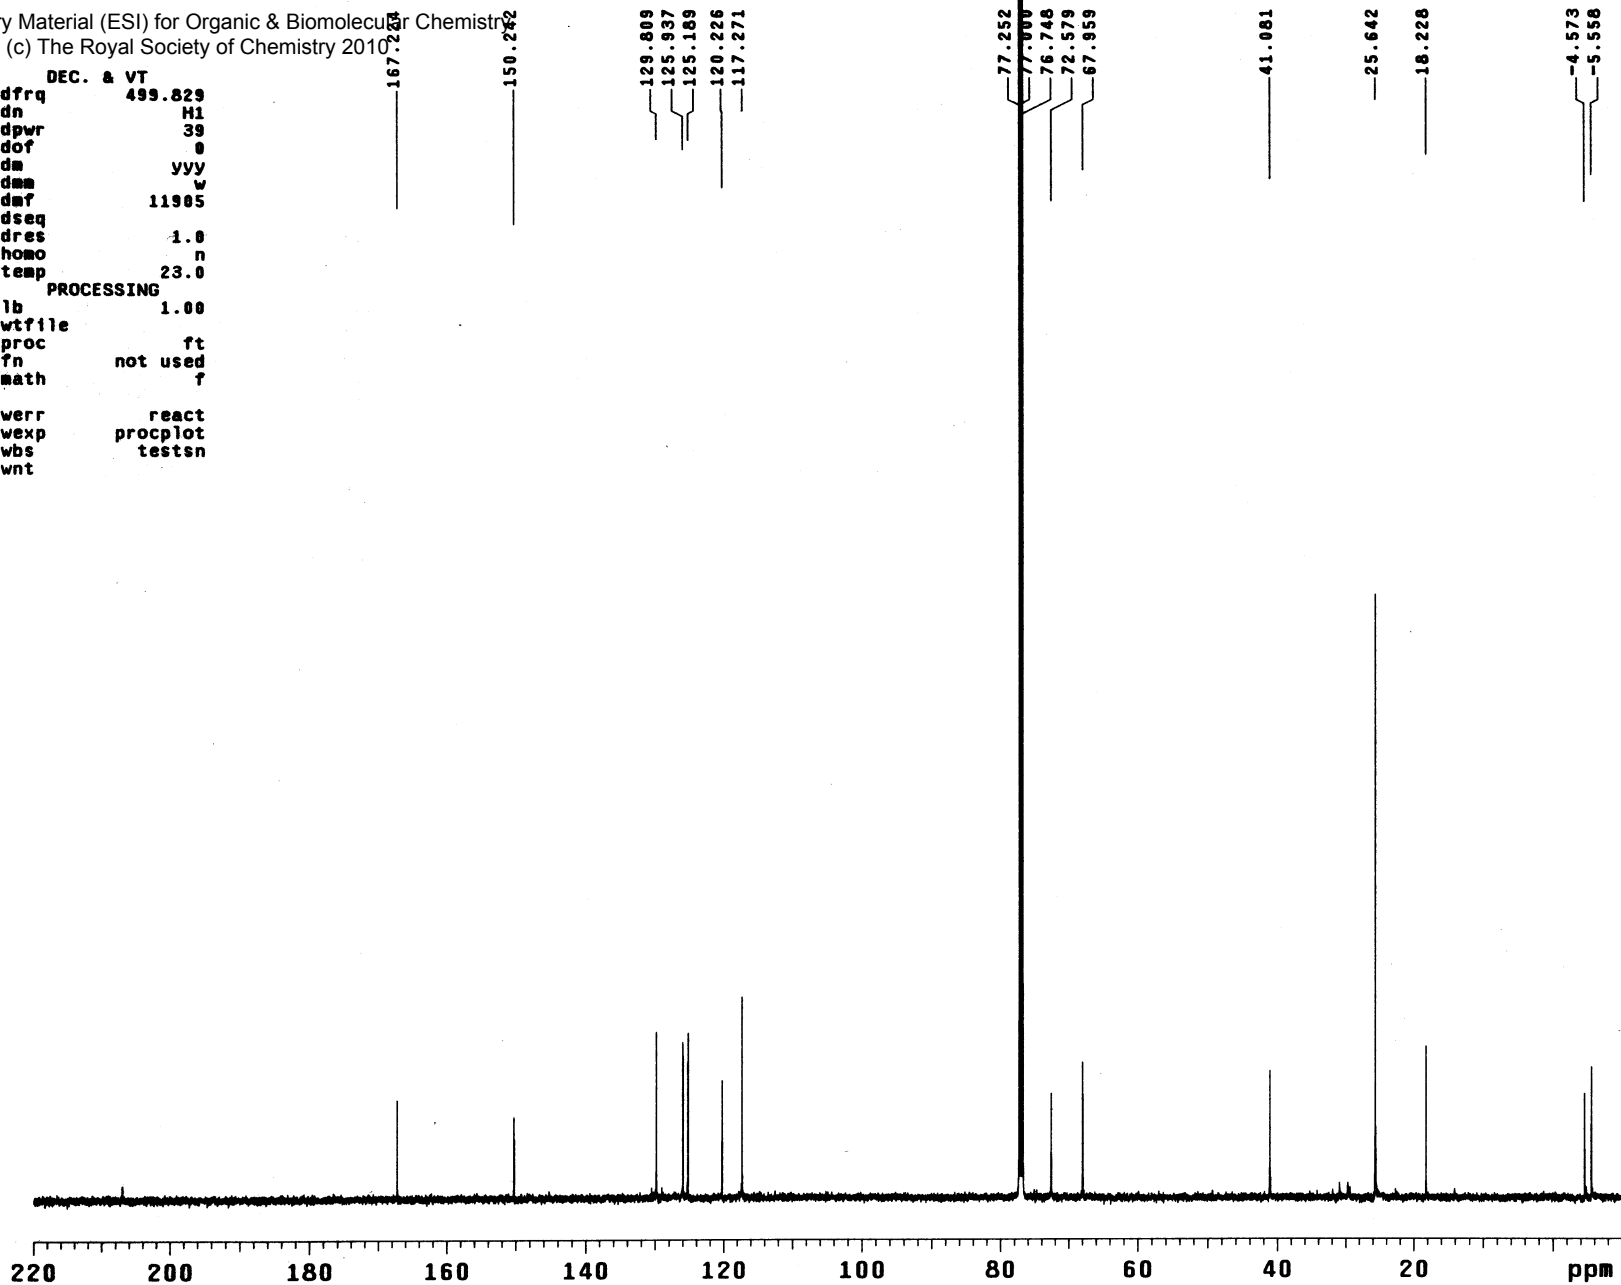



exp25 DEPT  
 # Supplementary Material (ESI) for Organic & Biomolecular Chemistry  
 SAMPLE journal is (c) The Royal Society of Chemistry  
 date Aug 4 2010 jlxh 140.0 array mult  
 solvent cdc13 mult arrayed arraydim mult 3  
 sample undefined SPECIAL  
 ACQUISITION temp 23.0 1 mult  
 sw 31446.5 gain 54 1 0.5  
 at 1.000 spin 0 2 1  
 np 62894 PROCESSING 3 1.5  
 bs 16 lb 1.00  
 ss -4 fn not used  
 di 1.000 SPECTRUM  
 nt 1024 wp 28906.3  
 ct 1024 sp -1257.0  
 TRANSMITTER rp 129.7  
 tn C13 lp 228.6  
 tof 2512.2 ai cdc ph  
 tpwr 54 REFERENCE  
 pw 11.500 rf1 1303.1  
 DECOUPLER rfp 0  
 dn H1 PLOT  
 dof 0 wc 210  
 dpwr 39 sc 0  
 dm nny vs 200  
 dmm ccw hzmm 137.65  
 dmf 11905 th 68  
 pplv1 51  
 pp 28.000

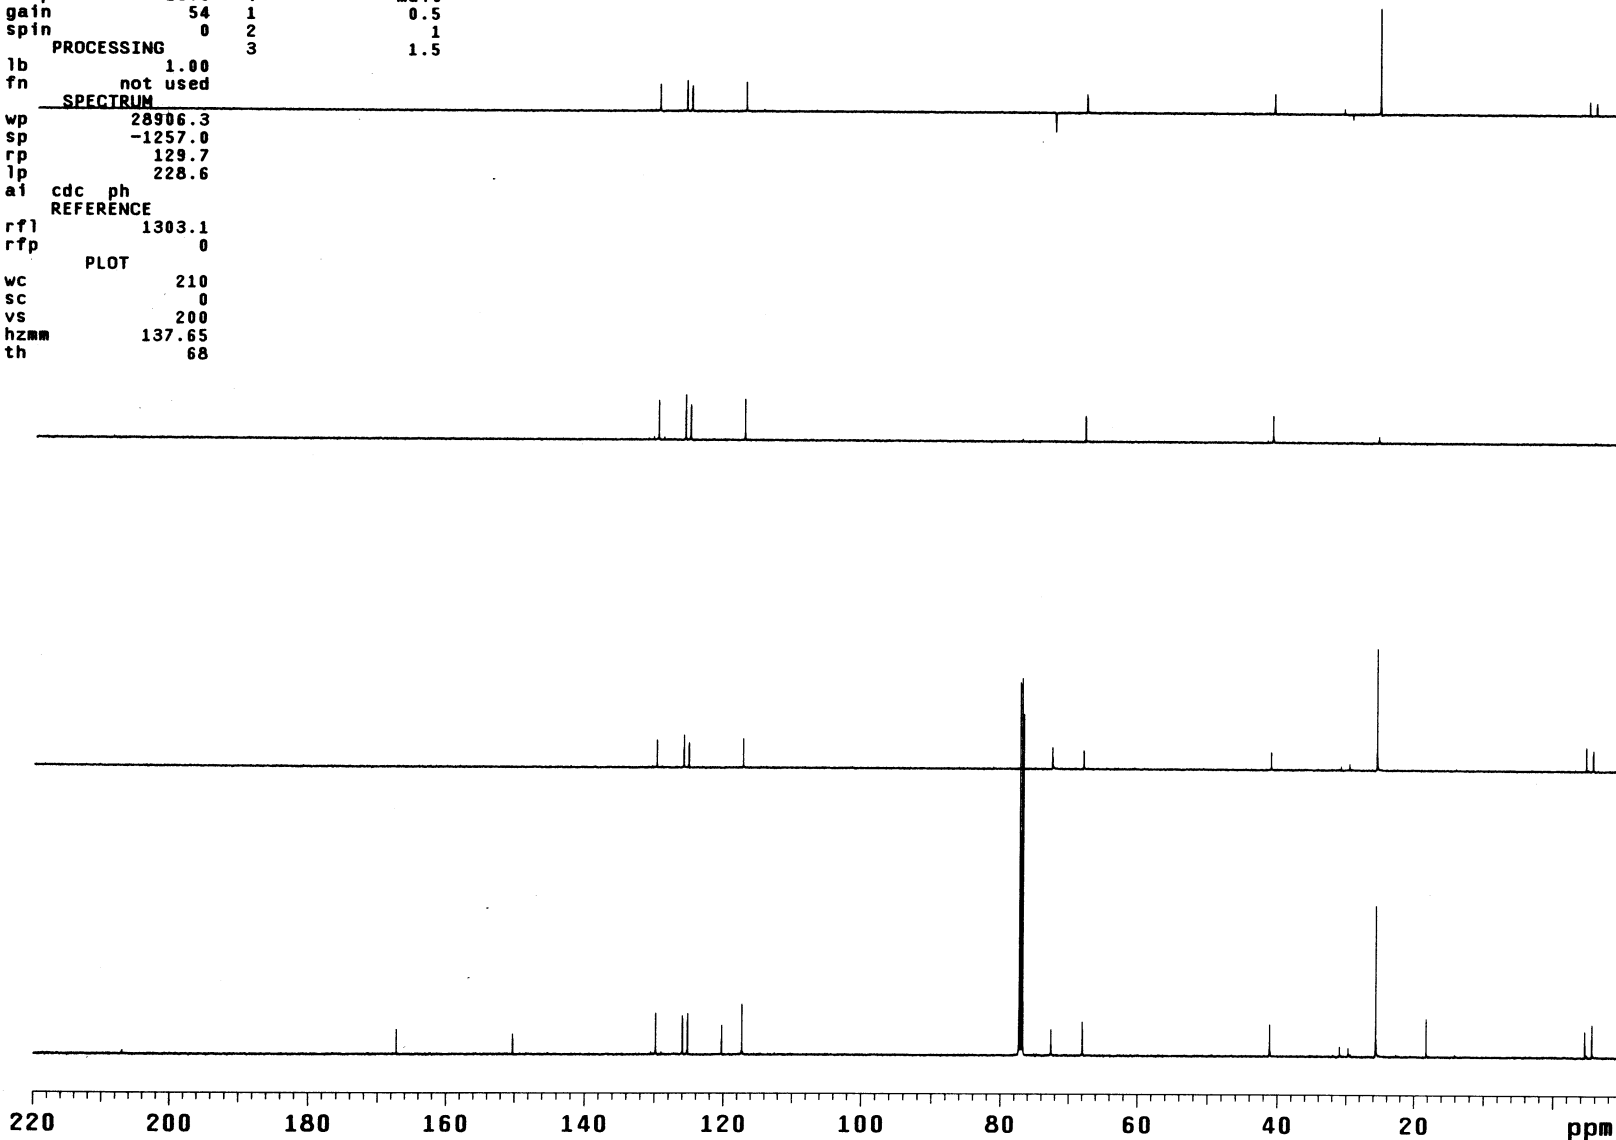

Fig S82. HSQC of compound trans-3i

PMK-02-377-f2

exp28 gHSQC # Supplementary Material (ESI) for Organic & Biomolecular Chemistry

This journal is (c) The Royal Society of Chemistry 2010  
 date Aug 4 2010 hs n array phase  
 solvent cdc13 sspul y arraydim 256  
 sample undefined PFGflg y  
 ACQUISITION hsglvi 1003 1 phase  
 sw 5006.3 SPECIAL 1 1  
 at 0.205 temp 23.0 2 2  
 np 2048 gain 20  
 fb not used spin 0  
 ss 32  
 d1 1.000 gzlvi1 1003  
 nt 8 gt1 0.002000  
 2D ACQUISITION gzlvi3 505  
 sw1 21367.5 gt3 0.001000  
 ni 128 gstab 0.000500  
 phase arrayed F2 PROCESSING  
 TRANSMITTER gf 0.094  
 tn H1 gfs not used  
 sfrq 499.829 fn 2048  
 tof -499.9 F1 PROCESSING  
 tpwr 58 gf1 0.006  
 pw 11.100 gfs1 not used  
 DECOUPLER proci 1p  
 dn C13 fn1 2048  
 dof -2515.2 DISPLAY  
 dm nny sp -495.7  
 dnm ccp wp 4522.3  
 dmf 32258 sp1 -1220.6  
 dpwr 36 wp1 18821.8  
 pwxlvi 52 rf1 2816.8  
 pwx 14.300 rfp 2295.7  
 HSQC rf11 9824.4  
 j1xh 140.0 rfp1 8541.2  
 nullflg y PLOT  
 mult 2 wc 150.0  
 sc 6.2  
 wc2 116.2  
 sc2 0  
 vs 100  
 th 4  
 ai cdc ph

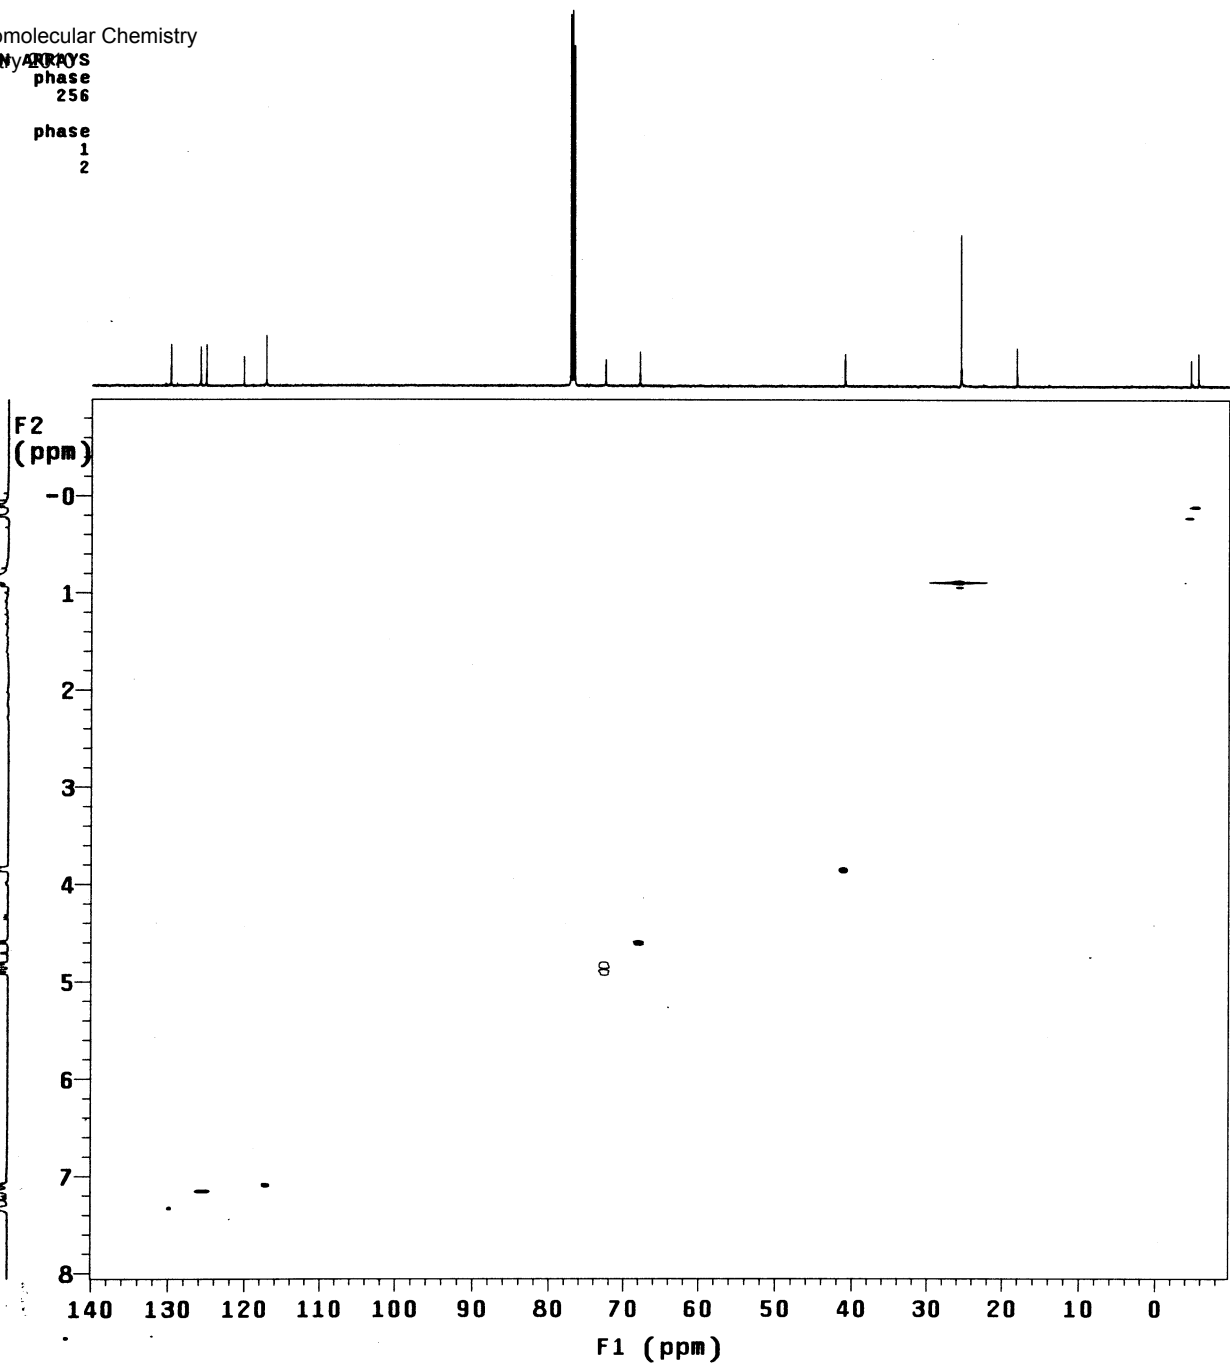

Fig S83. COSY of compound trans-3i

PMK-02-377-f2

# Supplementary Material (ESI) for Organic & Biomolecular Chemistry  
 exp26 gCOSY This journal is (c) The Royal Society of Chemistry 2010

|                |           |            |            |            |
|----------------|-----------|------------|------------|------------|
| date           | SAMPLE    | Aug 4 2010 | hs         | nn         |
| solvent        | cdc13     |            | ssp1       | n          |
| sample         | undefined |            | hsglv1     | 1003       |
| ACQUISITION    |           |            | SPECIAL    |            |
| sw             | 5006.3    | temp       | 23.0       |            |
| at             | 0.205     | gain       | 30         |            |
| np             | 2048      | spin       | 0          |            |
| fb             | not used  | F2         | PROCESSING |            |
| ss             | 16        | sb         | -0.102     |            |
| d1             | 1.000     | sbs        | not used   |            |
| nt             | 8         | fn         | 2048       |            |
| 2D ACQUISITION |           |            | F1         | PROCESSING |
| sw1            | 5006.3    | sb1        | -0.026     |            |
| ni             | 128       | sbs1       | not used   |            |
| TRANSMITTER    |           |            | procl      | lp         |
| tn             | H1        | fn1        | 2048       |            |
| sfrq           | 499.829   | DISPLAY    |            |            |
| tof            | -499.9    | sp         | -131.9     |            |
| tpwr           | 58        | wp         | 3916.0     |            |
| pw             | 11.100    | sp1        | -126.3     |            |
| GRADIENTS      |           |            | wp1        | 3911.1     |
| gzlv11         | 1003      | rf1        | 2818.8     |            |
| gt1            | 0.001000  | rfp        | 2295.7     |            |
| gstab          | 0.000500  | rf11       | 2818.0     |            |
| DECOUPLER      |           |            | rfp1       | 2295.7     |
| dn             | C13       | PLOT       |            |            |
| dm             | nnn       | wc         | 155.0      |            |
|                |           | sc         | 10.0       |            |
|                |           | wc2        | 155.0      |            |
|                |           | sc2        | 0          |            |
|                |           | vs         | 100        |            |
|                |           | th         | 3          |            |
|                |           | al         | cdc av     |            |

F2 (ppm)

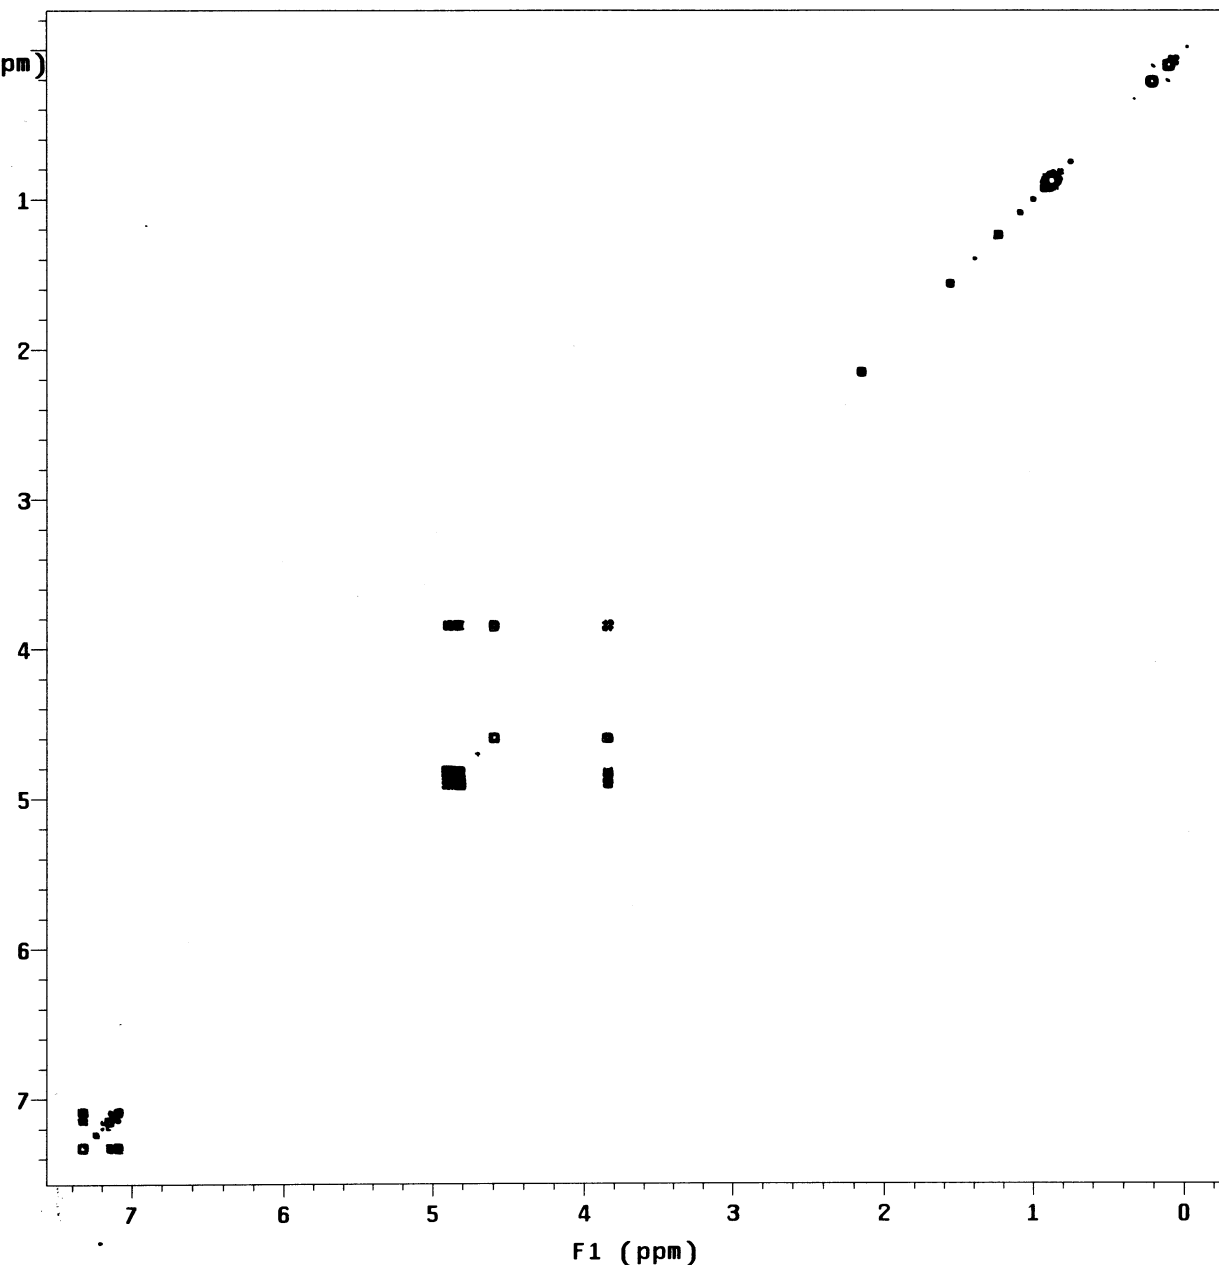

F1 (ppm)

Fig S84. NOESY of compound trans-3i

PMK-02-37 Supplementary Material (ESI) for Organic & Biomolecular Chemistry  
 # This journal is (c) The Royal Society of Chemistry 2010

```

SAMPLE          FLAGS
date Aug 4 2010 hs          n
solvent cdc13    sspul         y
sample undefined PFGflg    y
exp27 NOESY     hsglvi     1003
ACQUISITION
sw 5006.3       SPECIAL
at 0.205       temp        23.0
np 2048        gain        30
fb not used    spin        0
ss 32         F2 PROCESSING
d1 1.000      gf          0.094
nt 8         gfs        not used
2D ACQUISITION
sw1 5006.3    F1 PROCESSING
n1 200       gf1        0.037
TRANSMITTER
tn H1        gfs1       not used
sfrq 499.829 proc1      1p
tof -499.9   fn1       2048
tpwr 58      sp        -97.2
pw 11.100   wp        3847.6
mix NOESY   wp1       -97.1
PRESATURATION
satmode nnnn   rfp       3847.6
satpwr 0     rf1      2818.2
satdly 0     rf11     2818.2
satfrq 0     rfpi     2295.7
DECOUPLER
dn C13      wc        155.0
dm nnn     sc        10.0
          wc2      155.0
          sc2      0
          vs       100
          th       1
          ai      ph
    
```

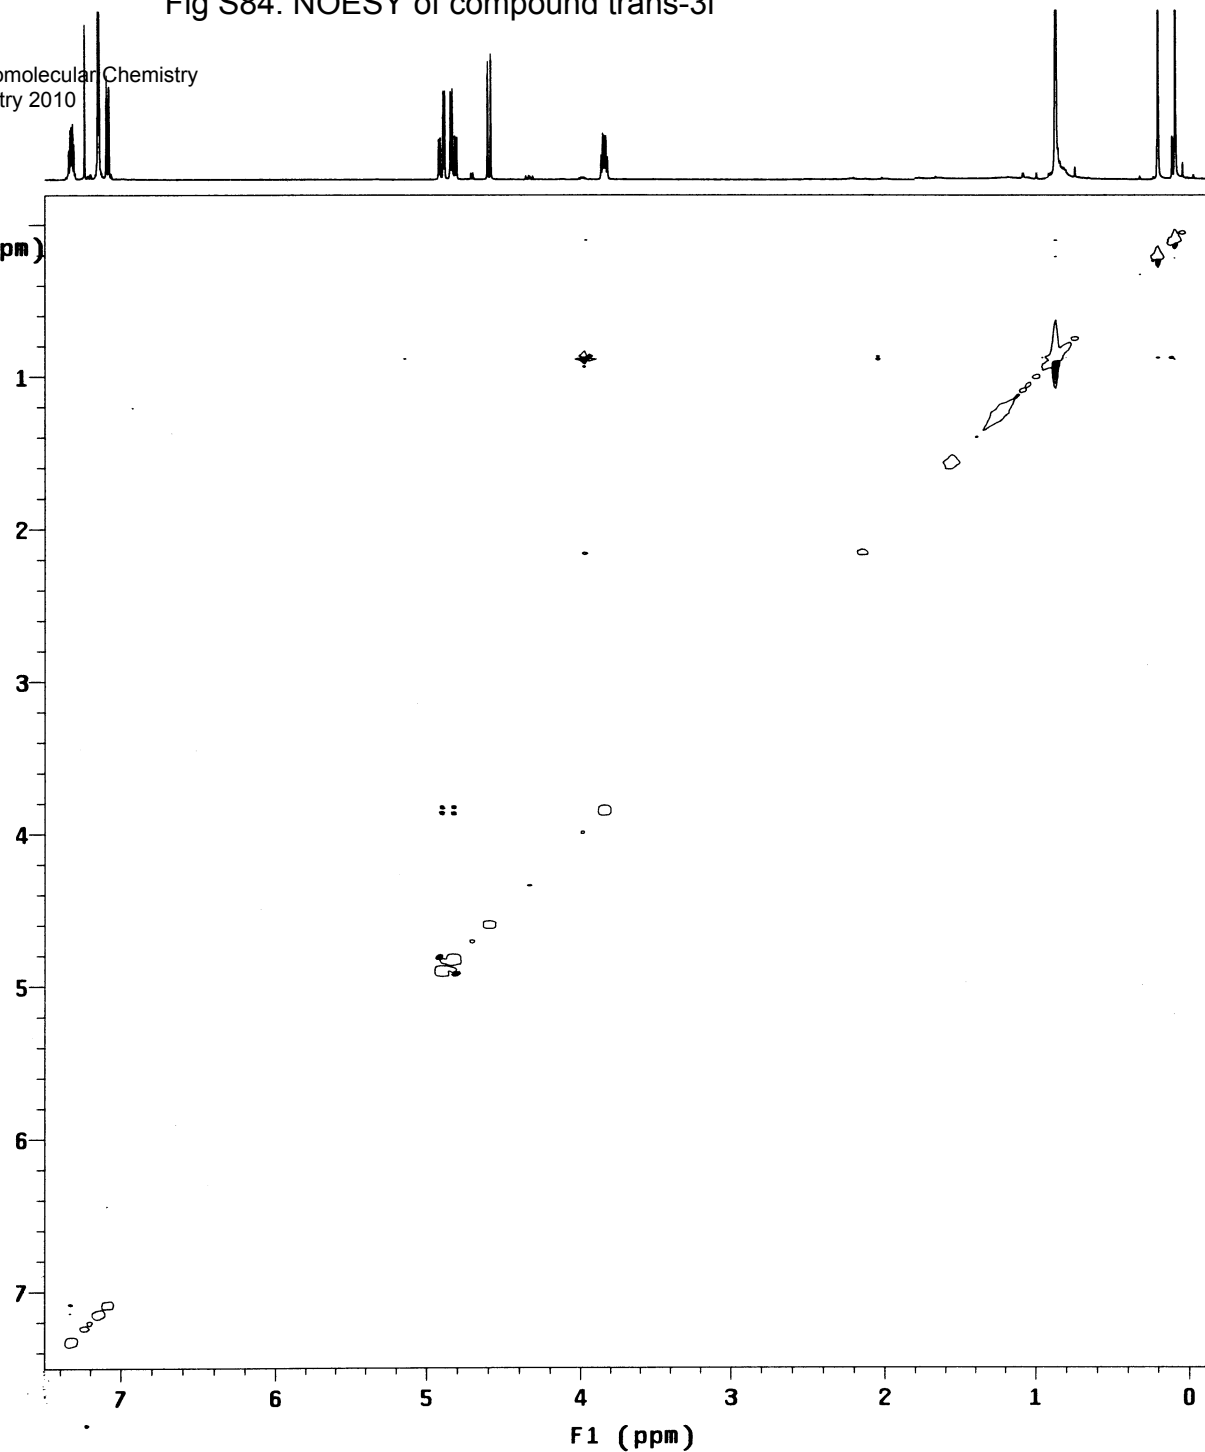

Fig S85. <sup>1</sup>H NMR (CDCl<sub>3</sub>, 500 MHz) of compound 3j

PMK-02-360  
 # Supplementary Material (ESI) for Organic & Biomolecular Chemistry  
 This journal is (c) The Royal Society of Chemistry 2010

```

SAMPLE          DEC. & VT
date            Apr 7 2010
solvent         cdc13
file            exp
ACQUISITION
sfrq            499.830
tn              H1
at              3.000
np              48000
sw              8000.0
fb              not used
bs              4
tpwr            58
pw              4.8
d1              1.000
tof             499.7
nt              4
ct              4
alock           y
gain            not used
FLAGS
il              n
in              n
dp              y
hs              nn
DISPLAY
sp              -250.1
wp              5248.0
vs              100
sc              0
wc              210
hzmm           24.99
is              266.35
rf1             4637.5
rfp             3618.7
th              4
ins            100.000
nm cdc ph
    
```

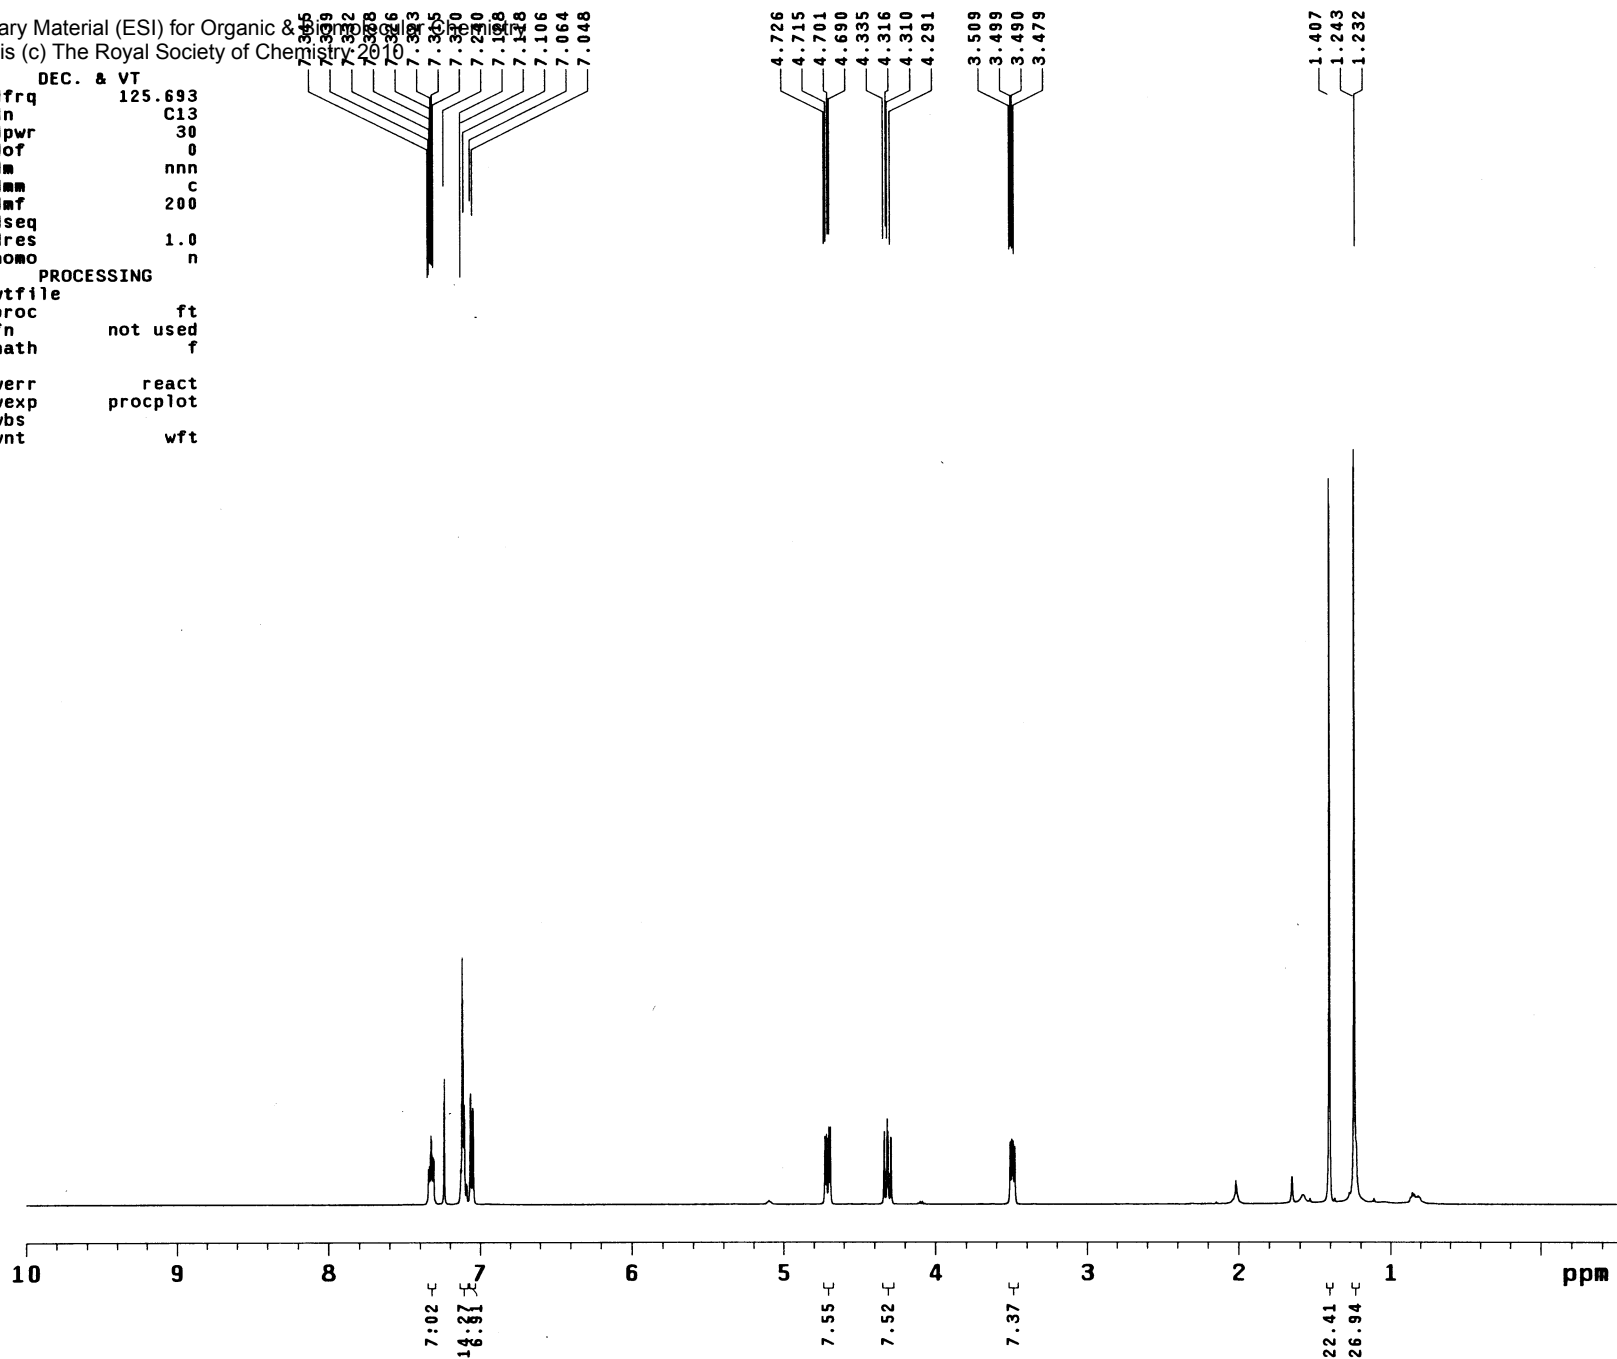

Fig S86. <sup>13</sup>C NMR (CDCl<sub>3</sub>, 125 MHz) of compound 3j

# Supplementary Material (ESI) for Organic & Biomolecular Chemistry  
 PMK-02-300 This journal is (c) The Royal Society of Chemistry 2010

exp14 s2pu1

|             |            |            |          |
|-------------|------------|------------|----------|
| SAMPLE      |            | DEC. & VT  |          |
| date        | Apr 7 2010 | dfrq       | 499.829  |
| solvent     | cdcl3      | dn         | H1       |
| file        | exp        | dpwr       | 39       |
| ACQUISITION |            | dof        | 0        |
| sfrq        | 125.696    | dm         | yyy      |
| tn          | C13        | dmm        | w        |
| at          | 1.000      | dmf        | 11905    |
| np          | 62894      | dseq       |          |
| sw          | 31446.5    | dres       | 1.0      |
| fb          | not used   | homo       | n        |
| bs          | 16         | PROCESSING |          |
| ss          | 2          | lb         | 1.00     |
| tpwr        | 54         | wtfile     |          |
| pw          | 4.0        | proc       | ft       |
| di          | 1.000      | fn         | not used |
| tof         | 2512.2     | math       | f        |
| nt          | 2048       |            |          |
| ct          | 2048       | werr       | react    |
| alock       | y          | wexp       | procplot |
| gain        | not used   | wbs        | testsn   |
| FLAGS       |            | wnt        |          |
| il          | n          |            |          |
| in          | n          |            |          |
| dp          | y          |            |          |
| hs          | nn         |            |          |
| DISPLAY     |            |            |          |
| sp          | -1257.0    |            |          |
| wp          | 28906.3    |            |          |
| vs          | 100        |            |          |
| sc          | 0          |            |          |
| wc          | 210        |            |          |
| hzmm        | 137.65     |            |          |
| is          | 500.00     |            |          |
| rfl         | 10983.4    |            |          |
| rfp         | 9677.5     |            |          |
| th          | 6          |            |          |
| ins         | 100.000    |            |          |
| nm          | cdc ph     |            |          |

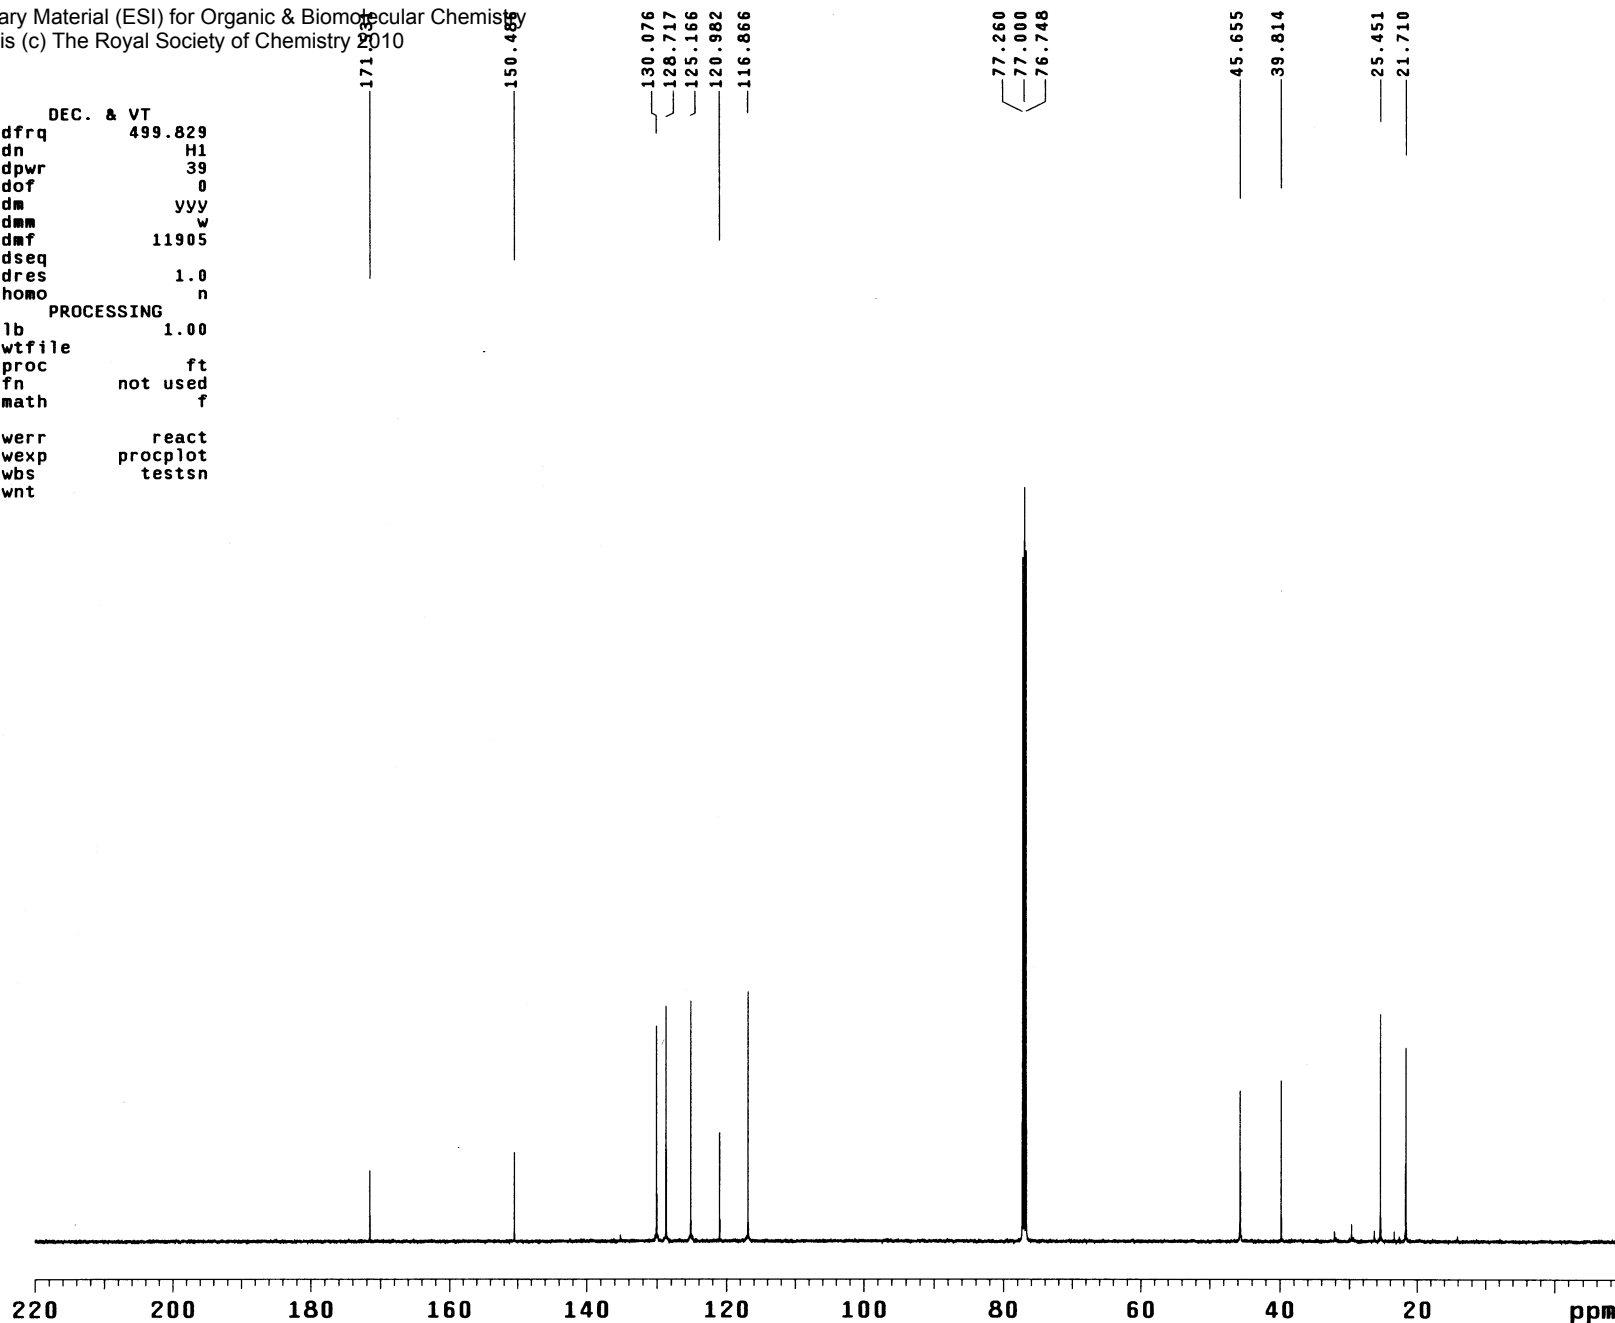

Fig S87. DEPT of compound 3j

# Supplementary Material (ESI) for Organic & Biomolecular Chemistry  
 # This journal is (c) The Royal Society of Chemistry 2010  
 exp15 DEPT

|            |             |            |                    |
|------------|-------------|------------|--------------------|
| date       | SAMPLE      | DEPT       | ACQUISITION ARRAYS |
| Apr 7 2010 |             | 140.0      | array              |
| solvent    | cdcl3       | arrayed    | mult               |
| sample     | undefined   | SPECIAL    | arraydim           |
|            |             | temp       | 1                  |
| sw         | 31446.5     | gain       | 28                 |
| at         | 1.000       | spin       | 0                  |
| np         | 62894       | PROCESSING | 3                  |
| bs         | 16          | lb         | 1.00               |
| ss         | -4          | fn         | not used           |
| d1         | 1.000       | SPECTRUM   |                    |
| nt         | 2048        | wp         | 28906.3            |
| ct         | 2048        | sp         | -1257.0            |
|            | TRANSMITTER | rp         | 48.8               |
| tn         | C13         | lp         | 201.1              |
| tof        | 2512.2      | ai         | cdc ph             |
| tpwr       | 54          | REFERENCE  |                    |
| pw         | 11.500      | rfl        | 1306.9             |
|            | DECOUPLER   | rfp        | 0                  |
| dn         | H1          | PLOT       |                    |
| dof        | 0           | wc         | 210                |
| dpwr       | 39          | sc         | 0                  |
| dm         | nny         | vs         | 100                |
| dmm        | ccw         | hzmm       | 137.65             |
| dmf        | 11905       | th         | 7                  |
| pplvl      | 51          |            |                    |
| pp         | 25.600      |            |                    |

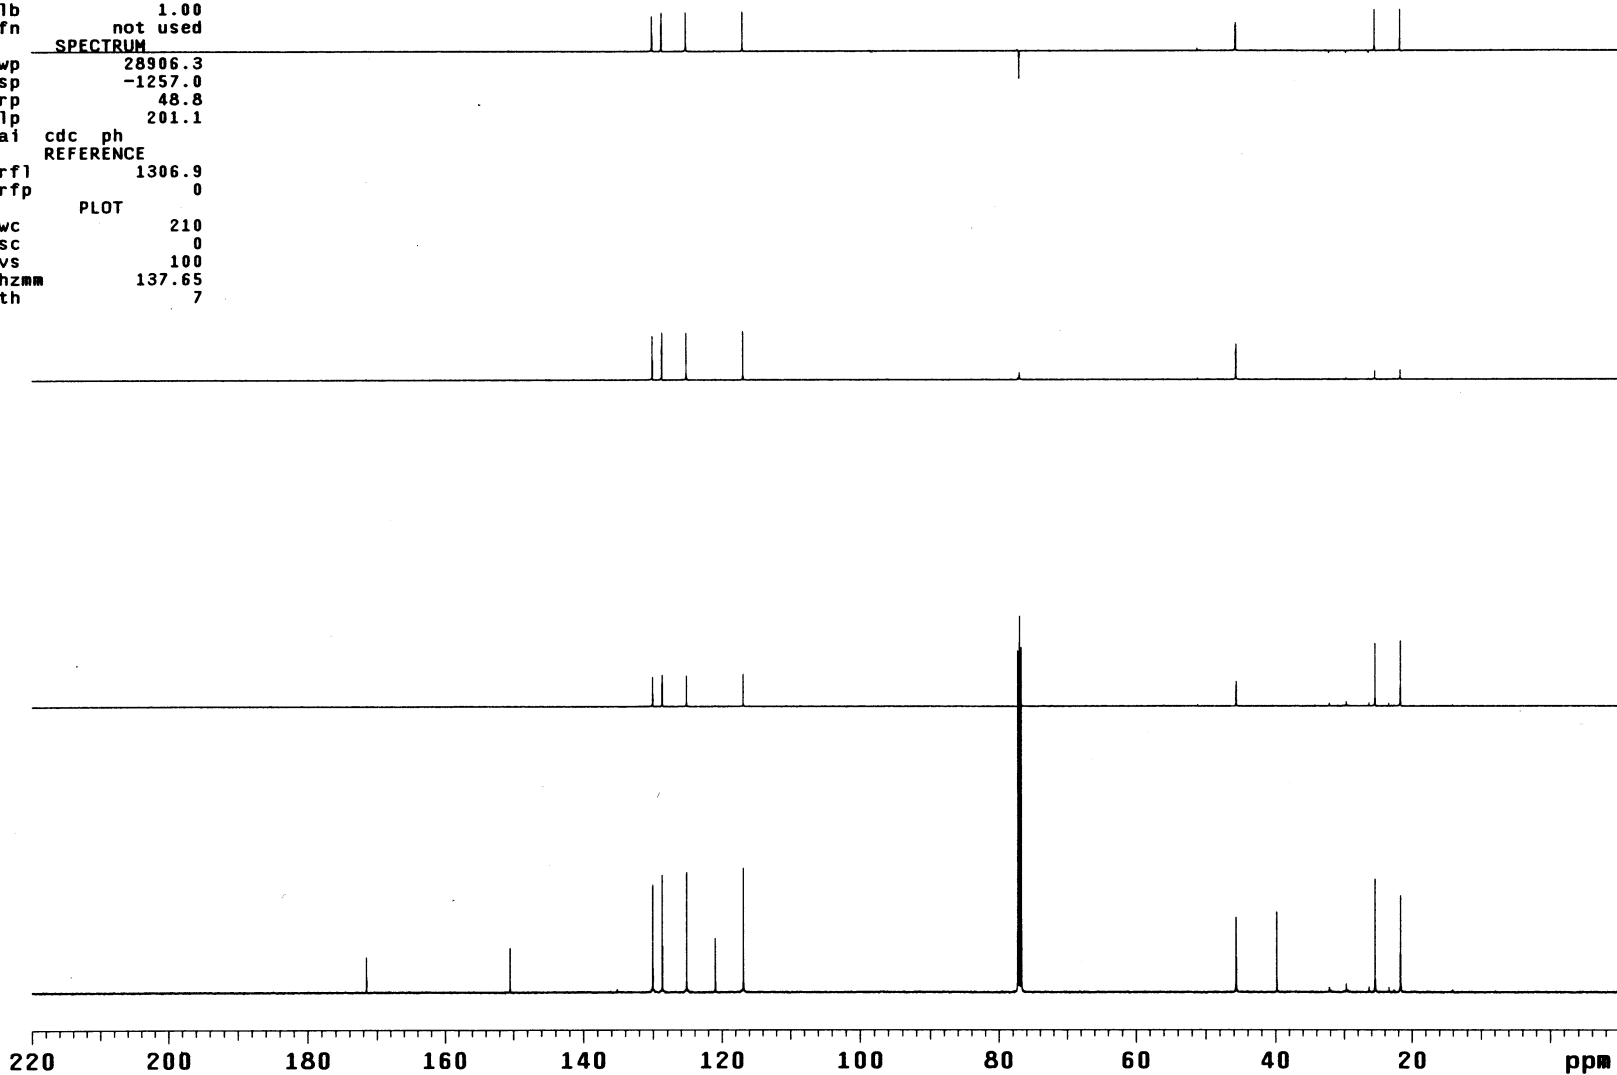

Fig S88. 13C of compound 3j (Extracted from DEPT)

# Supplementary Material (ESI) for Organic & Biomolecular Chemistry  
 This journal is (c) The Royal Society of Chemistry 2010

exp15 DEPT

|         |             |            |          |       |             |        |
|---------|-------------|------------|----------|-------|-------------|--------|
| date    | Apr 7 2010  | j1xh       | DEPT     | 140.0 | ACQUISITION | ARRAYS |
| solvent | cdc13       | mult       | arrayed  |       | array       | mult   |
| sample  | undefined   |            | SPECIAL  |       | arraydim    | 3      |
|         | ACQUISITION | temp       | not used | i     |             | mult   |
| sw      | 31446.5     | gain       | 28       | 1     |             | 0.5    |
| at      | 1.000       | spin       | 0        | 2     |             | 1      |
| np      | 62894       | PROCESSING |          | 3     |             | 1.5    |
| bs      | 16          | lb         | 1.00     |       |             |        |
| ss      | -4          | fn         | not used |       |             |        |
| d1      | 1.000       | SPECTRUM   |          |       |             |        |
| nt      | 2048        | wp         | 28906.3  |       |             |        |
| ct      | 2048        | sp         | -1257.0  |       |             |        |
|         | TRANSMITTER | rp         | 48.8     |       |             |        |
| tn      | C13         | lp         | 201.1    |       |             |        |
| tof     | 2512.2      | ai         | cdc ph   |       |             |        |
| tpwr    | 54          | REFERENCE  |          |       |             |        |
| pw      | 11.500      | rfl        | 1306.9   |       |             |        |
|         | DECOUPLER   | rfp        | 0        |       |             |        |
| dn      | H1          | PLOT       |          |       |             |        |
| dof     | 0           | wc         | 210      |       |             |        |
| dpwr    | 39          | sc         | 0        |       |             |        |
| dm      | nny         | vs         | 300      |       |             |        |
| dmm     | ccw         | hzmm       | 137.65   |       |             |        |
| dmf     | 11905       | th         | 7        |       |             |        |
| pplv1   | 51          |            |          |       |             |        |
| pp      | 25.600      |            |          |       |             |        |

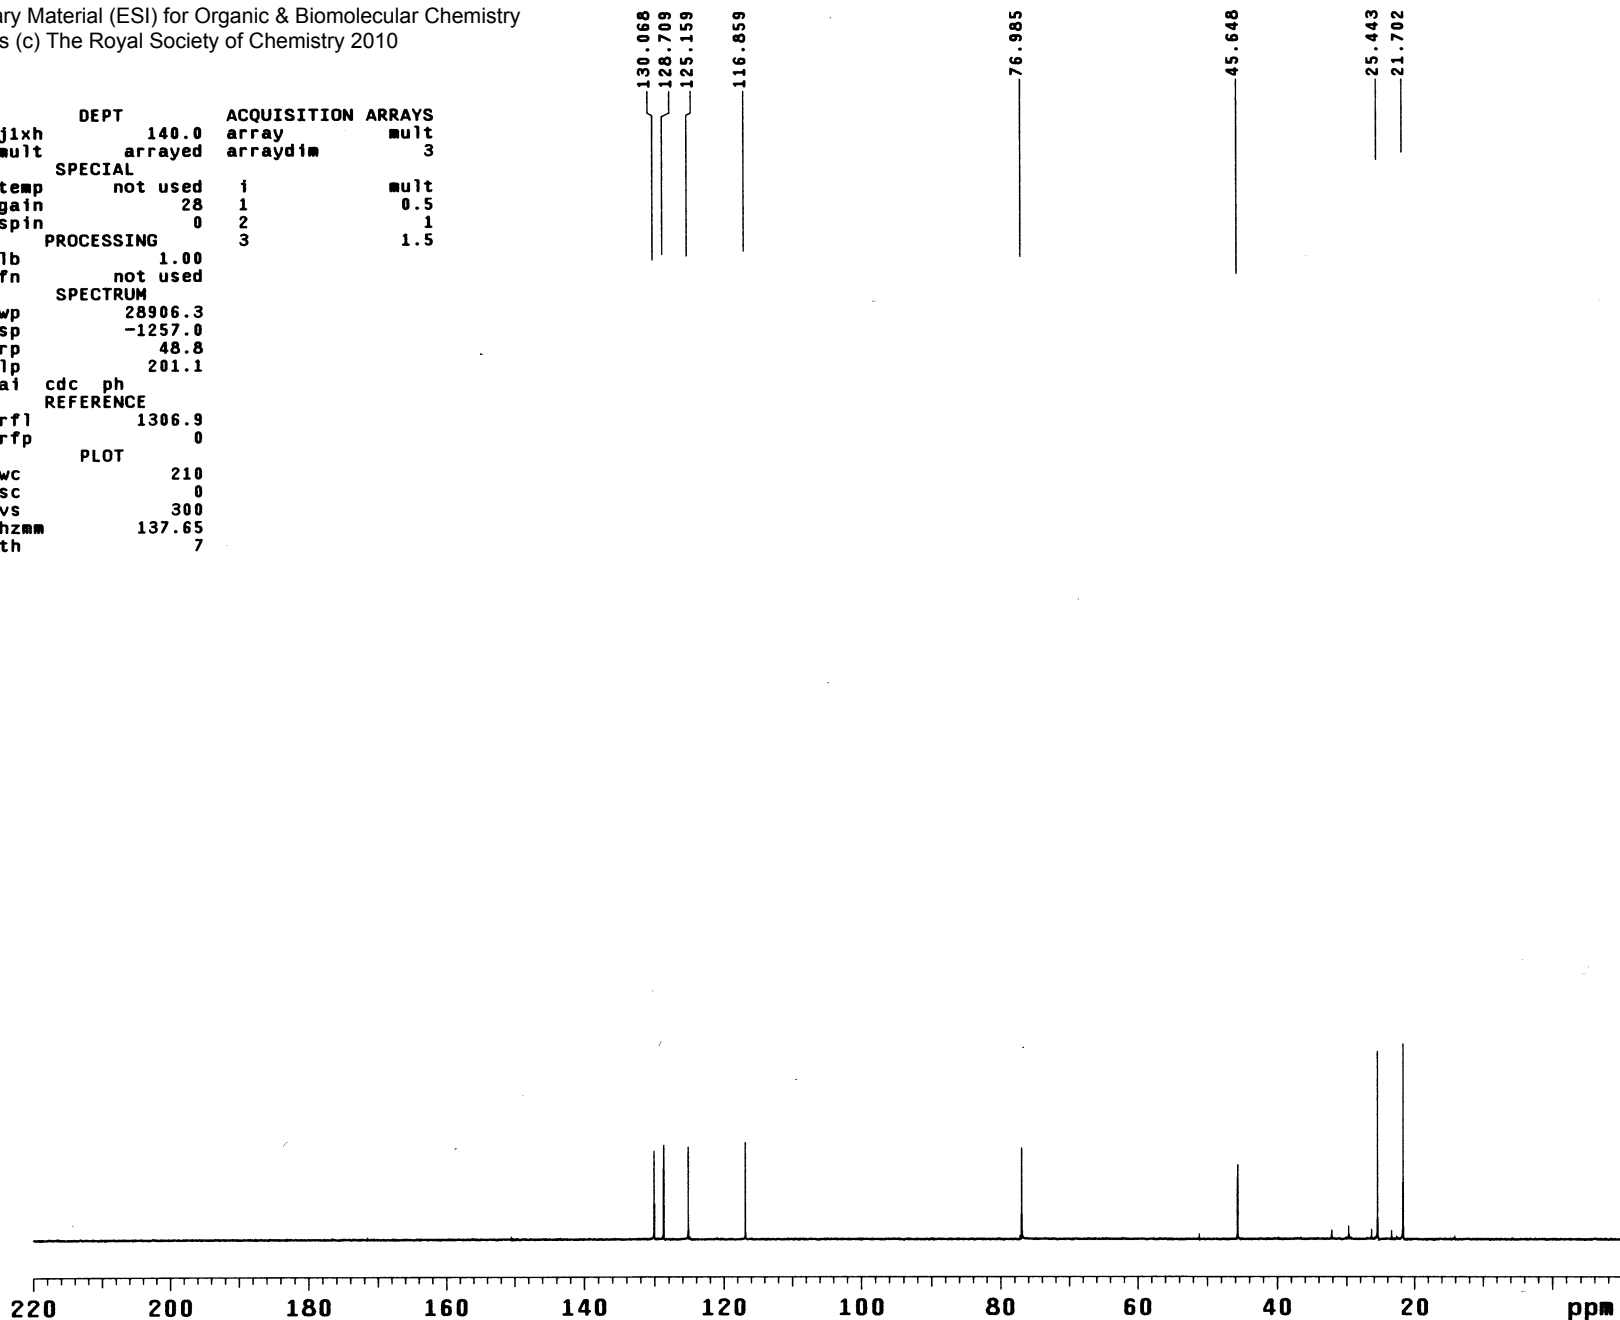



Fig S89. 13C of compound 3j (Extracted from DEPT, Expand.)

PMK-02-36# Supplementary Material (ESI) for Organic & Biomolecular Chemistry  
 # This journal is (c) The Royal Society of Chemistry 2010

```

exp15 DEPT
SAMPLE          DEPT          ACQUISITION ARRAYS
date Apr 7 2010 j1xh          140.0          array          mult
solvent cdc13      mult          arrayed        arraydim        3
sample undefined SPECIAL
ACQUISITION     temp          not used       1              mult
sw 31446.5      gain          28            1              0.5
at 1.000        spin          0             2              1
np 62894        PROCESSING    3             3              1.5
bs 16          lb           1.00
ss -4          fn           not used
di 1.000      SPECTRUM
nt 2048      wp           1759.1
ct 2048      sp           8797.5
TRANSMITTER     rp           48.8
tn C13        lp           201.1
tof 2512.2    ai          cdc ph
tpwr 54        REFERENCE
pw 11.500     rfl         1306.9
DECOUPLER       rfp         0
dn H1          PLOT
dof 0         wc           210
dpwr 39      sc           0
dm nny        vs           500
dmm ccw        hzmm        8.38
dmf 11905    th           7
pp1v1 51
pp 25.600
    
```

76.985

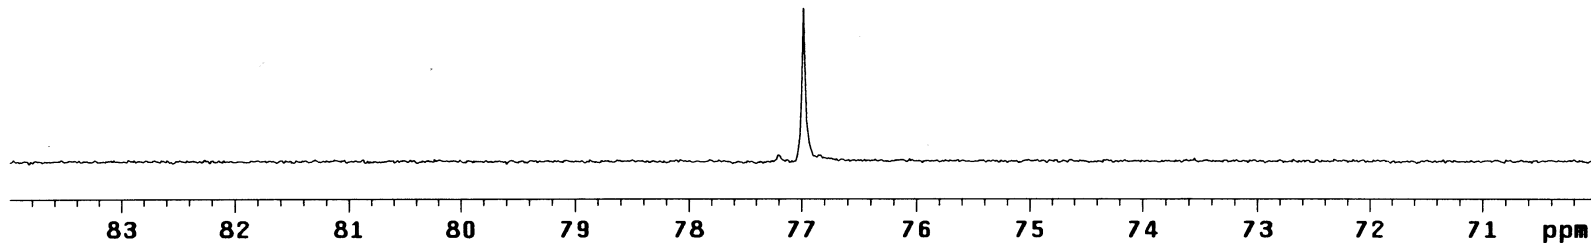

Fig S90. HSQC of compound 3j

# Supplementary Material (ESI) for Organic & Biomolecular Chemistry  
 # This journal is (c) The Royal Society of Chemistry 2010

exp18 gHSQC

| SAMPLE         |            | FLAGS         | ACQUISITION ARRAYS |       |
|----------------|------------|---------------|--------------------|-------|
| date           | Apr 7 2010 | hs            | n                  | array |
| solvent        | cdc13      | sspul         | y                  | phase |
| sample         | undefined  | PFGflg        | y                  | 256   |
| ACQUISITION    |            | hsglvl        | 1003               | 1     |
| sw             | 4490.3     | SPECIAL       | 1                  | phase |
| at             | 0.228      | temp          | not used           | 2     |
| np             | 2048       | gain          | 20                 |       |
| fb             | not used   | spin          | 0                  |       |
| ss             | 32         | GRADIENTS     |                    |       |
| d1             | 1.000      | gzlv11        | 1003               |       |
| nt             | 8          | gt1           | 0.002000           |       |
| 2D ACQUISITION |            | gzlv13        | 505                |       |
| sw1            | 21367.5    | gt3           | 0.001000           |       |
| ni             | 128        | gstab         | 0.000500           |       |
| phase          | arrayed    | F2 PROCESSING |                    |       |
| TRANSMITTER    |            | gf            | 0.105              |       |
| tn             | H1         | gfs           | not used           |       |
| sfrq           | 499.829    | fn            | 2048               |       |
| tof            | -250.0     | F1 PROCESSING |                    |       |
| tpwr           | 58         | gf1           | 0.006              |       |
| pw             | 11.100     | gfs1          | not used           |       |
| DECOUPLER      |            | proc1         | 1p                 |       |
| dn             | C13        | fn1           | 2048               |       |
| dof            | -2515.2    | DISPLAY       |                    |       |
| dm             | nny        | sp            | 482.0              |       |
| dmm            | ccp        | wp            | 3455.5             |       |
| dmf            | 32258      | sp1           | 2085.5             |       |
| dpwr           | 36         | wp1           | 14961.4            |       |
| pwxlv1         | 52         | rfl           | 716.8              |       |
| pwx            | 14.300     | rfp           | 703.3              |       |
| jixh           | HSQC       | rfl1          | 4002.6             |       |
| nullflg        | y          | rfp1          | 2728.5             |       |
| mult           | 2          | PLOT          |                    |       |
|                |            | wc            | 150.0              |       |
|                |            | sc            | 6.2                |       |
|                |            | wc2           | 116.2              |       |
|                |            | sc2           | 0                  |       |
|                |            | vs            | 100                |       |
|                |            | th            | 4                  |       |
|                |            | ai            | cdc                | ph    |

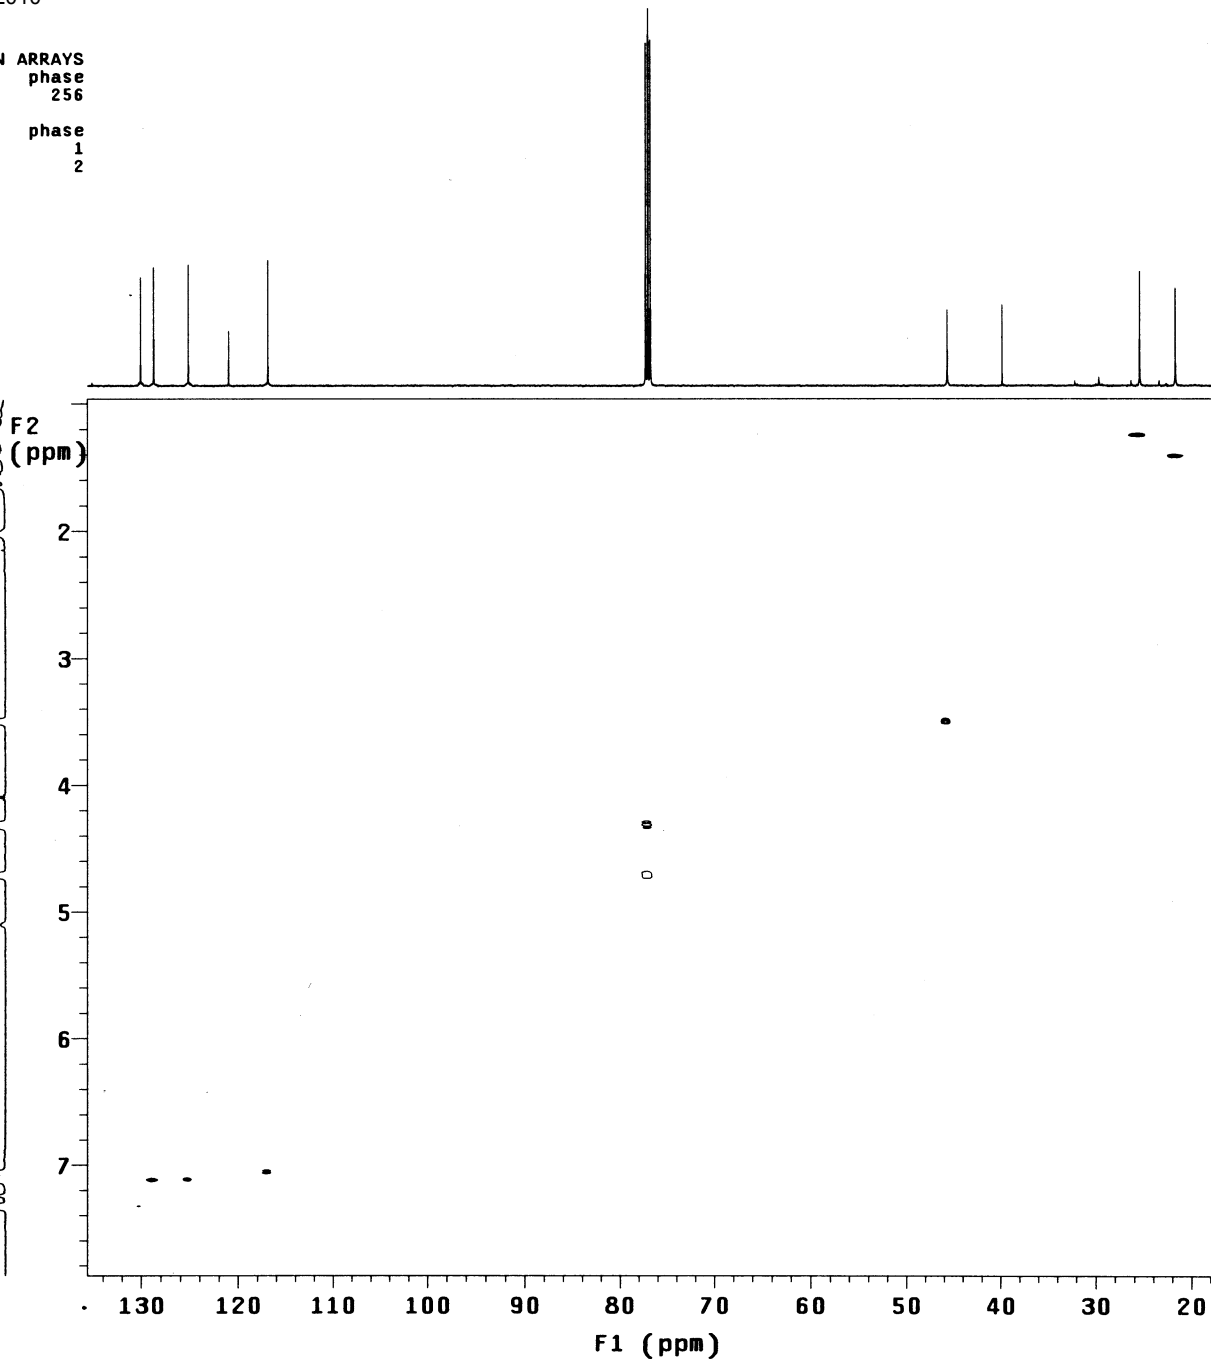

Fig S91. COSY of compound 3j

PMK-02-360 # Supplementary Material (ESI) for Organic & Biomolecular Chemistry  
 # This journal is (c) The Royal Society of Chemistry 2010  
 exp16 gCOSY

|                |            |               |          |
|----------------|------------|---------------|----------|
| date           | Apr 7 2010 | hs            | nn       |
| solvent        | cdcl3      | sspu1         | n        |
| sample         | undefined  | hsglv1        | 1003     |
| ACQUISITION    |            | SPECIAL       |          |
| sw             | 4490.3     | temp          | not used |
| at             | 0.228      | gain          | 28       |
| np             | 2048       | spin          | 0        |
| fb             | not used   | F2 PROCESSING |          |
| ss             | 16         | sb            | -0.114   |
| d1             | 1.000      | sbs           | not used |
| nt             | 8          | fn            | 2048     |
| 2D ACQUISITION |            | F1 PROCESSING |          |
| sw1            | 4490.3     | sb1           | -0.029   |
| ni             | 128        | sbs1          | not used |
| TRANSMITTER    |            | proc1         |          |
| tn             | H1         | fn1           | 2048     |
| sfrq           | 499.829    | DISPLAY       |          |
| tof            | -250.0     | sp            | 266.5    |
| tpwr           | 58         | wp            | 3543.2   |
| pw             | 11.100     | sp1           | 262.6    |
| GRADIENTS      |            | wp1           |          |
| gzlv11         | 1003       | rfl           | 717.4    |
| gt1            | 0.001000   | rfp           | 703.3    |
| gstab          | 0.000500   | rfl1          | 716.9    |
| DECOUPLER      |            | rfp1          |          |
| dn             | C13        | PLOT          |          |
| dm             | nnn        | wc            | 155.0    |
|                |            | sc            | 10.0     |
|                |            | wc2           | 155.0    |
|                |            | sc2           | 155.0    |
|                |            | vs            | 100      |
|                |            | th            | 4        |
|                |            | ai            | cdc av   |

F2 (ppm)

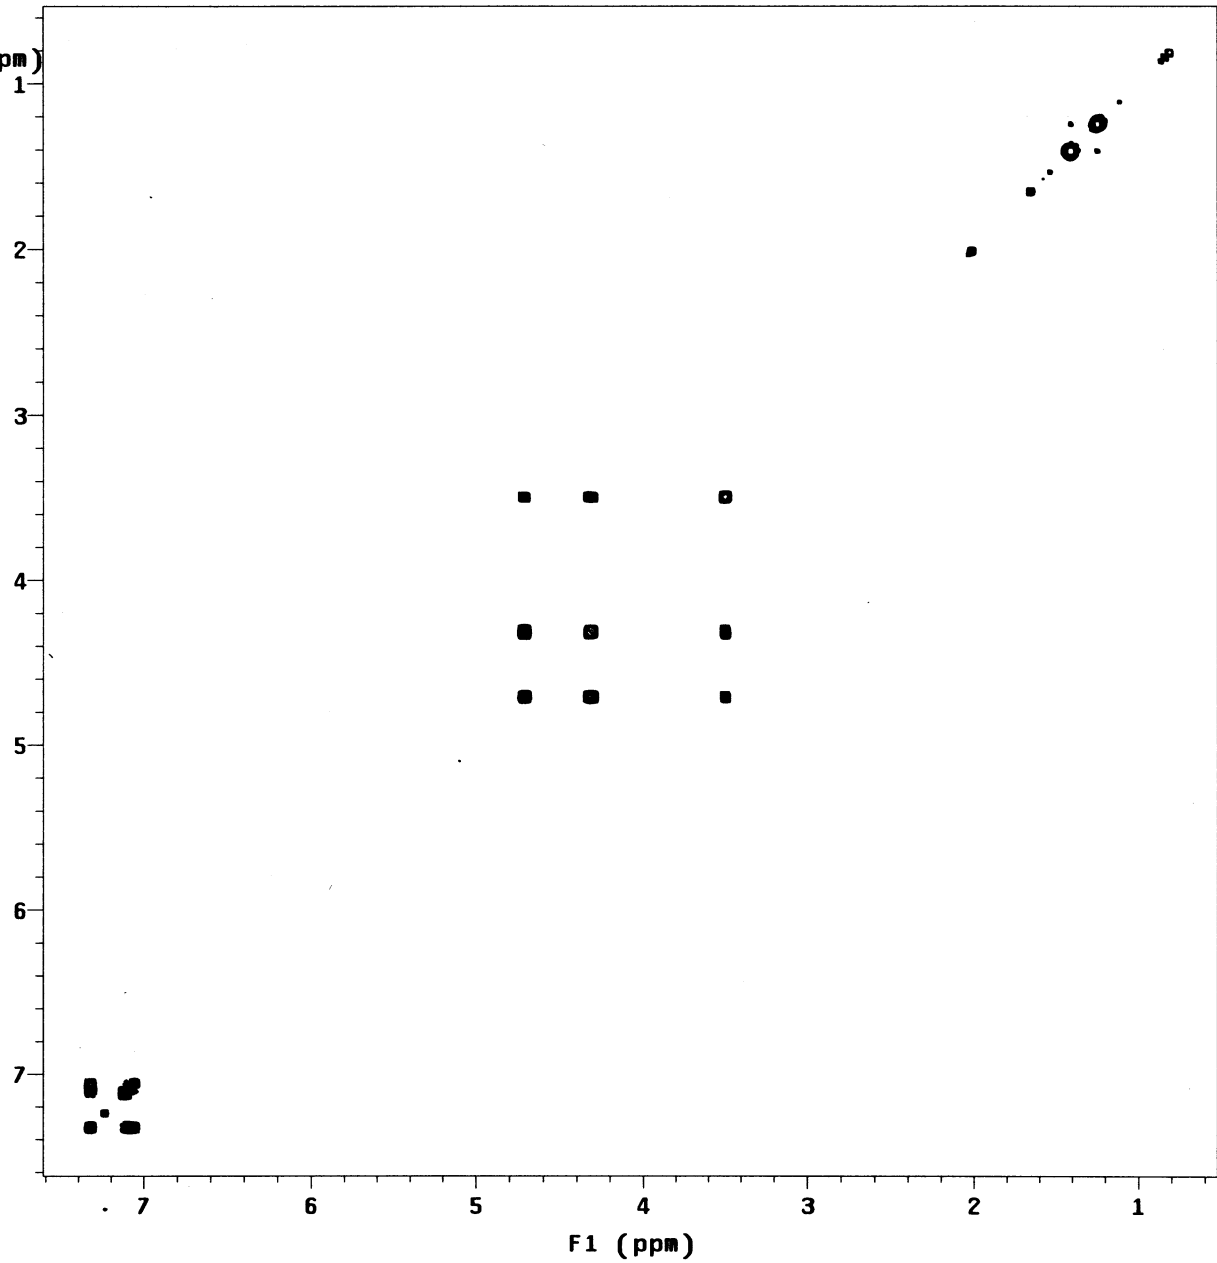

Fig S92. NOESY of compound 3j

# Supplementary Material (ESI) for Organic & Biomolecular Chemistry  
 This journal is (c) The Royal Society of Chemistry 2010

exp17 NOESY

| SAMPLE         |            | FLAGS         | n        |
|----------------|------------|---------------|----------|
| date           | Apr 7 2010 | hs            | y        |
| solvent        | cdc13      | sspul         | y        |
| sample         | undefined  | PFGflg        | y        |
| ACQUISITION    |            | hsglvi        | 1003     |
| sw             | 4490.3     | SPECIAL       |          |
| at             | 0.228      | temp          | not used |
| np             | 2048       | gain          | 28       |
| fb             | not used   | spin          | 0        |
| ss             | 32         | F2 PROCESSING |          |
| d1             | 1.000      | gf            | 0.105    |
| nt             | 8          | gfs           | not used |
| 2D ACQUISITION |            | fn            | 2048     |
| sw1            | 4490.3     | F1 PROCESSING |          |
| ni             | 200        | gf1           | 0.041    |
| TRANSMITTER    |            | gfs1          | not used |
| tn             | H1         | proci         | lp       |
| sfrq           | 499.829    | fni           | 2048     |
| tof            | -250.0     | DISPLAY       |          |
| tpwr           | 58         | sp            | 312.7    |
| pw             | 11.100     | wp            | 3499.3   |
| NOESY          |            | sp1           | 311.4    |
| mix            | 0.600      | wp1           | 3499.3   |
| PRESATURATION  |            | rfl           | 715.0    |
| satmode        | nnnn       | rfp           | 703.3    |
| satpwr         | 0          | rf11          | 716.3    |
| satdly         | 0          | rfp1          | 703.3    |
| satfrq         | 0          | PLOT          |          |
| DECOUPLER      |            | wc            | 155.0    |
| dn             | C13        | sc            | 10.0     |
| dm             | nnn        | wc2           | 155.0    |
|                |            | sc2           | 0        |
|                |            | vs            | 100      |
|                |            | th            | 1        |
|                |            | ai            | ph       |

F2 (ppm)

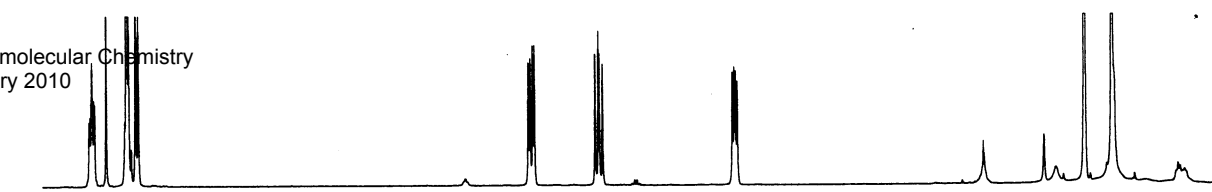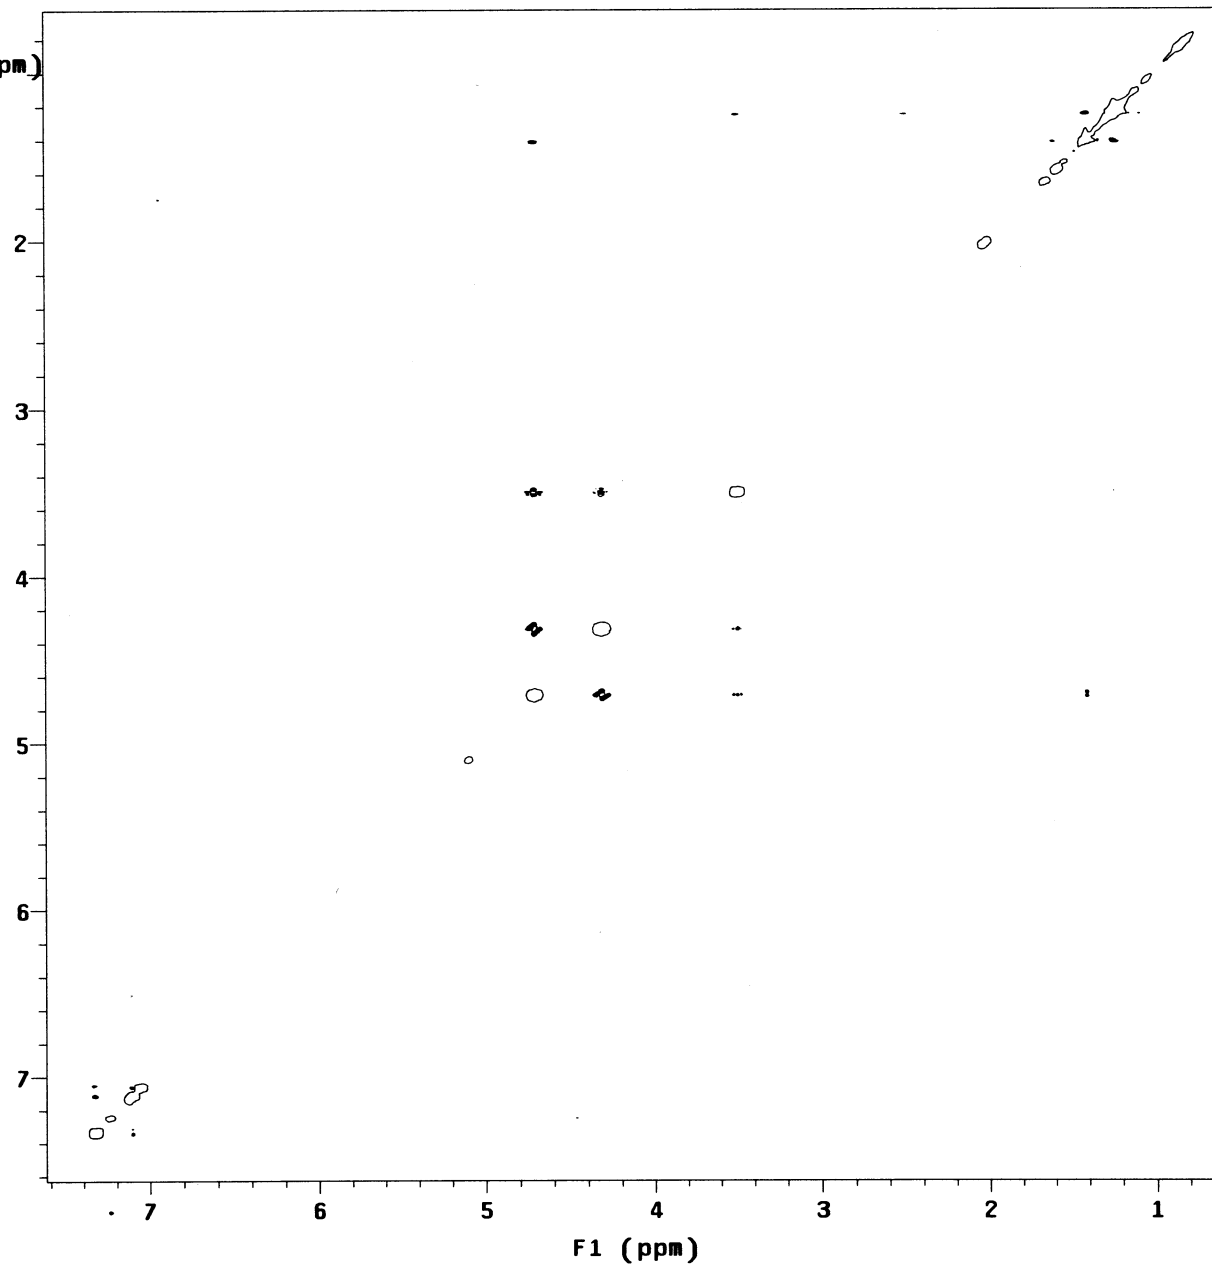

F1 (ppm)

Fig S93. 1H NMR (CDCl3, 500 MHz) of compound 3k

PMK-02-394

exp3 s2#0 Supplementary Material (ESI) for Organic & Biomolecular Chemistry  
 # This journal is (c) The Royal Society of Chemistry 2010  
 #1  
 SAMPLE DEC. 8 2010

```

date Aug 7 2010 dfrq 125.693
solvent cdc13 dn C13
file exp dpwr 30
ACQUISITION
sfrq 499.830 dm nnn
tn H1 dmm c
at 3.000 dmf 200
np 48000 dseq
sw 8000.0 dres 1.0
fb not used homo n
bs 4 temp 23.0
tpwr 58
pw 4.8 wtf
d1 1.000 proc ft
tof 499.7 fn not used
nt 4 math f
ct 4
alock y werr react
gain not used wexp procplot
FLAGS
il n wnt
in n
dp y
hs nn
DISPLAY
sp -250.1
wp 5498.0
vs 100
sc 0
wc 210
hzmm 26.18
is 274.36
rfl 4638.7
rfp 3618.7
th 4
ins 100.000
nm cdc ph
  
```

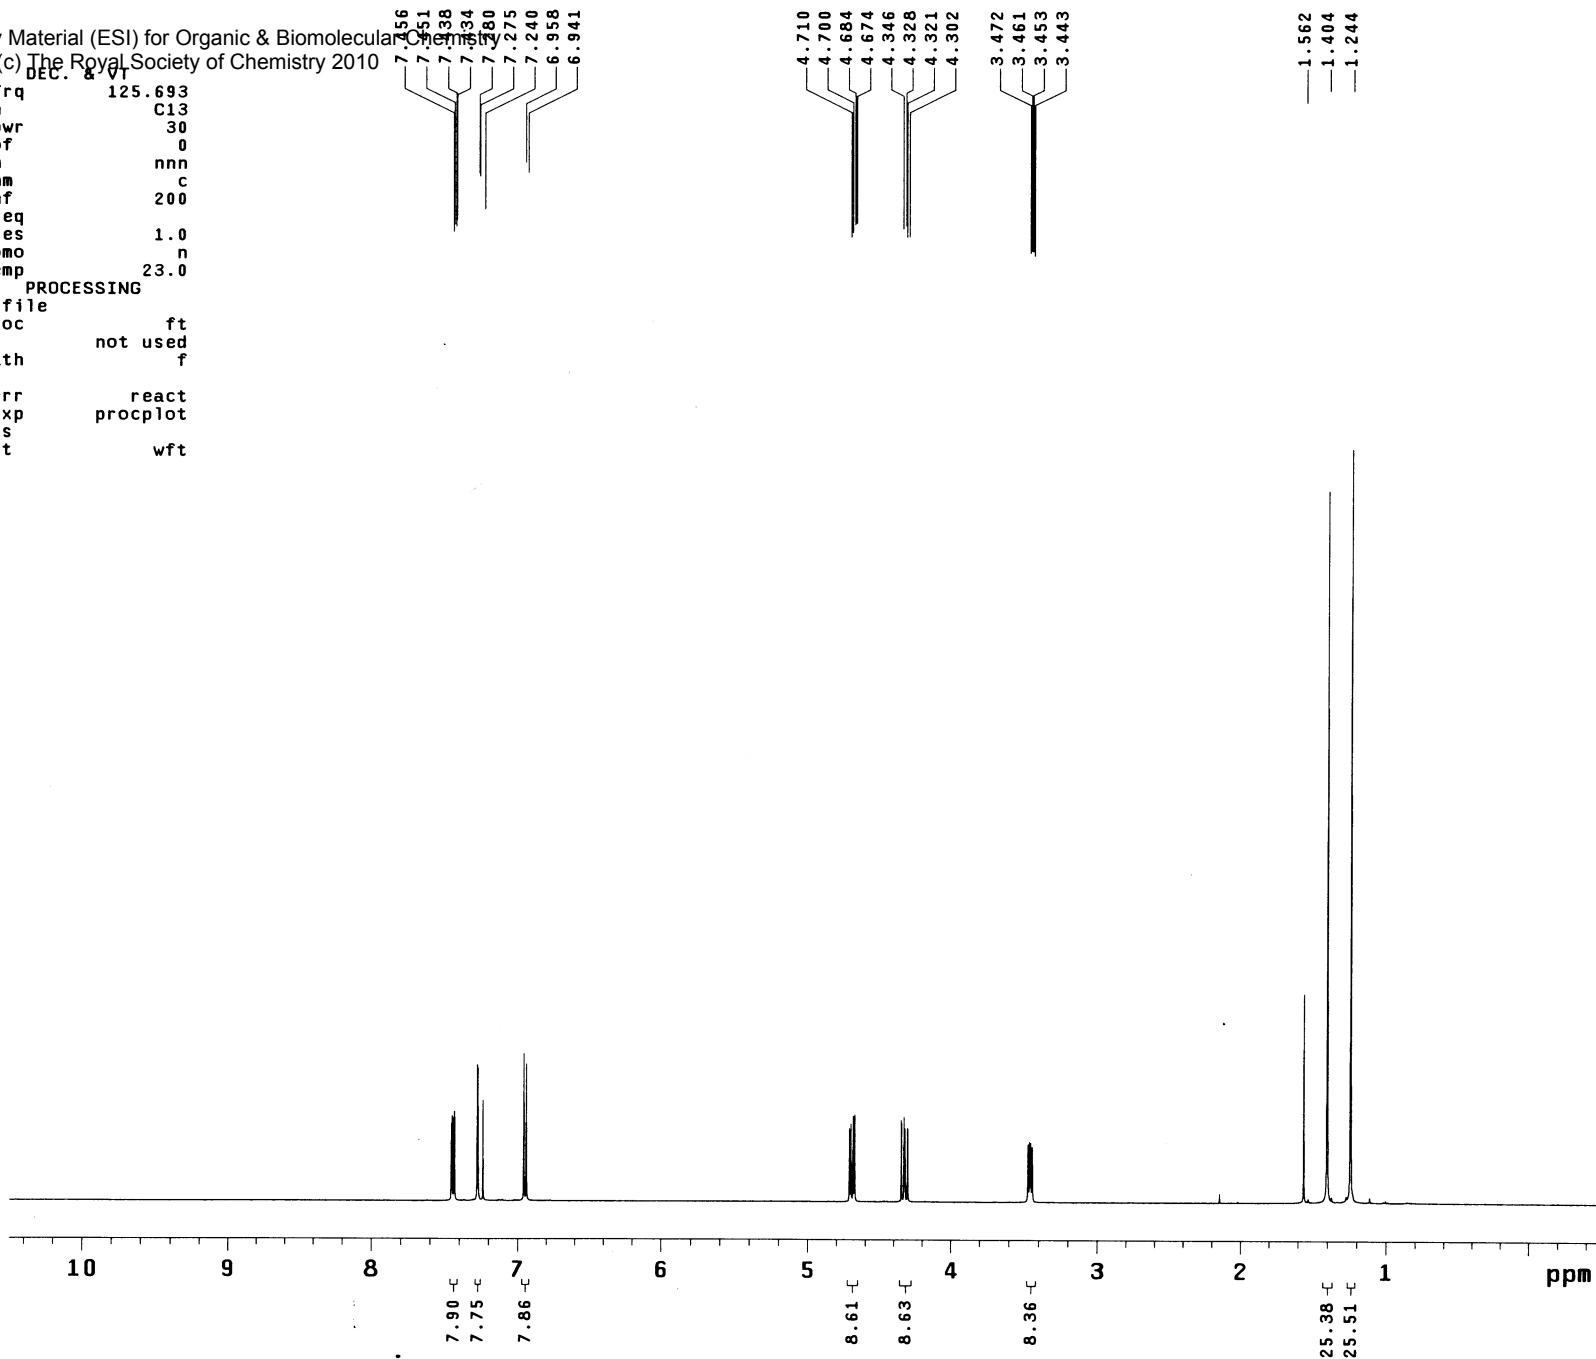

PMK-02-394

# Supplementary Material (ESI) for Organic & Biomolecular Chemistry

exp4 # This journal is (c) The Royal Society of Chemistry 2010

SAMPLE DEC. & VT  
date Aug 7 2010 dfrq 499.829  
solvent cdc13 dn H1  
file exp dpwr 39  
ACQUISITION dof 0  
sfrq 125.696 dm yyy  
tn C13 dmm w  
at 1.000 dmf 11905  
np 62894 dseq  
sw 31446.5 dres 1.0  
fb not used homo n  
bs 16 temp 23.0  
ss 2 PROCESSING  
tpwr 54 lb 1.00  
pw 4.0 wtfile  
d1 1.000 proc ft  
tof 2512.2 fn not used  
nt 2048 math f  
ct 2048  
alock y werr react  
gain not used wexp procplot  
FLAGS wbs testsn  
wnt  
il n  
in n  
dp y  
hs nn  
DISPLAY  
sp -1257.0  
wp 28906.3  
vs 200  
sc 0  
wc 210  
hzmm 137.65  
is 500.00  
rfl 10982.5  
rfp 9677.5  
th 10  
ins 100.000  
nm cdc ph

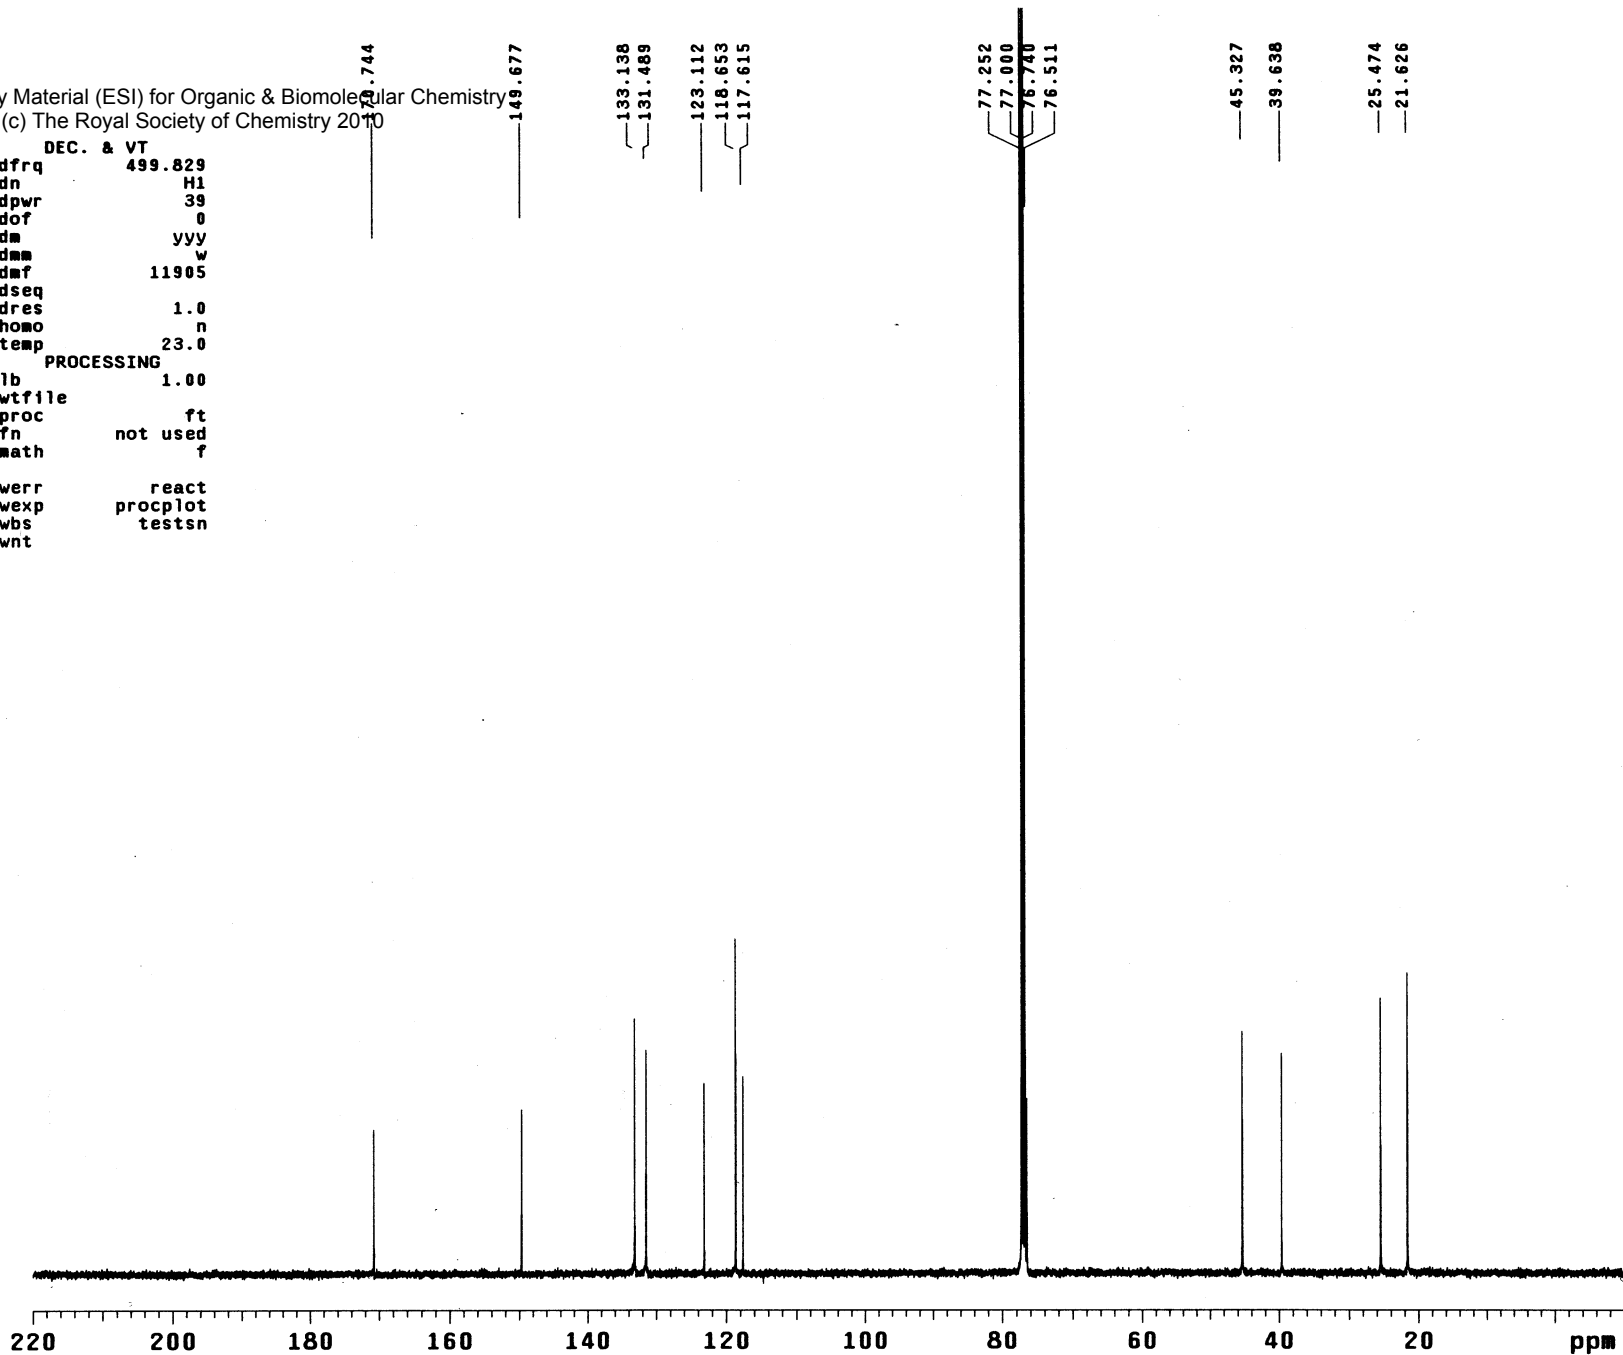

Fig S94. <sup>13</sup>C NMR (CDCl<sub>3</sub>, 125 MHz) of compound 3k

Fig S95. DEPT of compound 3k

PMK-02-293 Supplementary Material (ESI) for Organic & Biomolecular Chemistry  
 #7 This journal is (c) The Royal Society of Chemistry 2010

```

SAMPLE          DEPT      ACQUISITION ARRAYS
date Aug 7 2010 j1xh      140.0      array      mult
solvent cdc13      mult      arrayed    arraydim    3
sample undefined SPECIAL
ACQUISITION      temp      23.0      1          mult
sw 31446.5      gain      30        1          0.5
at 1.000        spin      0         2          1
np 62894        PROCESSING 3         3          1.5
bs 16          lb        1.00
ss -4          fn        not used
di 1.000      SPECTRUM
nt 2048      wp        28906.3
ct 2048      sp        -1257.0
TRANSMITTER      C13      lp        215.7
tn 2512.2      ai      cdc ph
tpwr 54        REFERENCE
pw 11.500     rfl      1305.0
DECOUPLER      H1      rfp      0
dn 0          wc        210
dof 39       sc        0
dm nny       vs        150
dmm ccw      hzmm     137.65
dmf 11905    th        68
pp1v1 51
pp 28.000
    
```

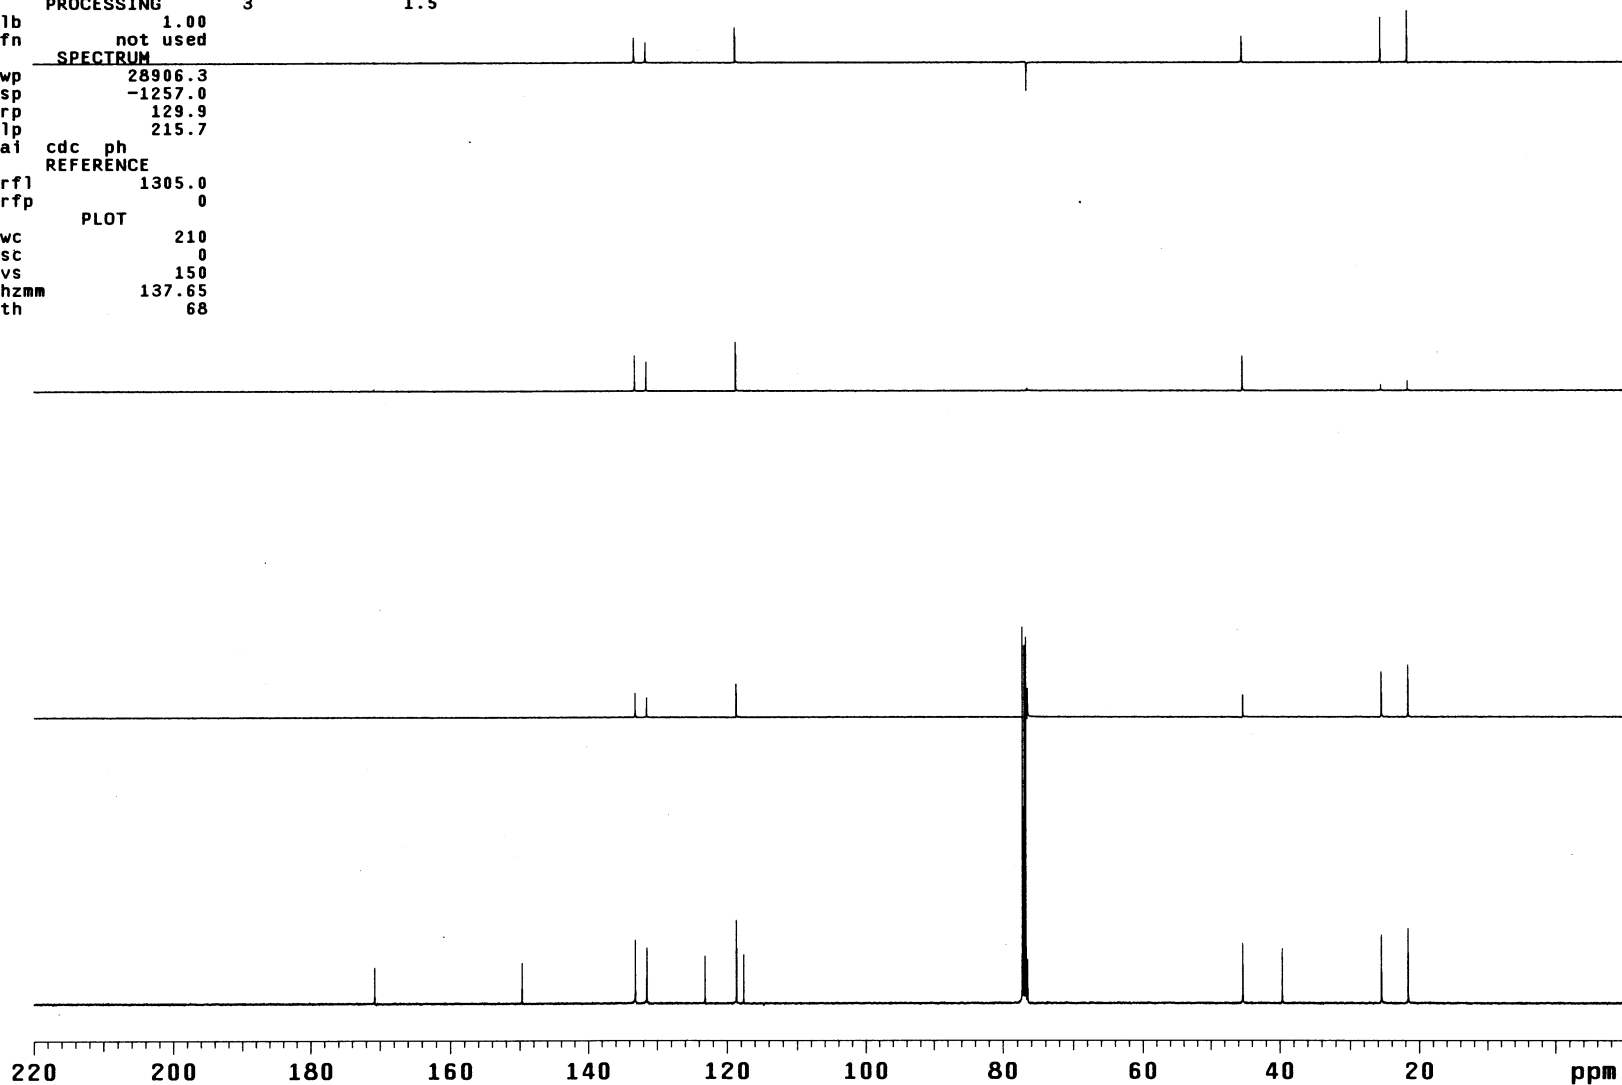

Fig S96. HSQC of compound 3k

PMK-02-394

exp8 gHSQC  
 # Supplementary Material (ESI) for Organic & Biomolecular Chemistry  
 This journal is (c) The Royal Society of Chemistry 2018

|                |            |         |          |          |       |
|----------------|------------|---------|----------|----------|-------|
| date           | Aug 7 2018 | hs      | n        | array    | phase |
| solvent        | cdc13      | sspul   | y        | arraydim | 256   |
| sample         | undefined  | PFGflg  | y        |          |       |
| ACQUISITION    |            |         |          |          |       |
| sw             | 4490.3     | hsglv1  | 1003     | 1        | phase |
| at             | 0.228      | SPECIAL |          | 1        | 1     |
| np             | 2048       | temp    | 23.0     | 2        | 2     |
| fb             | not used   | gain    | 20       |          |       |
| ss             | 32         | spin    | 0        |          |       |
| GRADIENTS      |            |         |          |          |       |
| d1             | 1.000      | gzlv11  | 1003     |          |       |
| nt             | 8          | gt1     | 0.002000 |          |       |
| 2D ACQUISITION |            |         |          |          |       |
| sw1            | 21367.5    | gzlv13  | 505      |          |       |
| ni             | 128        | gt3     | 0.001000 |          |       |
| phase          | arrayed    | gstab   | 0.000500 |          |       |
| F2 PROCESSING  |            |         |          |          |       |
| TRANSMITTER    |            |         |          |          |       |
| tn             | H1         | gf      | 0.105    |          |       |
| sfrq           | 499.829    | gfs     | not used |          |       |
| tof            | -250.0     | fn      | 2048     |          |       |
| F1 PROCESSING  |            |         |          |          |       |
| tpwr           | 58         | gf1     | 0.006    |          |       |
| pw             | 11.100     | gfs1    | not used |          |       |
| DECOUPLER      |            |         |          |          |       |
| dn             | C13        | procl   | lp       |          |       |
| dof            | -2515.2    | fn1     | 2048     |          |       |
| DISPLAY        |            |         |          |          |       |
| dm             | nny        | sp      | 230.9    |          |       |
| dmm            | ccp        | wp      | 3753.6   |          |       |
| dmf            | 32258      | sp1     | 1279.8   |          |       |
| dpwr           | 36         | wp1     | 18446.2  |          |       |
| pwxlvl         | 52         | rf1     | 2359.8   |          |       |
| pwxc           | 14.300     | rfp     | 2345.2   |          |       |
| HSQC           |            |         |          |          |       |
| j1xh           | 140.0      | rf11    | 10902.9  |          |       |
| nullflg        | y          | rfp1    | 9616.0   |          |       |
| PLOT           |            |         |          |          |       |
| mult           | 2          | wc      | 150.0    |          |       |
|                |            | sc      | 6.2      |          |       |
|                |            | wc2     | 116.2    |          |       |
|                |            | sc2     | 0        |          |       |
|                |            | vs      | 100      |          |       |
|                |            | th      | 4        |          |       |
|                |            | ai      | cdc ph   |          |       |

F2  
(ppm)

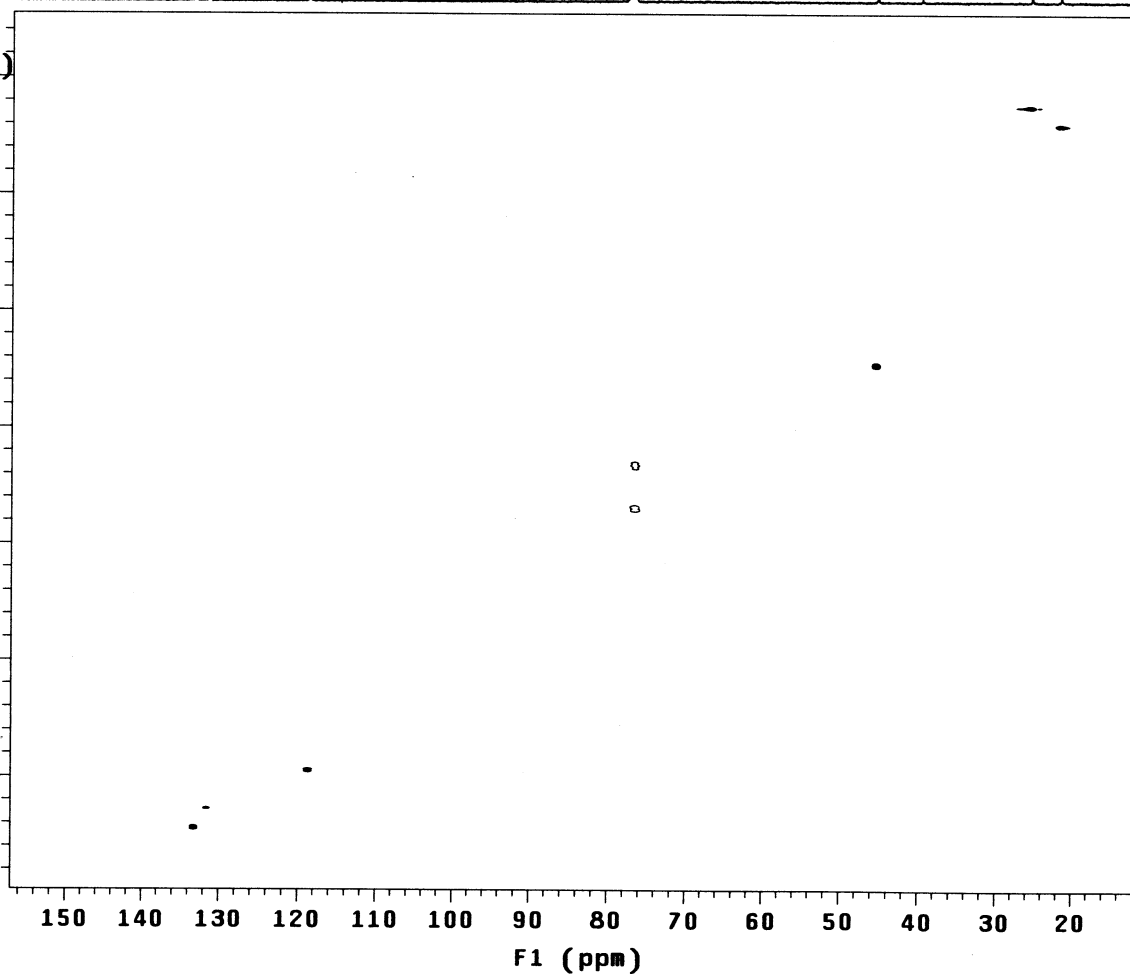



Fig S97. COSY of compound 3k

PMK-02-394

exp6 gCOSY# Supplementary Material (ESI) for Organic & Biomolecular Chemistry

# This journal is (c) The Royal Society of Chemistry 2010

|                |            |               |          |
|----------------|------------|---------------|----------|
| date           | Aug 7 2010 | hs            | nn       |
| solvent        | cdcl3      | sspul         | n        |
| sample         | undefined  | hsglv1        | 1003     |
| ACQUISITION    |            | SPECIAL       |          |
| sw             | 4490.3     | temp          | 23.0     |
| at             | 0.228      | gain          | 30       |
| np             | 2048       | spin          | 0        |
| fb             | not used   | F2 PROCESSING |          |
| ss             | 16         | sb            | -0.114   |
| dl             | 1.000      | sbs           | not used |
| nt             | 8          | fn            | 2048     |
| 2D ACQUISITION |            | F1 PROCESSING |          |
| sw1            | 4490.3     | sb1           | -0.029   |
| ni             | 128        | sbs1          | not used |
| TRANSMITTER    |            | procl         | lp       |
| tn             | H1         | fn1           | 2048     |
| sfrq           | 499.829    | DISPLAY       |          |
| tof            | -250.0     | sp            | 487.9    |
| tpwr           | 58         | wp            | 3341.4   |
| pw             | 11.100     | sp1           | 489.0    |
| GRADIENTS      |            | wp1           | 3345.8   |
| gzlv11         | 1003       | rfl           | 2361.6   |
| gt1            | 0.001000   | rfp           | 2345.2   |
| gstab          | 0.000500   | rfl1          | 2360.5   |
| DECOUPLER      |            | rfp1          | 2345.2   |
| dn             | C13        | PLOT          |          |
| dm             | nnn        | wc            | 155.0    |
|                |            | sc            | 10.0     |
|                |            | wc2           | 155.0    |
|                |            | sc2           | 0        |
|                |            | vs            | 100      |
|                |            | th            | 5        |
|                |            | ai            | cdc av   |

F2 (ppm)

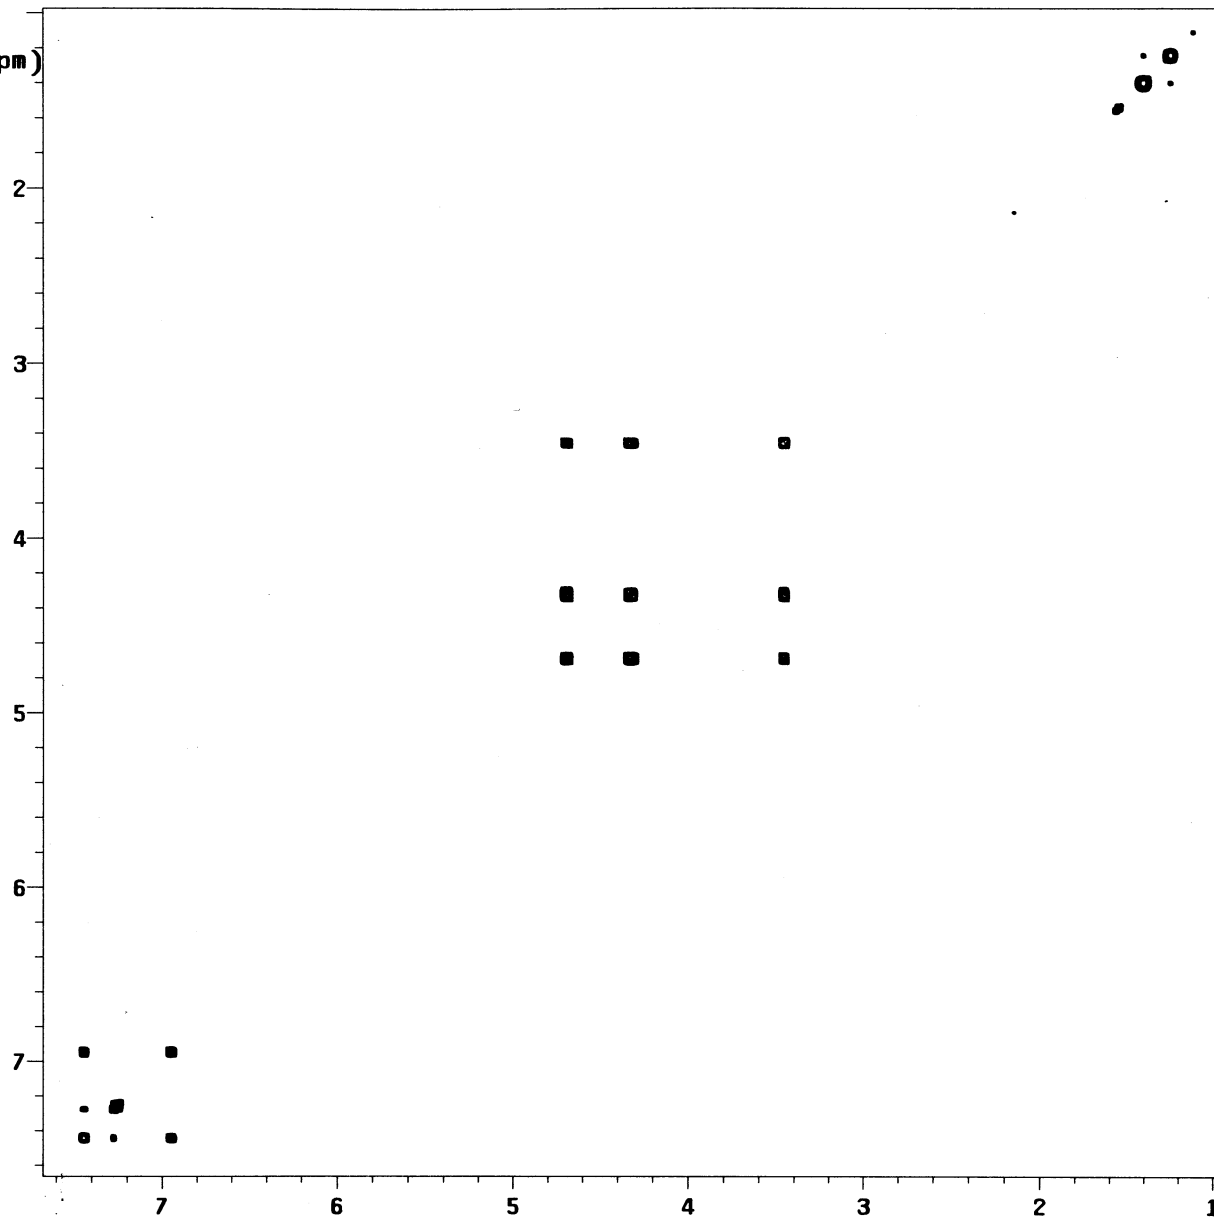

F1 (ppm)

Fig S98. NOESY of compound 3k

PMK-02-394

exp7 NOESY #Supplementary Material (ESI) for Organic & Biomolecular Chemistry

# This journal is (c) The Royal Society of Chemistry 2010

|                |             |               |            |         |      |
|----------------|-------------|---------------|------------|---------|------|
| SAMPLE         | ACQUISITION | DATE          | Aug 7 2010 | hs      | n    |
| SAMPLE         | ACQUISITION | solvent       | cdc13      | sspul   | y    |
| SAMPLE         | ACQUISITION | sample        | undefined  | PFGflg  | y    |
| SAMPLE         | ACQUISITION | ACQUISITION   | 4490.3     | hsglvt  | 1003 |
| sw             | 4490.3      | temp          | 23.0       | SPECIAL |      |
| at             | 0.228       | gain          | 30         |         |      |
| np             | 2048        | spin          | 0          |         |      |
| fb             | not used    | F2 PROCESSING |            |         |      |
| ss             | 32          | gf            | 0.105      |         |      |
| d1             | 1.000       | gfs           | not used   |         |      |
| nt             | 8           | fn            | 2048       |         |      |
| 2D ACQUISITION |             | F1 PROCESSING |            |         |      |
| sw1            | 4490.3      | gf1           | 0.041      |         |      |
| ni             | 200         | gfs1          | not used   |         |      |
| TRANSMITTER    |             | procl         | lp         |         |      |
| tn             | H1          | fn1           | 2048       |         |      |
| sfrq           | 499.829     | DISPLAY       |            |         |      |
| tof            | -250.0      | sp            | 472.2      |         |      |
| tpwr           | 58          | wp            | 3359.0     |         |      |
| pw             | 11.100      | sp1           | 473.0      |         |      |
| NOESY          |             | wp1           | 3354.6     |         |      |
| mix            | 0.600       | rfl           | 2359.7     |         |      |
| PRESATURATION  |             | rfl1          | 2358.9     |         |      |
| satmode        | nnnn        | rfl1          | 2345.2     |         |      |
| satpwr         | 0           | rfl1          | 2358.9     |         |      |
| satdly         | 0           | rfl1          | 2345.2     |         |      |
| satfrq         | 0           | PLOT          |            |         |      |
| DECOUPLER      |             | wc            | 155.0      |         |      |
| dn             | C13         | sc            | 10.0       |         |      |
| dm             | nnn         | wc2           | 155.0      |         |      |
|                |             | sc2           | 0          |         |      |
|                |             | vs            | 100        |         |      |
|                |             | th            | 1          |         |      |
|                |             | ai            | ph         |         |      |

F2 (ppm)

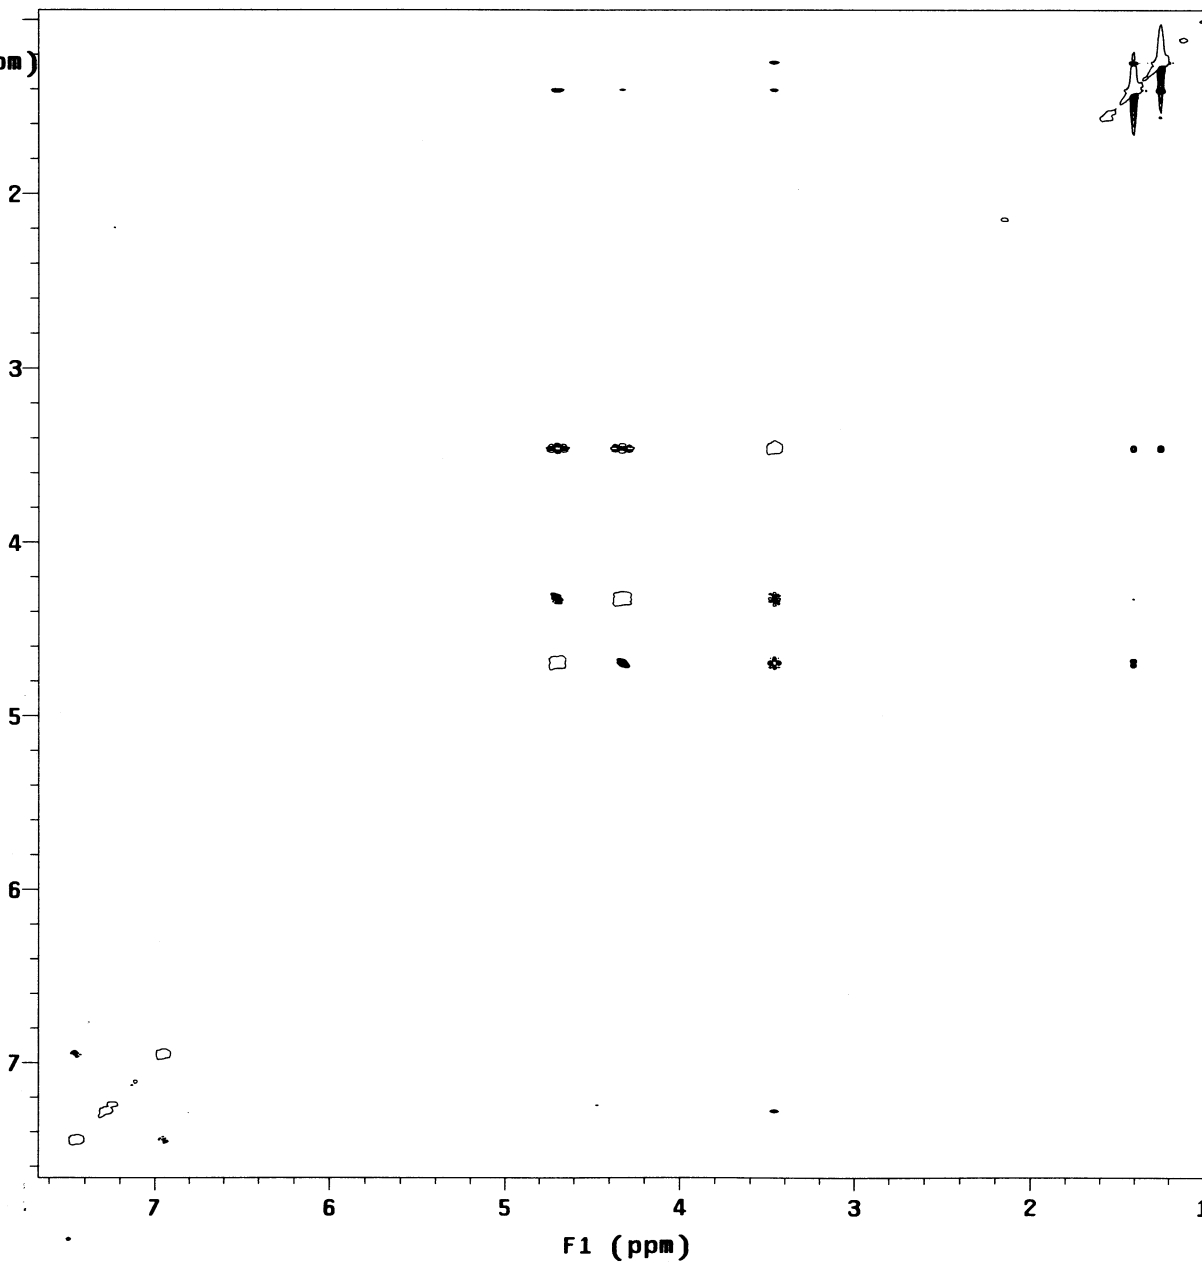

Fig S99. <sup>1</sup>H NMR (CDCl<sub>3</sub>, 500 MHz) of compound 3I

PMK-02-395

exp13 s2pu1

# Supplementary Material (ESI) for Organic & Biomolecular Chemistry  
 This journal is © The Royal Society of Chemistry 2010

date Aug 10 2010  
 solvent cdc13  
 file exp  
 ACQUISITION  
 sfrq 499.830  
 tn H1  
 at 3.000  
 np 48000  
 sw 8000.0  
 fb not used  
 bs 4  
 tpwr 58  
 pw 4.8  
 d1 1.000  
 tof 499.7  
 nt 4  
 ct 4  
 alock y  
 gain not used  
 FLAGS  
 il n  
 in n  
 dp y  
 hs nn  
 DISPLAY  
 sp -250.1  
 wp 5498.0  
 vs 100  
 sc 0  
 wc 210  
 hzmm 26.18  
 is 297.68  
 rfi 4638.4  
 rfp 3618.7  
 th 4  
 ins 100.000  
 nm cdc ph

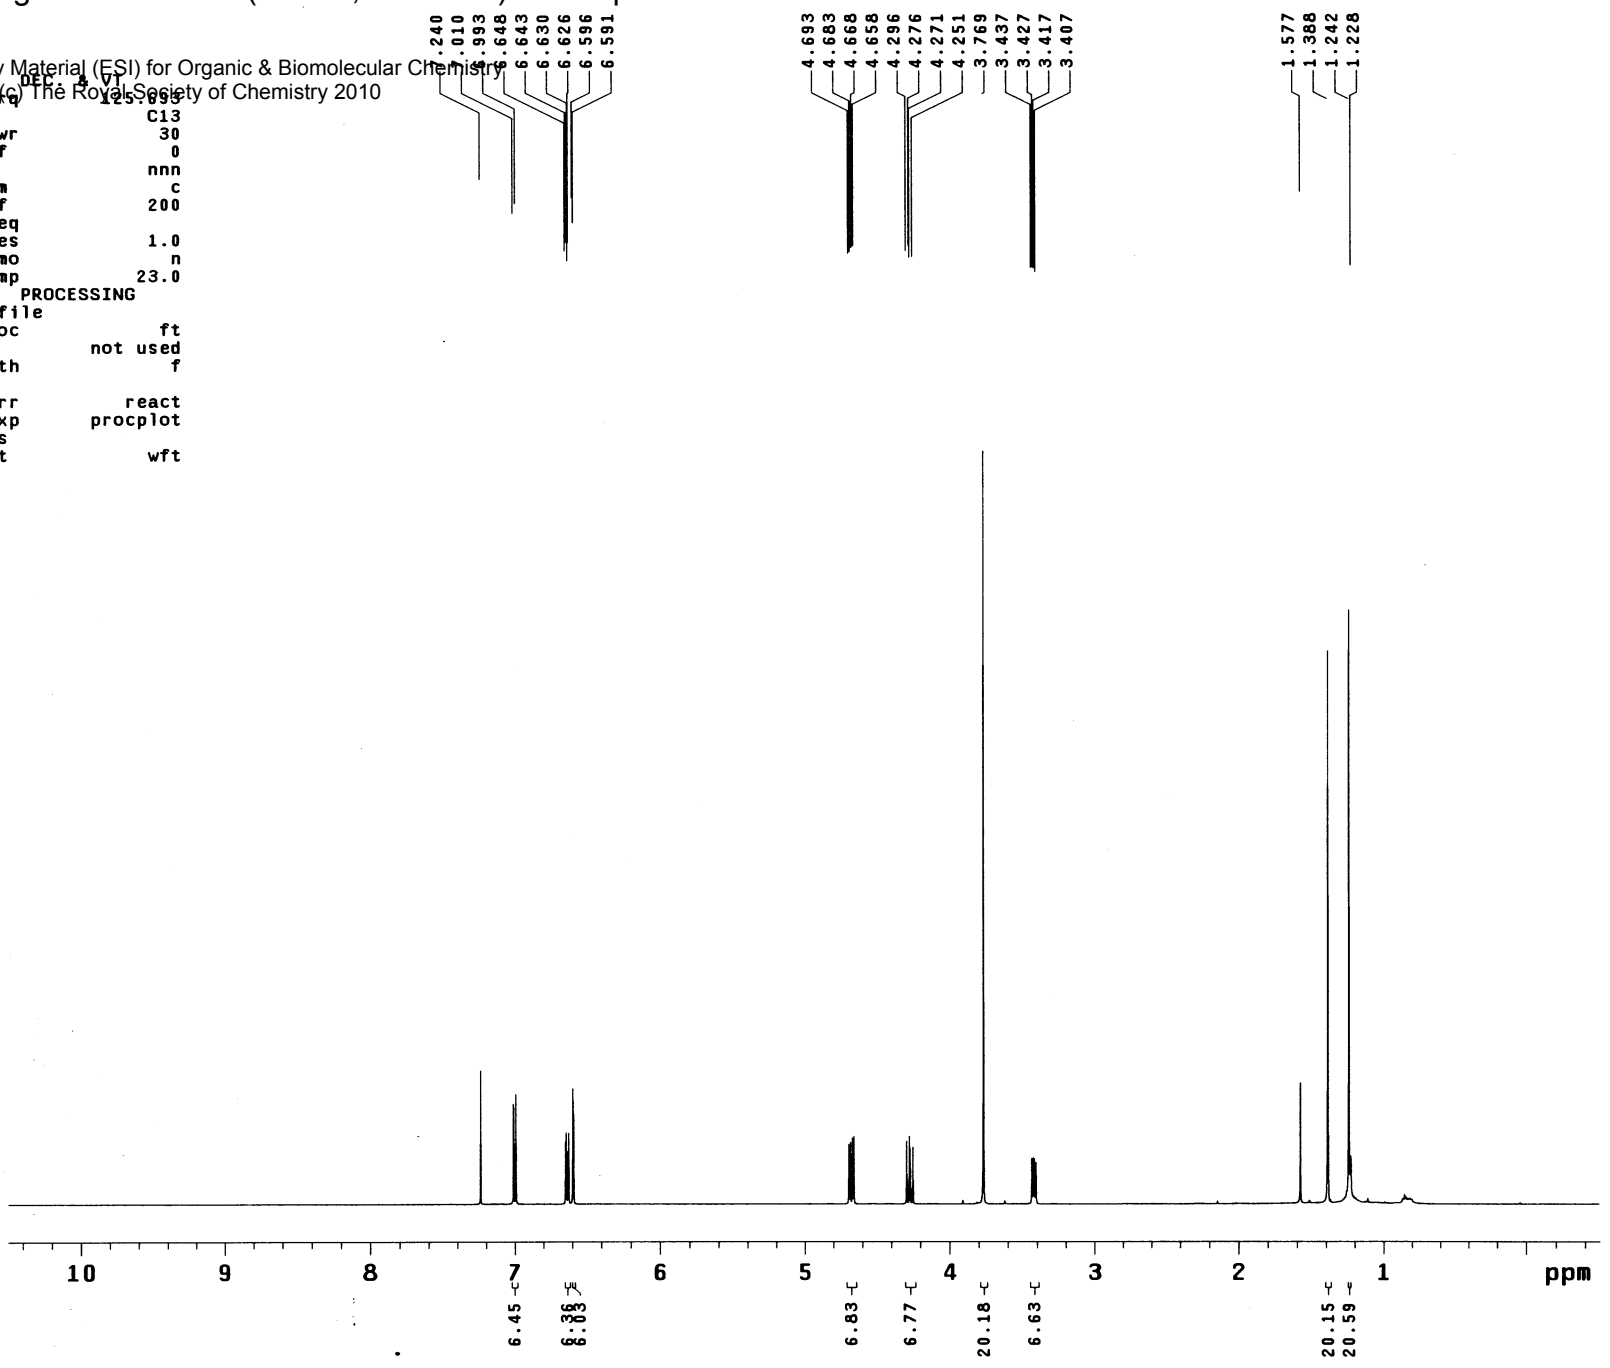

# C13 spectrum of Fig S100. 13C NMR (CDCl3, 100 MHz) of compound 3I

# Supplementary Material (ESI) for Organic & Biomolecular Chemistry  
 # This journal is (c) The Royal Society of Chemistry 2010

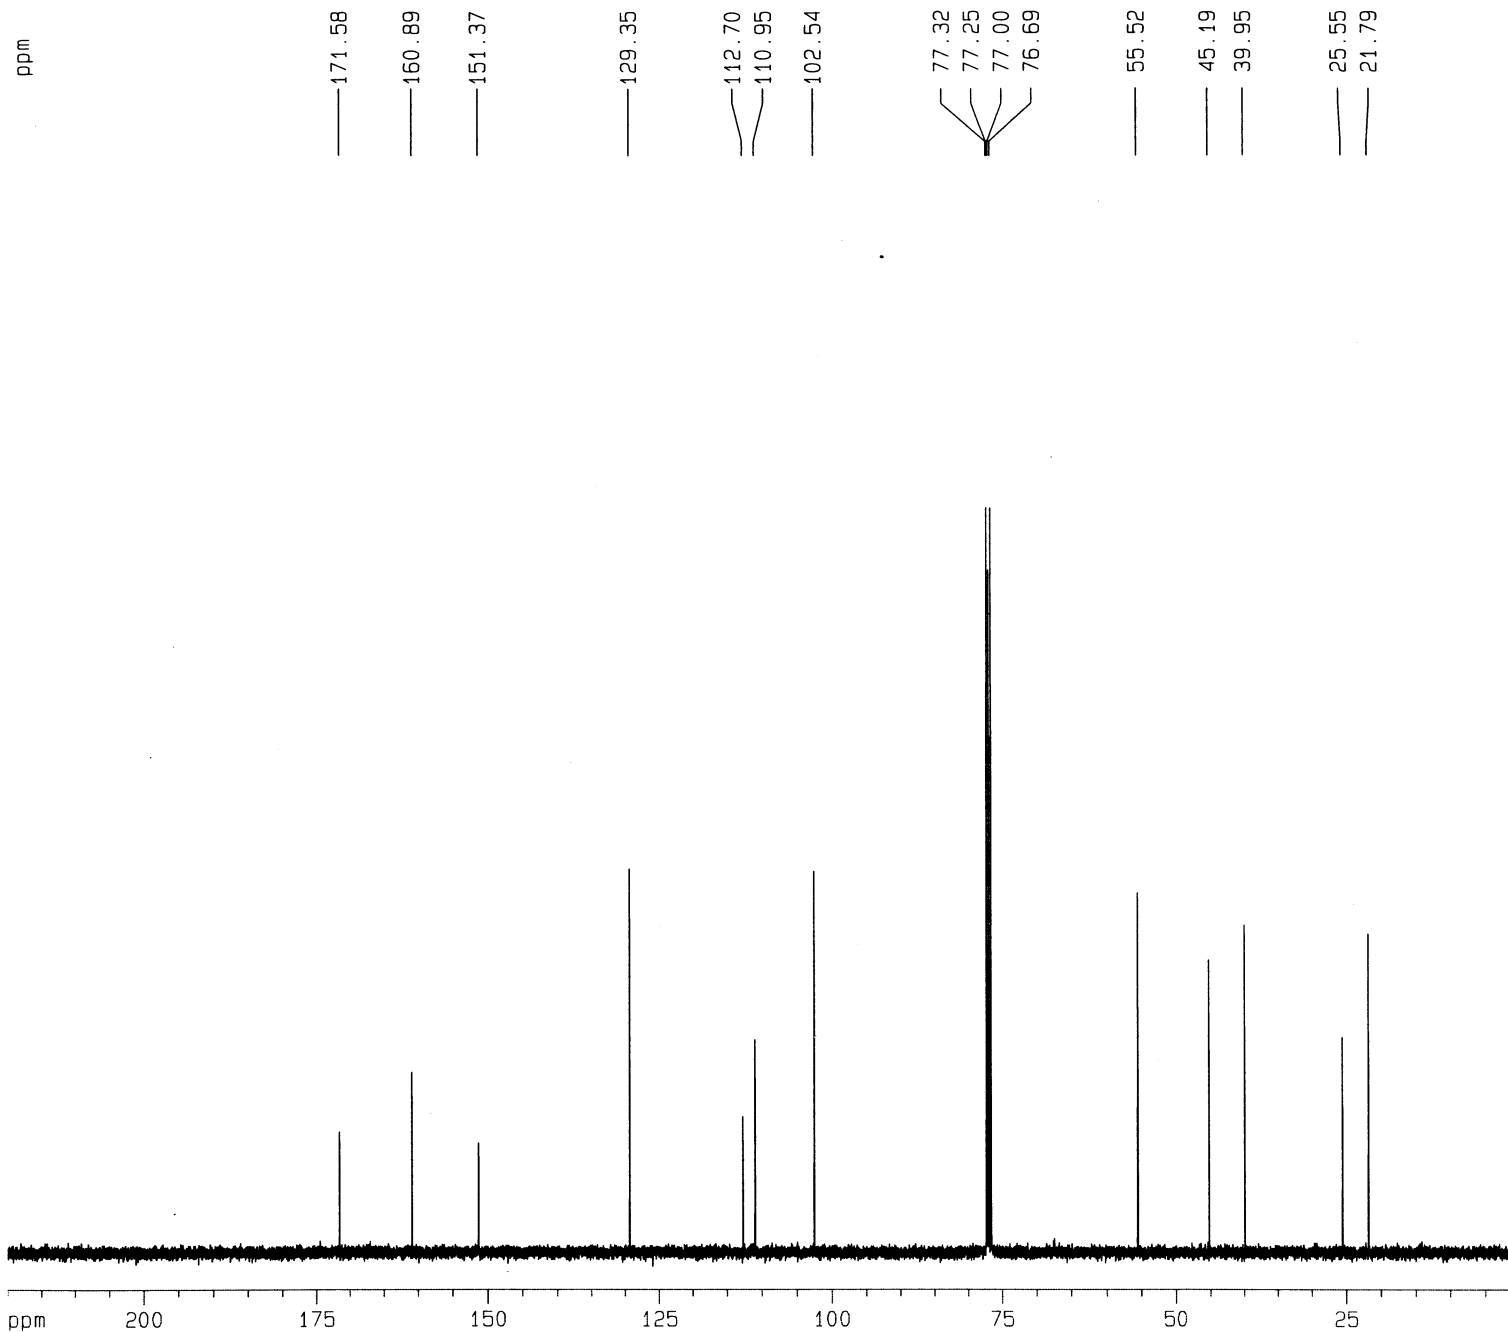

Current Data Parameters  
 NAME PMK-02-395  
 EXPNO 2  
 PROCNO 1

F2 - Acquisition Parameters  
 Date\_ 20100907  
 Time 12.51  
 INSTRUM spect  
 PROBHD 5 mm QNP 1H  
 PULPROG zgpg30  
 TD 65536  
 SOLVENT CDCl3  
 NS 512  
 DS 4  
 SWH 25125.629 Hz  
 FIDRES 0.383387 Hz  
 AQ 1.3042164 sec  
 RG 256  
 DW 19.900 usec  
 DE 6.50 usec  
 TE 300.0 K  
 D1 2.0000000 sec  
 d11 0.0300000 sec  
 d12 0.0002000 sec

===== CHANNEL f1 =====  
 NUC1 13C  
 P1 10.00 usec  
 PL1 0.00 dB  
 SF01 100.6237959 MHz

===== CHANNEL f2 =====  
 CPDPRG2 waltz16  
 NUC2 1H  
 PCPD2 90.00 usec  
 PL2 -3.00 dB  
 PL12 15.60 dB  
 PL13 18.60 dB  
 SF02 400.1326008 MHz

F2 - Processing parameters  
 SI 32768  
 SF 100.6127731 MHz  
 WDW EM  
 SSB 0  
 LB 0.30 Hz  
 GB 0  
 PC 1.40

1D NMR plot parameters  
 CX 20.00 cm  
 F1P 220.000 ppm  
 F1 22134.81 Hz  
 F2P 0.000 ppm  
 F2 0.00 Hz  
 PPMCM 11.00000 ppm/cm  
 HZCM 1106.74048 Hz/cm

Fig S101. DEPT of compound 3l

PMK-02-395

# Supplementary Material (ESI) for Organic & Biomolecular Chemistry

exp15 DEPT This journal is (c) The Royal Society of Chemistry 2010

|                  |              |                    |
|------------------|--------------|--------------------|
| SAMPLE           | DEPT         | ACQUISITION ARRAYS |
| date Aug 10 2010 | j1xh 140.0   | array mult         |
| solvent cdc13    | mult arrayed | arraydim 3         |
| sample undefined | SPECIAL      |                    |
| ACQUISITION      | temp 23.0    | 1 mult             |
| sw 31446.5       | gain 24      | 1 0.5              |
| at 1.000         | spin 0       | 2 1                |
| np 62894         | PROCESSING   | 3 1.5              |
| bs 16            | lb 1.00      |                    |
| ss -4            | fn not used  |                    |
| dl 1.000         | SPECTRUM     |                    |
| nt 512           | wp 28906.3   |                    |
| ct 512           | sp -1257.0   |                    |
| TRANSMITTER      | rp 122.7     |                    |
| tn C13           | lp 233.3     |                    |
| tof 2512.2       | ai cdc ph    |                    |
| tpwr 54          | REFERENCE    |                    |
| pw 11.500        | rfl 1305.0   |                    |
| DECOUPLER        | rff 0        |                    |
| dn H1            | PLOT         |                    |
| dof 0            | wc 210       |                    |
| dpwr 39          | sc 0         |                    |
| dm nny           | vs 200       |                    |
| dmm ccw          | hzmm 137.65  |                    |
| dmf 11905        | th 68        |                    |
| pp1v1 51         |              |                    |
| pp 28.000        |              |                    |

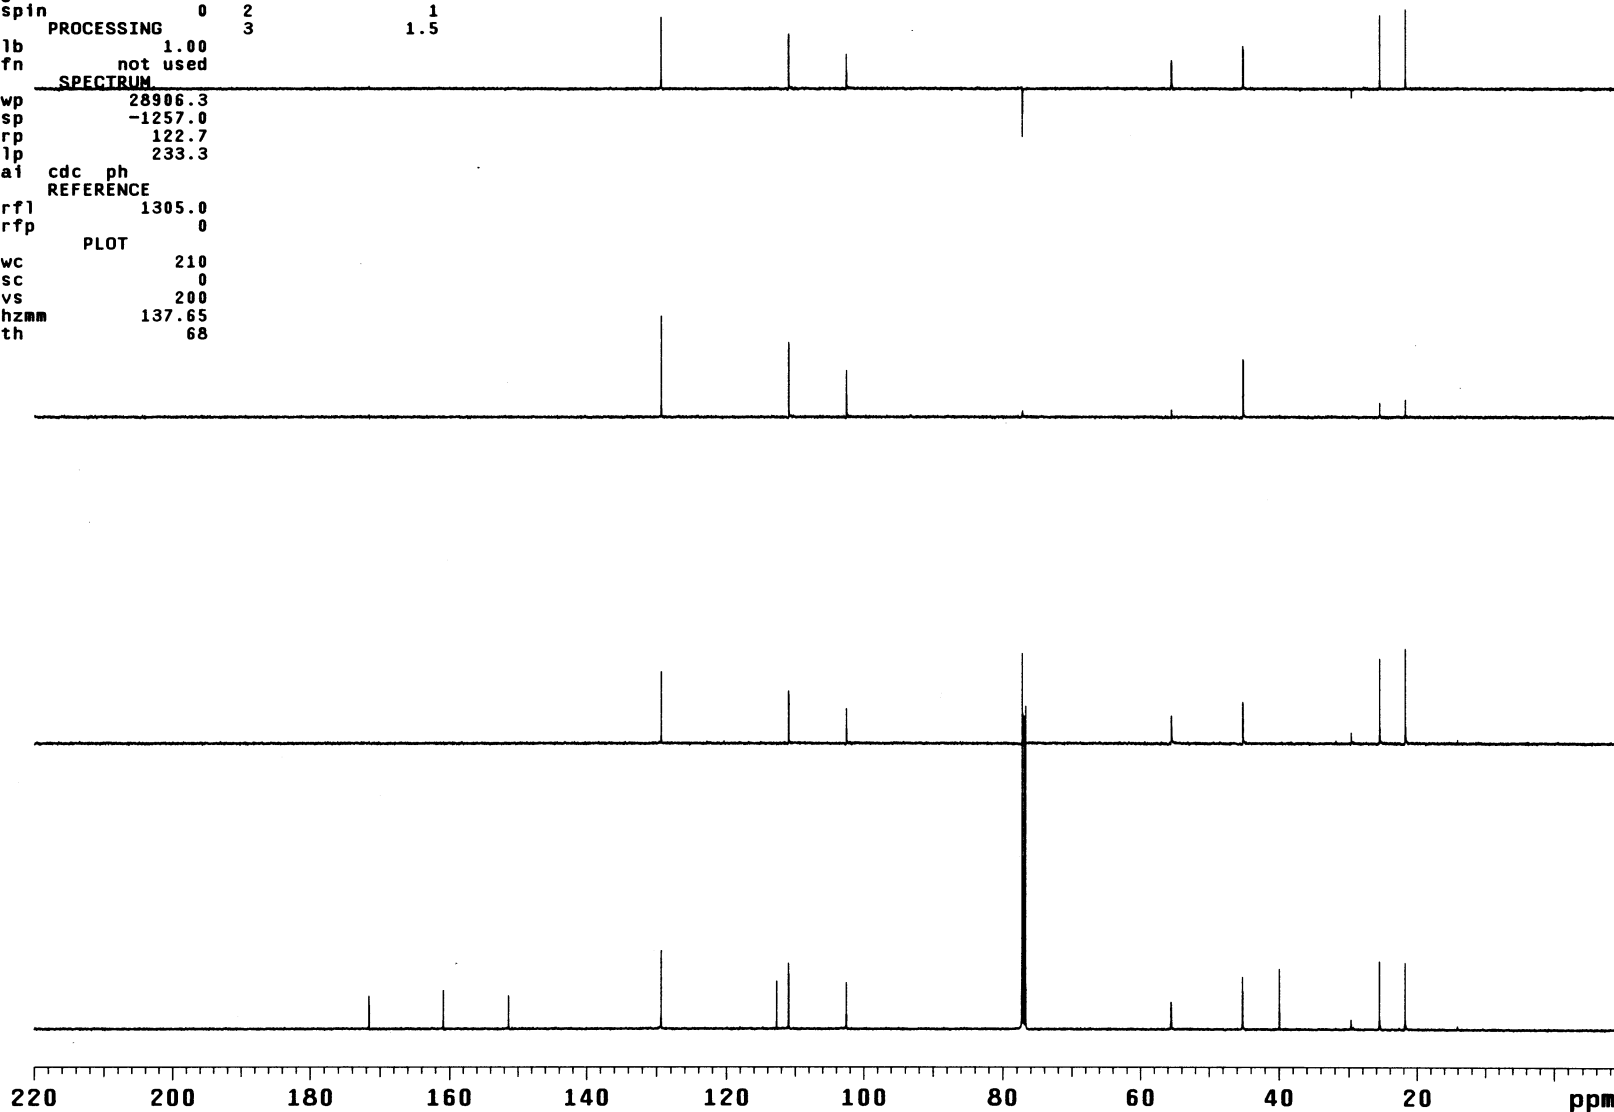

Fig S102. HSQC of compound 3l

PMK-02-395

exp18 gHSQC Supplementary Material (ESI) for Organic & Biomolecular Chemistry

# This journal is (c) The Royal Society of Chemistry 2010

|                |             |               |          |          |       |
|----------------|-------------|---------------|----------|----------|-------|
| date           | Aug 10 2010 | hs            | n        | array    | phase |
| solvent        | cdc13       | sspu1         | y        | arraydim | 256   |
| sample         | undefined   | PFGflg        | y        |          |       |
| ACQUISITION    |             | hsglv1        | 1003     | 1        | phase |
| sw             | 8000.0      | SPECIAL       |          | 1        | 1     |
| at             | 0.128       | temp          | 23.0     | 2        | 2     |
| np             | 2048        | gain          | 20       |          |       |
| fb             | not used    | spin          | 0        |          |       |
| ss             | 32          | GRADIENTS     |          |          |       |
| d1             | 1.000       | gzlv11        | 1003     |          |       |
| nt             | 8           | gt1           | 0.002000 |          |       |
| 2D ACQUISITION |             | gzlv13        | 505      |          |       |
| sw1            | 21367.5     | gt3           | 0.001000 |          |       |
| ni             | 128         | gstab         | 0.000500 |          |       |
| phase          | arrayed     | F2 PROCESSING |          |          |       |
| TRANSMITTER    |             | gf            | 0.059    |          |       |
| tn             | H1          | gfs           | not used |          |       |
| sfrq           | 499.830     | fn            | 2048     |          |       |
| tof            | 499.7       | F1 PROCESSING |          |          |       |
| tpwr           | 58          | gf1           | 0.006    |          |       |
| pw             | 11.100      | gfs1          | not used |          |       |
| DECOUPLER      |             | proc1         | 1p       |          |       |
| dn             | C13         | fn1           | 2048     |          |       |
| dof            | -2515.2     | DISPLAY       |          |          |       |
| dm             | nny         | sp            | 96.9     |          |       |
| dmm            | ccp         | wp            | 3882.8   |          |       |
| dmf            | 32258       | sp1           | 1186.9   |          |       |
| dpwr           | 36          | wp1           | 16401.2  |          |       |
| pwxlvl         | 52          | rfl           | 3156.6   |          |       |
| pw             | 14.300      | rfp           | 2136.3   |          |       |
| HSQC           |             | rfl1          | 11005.4  |          |       |
| j1xh           | 140.0       | rfp1          | 9709.2   |          |       |
| nullflg        | y           | PLOT          |          |          |       |
| mult           | 2           | wc            | 150.0    |          |       |
|                |             | sc            | 6.2      |          |       |
|                |             | wc2           | 116.2    |          |       |
|                |             | sc2           | 0        |          |       |
|                |             | vs            | 100      |          |       |
|                |             | th            | 4        |          |       |
|                |             | ai            | cdc      | ph       |       |

F2 (ppm)

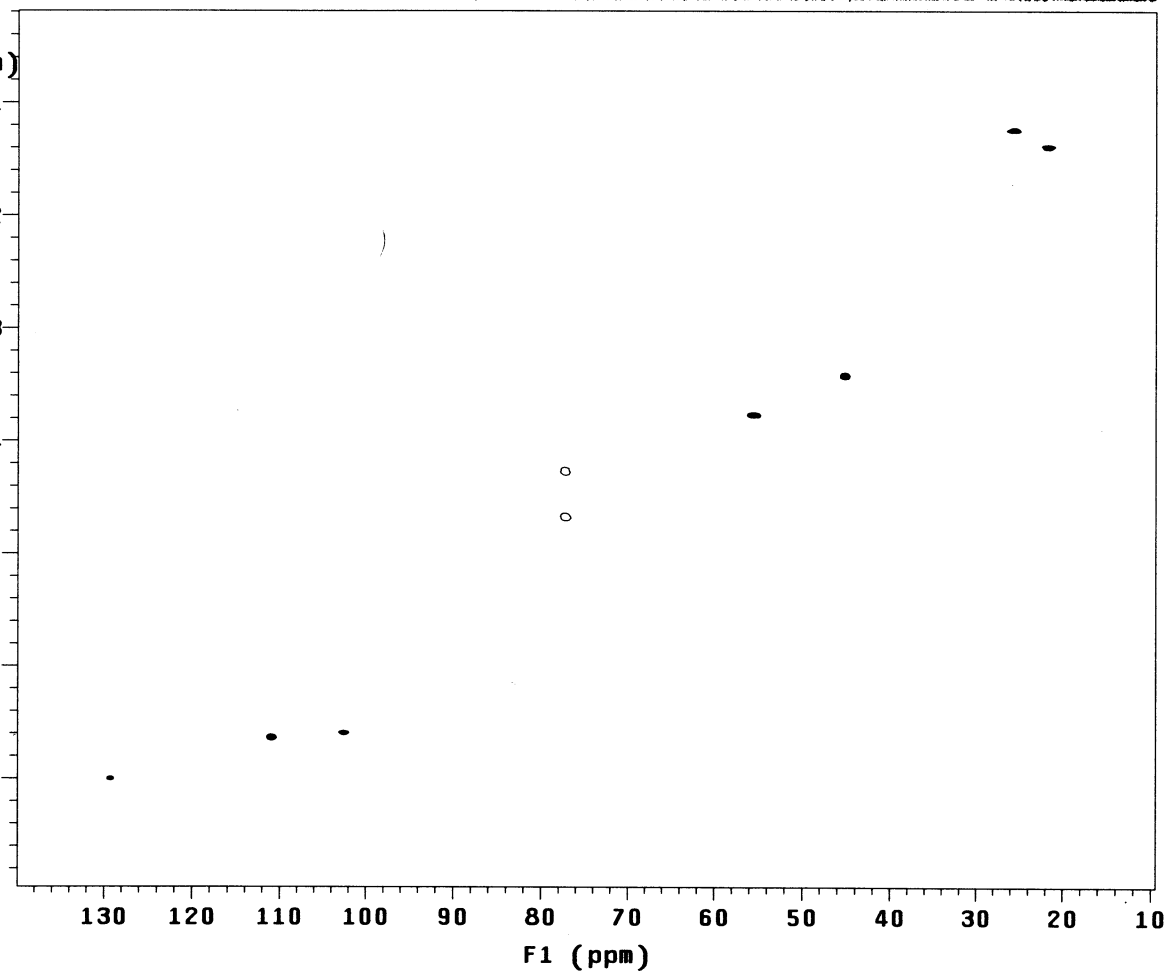

Fig S103. COSY of compound 3l

# Supplementary Material (ESI) for Organic & Biomolecular Chemistry  
 # This journal is (c) The Royal Society of Chemistry 2010  
 PMK-02-395  
 exp16 gCOSY

| SAMPLE         |             | FLAGS         |          |
|----------------|-------------|---------------|----------|
| date           | Aug 10 2010 | hs            | nn       |
| solvent        | cdcl3       | sspul         | n        |
| sample         | undefined   | hsglv1        | 1003     |
| ACQUISITION    |             | SPECIAL       |          |
| sw             | 4001.6      | temp          | 23.0     |
| at             | 0.128       | gain          | 24       |
| np             | 1024        | Spin          | 0        |
| fb             | not used    | F2 PROCESSING |          |
| ss             | 16          | sb            | -0.064   |
| d1             | 1.000       | sbs           | not used |
| nt             | 8           | fn            | 1024     |
| 2D ACQUISITION |             | F1 PROCESSING |          |
| sw1            | 4001.6      | sb1           | -0.032   |
| ni             | 128         | sbs1          | not used |
| TRANSMITTER    |             | proc1         |          |
| tn             | H1          | fn1           | 1024     |
| sfrq           | 499.829     | DISPLAY       |          |
| tof            | -499.9      | sp            | 323.4    |
| tpwr           | 58          | wp            | 3399.8   |
| pw             | 11.100      | sp1           | 331.6    |
| GRADIENTS      |             | wp1           | 3392.0   |
| gzlv11         | 1003        | rfl           | 2156.8   |
| gt1            | 0.001000    | rfp           | 2136.3   |
| gstab          | 0.000500    | rfl1          | 2156.4   |
| DECOUPLER      |             | rfp1          | 2136.3   |
| dn             | C13         | PLOT          |          |
| dm             | nnn         | wc            | 155.0    |
|                |             | sc            | 10.0     |
|                |             | wc2           | 155.0    |
|                |             | sc2           | 0        |
|                |             | vs            | 100      |
|                |             | th            | 8        |
|                |             | al            | cdc av   |

F2 (ppm)

2

3

4

5

6

7

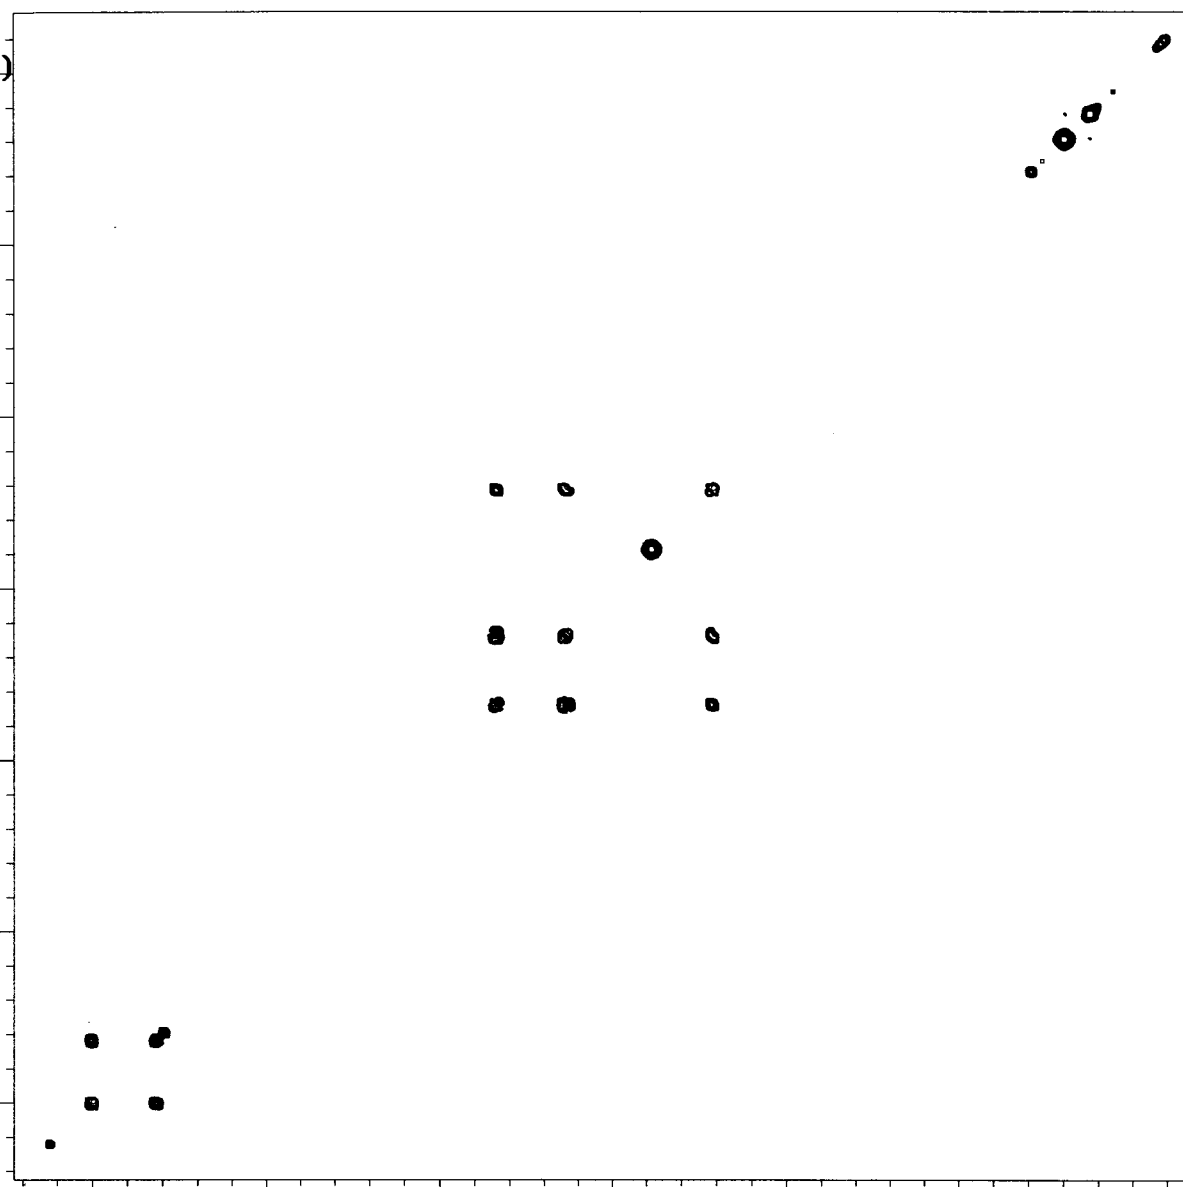

F1 (ppm)

Fig S104. NOESY of compound 3l

PMK-02-395 Supplementary Material (ESI) for Organic & Biomolecular Chemistry  
 exp17 NOESY journal is (c) The Royal Society of Chemistry 2010

|                |             |               |          |
|----------------|-------------|---------------|----------|
| SAMPLE         |             | FLAGS         |          |
| date           | Aug 10 2010 | hs            | n        |
| solvent        | cdc13       | sspu1         | y        |
| sample         | undefined   | PFGflg        | y        |
| ACQUISITION    |             | hsglvi        | 1003     |
| sw             | 4001.6      | SPECIAL       |          |
| at             | 0.128       | temp          | 23.0     |
| np             | 1024        | gain          | 24       |
| fb             | not used    | spin          | 0        |
| ss             | 32          | F2 PROCESSING |          |
| d1             | 1.000       | gf            | 0.050    |
| nt             | 8           | gfs           | not used |
| 2D ACQUISITION |             | fn            | 1024     |
| sw1            | 4001.6      | F1 PROCESSING |          |
| ni             | 200         | gf1           | 0.046    |
| TRANSMITTER    |             | gfs1          | not used |
| tn             | H1          | procl         | lp       |
| sfrq           | 499.829     | fn1           | 1024     |
| tof            | -499.9      | DISPLAY       |          |
| tpwr           | 58          | sp            | 307.5    |
| pw             | 11.100      | wp            | 3384.2   |
| NOESY          |             | sp1           | 292.5    |
| mix            | 0.600       | wp1           | 3392.0   |
| PRESATURATION  |             | rfl           | 2157.0   |
| satmode        | nnnn        | rfp           | 2136.3   |
| satpwr         | 0           | rfl1          | 2156.4   |
| satdly         | 0           | rfp1          | 2136.3   |
| satfrq         | 0           | PLOT          |          |
| DECOUPLER      |             | wc            | 155.0    |
| dn             | C13         | sc            | 10.0     |
| dm             | nnn         | wc2           | 155.0    |
|                |             | sc2           | 0        |
|                |             | vs            | 100      |
|                |             | th            | 1        |
|                |             | ai            | ph       |

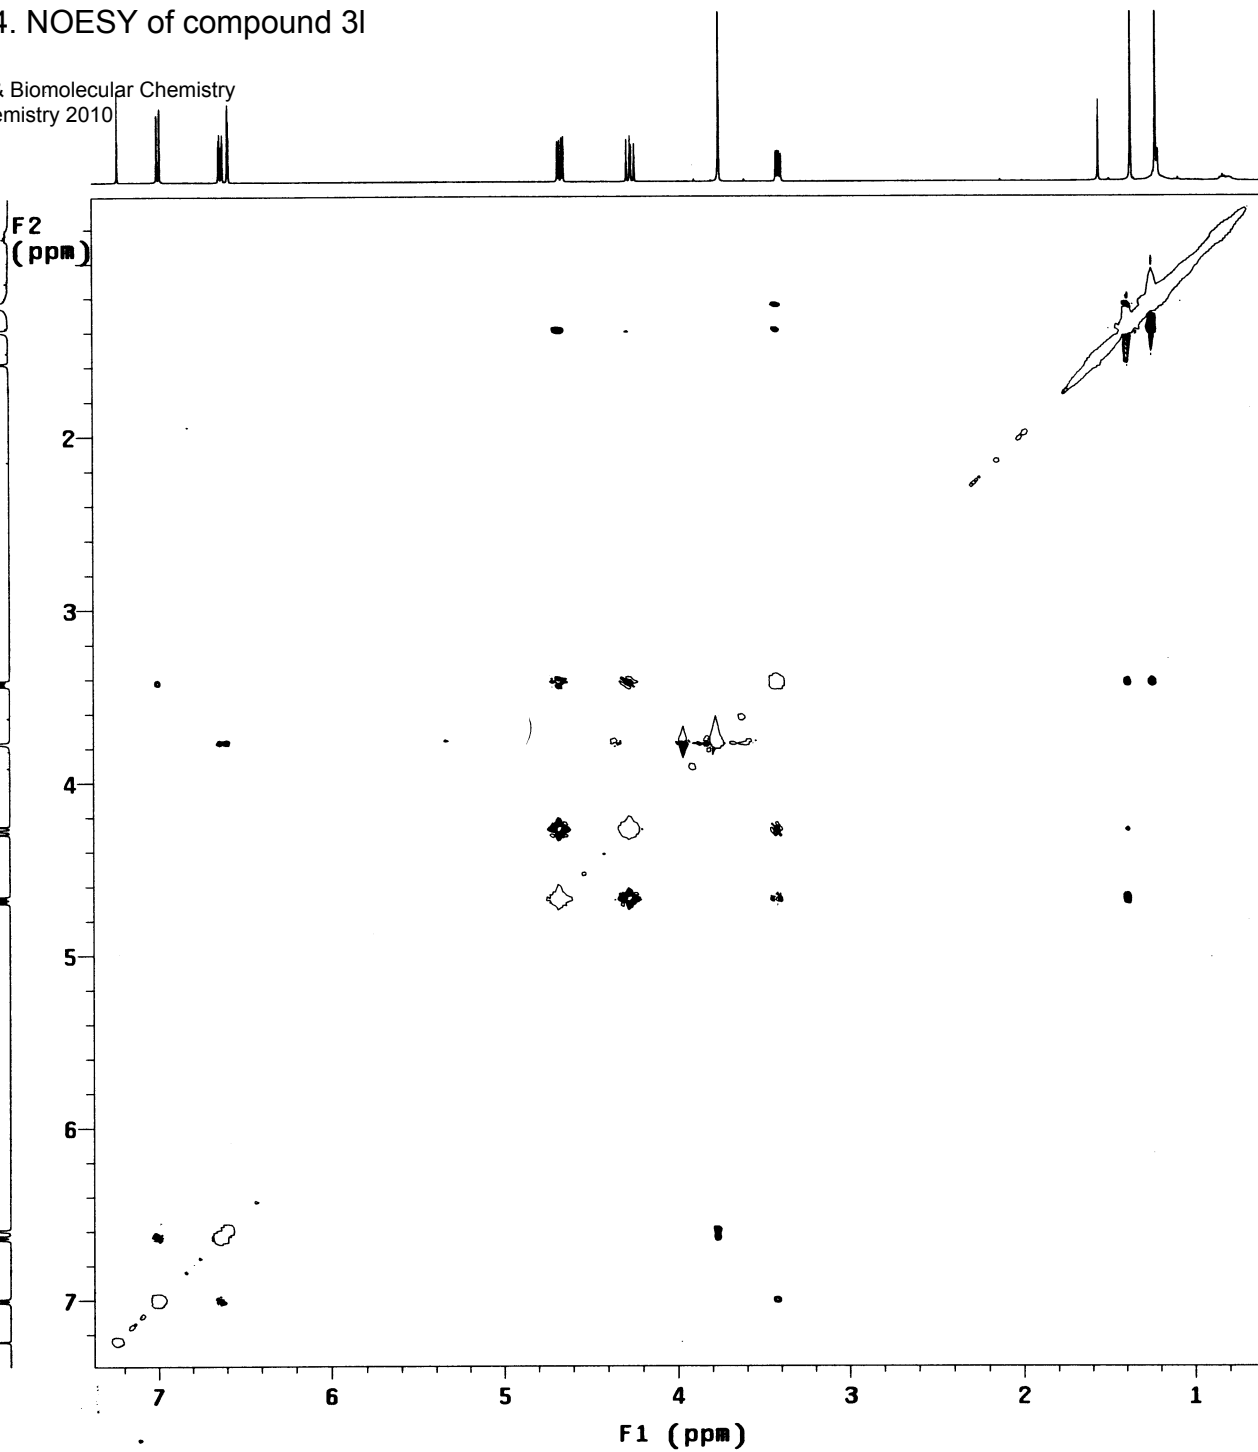



Fig S105. <sup>1</sup>H NMR (acetone-d<sub>6</sub>, 500 MHz) of compound 3m

# Supplementary Material (ESI) for Organic & Biomolecular Chemistry

PMK-02-393-ox idized (c) The Royal Society of Chemistry 2010

exp33 s2pul

```

SAMPLE          DEC. & VT
date    Aug 10 2010  dfrq    125.694
solvent  Acetone      dn      C13
file    /export/home/~ dpwr    30
vnmr1/vnmrsys/data~ dof     0
/PMK/PMK-02-393/ox~ dm      nnn
idized/H.fid      dmm      c
ACQUISITION      dmf      200
sfrq    499.832     dseq
tn       H1         dres    1.0
at       3.000     homo    n
np       48000
sw       8000.0    wtfile
fb       not used  proc     ft
bs       4         fn      not used
tpwr     58       math    f
pw       4.8
d1       1.000    werr
tof      499.7    wexp    wft
nt       4        wbs     wft
ct       4        wnt     wft
alock    y
gain     not used
FLAGS
il        n
in        n
dp        y
hs        nn
DISPLAY
sp       -250.0
wp       5498.0
vs       100
sc       0
wc       210
hzmm     26.18
is       251.31
rfl      2035.9
rfp      1024.7
th       5
ins      100.000
nm      cdc  ph
    
```

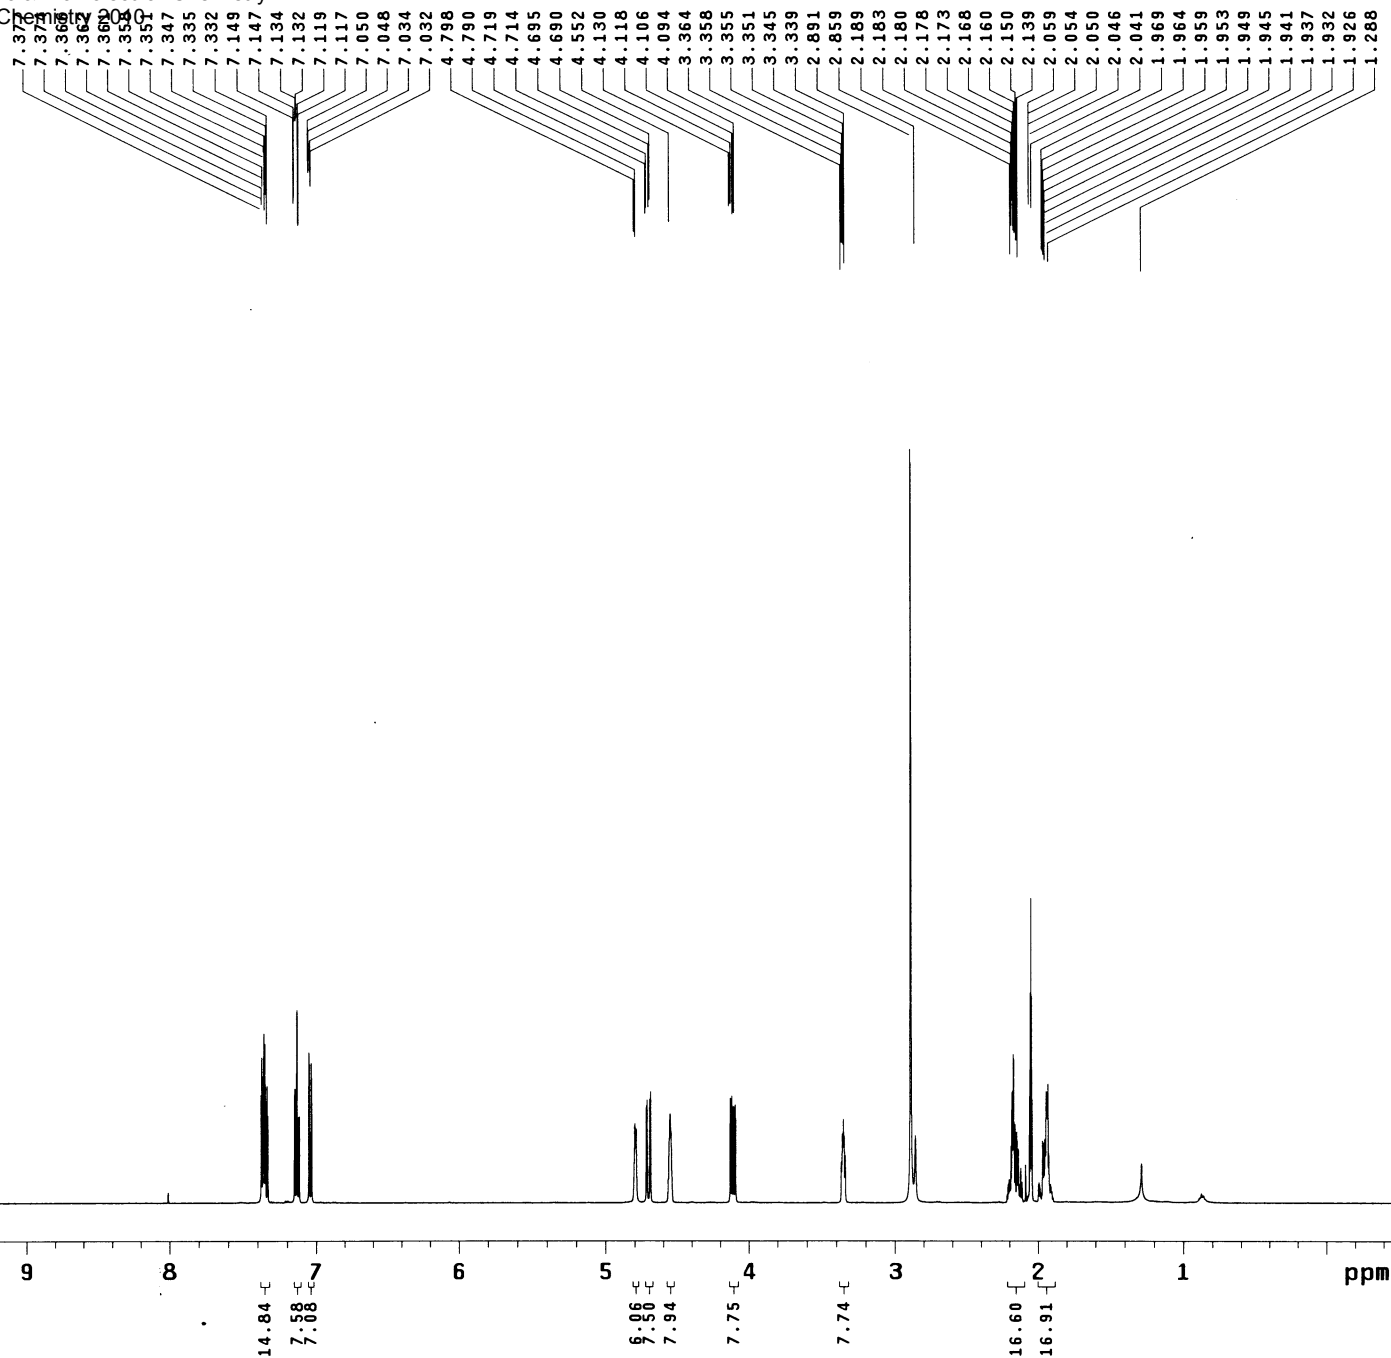

PMK-02#33920120  
 exp34 s2pu1  
 # Supplementary Material (ESI) for Organic & Biomolecular Chemistry  
 # This journal is (c) The Royal Society of Chemistry 2010

```

SAMPLE          DEC. & VT
date Aug 10 2010 dfrq 499.832
solvent Acetone   dn H1
file exp dpwr 39
ACQUISITION    dof 0
sfrq 125.697 dm yyy
tn C13 dmm w
at 1.000 dmf 11905
np 62894 dseq
sw 31446.5 dres 1.0
fb not used homo n
bs 16
ss 2
tpwr 54 wtfile 1.00
pw 4.0 proc ft
d1 1.000 fn not used
tof 2512.2 math f
nt 4096
ct 4096 werr
alock y wexp wft
gain not used wbs wft
        wnt
FLAGS
il n
in n
dp y
hs nn
DISPLAY
sp -1190.0
wp 28906.3
vs 400
sc 0
wc 210
hzmm 137.65
is 500.00
rfl 4941.4
rfp 3750.4
th 7
ins 100.000
nm cdc ph
  
```

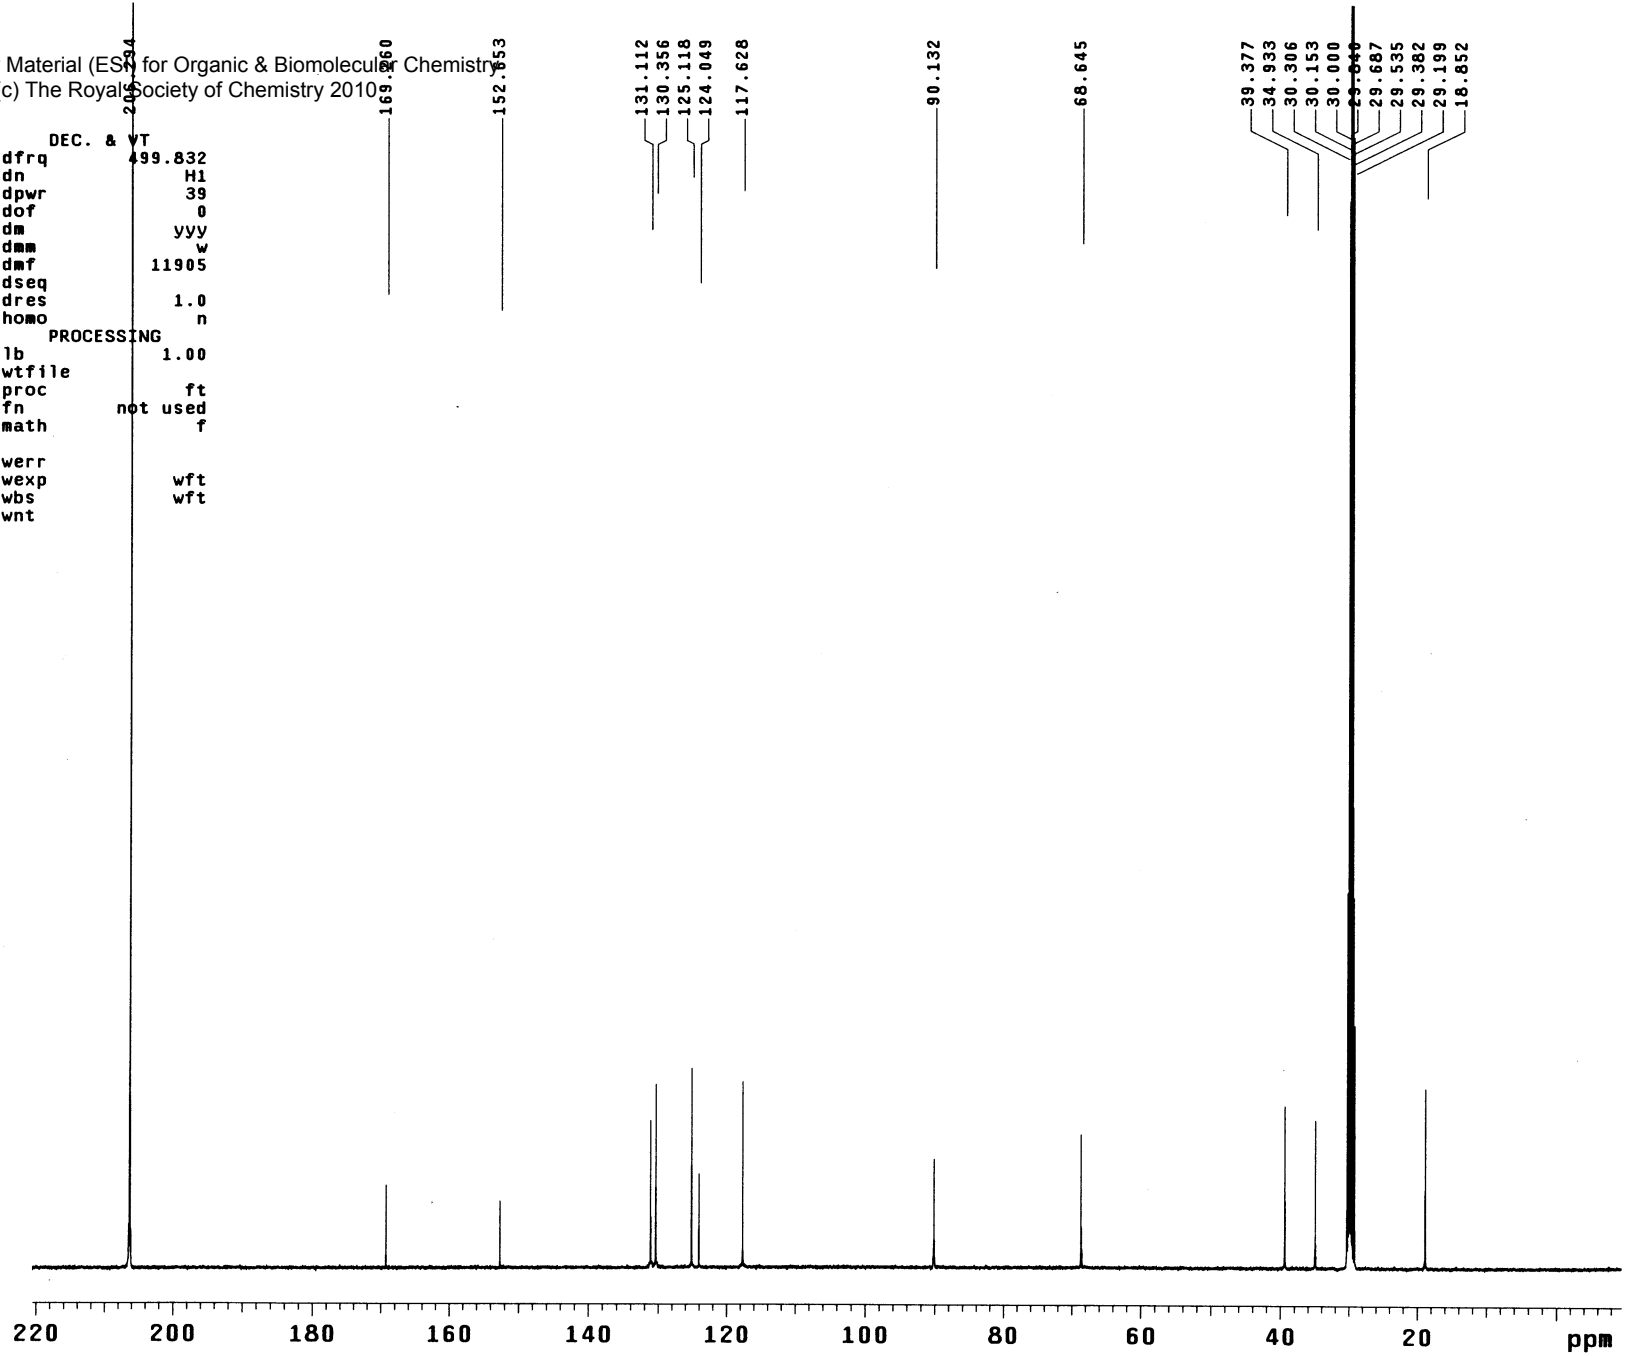

Fig S106. <sup>13</sup>C NMR (acetone-d<sub>6</sub>, 125 MHz) of compound 3m

Fig S107. <sup>1</sup>H NMR (acetone-d<sub>6</sub>, 500 MHz) of compound 3m

PMK-02-393-oxidized

# Supplementary Material (ESI) for Organic & Biomolecular Chemistry  
 exp33 # 101. The Journal is (c) The Royal Society of Chemistry 2010

```

SAMPLE          DEC. & VT
date Aug 10 2010 dfrq 125.694
solvent Acetone dn C13
file /export/home/~ dpwr 30
vnmr1/vnmrSYS/data~ dof 0
/PMK/PMK-02-393/ox~ dm nnn
idized/H.fid dmm c
ACQUISITION    dmf 200
sfrq 499.832 dseq
tn H1 dres 1.0
at 3.000 homo n
np 48000
sw 8000.0 wtfile
fb not used proc ft
bs 4 fn not used
tpwr 58 math f
pw 4.8
dl 1.000 werr
tof 499.7 wexp wft
nt 4 wbs wft
ct 4 wnt wft
alock y
gain not used
FLAGS
il n
in n
dp y
hs nn
DISPLAY
sp -250.0
wp 5498.0
vs 100
sc 0
wc 210
hzmm 26.18
is 251.31
rf1 2035.9
rfp 1024.7
th 5
ins 100.000
nm cdc ph
    
```

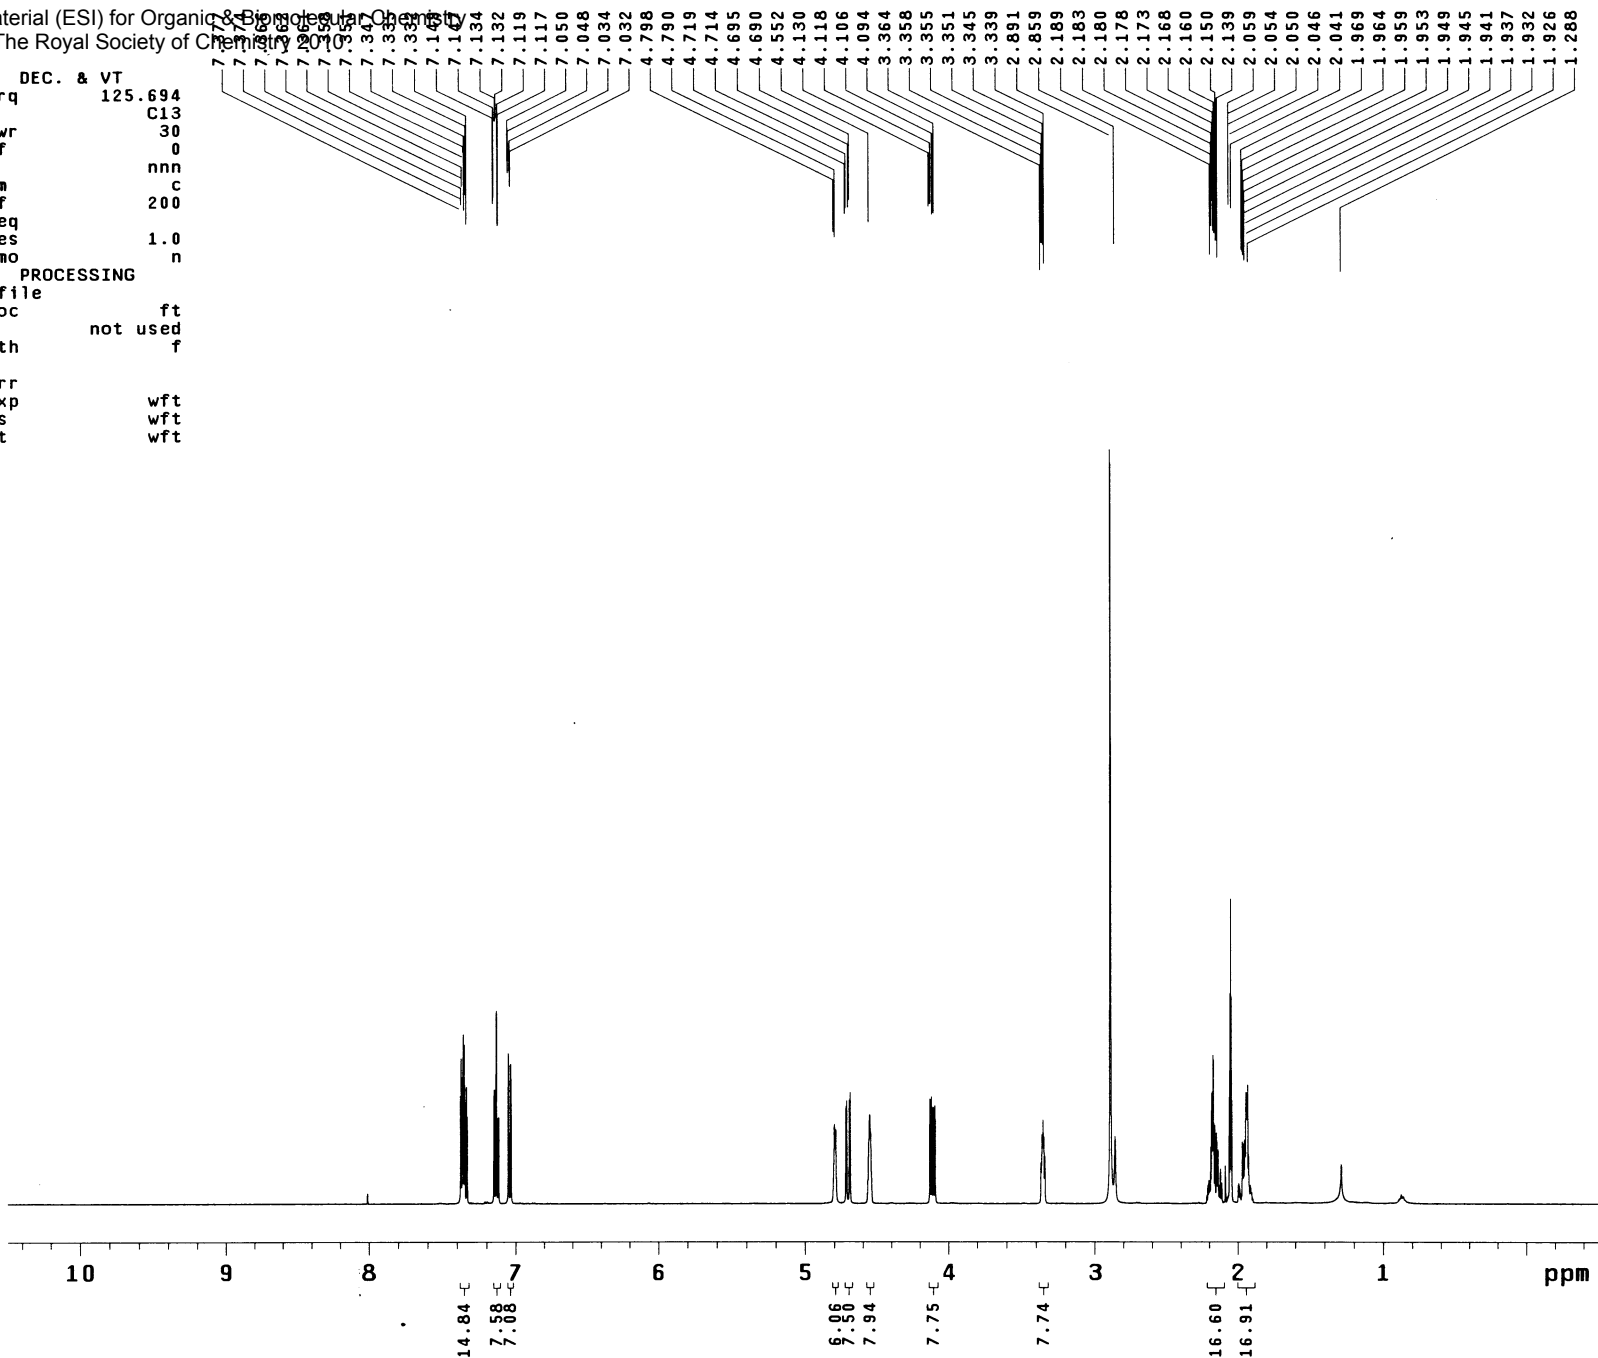

Fig S108. DEPT of compound 3m

PMK-02-393-oxidized  
 # Supplementary Material (ESI) for Organic & Biomolecular Chemistry  
 exp35 DEPT  
 # This journal is (c) The Royal Society of Chemistry 2010

|             |             |          |          |          |      |
|-------------|-------------|----------|----------|----------|------|
| date        | Aug 10 2010 | j1xh     | 140.0    | array    | mult |
| solvent     | Acetone     | mult     | arrayed  | arraydim | 3    |
| sample      | undefined   | SPECIAL  |          |          |      |
| ACQUISITION |             |          |          |          |      |
| sw          | 31446.5     | temp     | not used | 1        | mult |
| at          | 1.000       | gain     | 30       | 1        | 0.5  |
| np          | 62894       | spin     | 0        | 2        | 1    |
| bs          | 16          | lb       | 1.00     | 3        | 1.5  |
| ss          | -4          | fn       | not used |          |      |
| d1          | 1.000       | SPECTRUM |          |          |      |
| nt          | 1024        | wp       | 28906.3  |          |      |
| ct          | 1024        | sp       | 1189.1   |          |      |
| TRANSMITTER |             |          |          |          |      |
| tn          | C13         | rp       | -128.5   |          |      |
| tof         | 2512.2      | lp       | 186.5    |          |      |
| tpwr        | 54          | ai       | cdc ph   |          |      |
| REFERENCE   |             |          |          |          |      |
| pw          | 11.500      | rfl      | 1190.0   |          |      |
| DECOUPLER   |             |          |          |          |      |
| dn          | H1          | rfp      | 0        |          |      |
| PLOT        |             |          |          |          |      |
| dof         | 0           | wc       | 210      |          |      |
| dpwr        | 39          | sc       | 0        |          |      |
| dm          | nny         | vs       | 100      |          |      |
| dmm         | ccw         | hzmm     | 137.65   |          |      |
| dmf         | 11905       | th       | 68       |          |      |
| pp1v1       | 51          |          |          |          |      |
| pp          | 28.000      |          |          |          |      |

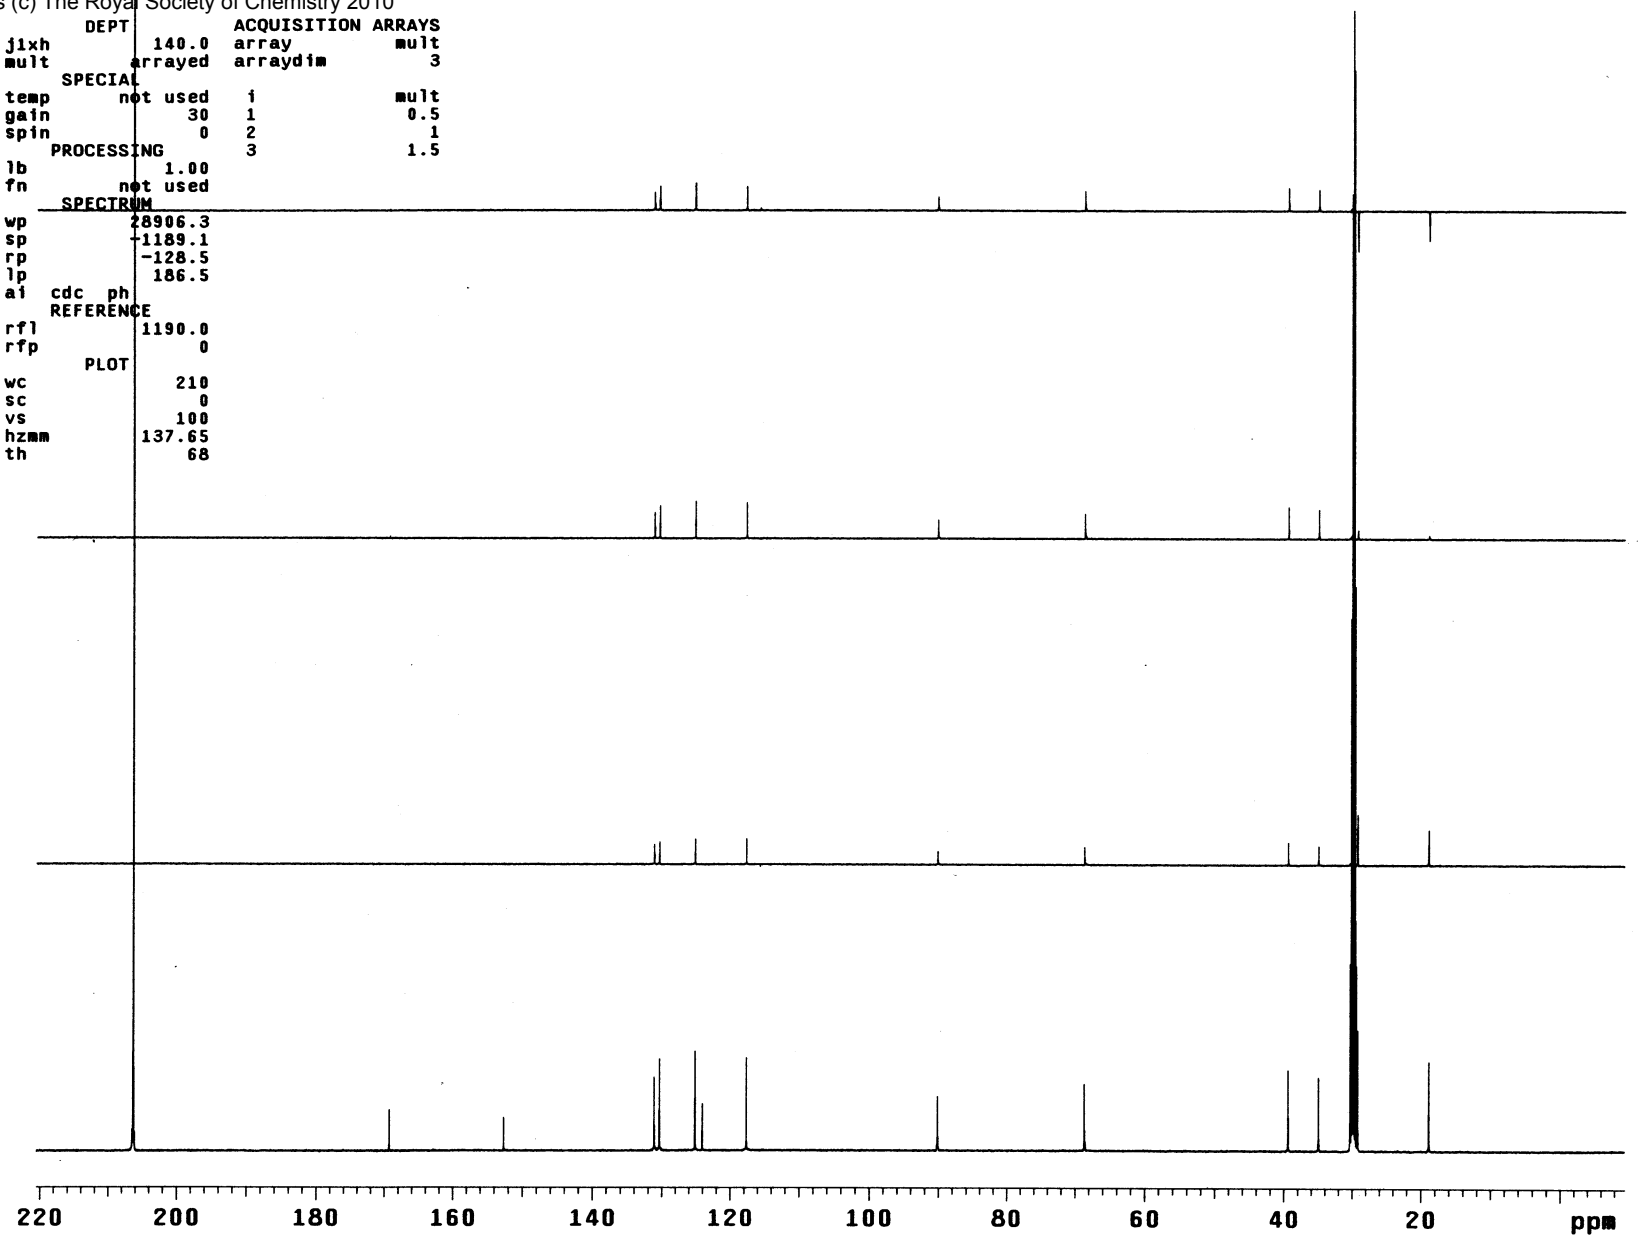

Fig S109. Another DEPT of compound 3m

PMK-02-393-oxidized

exp35 # 21 Supplementary Material (ESI) for Organic & Biomolecular Chemistry

# This journal is (c) The Royal Society of Chemistry 2010

|             |             |            |          |          |       |      |
|-------------|-------------|------------|----------|----------|-------|------|
| date        | Aug 10 2010 | j1xh       | DEPT     | 140.0    | array | mult |
| solvent     | Acetone     | mult       | arrayed  | arraydim | 3     |      |
| sample      | undefined   | SPECIAL    |          |          |       |      |
| ACQUISITION |             |            |          |          |       |      |
| sw          | 31446.5     | temp       | not used | 1        | mult  |      |
| at          | 1.000       | gain       | 30       | 1        | 0.5   |      |
| np          | 62894       | spin       | 0        | 2        | 1     |      |
| bs          | 16          | PROCESSING |          |          |       |      |
| ss          | -4          | lb         | 1.00     | 3        | 1.5   |      |
| di          | 1.000       | fn         | not used |          |       |      |
| nt          | 1024        | SPECTRUM   |          |          |       |      |
| ct          | 1024        | wp         | 31445.6  |          |       |      |
| TRANSMITTER |             |            |          |          |       |      |
| tn          | C13         | sp         | -1189.1  |          |       |      |
| tof         | 2512.2      | rp         | -128.5   |          |       |      |
| tpwr        | 54          | lp         | 186.5    |          |       |      |
| pw          | 11.500      | ai         | cdc ph   |          |       |      |
| DECOUPLER   |             |            |          |          |       |      |
| dn          | H1          | rfl        | 1190.0   |          |       |      |
| doF         | 0           | rfp        | 0        |          |       |      |
| dpwr        | 39          | PLOT       |          |          |       |      |
| dm          | nny         | wc         | 210      |          |       |      |
| dmm         | ccw         | sc         | 0        |          |       |      |
| dm7         | 11905       | vs         | 100      |          |       |      |
| pp1v1       | 51          | hzmm       | 149.74   |          |       |      |
| pp          | 28.000      | th         | 68       |          |       |      |

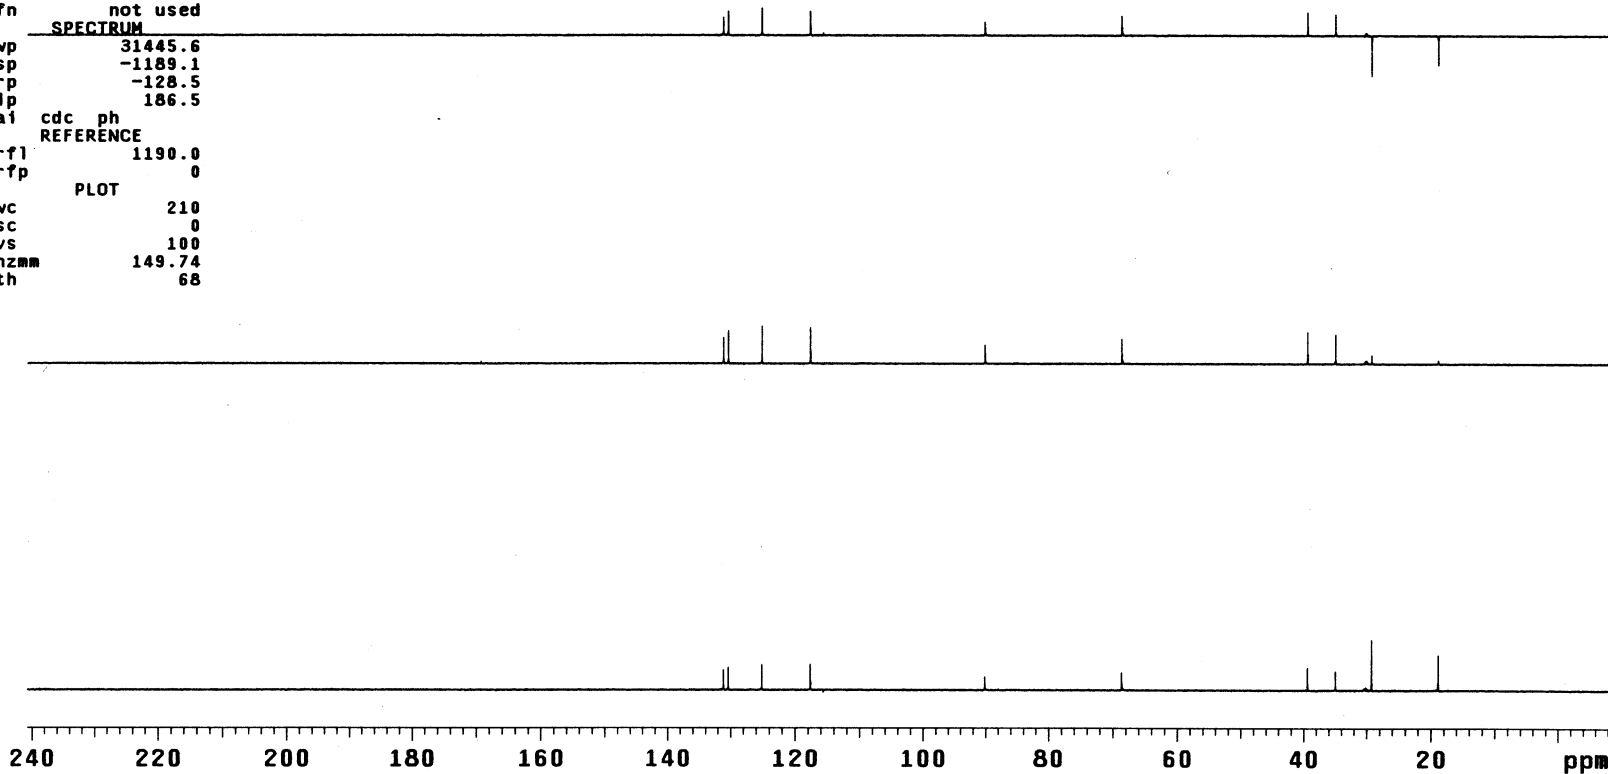

PMK-02-393-oxidized  
 # Supplementary Material (ESI) for Organic & Biomolecular Chemistry  
 experimental is (c) The Royal Society of Chemistry 2010

Fig S110. HSQC of compound 3m

| SAMPLE           | FLAGS         | ACQUISITION | ARRAYS |
|------------------|---------------|-------------|--------|
| date Aug 10 2010 | hs            | n           | phase  |
| solvent Acetone  | sspul         | y           | 256    |
| sample undefined | PFGflg        | y           |        |
| ACQUISITION      | hsglv1        | 1003        | phase  |
| sw 5006.3        | SPECIAL       | 1           | 1      |
| at 0.205         | temp not used | 2           | 2      |
| np 2048          | gain          | 20          |        |
| fb not used      | spin          | 0           |        |
| ss 32            | GRADIENTS     |             |        |
| d1 1.000         | gzlv11        | 1003        |        |
| nt 8             | gt1           | 0.002000    |        |
| 2D ACQUISITION   | gzlv13        | 505         |        |
| sw1 21367.5      | gt3           | 0.001000    |        |
| ni 128           | gstab         | 0.000500    |        |
| phase arrayed    | F2 PROCESSING |             |        |
| TRANSMITTER      | gf            | 0.094       |        |
| tn H1            | gfs           | not used    |        |
| sfrq 499.831     | fn            | 2048        |        |
| tof -499.9       | F1 PROCESSING |             |        |
| tpwr 58          | gf1           | 0.006       |        |
| pv 11.100        | gfs1          | not used    |        |
| DECOUPLER        | proc1         | lp          |        |
| dn C13           | fn1           | 2048        |        |
| dof -2515.1      | DISPLAY       |             |        |
| dm nny           | sp            | 796.0       |        |
| dmm ccp          | wp            | 3040.9      |        |
| dmf 32258        | sp1           | 1155.9      |        |
| dpwr 36          | wp1           | 16255.2     |        |
| pwxlv1 52        | rfl           | 4033.5      |        |
| pwx 14.300       | rfp           | 3519.3      |        |
| HSQC             | rfl1          | 15965.0     |        |
| j1xh 140.0       | rfl1          | 14783.7     |        |
| nullflg y        | PLOT          |             |        |
| mult 2           | wc            | 150.0       |        |
|                  | sc            | 6.2         |        |
|                  | wc2           | 116.2       |        |
|                  | sc2           | 0           |        |
|                  | vs            | 100         |        |
|                  | th            | 5           |        |
|                  | ai cdc ph     |             |        |

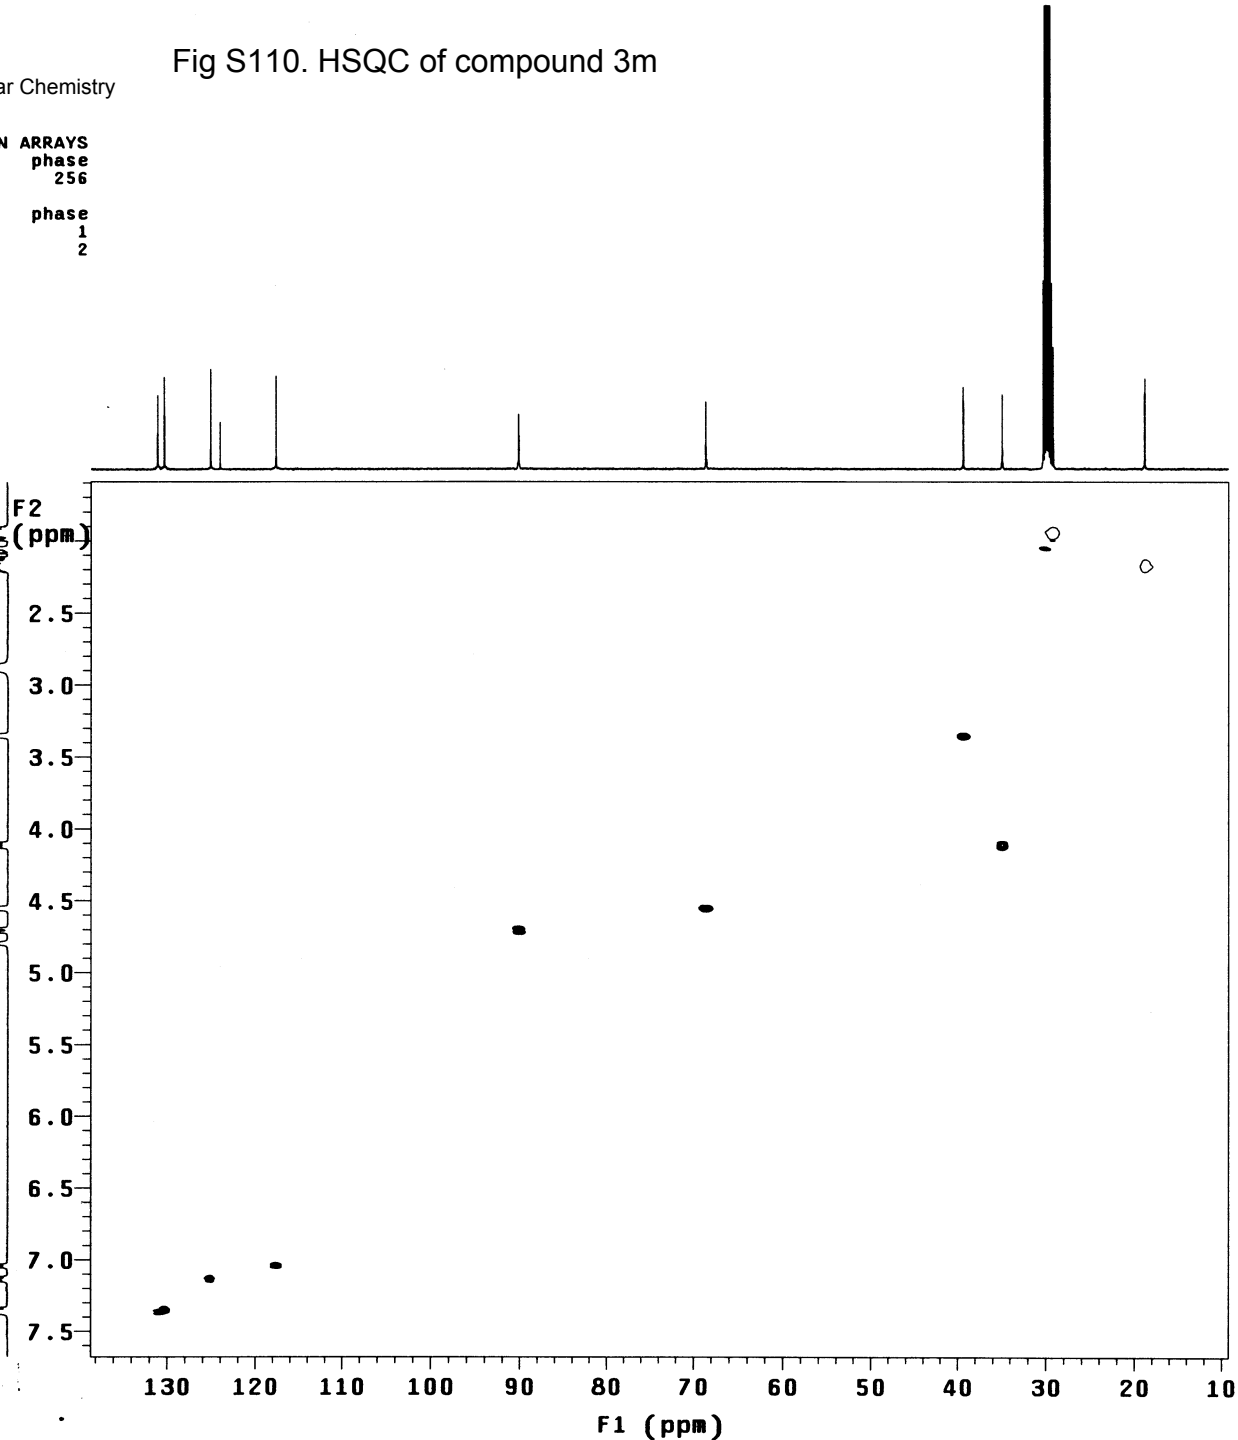

Fig S111. COSY of compound 3m

PMK-2010-08-10-17-41 Material (ESI) for Organic & Biomolecular Chemistry  
 # This journal is (c) The Royal Society of Chemistry 2010

```

SAMPLE          FLAGS
date Aug 10 2010 hs nn
solvent Acetone sspul n
sample undefined hsglv1 1003
ACQUISITION    SPECIAL
sw 5006.3 temp not used
at 0.205 gain 30
np 2048 spin 0
fb not used F2 PROCESSING
ss 16 sb -0.102
d1 1.000 sbs not used
nt 8 fn 2048
2D ACQUISITION F1 PROCESSING
sw1 5006.3 sb1 -0.026
ni 128 sbs1 not used
TRANSMITTER    procl lp
tn H1 fn1 2048
sfrq 499.831 DISPLAY
tof -499.9 sp 791.4
tpwr 58 wp 3006.7
pw 11.100 sp1 777.4
GRADIENTS      wp1 3011.6
gzlv1 1003 rfl 2789.2
gt1 0.001000 rfp 2275.2
gstab 0.000500 rfl1 2788.5
DECOUPLER      rfp1 2275.2
dn C13 PLOT
dm nnn wc 155.0
sc 10.0
wc2 155.0
sc2 0
vs 100
th 9
a1 cdc av
    
```

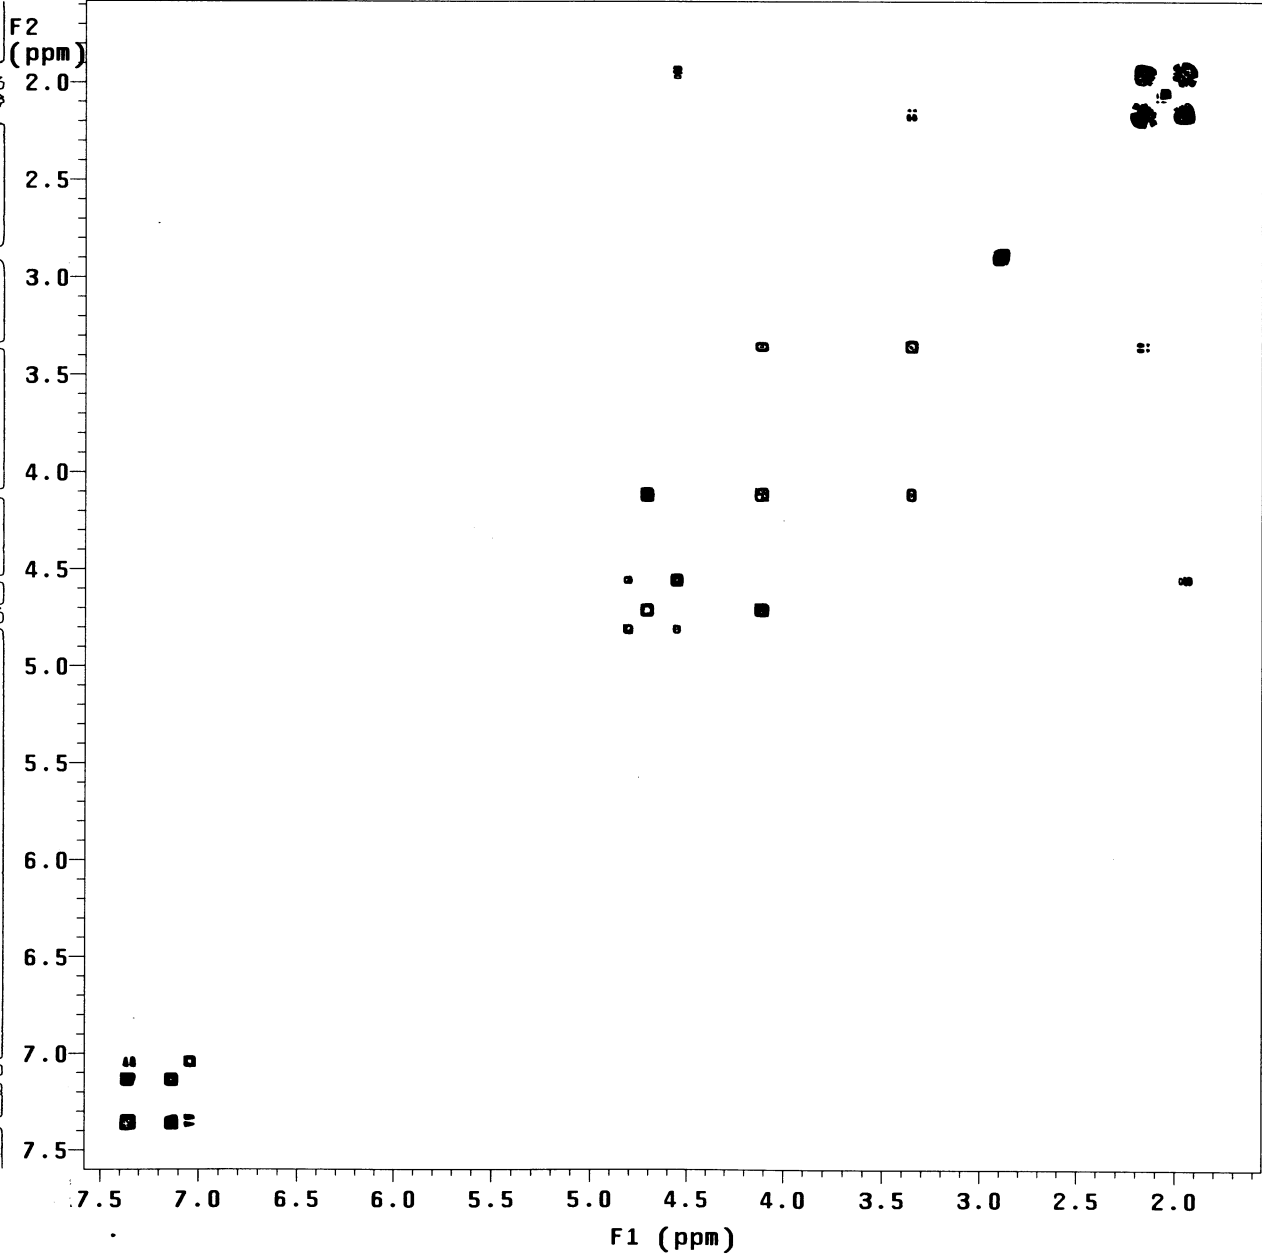

Fig S112. NOESY of compound 3m

# Supplementary Material (ESI) for Organic & Biomolecular Chemistry  
 # This journal is (c) The Royal Society of Chemistry 2010

exp37 NOESY

| SAMPLE         |             | FLAGS         |          |
|----------------|-------------|---------------|----------|
| date           | Aug 10 2010 | hs            | n        |
| solvent        | Acetone     | sspul         | y        |
| sample         | undefined   | PFGflg        | y        |
| ACQUISITION    |             | hsglvi        | 1003     |
| sw             | 5006.3      | SPECIAL       |          |
| at             | 0.205       | temp          | not used |
| np             | 2048        | gain          | 30       |
| fb             | not used    | spin          | 0        |
| ss             | 32          | F2 PROCESSING |          |
| d1             | 1.000       | gf            | 0.094    |
| nt             | 8           | gfs           | not used |
| 2D ACQUISITION |             | fn            | 2048     |
| sw1            | 5006.3      | F1 PROCESSING |          |
| ni             | 200         | gf1           | 0.037    |
| TRANSMITTER    |             | gfs1          | not used |
| tn             | H1          | procl         | 1p       |
| sfrq           | 499.831     | fn1           | 2048     |
| tof            | -499.9      | DISPLAY       |          |
| tpwr           | 58          | sp            | 852.4    |
| pw             | 11.100      | wp            | 2952.9   |
| NOESY          |             | sp1           | 855.6    |
| mix            | 0.600       | wp1           | 2957.8   |
| PRESATURATION  |             | rf1           | 2791.7   |
| satmode        | nnnn        | rfp           | 2275.2   |
| satpwr         | 0           | rf11          | 2788.5   |
| satdly         | 0           | rfp1          | 2275.2   |
| satfrq         | 0           | PLOT          |          |
| DECOUPLER      |             | wc            | 155.0    |
| dn             | C13         | sc            | 10.0     |
| dm             | nnn         | wc2           | 155.0    |
|                |             | sc2           | 0        |
|                |             | vs            | 100      |
|                |             | th            | 1        |
|                |             | ai            | ph       |

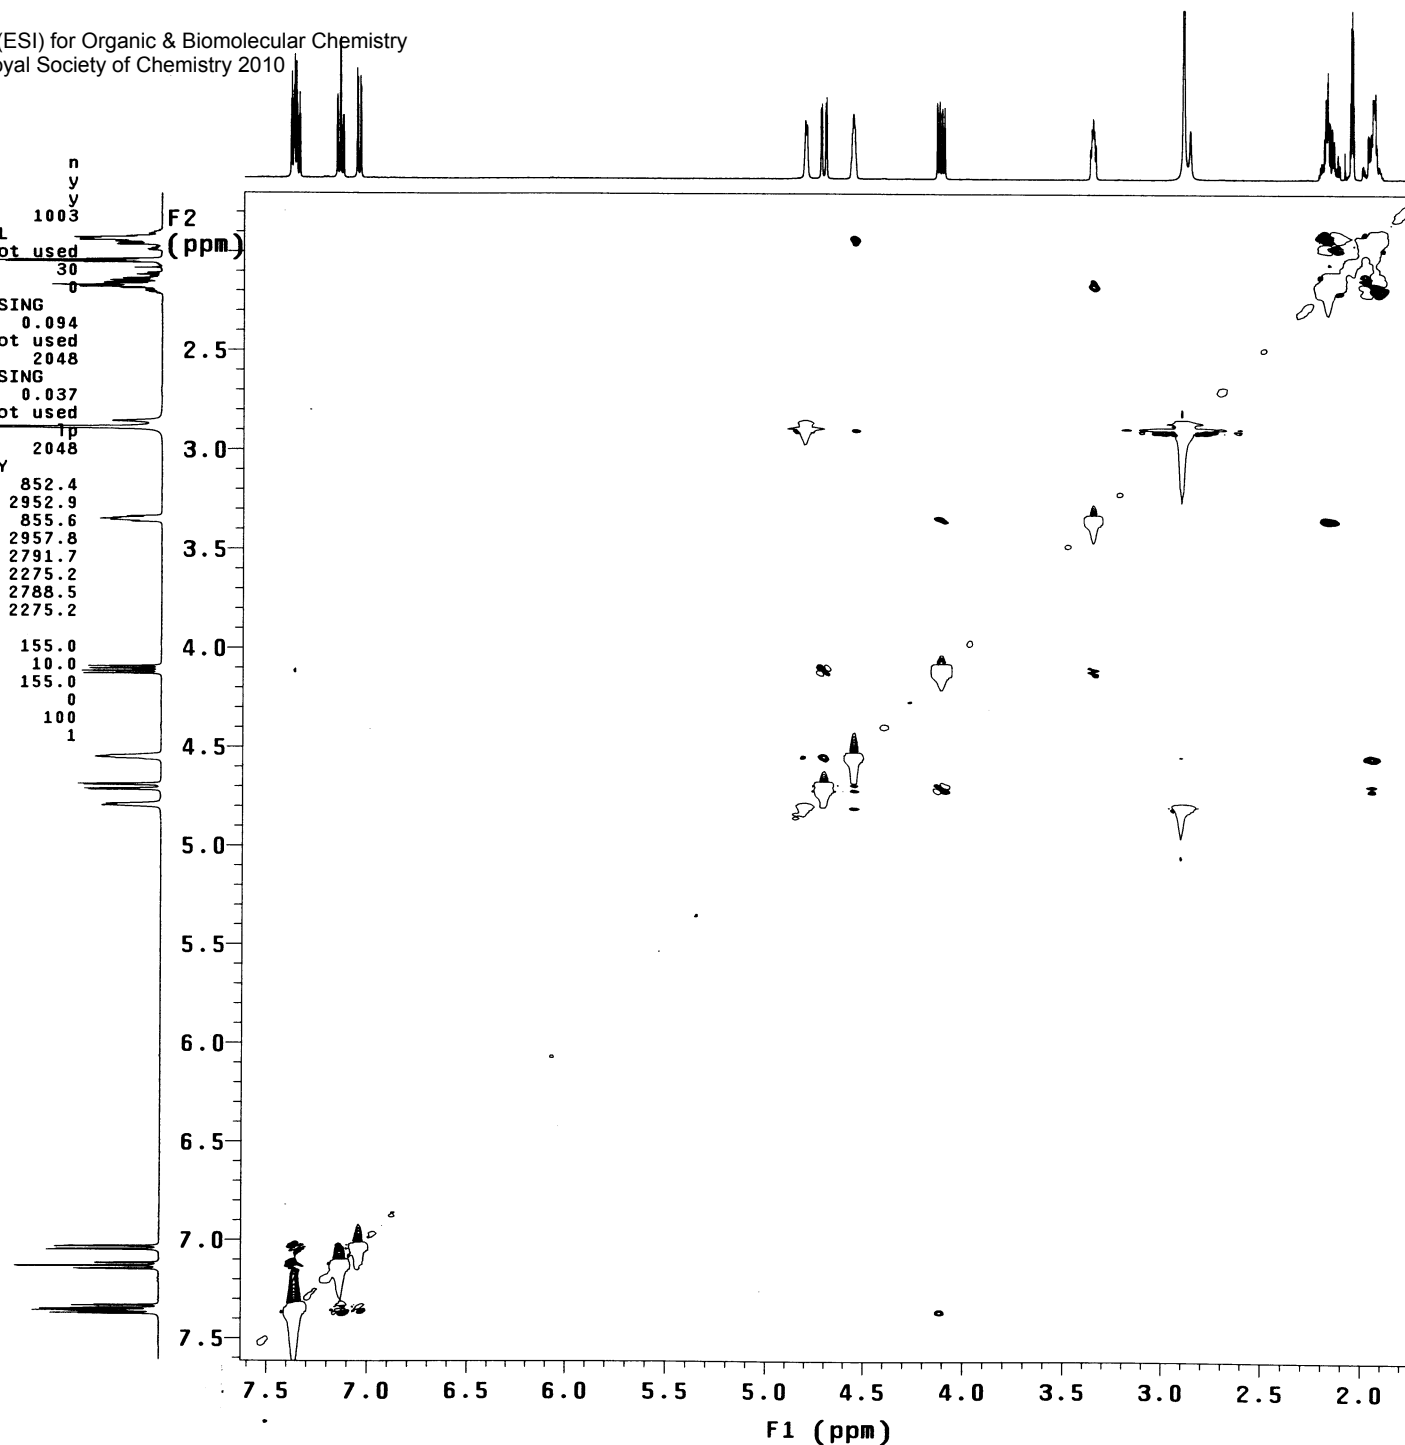



Fig S113. 1H NMR (acetone-d6, 500 MHz) of compound 3n

PMK-02-404-f2-oxidized

# Supplementary Material (ESI) for Organic & Biomolecular Chemistry  
 exp39 s2#4 This journal is (c) The Royal Society of Chemistry 2010

|                     |                |            |          |
|---------------------|----------------|------------|----------|
| SAMPLE              |                | DEC. & VT  |          |
| date                | Aug 21 2010    | dfrq       | 125.694  |
| solvent             | Acetone        | dn         | C13      |
| file                | /export/home/~ | dpwr       | 30       |
| vnmr1/vnmr          | sys/data~      | dof        | 0        |
| /PMK/PMK-02-404/F2~ |                | dm         | nnn      |
| -oxidized/H.fid     |                | dmm        | c        |
| ACQUISITION         |                | dmf        | 200      |
| sfrq                | 499.832        | dseq       |          |
| tn                  | H1             | dres       | 1.0      |
| at                  | 3.000          | homo       | n        |
| np                  | 48000          | temp       | 23.0     |
| sw                  | 8000.0         | PROCESSING |          |
| fb                  | not used       | wtfile     |          |
| bs                  | 4              | proc       | ft       |
| tpwr                | 58             | fn         | not used |
| pw                  | 4.8            | math       | f        |
| d1                  | 1.000          |            |          |
| tof                 | 499.7          | werr       |          |
| nt                  | 4              | wexp       | wft      |
| ct                  | 4              | wbs        | wft      |
| alock               | y              | wnt        | wft      |
| gain                | not used       |            |          |
| FLAGS               |                |            |          |
| il                  | n              |            |          |
| in                  | n              |            |          |
| dp                  | y              |            |          |
| hs                  | nn             |            |          |
| DISPLAY             |                |            |          |
| sp                  | -250.0         |            |          |
| wp                  | 5498.0         |            |          |
| vs                  | 100            |            |          |
| sc                  | 0              |            |          |
| wc                  | 210            |            |          |
| hzmm                | 26.18          |            |          |
| is                  | 300.47         |            |          |
| rfl                 | 2035.6         |            |          |
| rfp                 | 1024.7         |            |          |
| th                  | 2              |            |          |
| ins                 | 100.000        |            |          |
| nm                  | cdc ph         |            |          |

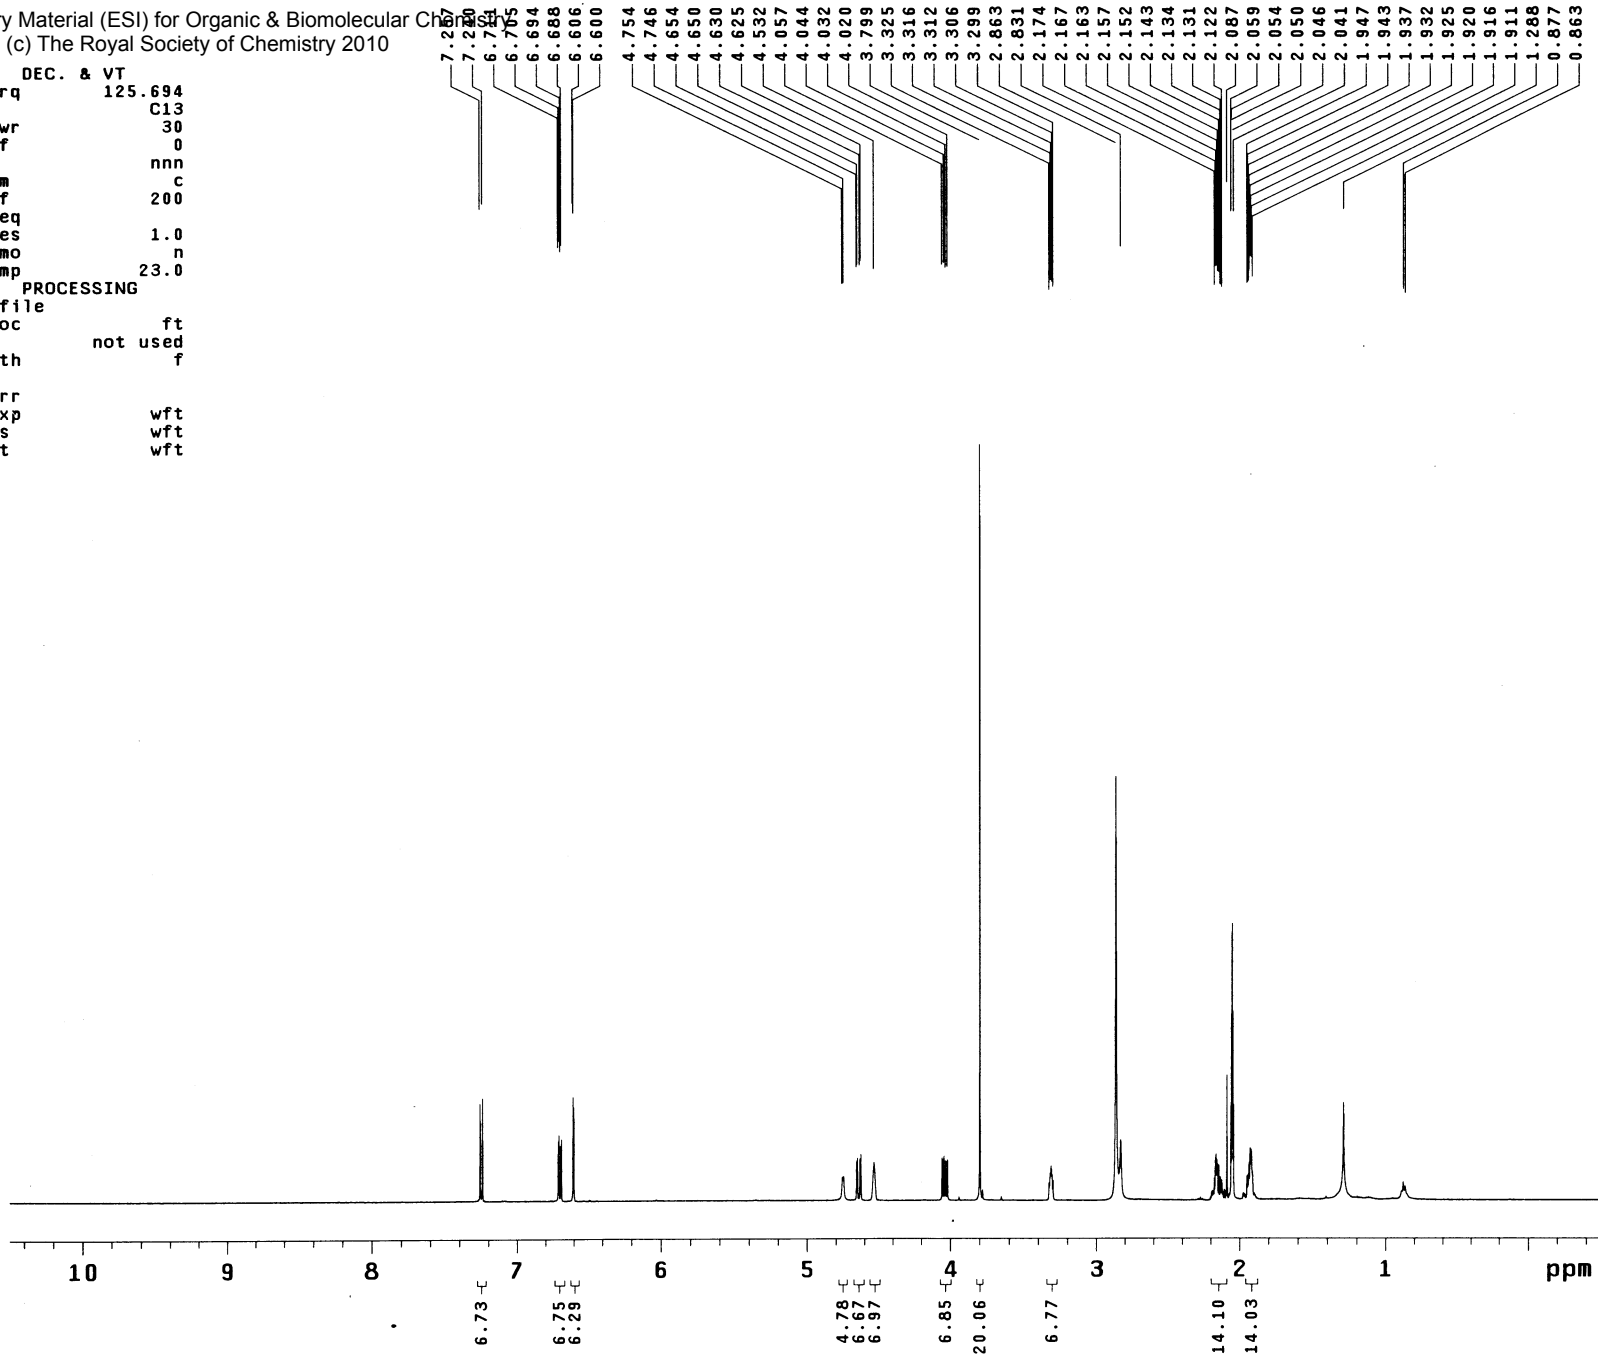

Fig S114. <sup>13</sup>C NMR (acetone-d<sub>6</sub>, 125 MHz) of compound 3n

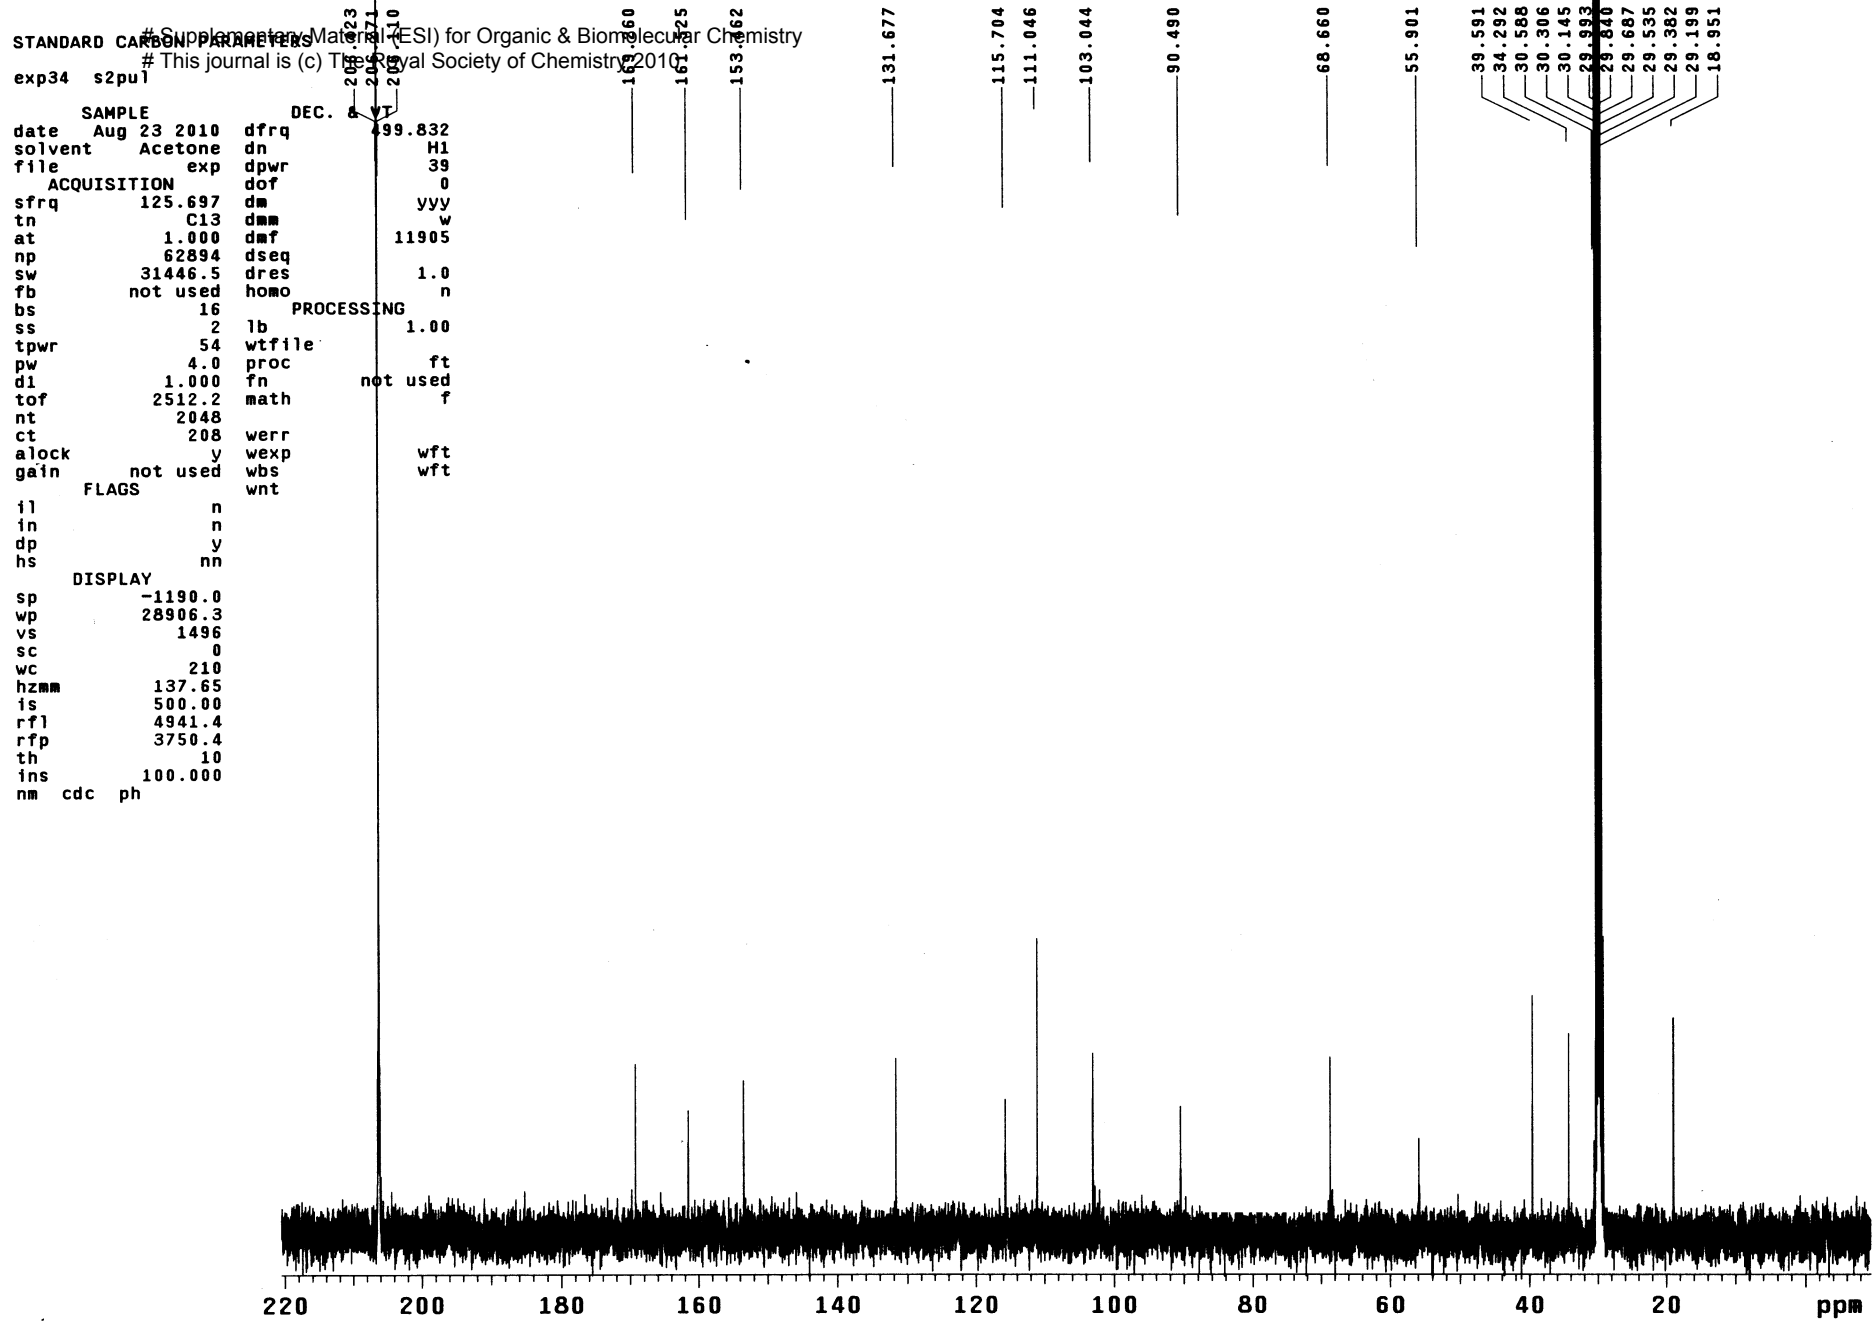

exp34 s2pu1

| SAMPLE      |             | DEC. & VT  |          |
|-------------|-------------|------------|----------|
| date        | Aug 23 2010 | dfrq       | 499.832  |
| solvent     | Acetone     | dn         | H1       |
| file        | exp         | dpwr       | 39       |
| ACQUISITION |             |            |          |
| sfrq        | 125.697     | dof        | 0        |
| tn          | C13         | dm         | yvy      |
| at          | 1.000       | dmm        | w        |
| np          | 62894       | dsef       | 11905    |
| sw          | 31446.5     | dres       | 1.0      |
| fb          | not used    | homo       | n        |
| bs          | 16          | PROCESSING |          |
| ss          | 2           | lb         | 1.00     |
| tpwr        | 54          | wtfile     |          |
| pw          | 4.0         | proc       | ft       |
| d1          | 1.000       | fn         | not used |
| tof         | 2512.2      | math       | f        |
| nt          | 2048        |            |          |
| ct          | 2048        | werr       |          |
| alock       | y           | wexp       | wft      |
| gain        | not used    | wbs        | wft      |
| FLAGS       |             |            |          |
| il          | n           |            |          |
| in          | n           |            |          |
| dp          | y           |            |          |
| hs          | nn          |            |          |
| DISPLAY     |             |            |          |
| sp          | 3519.1      |            |          |
| wp          | 501.9       |            |          |
| vs          | 2117        |            |          |
| sc          | 0           |            |          |
| wc          | 210         |            |          |
| hzmm        | 2.39        |            |          |
| is          | 500.00      |            |          |
| rfl         | 4941.4      |            |          |
| rfp         | 3750.4      |            |          |
| th          | 7           |            |          |
| ins         | 100.000     |            |          |
| nm          | cdc ph      |            |          |

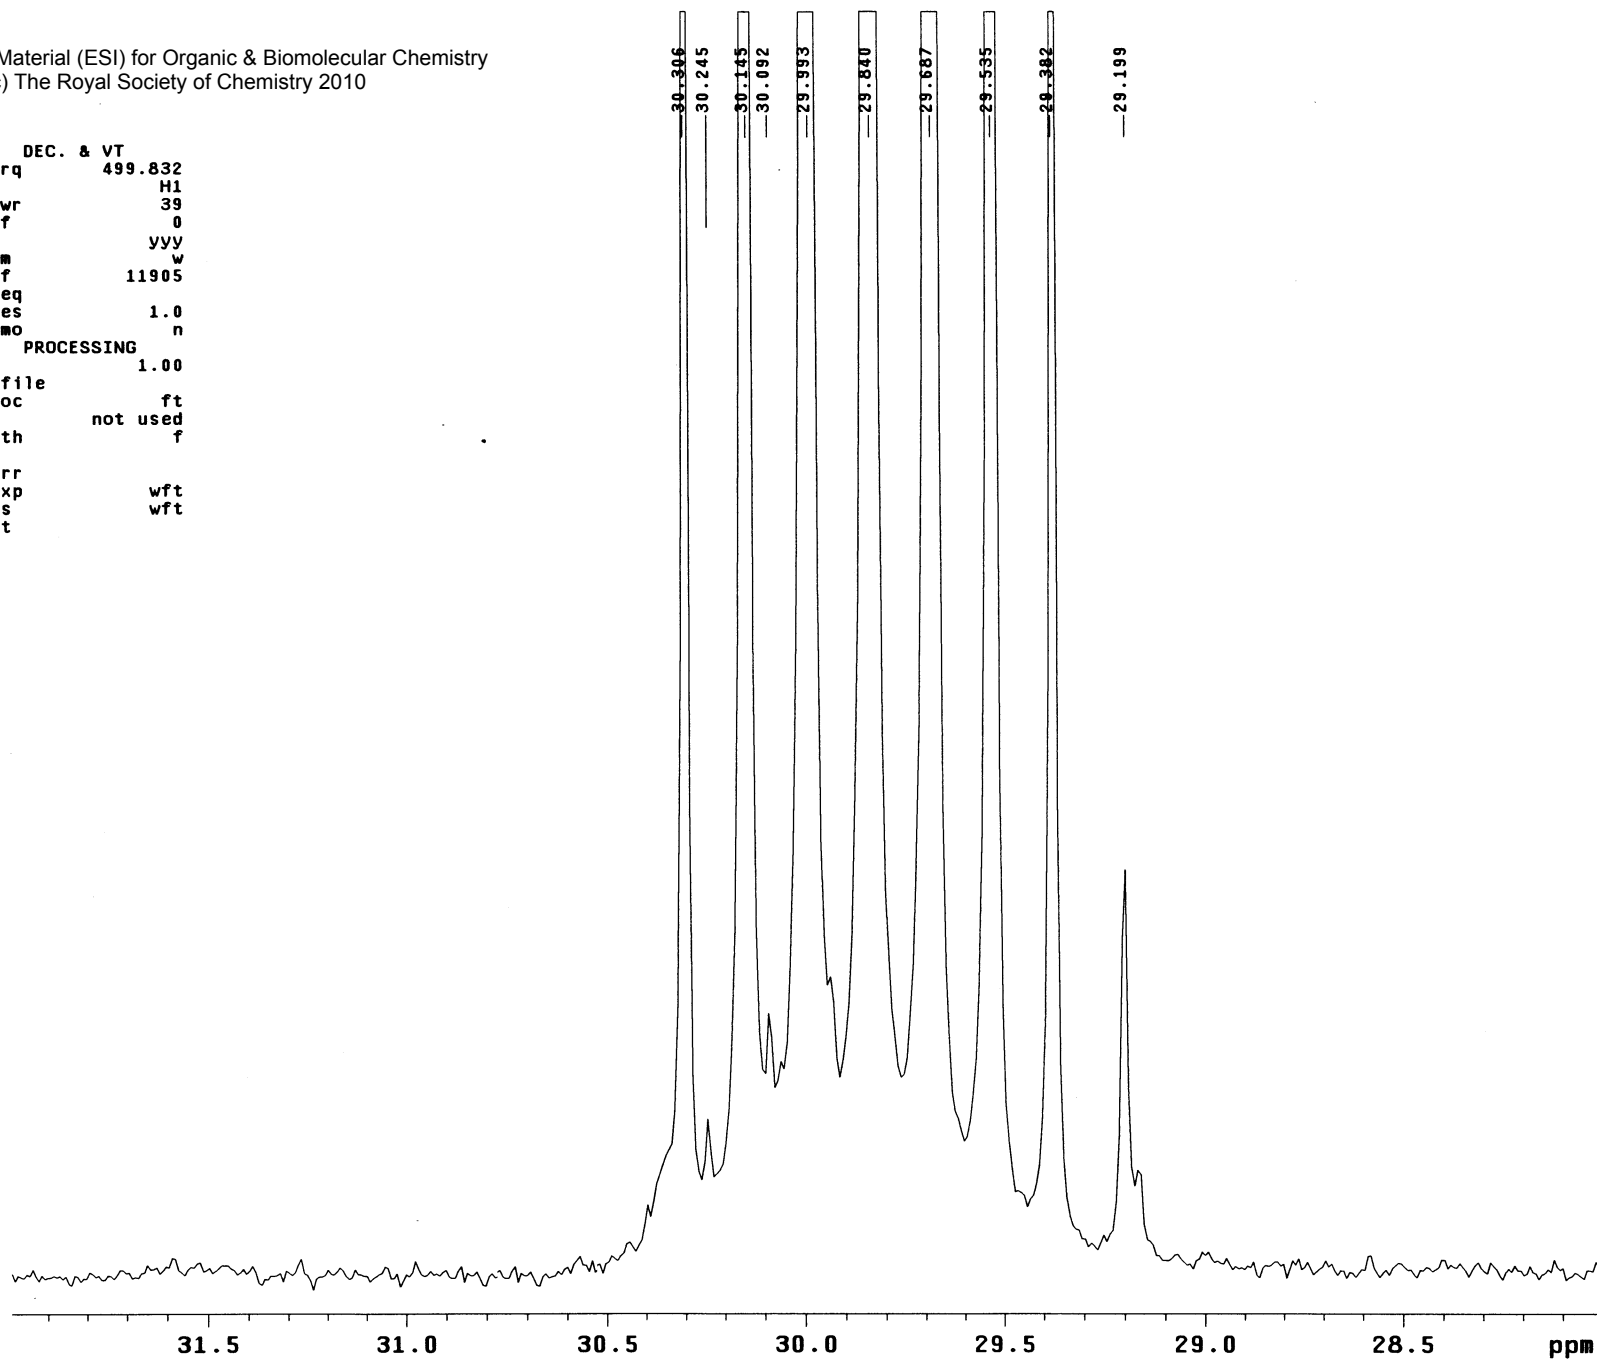

Fig S115. <sup>13</sup>C NMR (acetone-d<sub>6</sub>, 125 MHz) of compound 3n (Expand).

# Fig S116. DEPT of compound 3n

PMK-02-404-12-oxidized  
 # Supplementary Material (ESI) for Organic & Biomolecular Chemistry  
 exp35 DEPT This journal is (c) The Royal Society of Chemistry 2010

|                  |            |                    |
|------------------|------------|--------------------|
| SAMPLE           | DEPT       | ACQUISITION ARRAYS |
| date Aug 21 2018 | j1xh       | 140.0              |
| solvent Acetone  | mult       | array              |
| sample undefined | SPECIAL    | arraydim           |
| ACQUISITION      | temp       | mult               |
| sw 31446.5       | gain       | 30                 |
| at 1.000         | spin       | 0                  |
| np 62894         | PROCESSING | 3                  |
| bs 16            | lb         | 1.00               |
| ss -4            | fn         | not used           |
| d1 1.000         | SPECTRUM   |                    |
| nt 1024          | wp         | 2896.3             |
| ct 1024          | sp         | -1257.3            |
| TRANSMITTER      | rp         | -33.9              |
| tn C13           | lp         | 130.4              |
| tof 2512.2       | ai         | cdc ph             |
| tpwr 54          | REFERENCE  |                    |
| pw 11.500        | rfl        | 3573.8             |
| DECOUPLER        | rfp        | 2279.1             |
| dn H1            | PLOT       |                    |
| dof 0            | wc         | 210                |
| dpwr 39          | sc         | 0                  |
| dm nny           | vs         | 400                |
| dmm ccw          | hzmm       | 137.65             |
| dmf 11905        | th         | 14                 |
| pp1v1 51         |            |                    |
| pp 28.000        |            |                    |

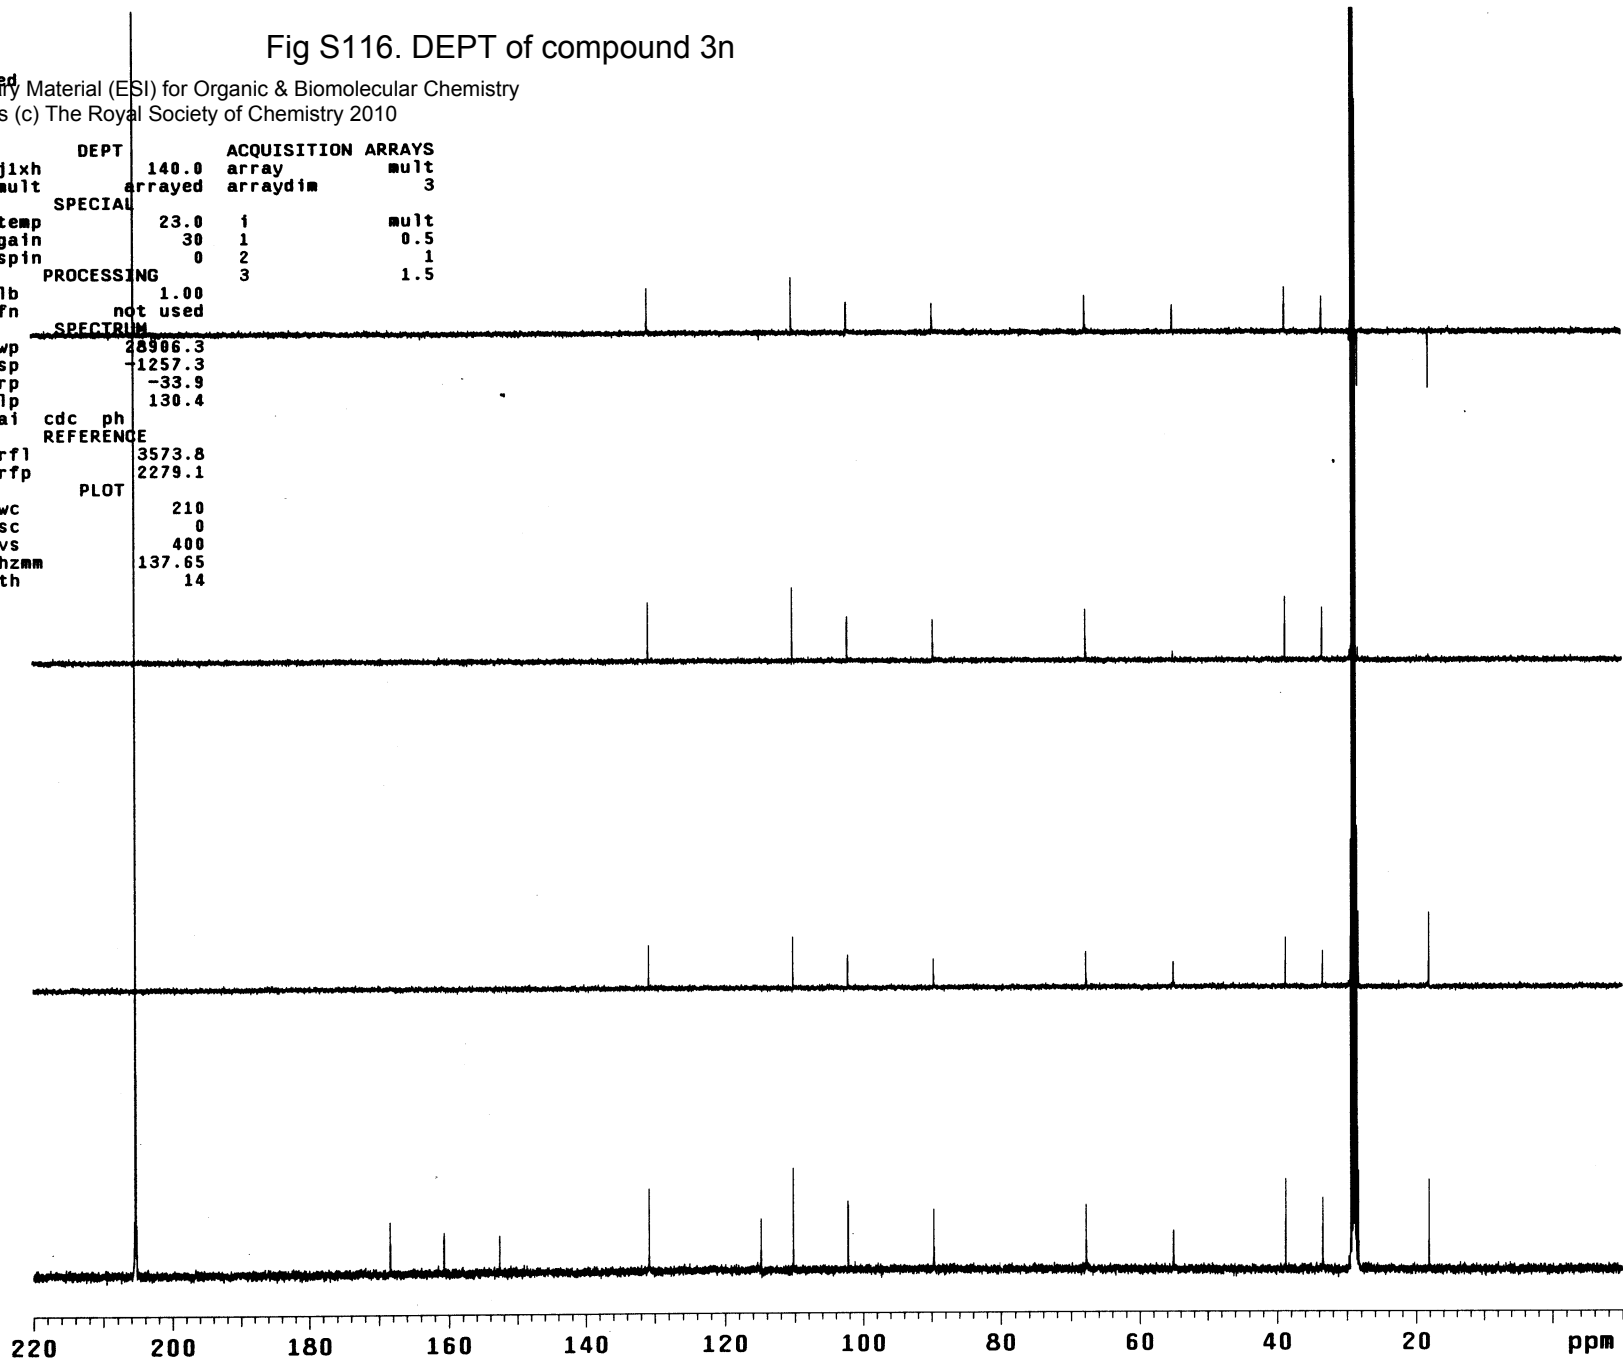

Fig S117. HSQC of compound 3n

PMK-02-494-72-0211790  
 # Supplementary Material (ESI) for Organic & Biomolecular Chemistry  
 exp38 #gHSQC  
 Journal is (c) The Royal Society of Chemistry 2010

| SAMPLE           | FLAGS         | ACQUISITION | ARRAYS |
|------------------|---------------|-------------|--------|
| date Aug 21 2010 | hs            | n           | phase  |
| solvent Acetone  | sspul         | y           | 256    |
| sample undefined | PFGflg        | y           |        |
| ACQUISITION      | hsglv1        | 1003        | 1      |
| sw 4490.3        | SPECIAL       | 1           | phase  |
| at 0.228         | temp          | 23.0        | 1      |
| np 2048          | gain          | 20          | 2      |
| fb not used      | spin          | 0           |        |
| ss 32            | GRADIENTS     |             |        |
| d1 1.000         | gzlv11        | 1003        |        |
| nt 4             | gt1           | 0.002000    |        |
| 2D ACQUISITION   | gzlv13        | 505         |        |
| sw1 21367.5      | gt3           | 0.001000    |        |
| n1 128           | gstab         | 0.000500    |        |
| phase arrayed    | F2 PROCESSING |             |        |
| TRANSMITTER      | gf            | 0.105       |        |
| tn H1            | gfs           | not used    |        |
| sfrq 499.832     | fn            | 2048        |        |
| tof -250.0       | F1 PROCESSING |             |        |
| tpwr 58          | gf1           | 0.006       |        |
| pw 11.100        | gfs1          | not used    |        |
| DECOUPLER        | procl         | 1p          |        |
| dn C13           | fn1           | 2048        |        |
| dof -2515.1      | DISPLAY       |             |        |
| dm nny           | sp            | 491.9       |        |
| dmm ccp          | wp            | 3723.0      |        |
| dmf 32258        | sp1           | 1244.7      |        |
| dpwr 36          | wp1           | 17611.5     |        |
| pwxlv1 52        | rfl           | 2268.9      |        |
| pwx 14.300       | rfp           | 2265.2      |        |
| HSQC             | rfl1          | 9805.0      |        |
| j1xh 140.0       | rfp1          | 8524.8      |        |
| nullflg y        | PLOT          |             |        |
| mult 2           | wc            | 150.0       |        |
|                  | sc            | 6.2         |        |
|                  | wc2           | 116.2       |        |
|                  | sc2           | 0           |        |
|                  | vs            | 200         |        |
|                  | th            | 5           |        |
|                  | a1            | cdc         | ph     |

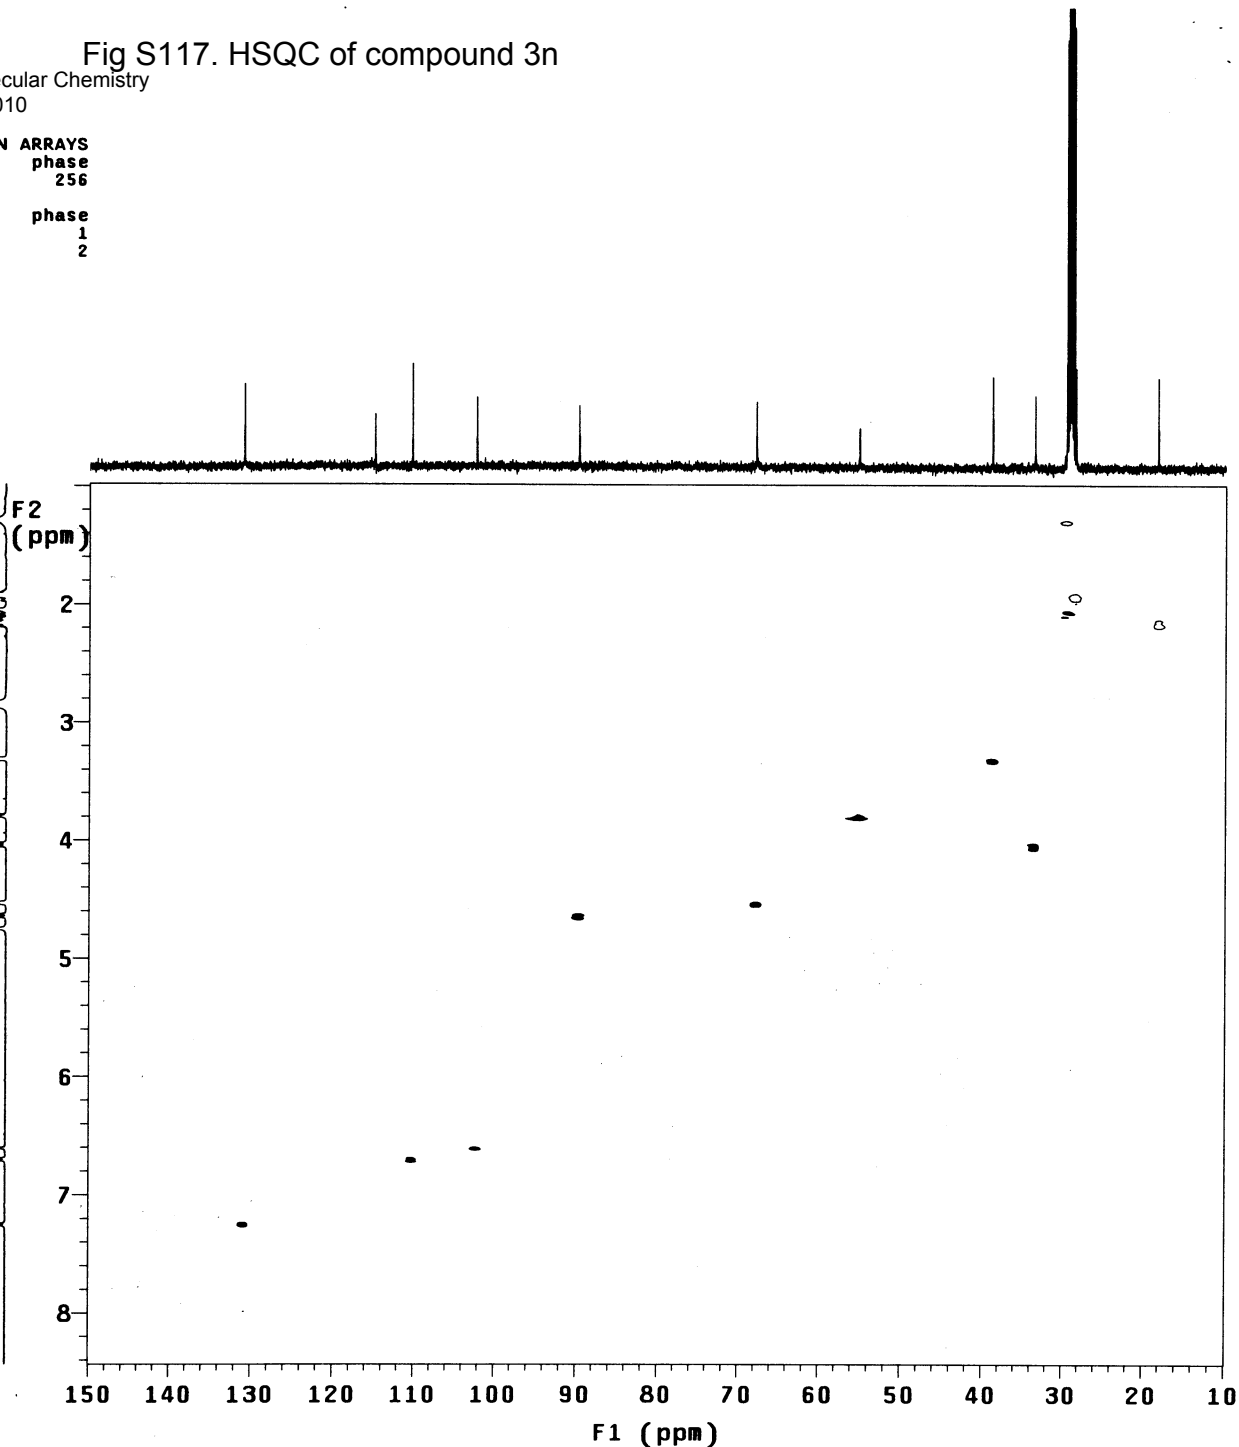

Fig S118. COSY of compound 3n

# Supplementary Material (ESI) for Organic & Biomolecular Chemistry  
 PMK-102-104-T2-0x1012ed  
 # This journal is (c) The Royal Society of Chemistry 2010  
 exp36 gCOSY

|                |             |               |          |
|----------------|-------------|---------------|----------|
| date           | Aug 21 2010 | hs            | nn       |
| solvent        | Acetone     | sspul         | n        |
| sample         | undefined   | hsglv1        | 1003     |
| ACQUISITION    |             | SPECIAL       |          |
| sw             | 4490.3      | temp          | 23.0     |
| at             | 0.228       | gain          | 30       |
| np             | 2048        | spin          | 0        |
| fb             | not used    | F2 PROCESSING |          |
| ss             | 16          | sb            | -0.114   |
| d1             | 1.000       | sbs           | not used |
| nt             | 4           | fn            | 2048     |
| 2D ACQUISITION |             | F1 PROCESSING |          |
| sw1            | 4490.3      | sb1           | -0.029   |
| ni             | 128         | sbs1          | not used |
| TRANSMITTER    |             | proc1         |          |
| tn             | H1          | fn1           | 2048     |
| sfrq           | 499.832     | DISPLAY       |          |
| tof            | -250.0      | sp            | 844.4    |
| tpwr           | 58          | wp            | 3249.4   |
| pw             | 11.100      | sp1           | 848.5    |
| GRADIENTS      |             | wp1           | 3249.4   |
| gzlv11         | 1003        | rfl           | 2380.5   |
| gt1            | 0.001000    | rfp           | 2374.2   |
| gstab          | 0.000500    | rfl1          | 2380.7   |
| DECOUPLER      |             | rfp1          | 2374.2   |
| dn             | C13         | PLOT          |          |
| dm             | nnn         | wc            | 155.0    |
|                |             | sc            | 10.0     |
|                |             | wc2           | 155.0    |
|                |             | sc2           | 0        |
|                |             | vs            | 200      |
|                |             | th            | 7        |
|                |             | ai            | cdc av   |

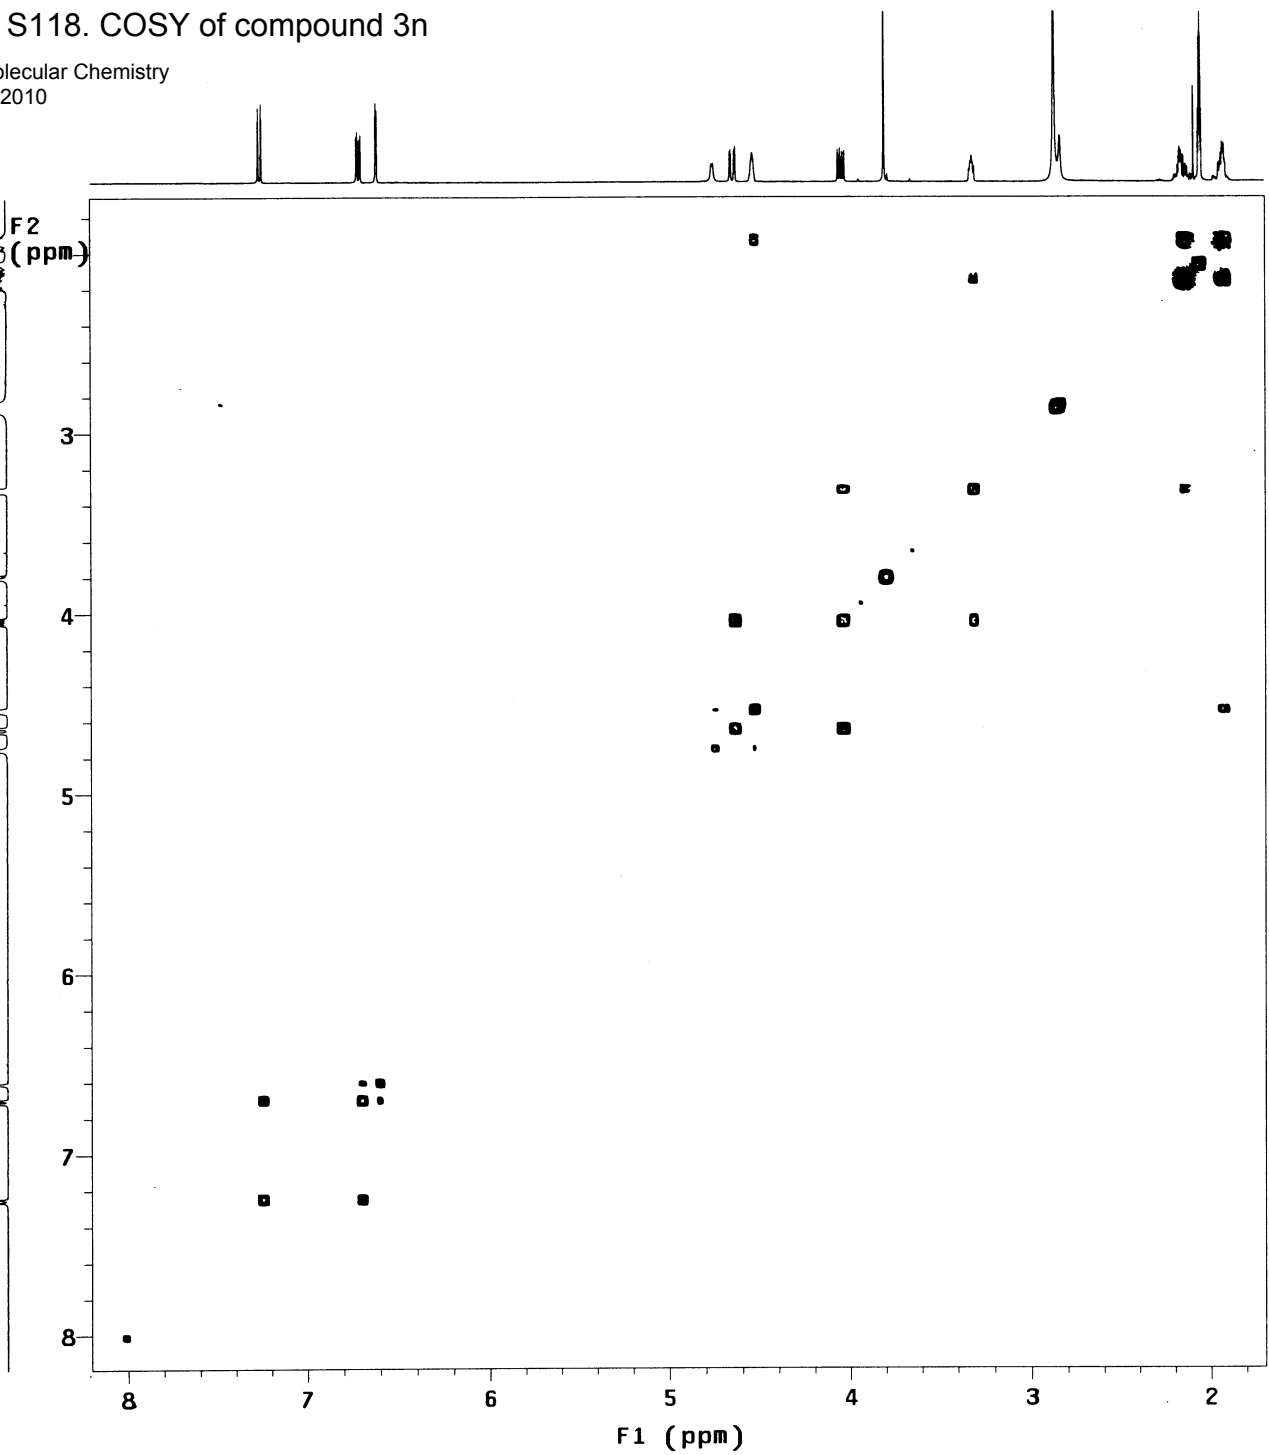

# Fig S119. NOESY of compound 3n

# Supplementary Material (ESI) for Organic & Biomolecular Chemistry  
 PMK-02-40713-0111-1 (c) The Royal Society of Chemistry 2010

exp37 NOESY

| SAMPLE         |             | FLAGS         |          |
|----------------|-------------|---------------|----------|
| date           | Aug 21 2010 | hs            | n        |
| solvent        | Acetone     | sspul         | y        |
| sample         | undefined   | PFgflg        | y        |
| ACQUISITION    |             | hsglv1        | 1003     |
| sw             | 4490.3      | SPECIAL       |          |
| at             | 0.228       | temp          | 23.0     |
| np             | 2048        | gain          | 30       |
| fb             | not used    | spin          | 0        |
| ss             | 32          | F2 PROCESSING |          |
| d1             | 1.000       | gf            | 0.105    |
| nt             | 8           | gfs           | not used |
| 2D ACQUISITION |             | fn            | 2048     |
| sw1            | 4490.3      | F1 PROCESSING |          |
| ni             | 200         | gf1           | 0.041    |
| TRANSMITTER    |             | gfs1          | not used |
| tn             | H1          | proc1         | lp       |
| sfrq           | 499.832     | fn1           | 2048     |
| tof            | -250.0      | DISPLAY       |          |
| tpwr           | 58          | sp            | 815.1    |
| pw             | 11.100      | wp            | 3341.4   |
| NOESY          |             | sp1           | 831.2    |
| mix            | 0.600       | wp1           | 3337.1   |
| PRESATURATION  |             | rfl           | 2379.1   |
| satmode        | nnnn        | rfp           | 2374.2   |
| satpwr         | 0           | rfl1          | 2380.5   |
| satdly         | 0           | rfp1          | 2374.2   |
| satfrq         | 0           | PLOT          |          |
| DECOUPLER      |             | wc            | 155.0    |
| dn             | C13         | sc            | 10.0     |
| dm             | nnn         | wc2           | 155.0    |
|                |             | sc2           | 0        |
|                |             | vs            | 200      |
|                |             | th            | 3        |
|                |             | ai            | ph       |

F2  
(ppm)

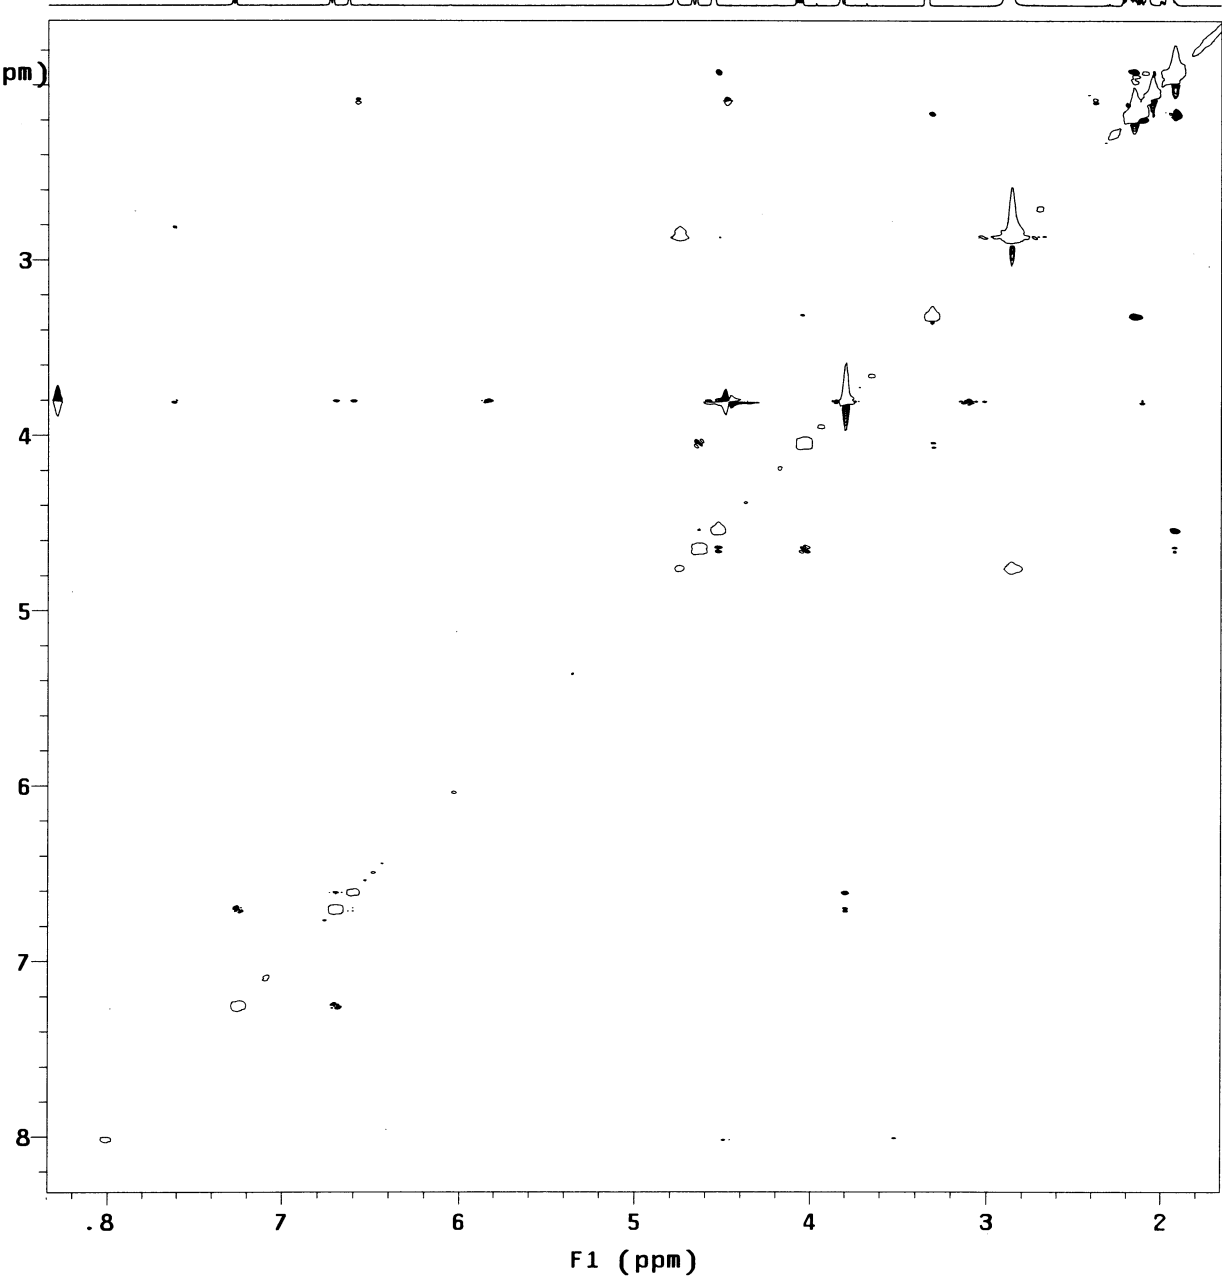

F1 (ppm)

PMK-02-406-f1-oxidized

# Supplementary Material (ESI) for Organic & Biomolecular Chemistry  
# This journal is (c) The Royal Society of Chemistry 2010

exp13 s2hu1  
SAMPLE DEC. & VT  
date Aug 25 2010 dfrq 125.694  
solvent Acetone dn C13  
file exp dpwr 30  
ACQUISITION dof 0  
sfrq 499.832 dm nnn  
tn H1 dmm c  
at 3.000 dmf 200  
np 48000 dseq  
sw 8000.0 dres 1.0  
fb not used homo n  
bs 4  
tpwr 58 wfile  
pw 4.8 proc ft  
d1 1.000 fn not used  
tof 499.7 math f  
nt 4  
ct 4 werr  
alock y wexp wft  
gain not used wbs wft  
FLAGS wnt wft  
i} n  
in n  
dp y  
hs nn  
DISPLAY  
sp -250.0  
wp 5498.0  
vs 100  
sc 0  
wc 210  
hzmm 26.18  
is 570.00  
rfl 2035.9  
rfp 1024.7  
th 2  
ins 100.000  
nm cdc ph

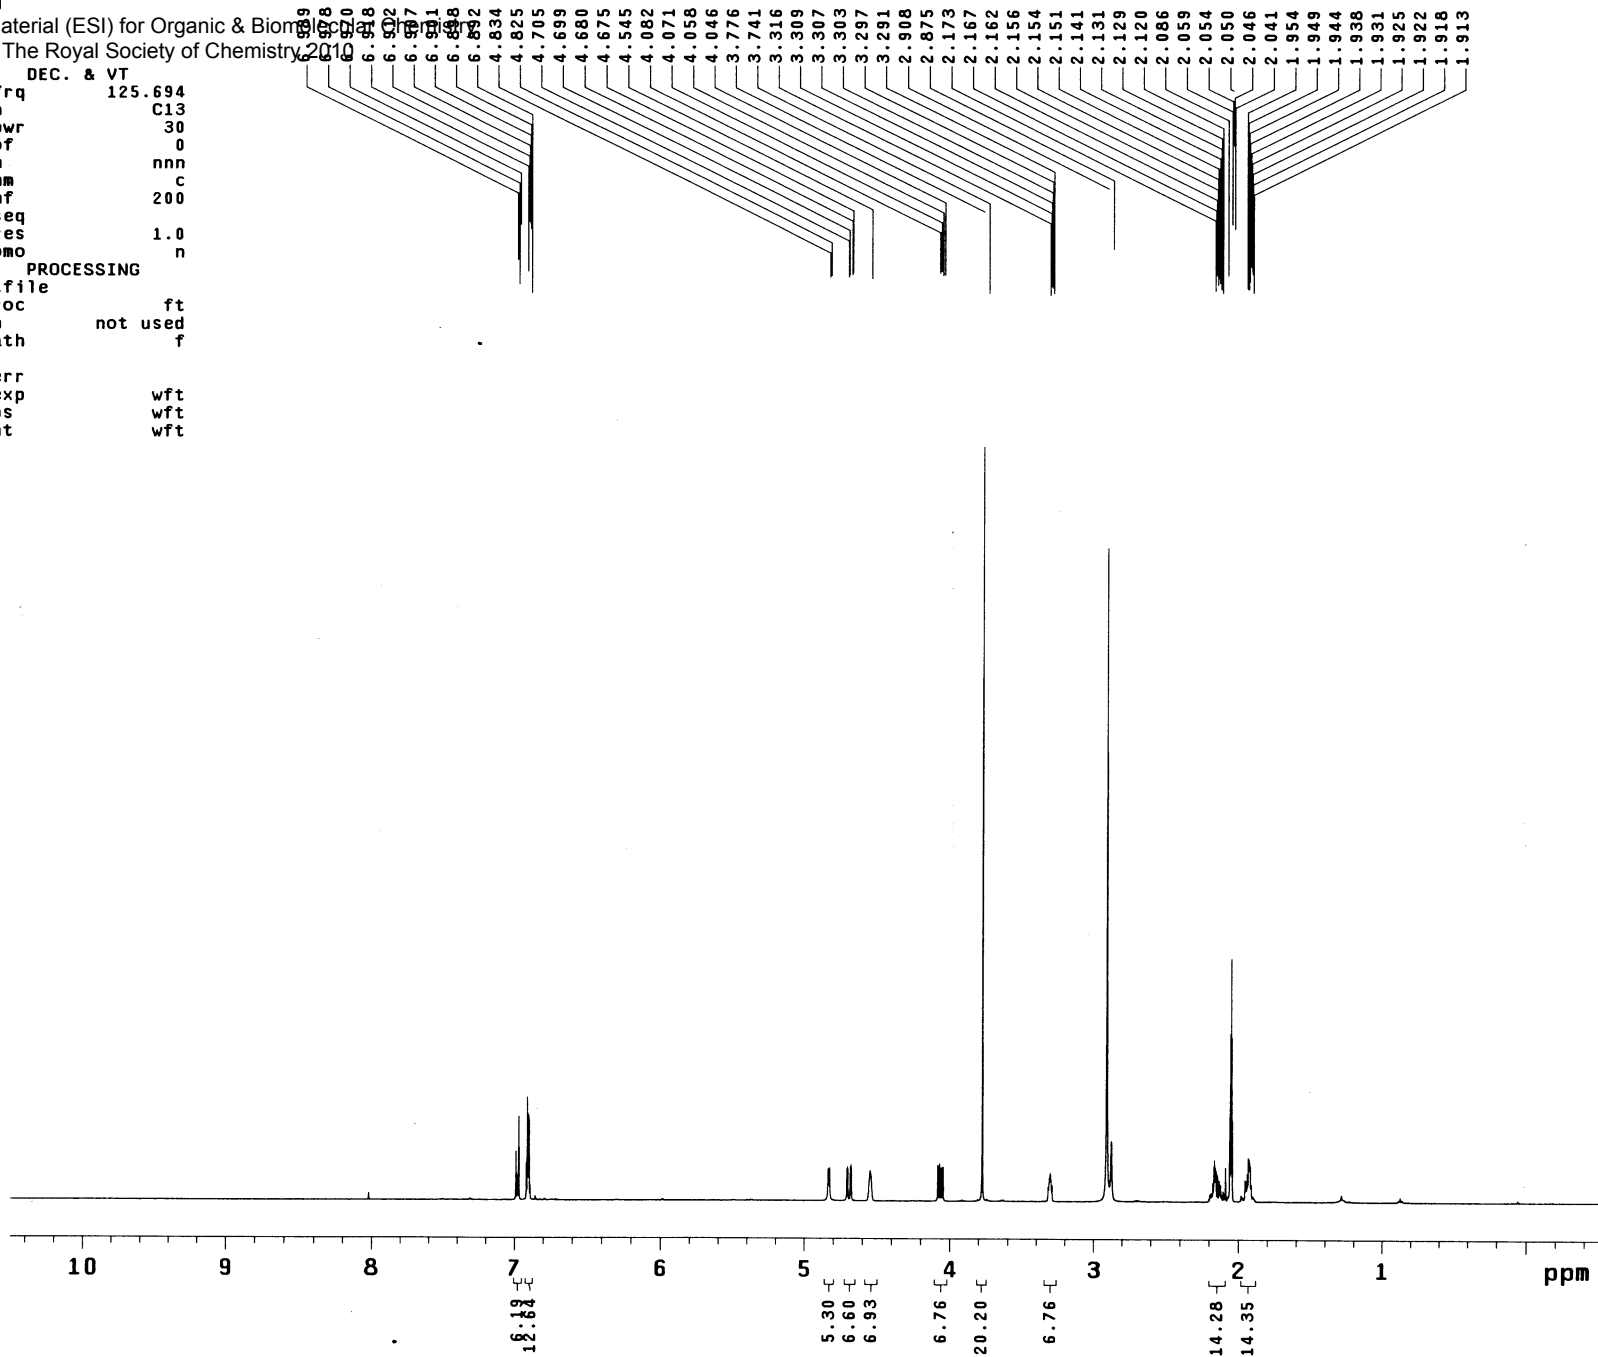

Fig S120. <sup>1</sup>H NMR (acetone-d<sub>6</sub>, 500 MHz) of compound 3o



Fig S121. <sup>13</sup>C NMR (acetone-d<sub>6</sub>, 125 MHz) of compound 3o

# Supplementary Material (ESI) for Organic & Biomolecular Chemistry

# This journal is (c) The Royal Society of Chemistry 2010

PMK-02-406-f1-oxidized

exp14 s2pu1

```

SAMPLE
date Aug 25 2010 dfrq 499.829
solvent cdc13 dn H1
file exp dpwr 39
ACQUISITION dof 0
sfrq 125.696 dm yyy
tn C13 dmm w
at 1.000 dmf 11905
np 62894 dseq
sw 31446.5 dres 1.0
fb not used homo n
bs 16
ss 2
tpwr 54 wtfile 1.00
pw 3.0 proc ft
d1 2.000 fn not used
tof 2512.2 math f
nt 1024
ct 1024 werr react
alock y wexp procplot
gain not used wbs testsn
FLAGS wnt

DISPLAY
sp -1257.2
wp 28906.3
vs 2000
sc 0
wc 210
hzmm 137.65
is 500.00
rfl 5593.9
rfp 3750.4
th 22
ins 100.000
nm cdc ph
  
```

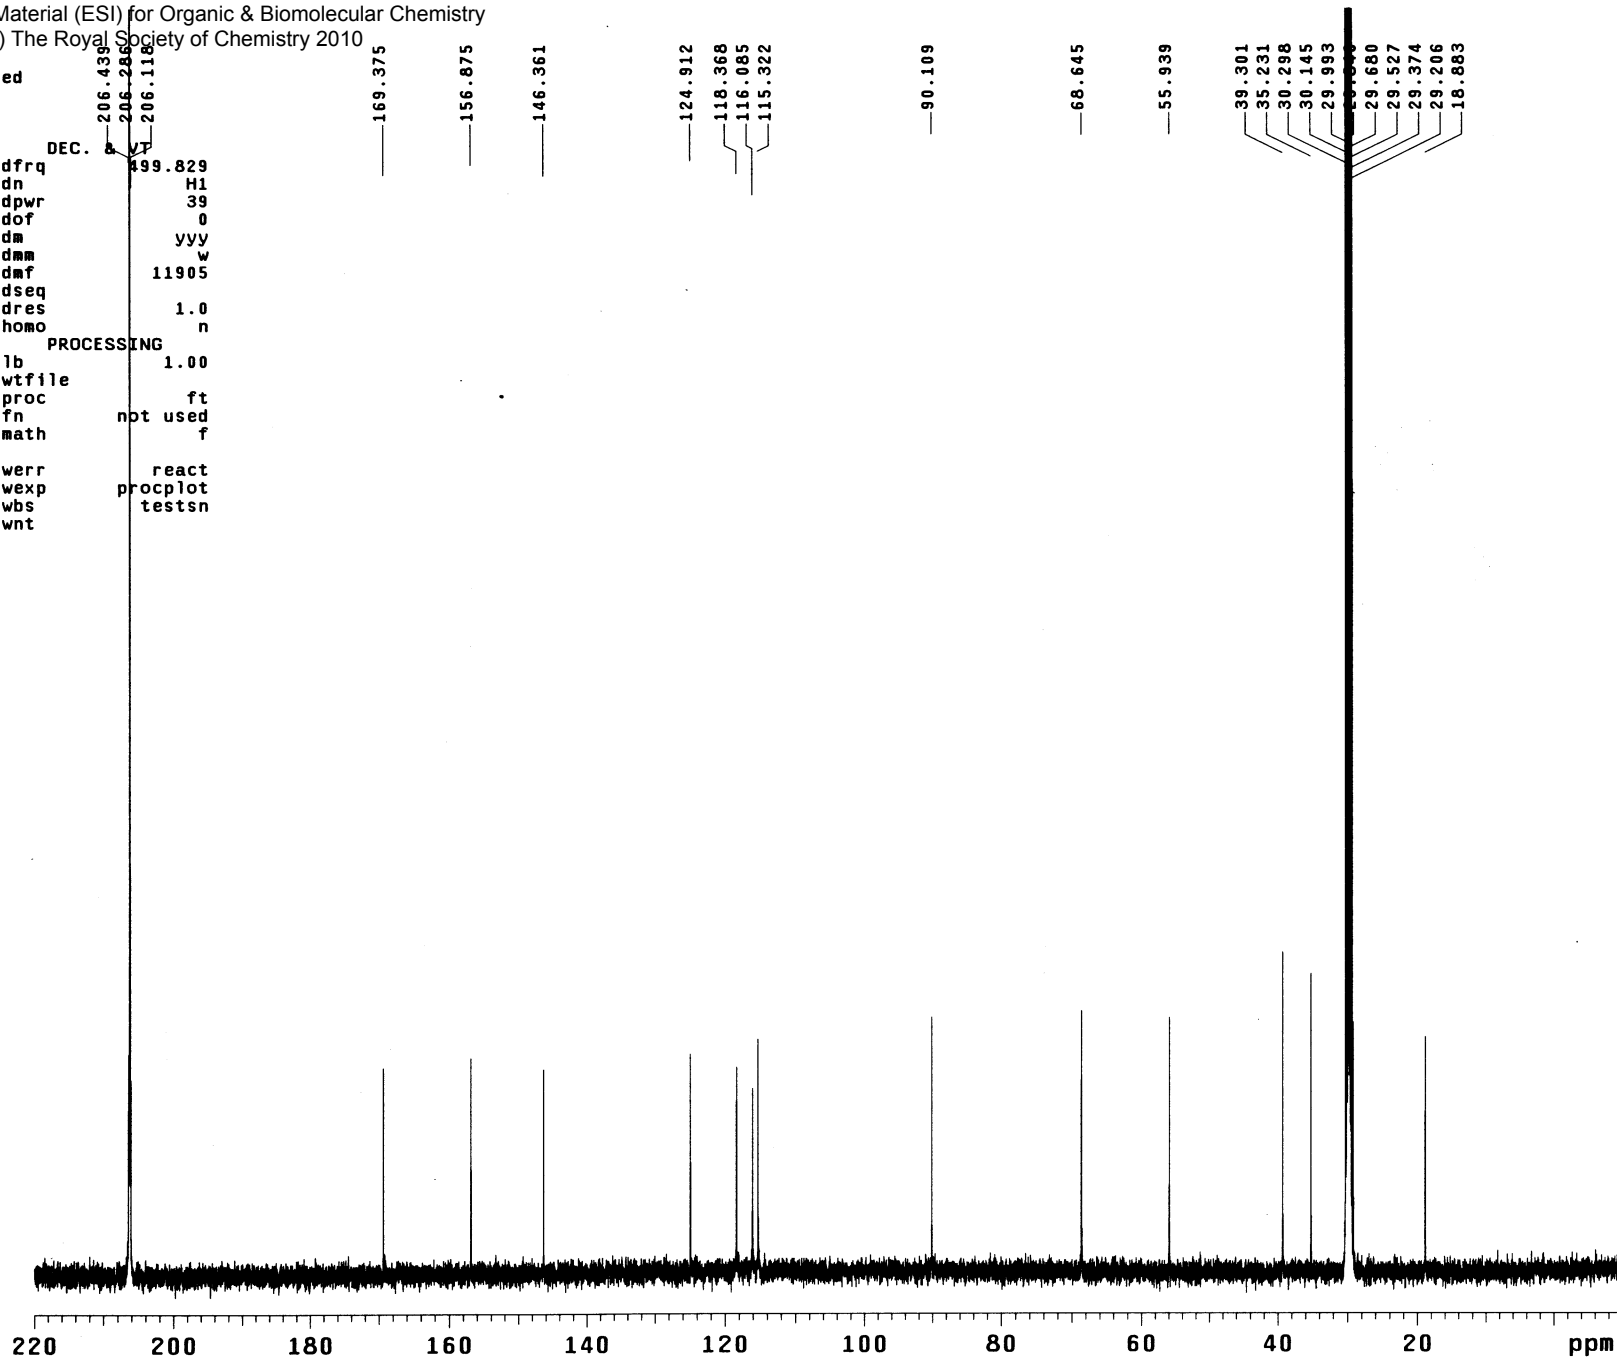

exp14 s2pu1

```
SAMPLE          DEC. & VT
date   Aug 25 2010  dfrq      499.829
solvent cdc13      dn        H1
file    exp       dpwr      39
ACQUISITION
sfrq    125.696   dm        yyy
tn      C13      dmm        w
at      1.000    dmf        11905
np      62894    dseq
sw      31446.5  dres      1.0
fb      not used homo
bs      16      PROCESSING
ss      2       lb        1.00
tpwr    54      wtfile
pw      3.0     proc
d1      2.000   fn        not used
tof     2512.2  math      f
nt      1024
ct      1024   werr      react
alock   y      wexp     procplot
gain    not used wbs      testsn
        FLAGS   wnt
il      n
in      n
dp      y
hs      nn
DISPLAY
sp      3141.9
wp      1256.2
vs      750
sc      0
wc      210
hzmm    5.98
is      500.00
rfl     5593.9
rfp     3750.4
th      10
ins     100.000
nm cdc ph
```

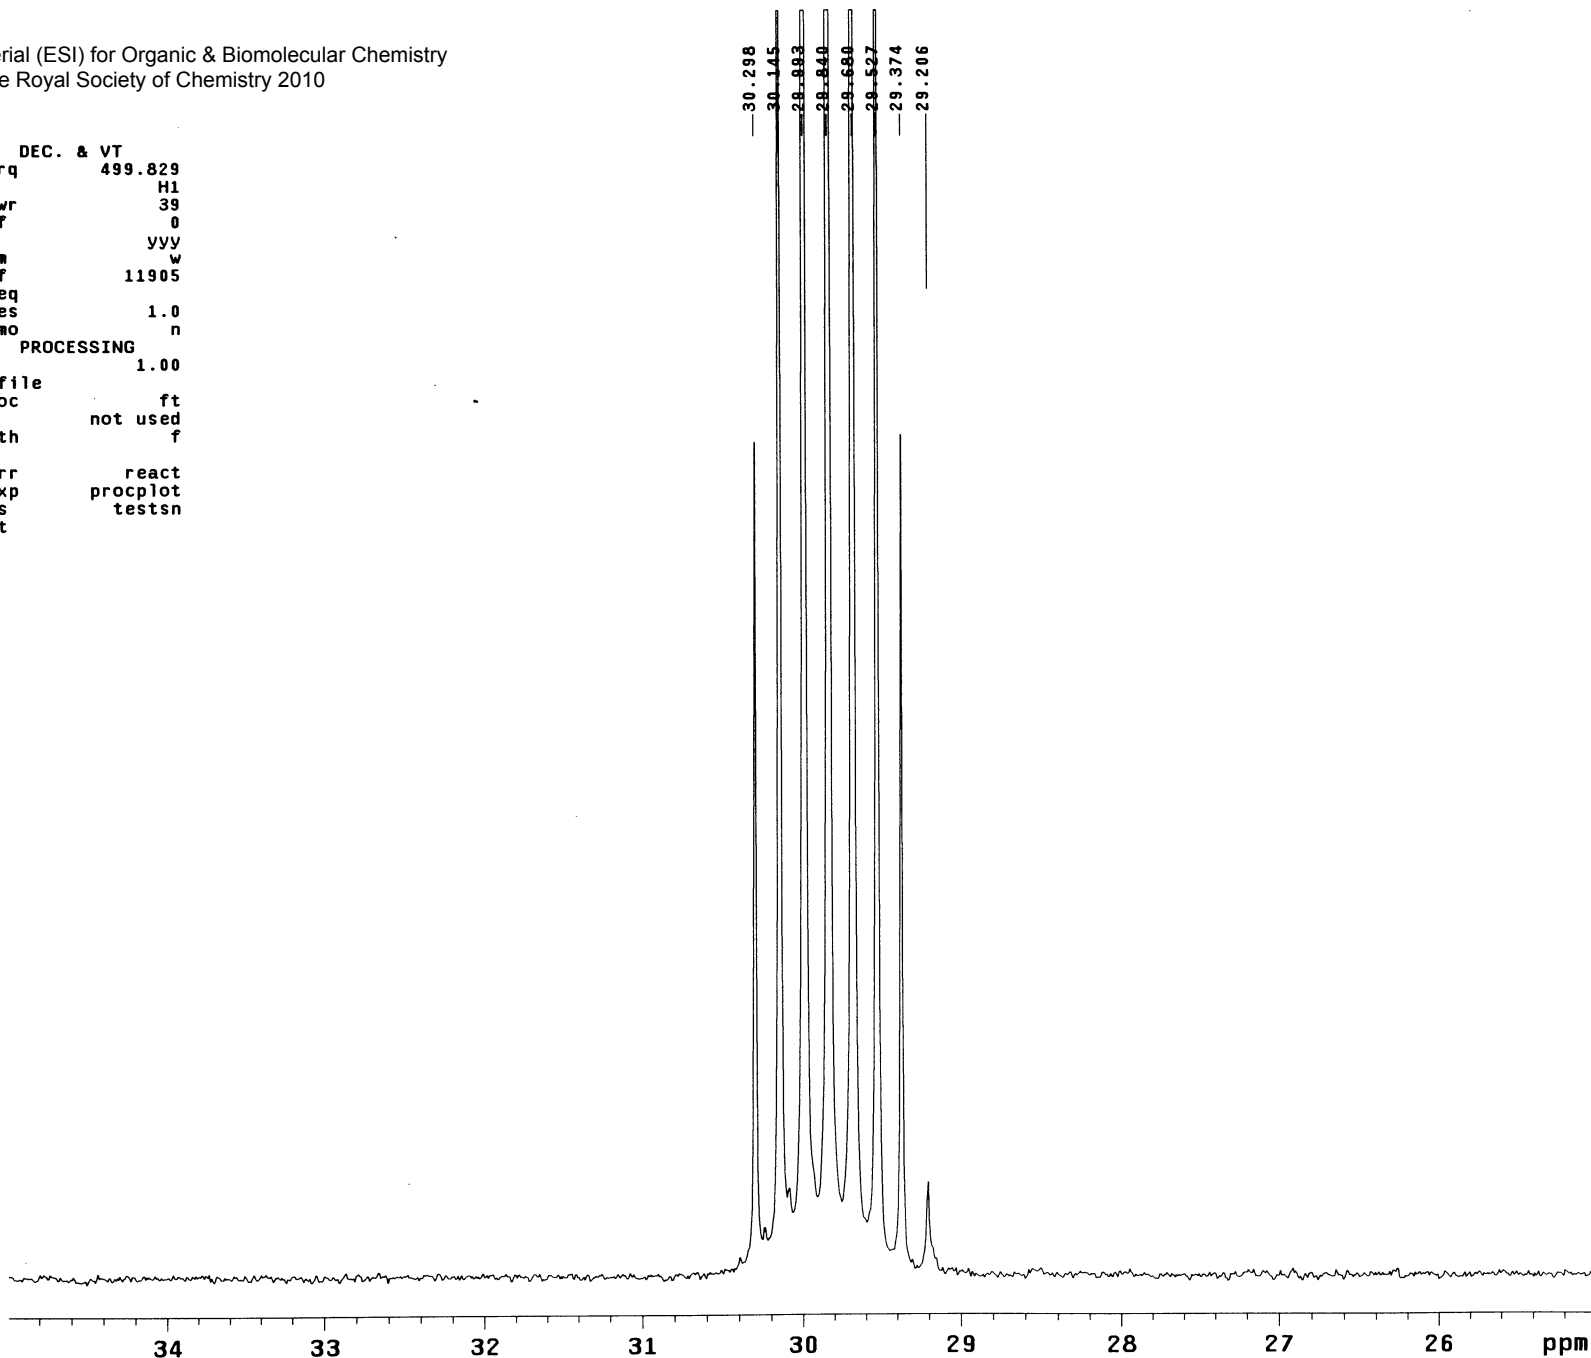

Fig S122. <sup>13</sup>C NMR (acetone-d<sub>6</sub>, 125 MHz) of compound 3o (Expand).

Fig S123. DEPT of compound 3o

# Supplementary Material (ESI) for Organic & Biomolecular Chemistry  
 This journal is © The Royal Society of Chemistry 2010

exp20 DEPT

|             |             |            |          |
|-------------|-------------|------------|----------|
| SAMPLE      |             | DEPT       |          |
| date        | Aug 25 2010 | j1xh       | 140.0    |
| solvent     | Acetone     | mult       | 1.5      |
| sample      | undefined   | SPECIAL    |          |
| ACQUISITION |             | temp       | not used |
| sw          | 31446.5     | gain       | 54       |
| at          | 1.000       | spin       | 0        |
| np          | 62894       | PROCESSING |          |
| bs          | 16          | lb         | 1.00     |
| ss          | -4          | fn         | not used |
| d1          | 1.000       | SPECTRUM   |          |
| nt          | 1024        | wp         | 28906.3  |
| ct          | 1024        | sp         | -1191.0  |
| TRANSMITTER |             | rp         | -1920.4  |
| tn          | C13         | lp         | 195.7    |
| tof         | 2512.2      | ai         | cdc ph   |
| tpwr        | 54          | REFERENCE  |          |
| pw          | 11.500      | rfl        | 1192.0   |
| DECOUPLER   |             | rfp        | 0        |
| dn          | H1          | PLOT       |          |
| dof         | 0           | wc         | 210      |
| dpwr        | 39          | sc         | 0        |
| dm          | nny         | vs         | 500      |
| dmm         | ccw         | hzmm       | 137.65   |
| dmf         | 11905       | th         | 68       |
| pp1v1       | 51          |            |          |
| pp          | 31.000      |            |          |

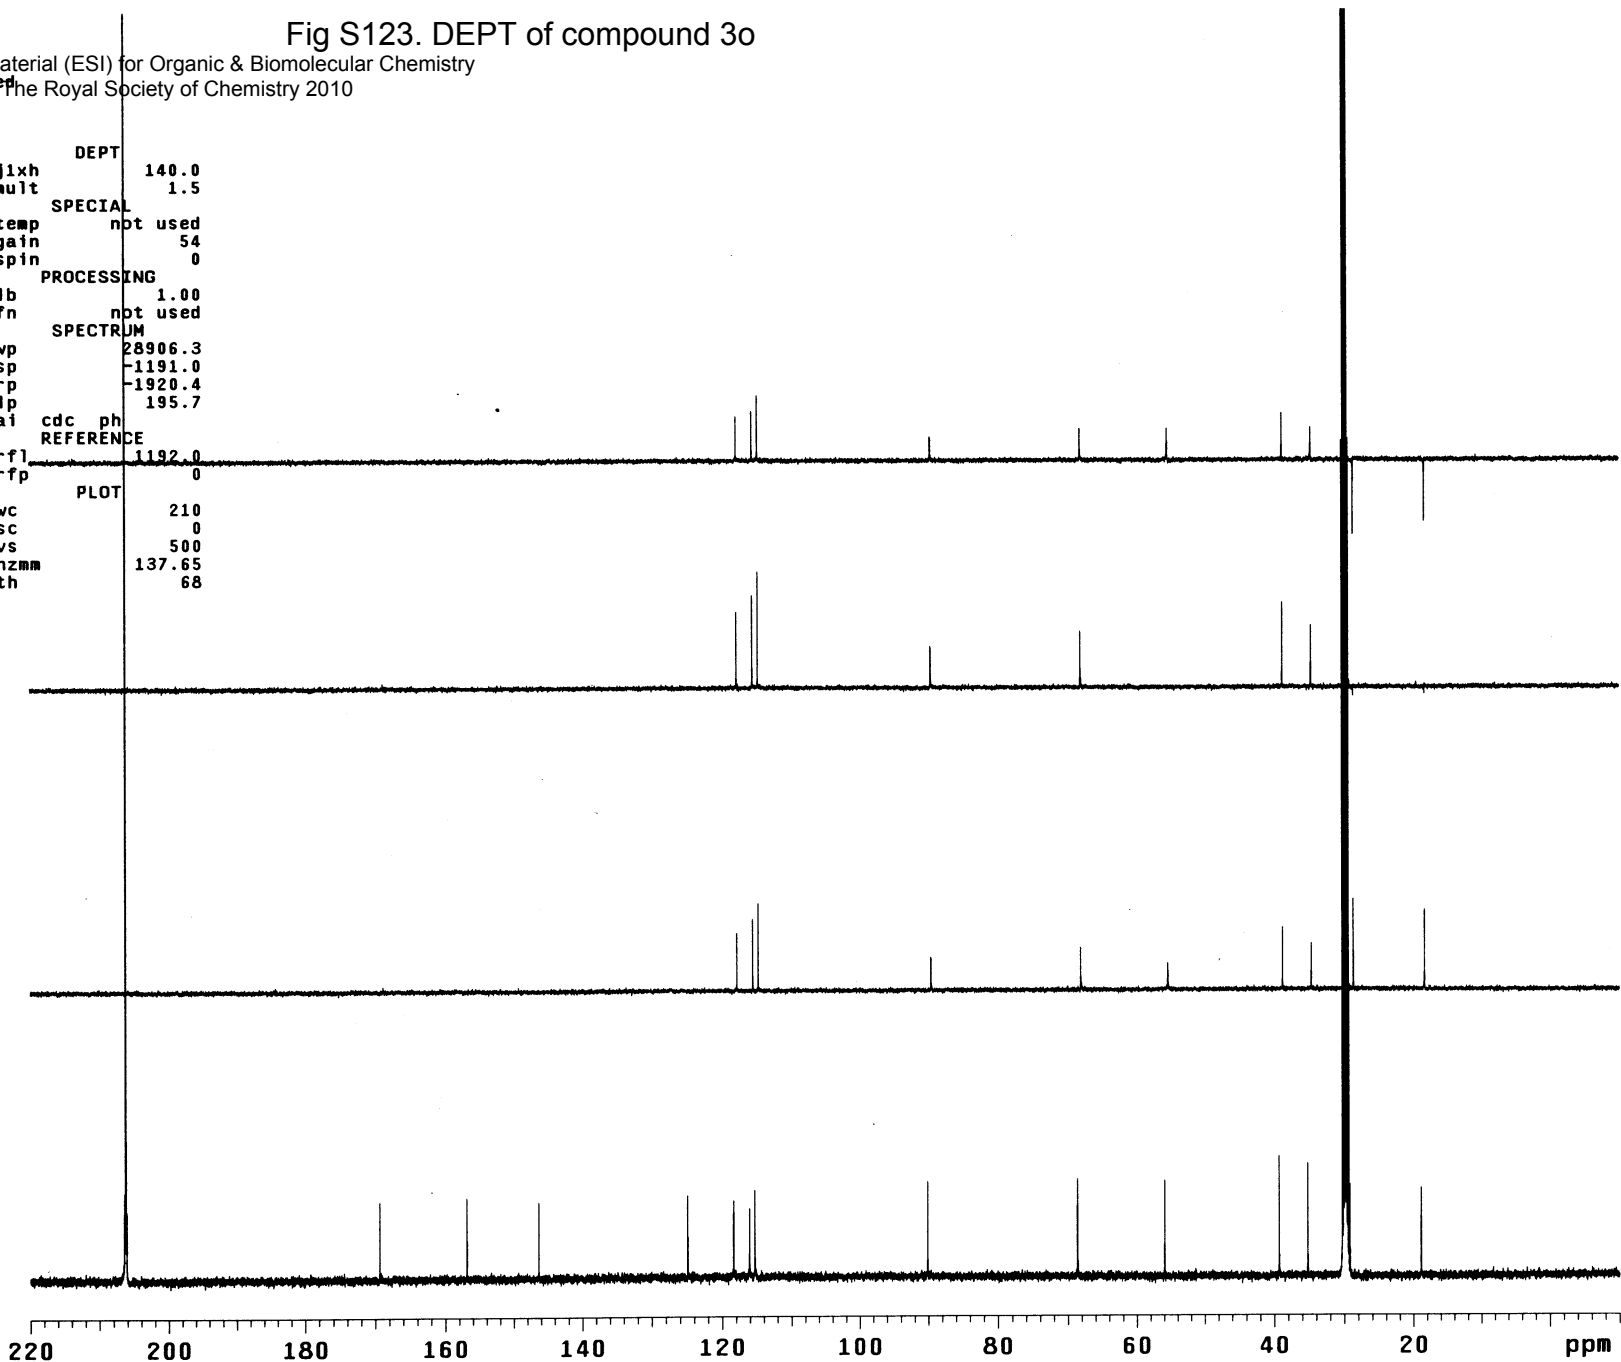

Fig S124. HSQC of compound 3o

PMK-02-406-#Supplementary Material (ESI) for Organic & Biomolecular Chemistry  
 # This journal is (c) The Royal Society of Chemistry 2010  
 exp18 gHSQC

| SAMPLE           | FLAGS         | ACQUISITION | ARRAYS |
|------------------|---------------|-------------|--------|
| date Aug 25 2010 | hs            | n           | phase  |
| solvent Acetone  | sspul         | y           | 256    |
| sample undefined | PFGflg        | y           |        |
| ACQUISITION      | hsglv1        | 1003        | phase  |
| sw 4001.6        | SPECIAL       | 1           | 1      |
| at 0.128         | temp          | not used    | 2      |
| np 1024          | gain          | 20          |        |
| fb not used      | spin          | 0           |        |
| ss 32            | GRADIENTS     |             |        |
| d1 1.000         | gzlv11        | 1003        |        |
| nt 8             | gt1           | 0.002000    |        |
| 2D ACQUISITION   | gzlv13        | 505         |        |
| sw1 21367.5      | gt3           | 0.001000    |        |
| ni 128           | gstab         | 0.000500    |        |
| phase arrayed    | F2 PROCESSING |             |        |
| TRANSMITTER      | gf            | 0.059       |        |
| tn H1            | gfs           | not used    |        |
| sfrq 499.831     | fn            | 1024        |        |
| tof -499.9       | F1 PROCESSING |             |        |
| tpwr 58          | gf1           | 0.006       |        |
| pw 11.100        | gfs1          | not used    |        |
| DECOUPLER        | procl         | lp          |        |
| dn C13           | fn1           | 2448        |        |
| dof -2515.1      | DISPLAY       |             |        |
| dm nny           | sp            | 789.6       |        |
| dmm ccp          | wp            | 2884.0      |        |
| dmf 32258        | sp1           | 1155.3      |        |
| dpwr 36          | wp1           | 15420.5     |        |
| pwxlvl 52        | rf1           | 1894.9      |        |
| pw 14.300        | rffp          | 1887.4      |        |
| HSQC             | rfl1          | 8212.3      |        |
| j1xh 140.0       | rffp1         | 7030.5      |        |
| nullflg y        | PLOT          |             |        |
| mult 2           | wc            | 150.0       |        |
|                  | sc            | 6.2         |        |
|                  | wc2           | 116.2       |        |
|                  | sc2           | 0           |        |
|                  | vs            | 100         |        |
|                  | th            | 5           |        |
|                  | ai cdc ph     |             |        |

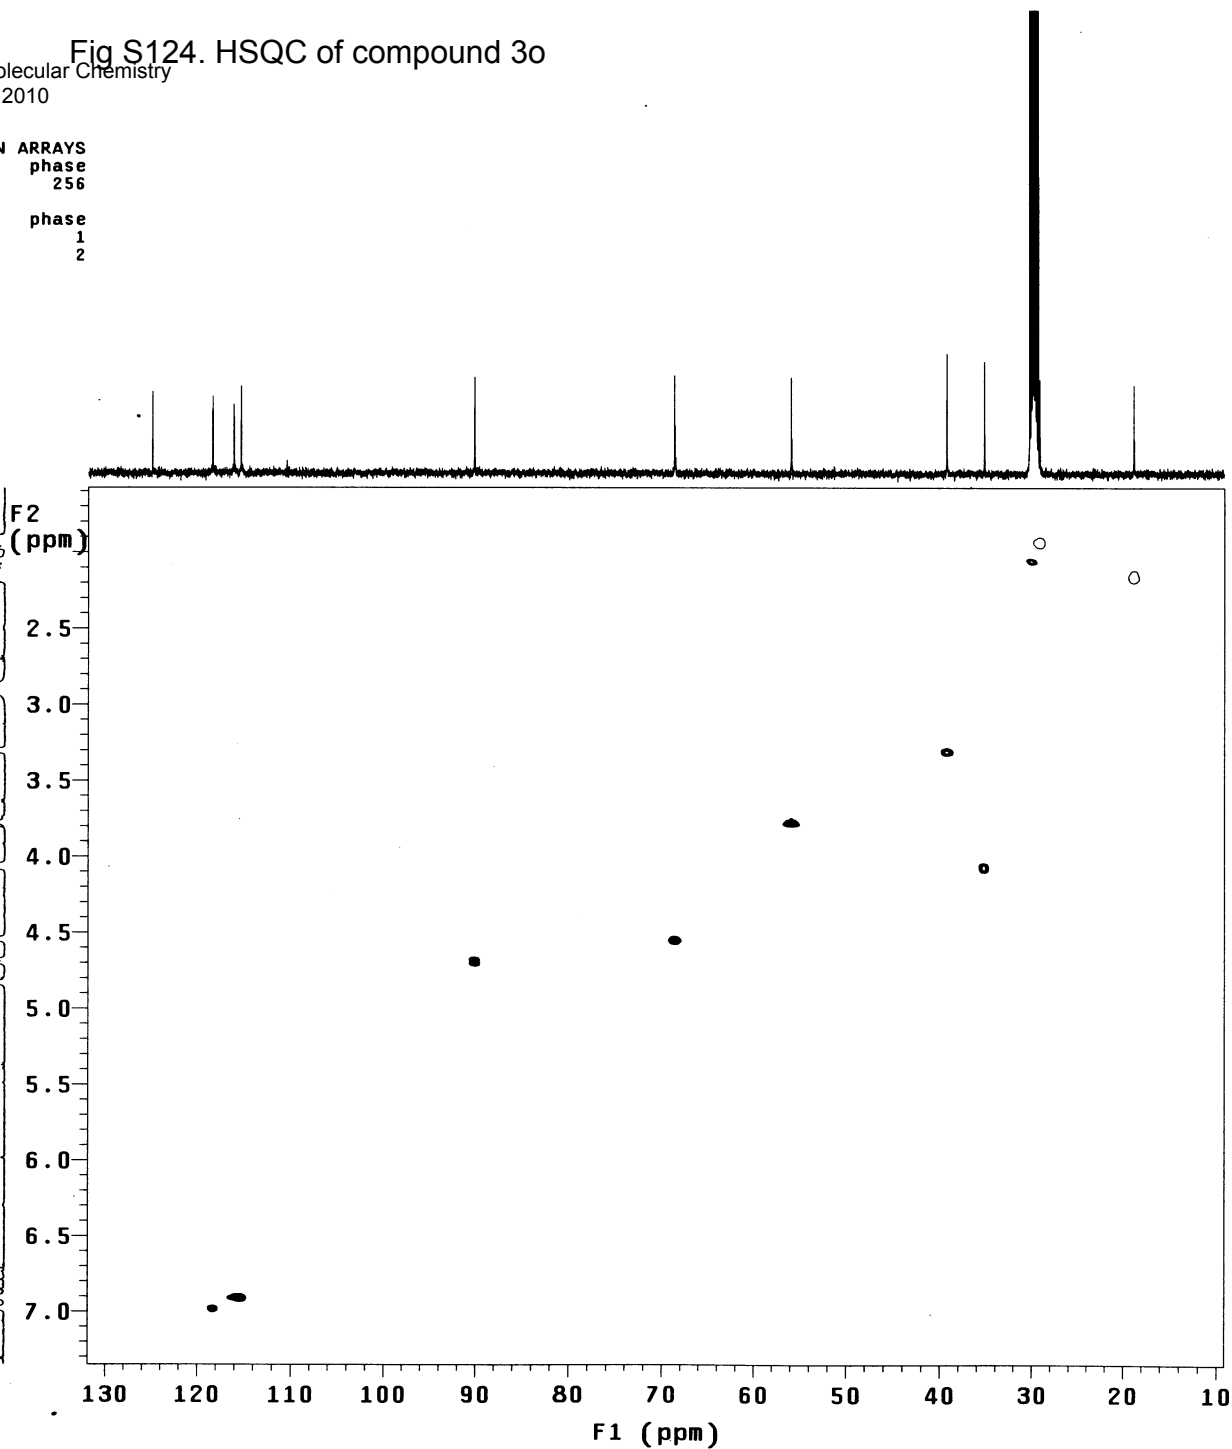

Fig S125. COSY of compound 3o

# Supplementary Material (ESI) for Organic & Biomolecular Chemistry  
 # This journal is (c) The Royal Society of Chemistry 2010

PMK-02-406-f1-oxidized

exp16 gCOSY

| SAMPLE         |             | FLAGS         |          |
|----------------|-------------|---------------|----------|
| date           | Aug 25 2010 | hs            | nn       |
| solvent        | Acetone     | ssp1          | n        |
| sample         | undefined   | hsglv1        | 1003     |
| ACQUISITION    |             | SPECIAL       |          |
| sw             | 4001.6      | temp          | not used |
| at             | 0.128       | gain          | 20       |
| np             | 1024        | spin          | 0        |
| fb             | not used    | F2 PROCESSING |          |
| ss             | 16          | sb            | -0.064   |
| d1             | 1.000       | sbs           | not used |
| nt             | 8           | fn            | 1024     |
| 2D ACQUISITION |             | F1 PROCESSING |          |
| sw1            | 4001.6      | sb1           | -0.032   |
| ni             | 128         | sbs1          | not used |
| TRANSMITTER    |             | DISPLAY       |          |
| tn             | H1          | fn1           | 1024     |
| sfrq           | 499.831     | sp            | 816.9    |
| tof            | -499.9      | wp            | 2774.5   |
| tpwr           | 58          | sp1           | 819.0    |
| pw             | 11.100      | wp1           | 2774.5   |
| GRADIENTS      |             | rf1           | 1898.9   |
| gzlv11         | 1003        | rfl           | 1887.4   |
| gt1            | 0.001000    | rfl1          | 1896.8   |
| gstab          | 0.000500    | rfl1          | 1887.3   |
| DECOUPLER      |             | PLOT          |          |
| dn             | C13         | wc            | 155.0    |
| dm             | nnn         | sc            | 10.0     |
|                |             | wc2           | 155.0    |
|                |             | sc2           | 0        |
|                |             | vs            | 100      |
|                |             | th            | 8        |
|                |             | ai            | cdc av   |

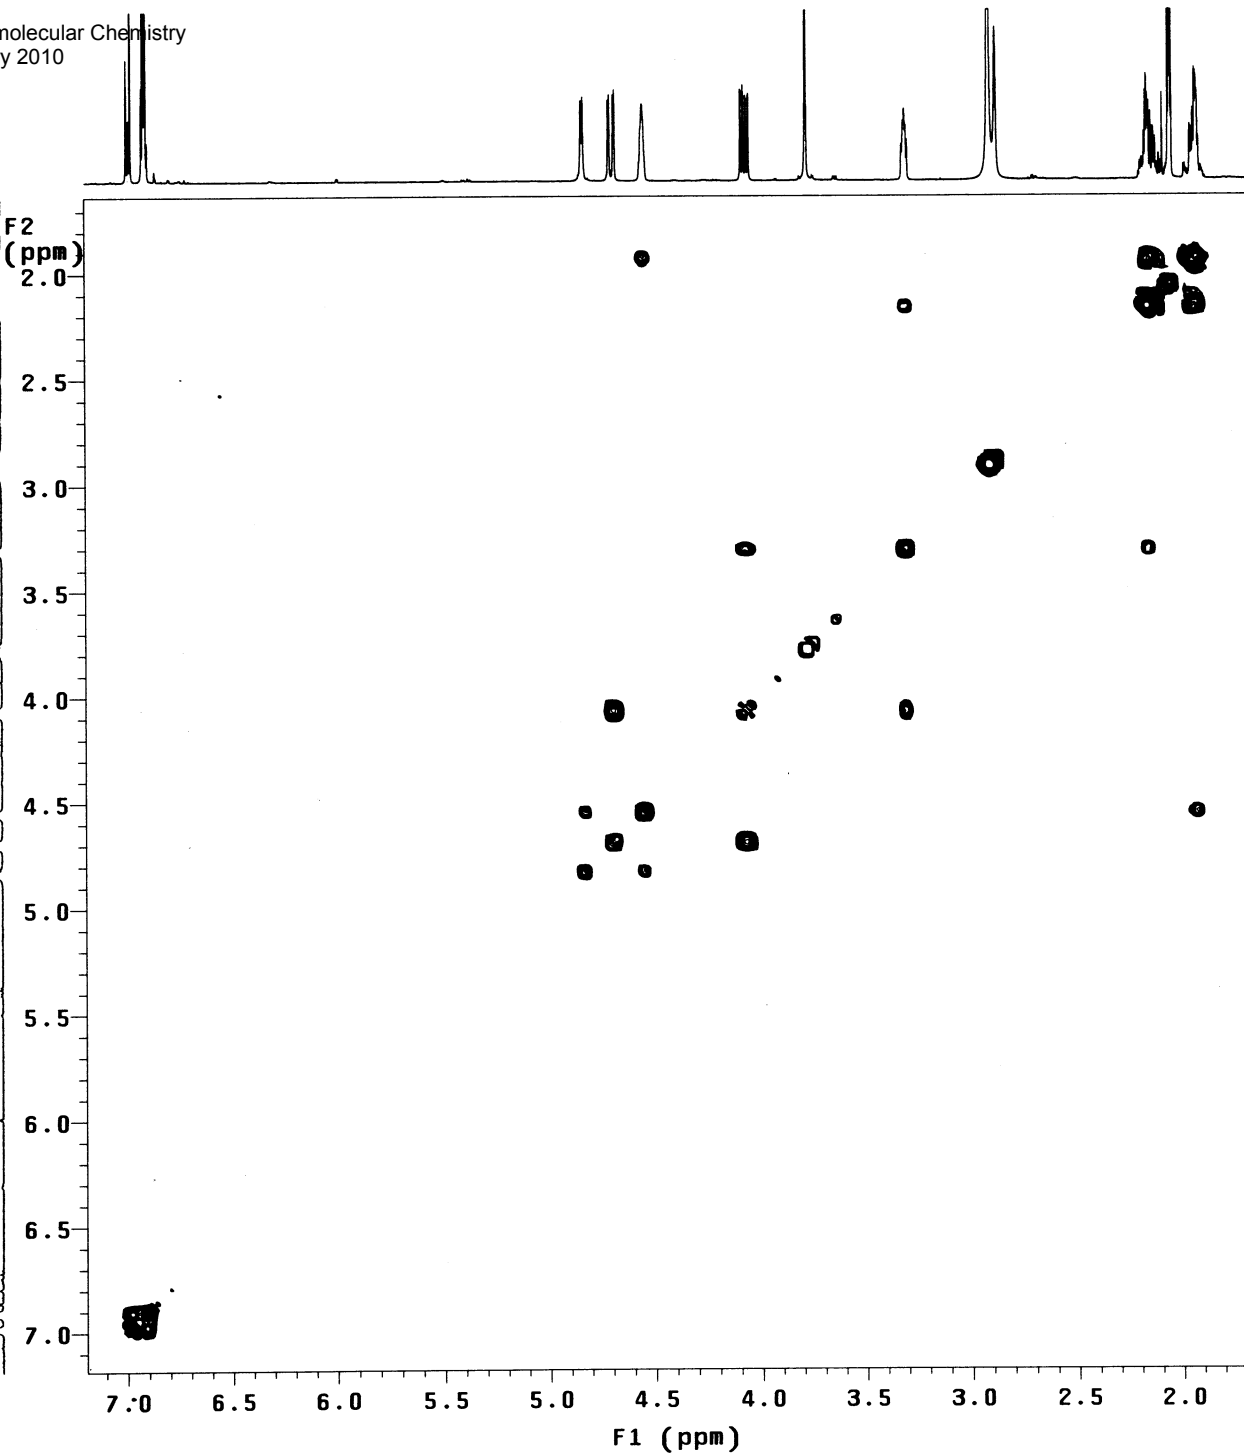

Fig S126. NOESY of compound 3o

# Supplementary Material (ESI) for Organic & Biomolecular Chemistry  
 # This journal is (c) The Royal Society of Chemistry 2010  
 exp17 NOESY

| SAMPLE         |             | FLAGS         |          |
|----------------|-------------|---------------|----------|
| date           | Aug 25 2010 | hs            | n        |
| solvent        | Acetone     | sspul         | y        |
| sample         | undefined   | PFGflg        | y        |
| ACQUISITION    |             | hsglvl        | 1003     |
| sw             | 4001.6      | SPECIAL       |          |
| at             | 0.128       | temp          | not used |
| np             | 1024        | gain          | 28       |
| fb             | not used    | spin          | 0        |
| ss             | 32          | F2 PROCESSING |          |
| d1             | 1.000       | gf            | 0.059    |
| nt             | 8           | gfs           | not used |
| 2D ACQUISITION |             | fn            | 1024     |
| sw1            | 4001.6      | F1 PROCESSING |          |
| ni             | 200         | gf1           | 0.046    |
| TRANSMITTER    |             | gfs1          | not used |
| tn             | H1          | proci         | lp       |
| sfrq           | 499.831     | fn1           | 1024     |
| tof            | -499.9      | DISPLAY       |          |
| tpwr           | 58          | sp            | 816.9    |
| pw             | 11.100      | wp            | 2805.8   |
| NOESY          |             | sp1           | 809.5    |
| mix            | 0.600       | wp1           | 2805.8   |
| PRESATURATION  |             | rfl           | 1898.9   |
| satmode        | nnnn        | rfp           | 1887.4   |
| satpwr         | 0           | rf11          | 1898.5   |
| satdly         | 0           | rfp1          | 1887.3   |
| satfrq         | 0           | PLOT          |          |
| DECOUPLER      |             | wc            | 155.0    |
| dn             | C13         | sc            | 10.0     |
| dm             | nnn         | wc2           | 155.0    |
|                |             | sc2           | 0        |
|                |             | vs            | 100      |
|                |             | th            | 1        |
|                |             | ai            | ph       |

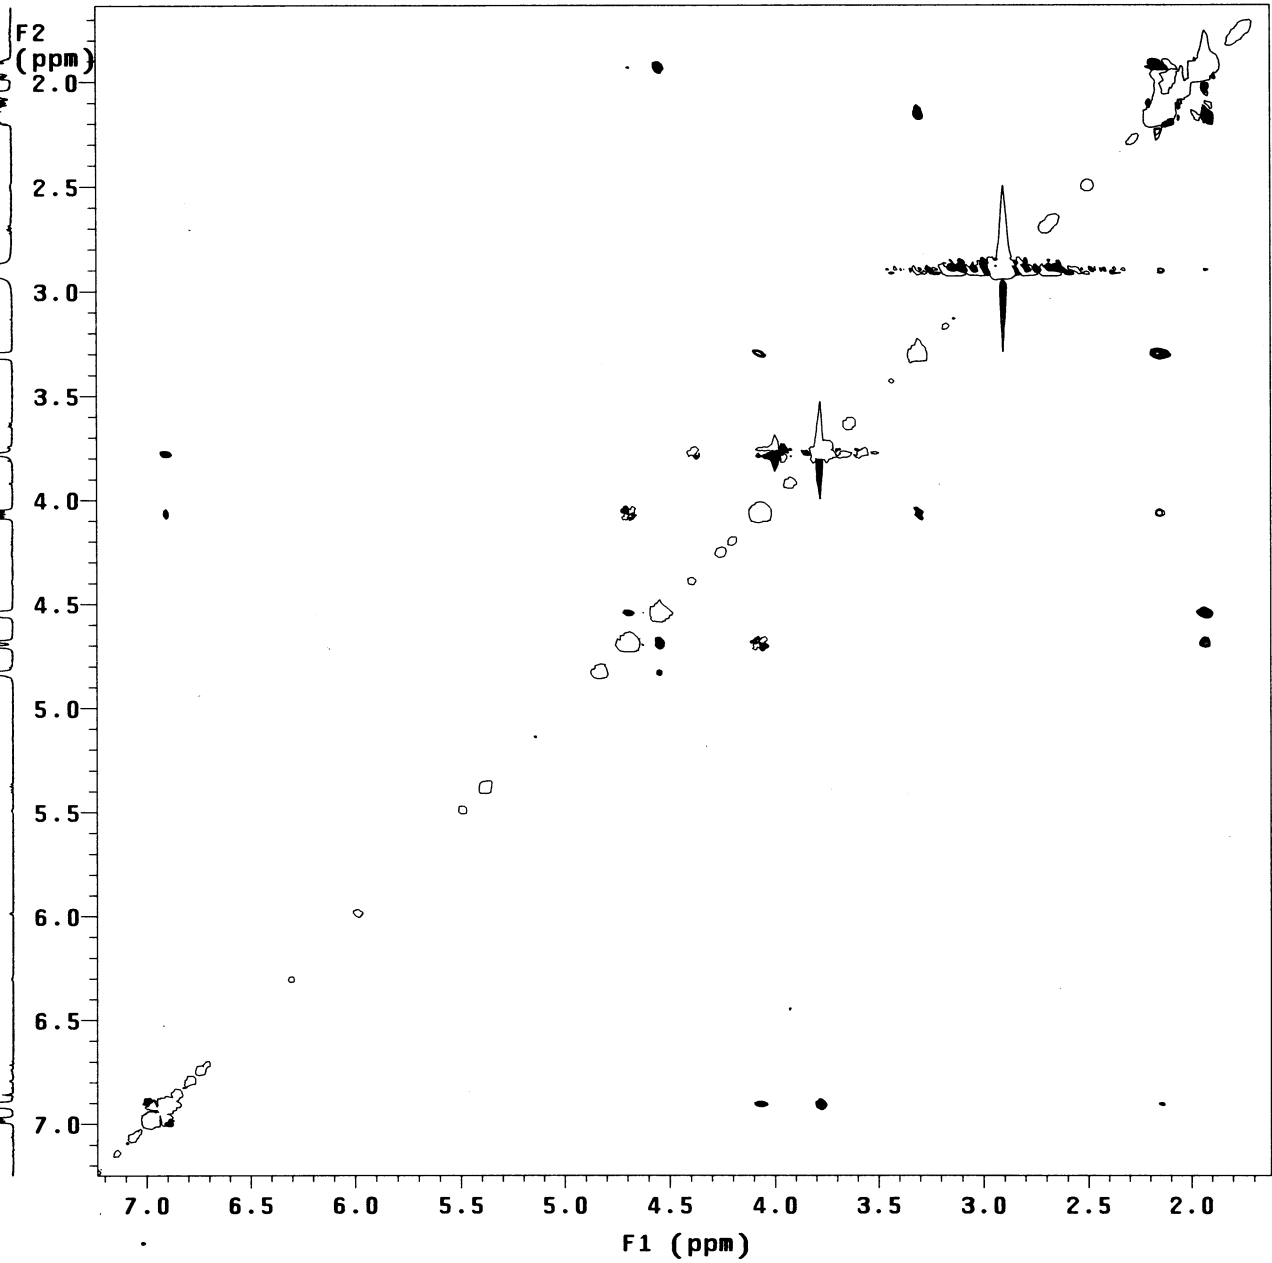

# Supplementary Material (ESI) for Organic & Biomolecular Chemistry  
 # This journal is (c) The Royal Society of Chemistry 2010

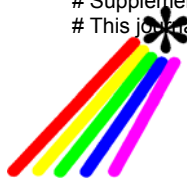

# Chromatogram Report

PMK-02-340-racemate-colm-IA-8%ipa/hex

Report produced on 2010/3/19 at 上午 11:00:51 by Put your name here

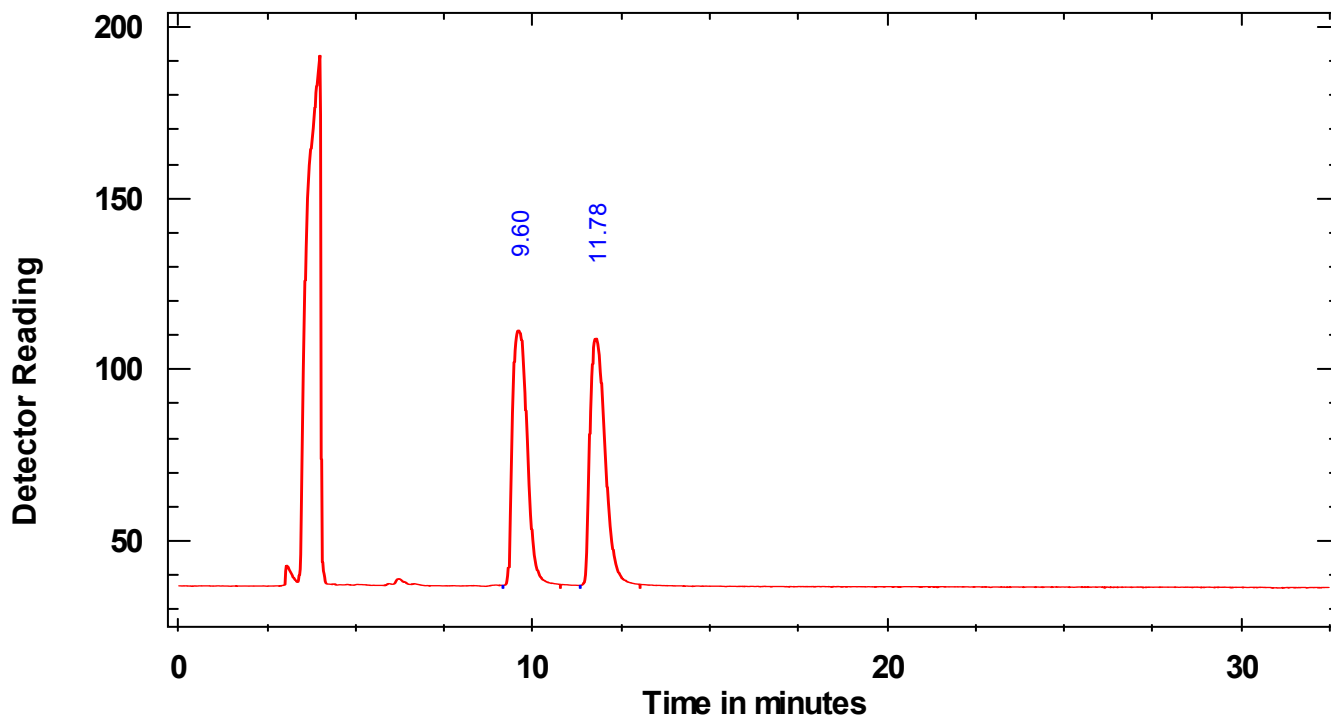

2010/3/19 上午 10:27:29 Flow set to 1.00 at 0.00 minutes

2010/3/19 上午 11:00:01 Run stopped by operator

## PEAK REPORT

| # | begin | end   | area | percent | maximum | time  | begins as | name |
|---|-------|-------|------|---------|---------|-------|-----------|------|
| 1 | 9.15  | 10.78 | 2146 | 49.9    | 111.14  | 9.60  | Baseline  |      |
| 2 | 11.34 | 13.03 | 2151 | 50.1    | 108.96  | 11.78 | Baseline  |      |



# Chromatogram Report

PMK-02-336-chiral-colm-IA-8%ipa/hex

Report produced on 2010/3/19 at 上午 11:44:07 by Put your name here

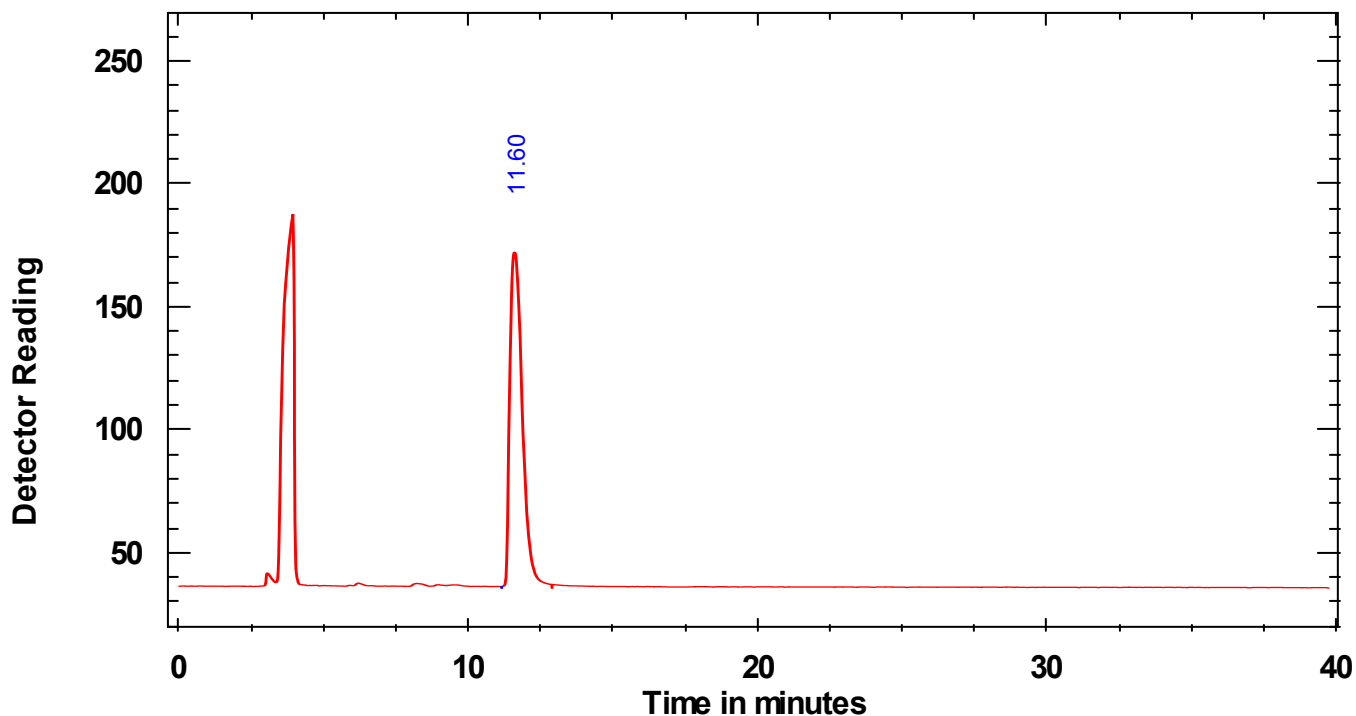

2010/3/19 上午 11:03:54 Flow set to 1.00 at 0.00 minutes

2010/3/19 上午 11:43:43 Run stopped by operator

## PEAK REPORT

| # | begin | end   | area | percent | maximum | time  | begins as | name |
|---|-------|-------|------|---------|---------|-------|-----------|------|
| 1 | 11.16 | 12.90 | 4041 | 100.0   | 172.09  | 11.60 | Baseline  |      |



(For comparison, Table 2, entry 1)

# Supplementary Material (ESI) for Organic & Biomolecular Chemistry

# This journal is (c) The Royal Society of Chemistry 2010

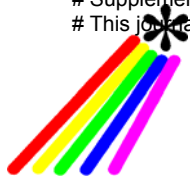

## Peak Report

PMK-02-336-chiral+racemate-collm-IA-8%ipa/hex

Report produced on 2010/3/19 at 下午 01:26:19 by Put your name here

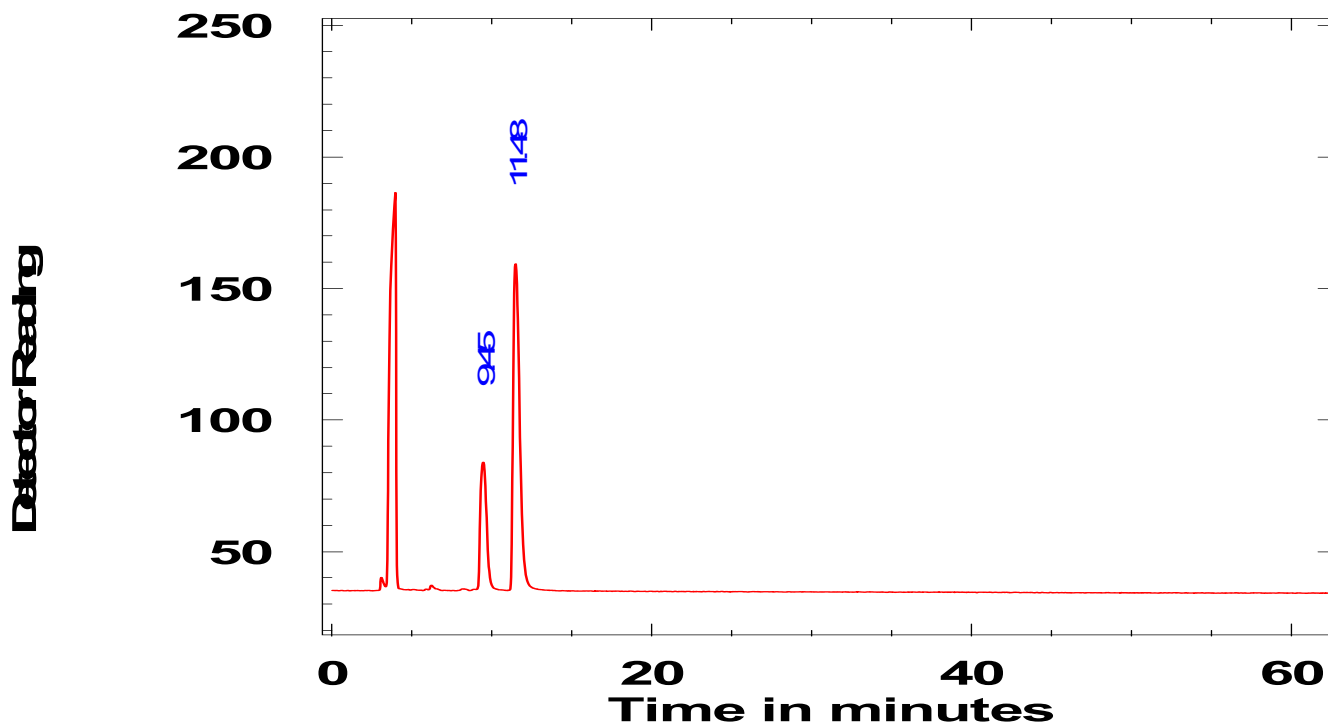

| Peak # | Begin | End   | Peak Area | Maximum | Time  | Area % | Begins as |
|--------|-------|-------|-----------|---------|-------|--------|-----------|
| 1      | 8.68  | 10.42 | 1322      | 83.91   | 9.45  | 27.3   | Baseline  |
| 2      | 11.02 | 12.73 | 3519      | 159.29  | 11.48 | 72.7   | Baseline  |

(For comparison, Table 2, entry 2)

# Supplementary Material (ESI) for Organic & Biomolecular Chemistry

# This journal is (c) The Royal Society of Chemistry 2010



# Peak Report

PMK-02-364-racemate-colm-OD-6%ipa/Hex

Report produced on 2010/7/16 at 下午 05:44:16 by Put your name here

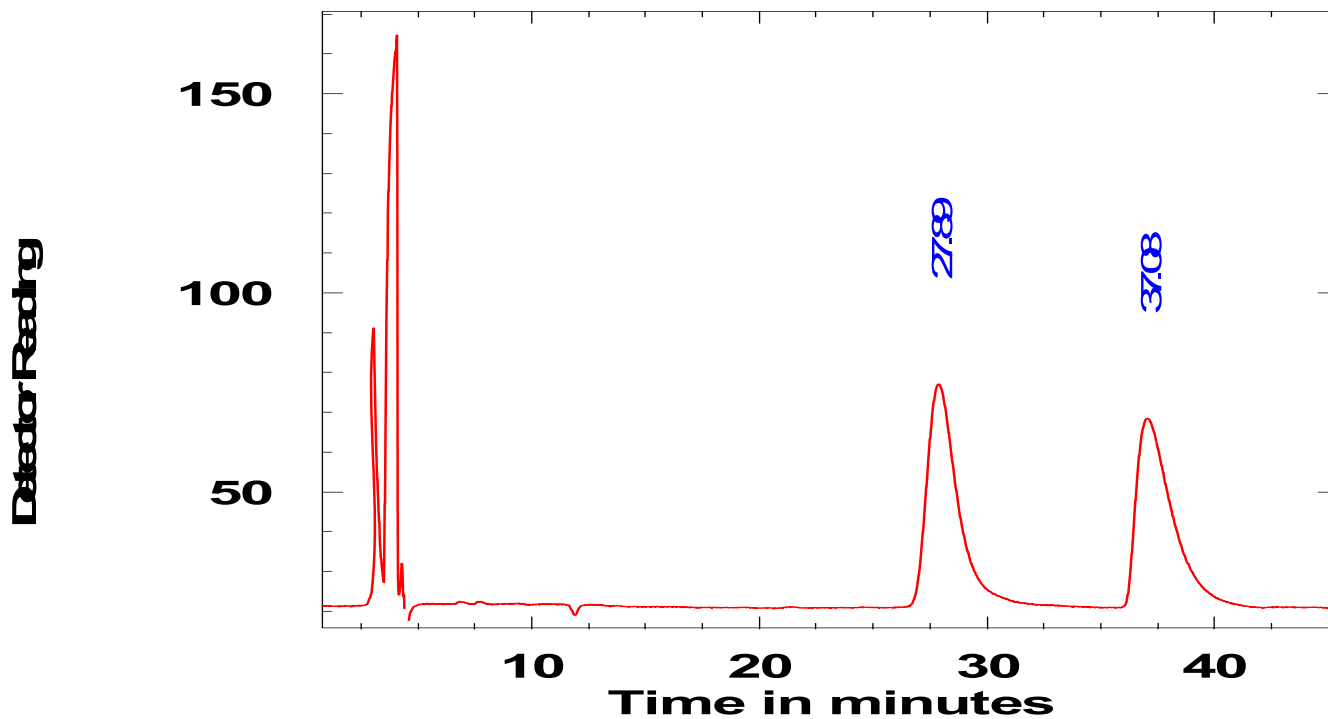

| Peak # | Begin | End   | Peak Area | Maximum | Time  | Area % | Begins as |
|--------|-------|-------|-----------|---------|-------|--------|-----------|
| 1      | 26.55 | 31.12 | 5008      | 77.07   | 27.89 | 50.7   | Baseline  |
| 2      | 36.14 | 41.26 | 4874      | 68.42   | 37.08 | 49.3   | Baseline  |

Fig S131. HPLC analysis of compound 3b obtained. (Table 2, entry 2)

# Supplementary Material (ESI) for Organic & Biomolecular Chemistry  
# This journal is (c) The Royal Society of Chemistry 2010

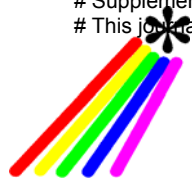

## Peak Report

PMK-02-364-Chiral-colm-OD-6%ipa/Hex

Report produced on 2010/7/16 at 下午 05:49:10 by Put your name here

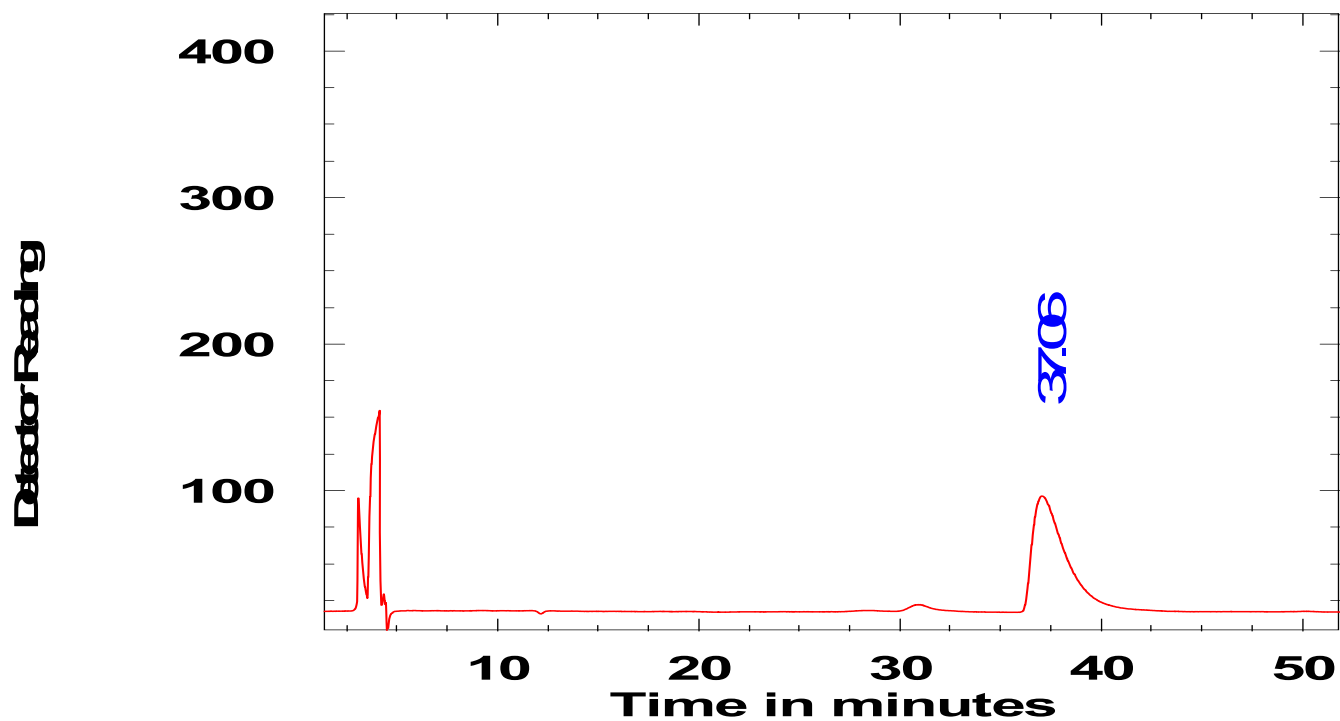

| Peak # | Begin | End   | Peak Area | Maximum | Time  | Area % | Begins as |
|--------|-------|-------|-----------|---------|-------|--------|-----------|
| 1      | 35.88 | 41.28 | 8854      | 96.16   | 37.06 | 100.0  | Baseline  |

(For comparison, Table 2, entry 2)  
# Supplementary Material (ESI) for Organic & Biomolecular Chemistry  
# This journal is (c) The Royal Society of Chemistry 2010



## Peak Report

PMK-02-364-Chiral+racemate-colm-OD-6%ipa/Hex

Report produced on 2010/7/16 at 下午 05:46:45 by Put your name here

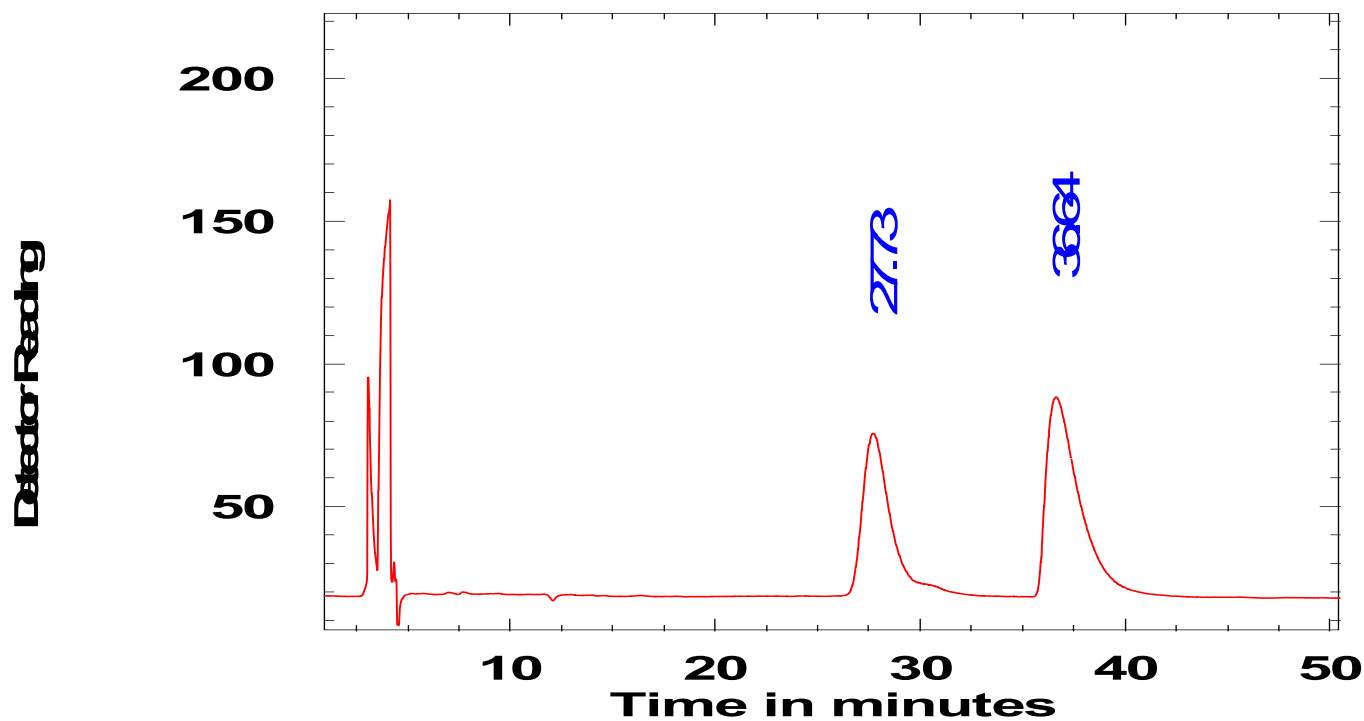

| Peak # | Begin | End   | Peak Area | Maximum | Time  | Area % | Begins as |
|--------|-------|-------|-----------|---------|-------|--------|-----------|
| 1      | 26.68 | 29.40 | 4120      | 75.59   | 27.73 | 34.2   | Baseline  |
| 2      | 35.14 | 42.79 | 7942      | 88.31   | 36.64 | 65.8   | Baseline  |

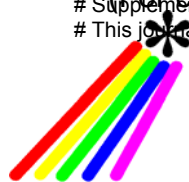

# Peak Report

PMK-02-365-racemate-colm-OD-10%ipa/Hex

Report produced on 2010/7/17 at 下午 04:27:56 by Put your name here

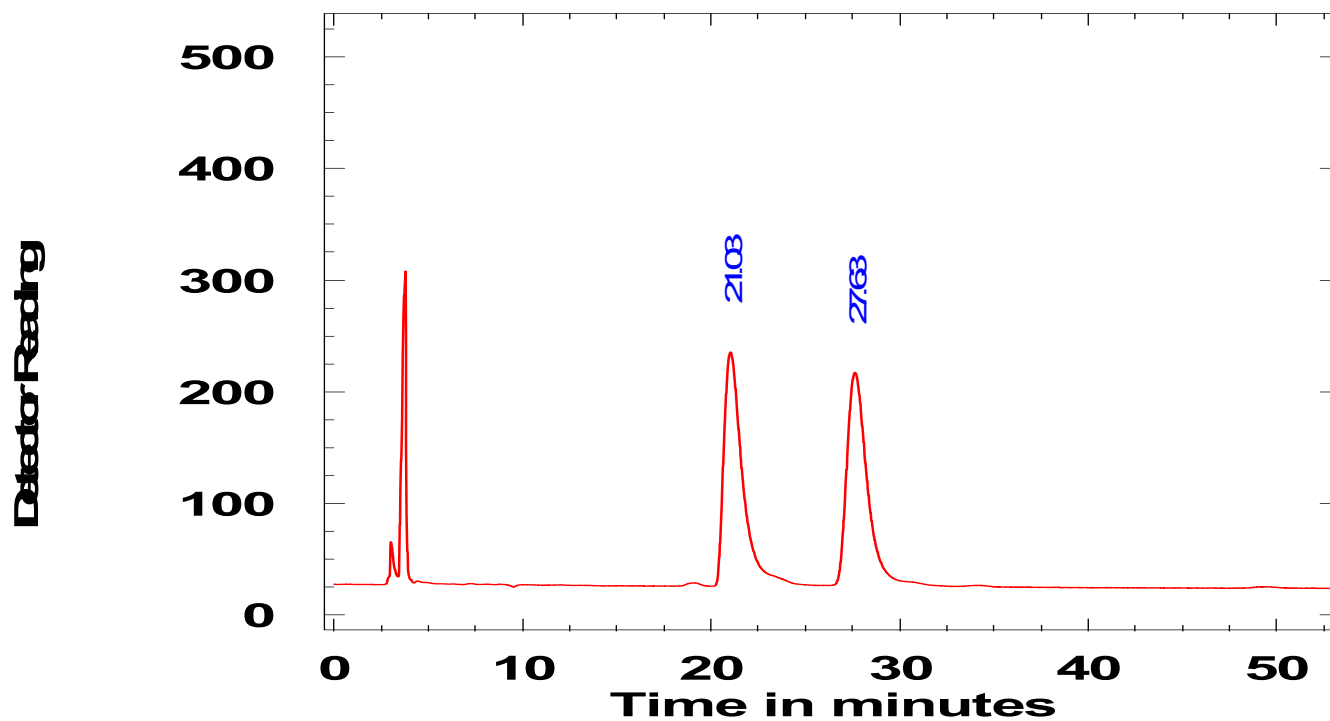

| Peak # | Begin | End   | Peak Area | Maximum | Time  | Area % | Begins as |
|--------|-------|-------|-----------|---------|-------|--------|-----------|
| 1      | 20.18 | 24.02 | 13992     | 235.50  | 21.03 | 50.6   | Baseline  |
| 2      | 26.63 | 30.86 | 13674     | 217.21  | 27.63 | 49.4   | Baseline  |

Fig S134. HPLC analysis of compound 3c obtained. (Table 2, entry 3)

# Supplementary Material (ESI) for Organic & Biomolecular Chemistry  
# This journal is (c) The Royal Society of Chemistry 2010

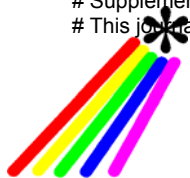

# Peak Report

PMK-02-365-chiral-colm-OD-10%ipa/Hex

Report produced on 2010/7/17 at 下午 04:26:18 by Put your name here

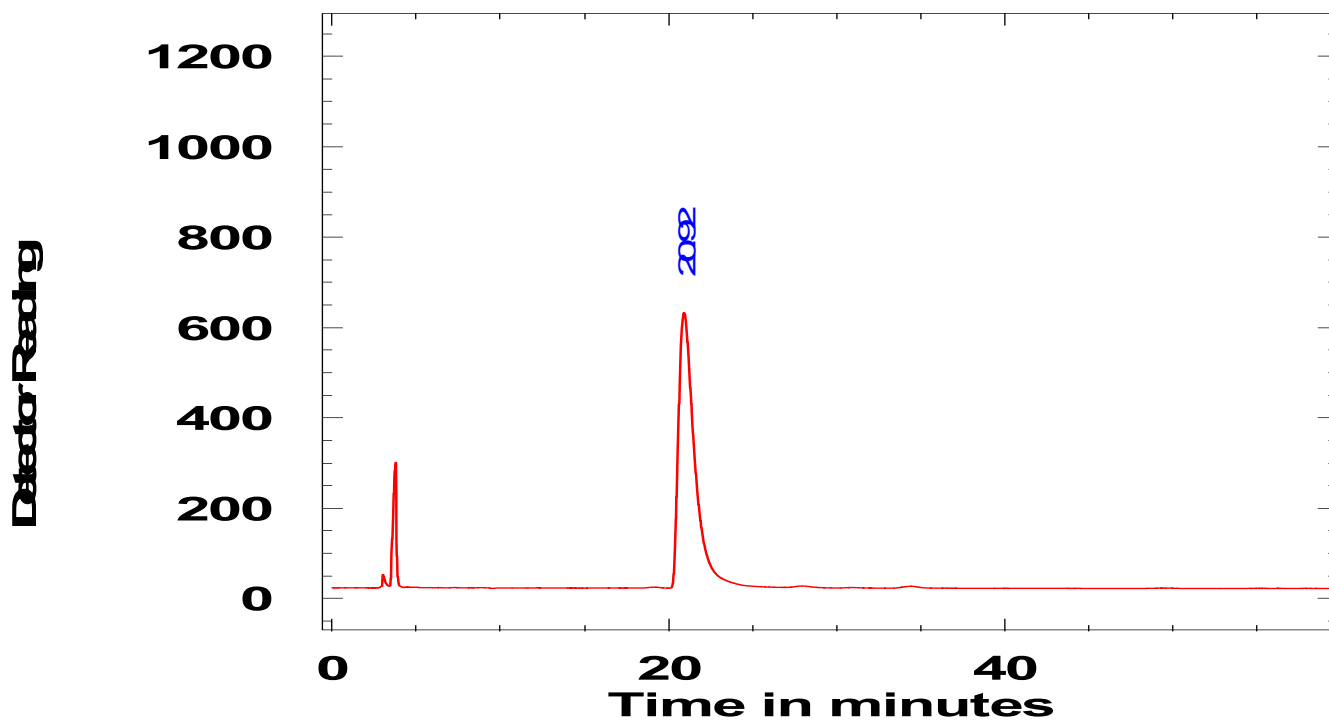

| Peak # | Begin | End   | Peak Area | Maximum | Time  | Area % | Begins as |
|--------|-------|-------|-----------|---------|-------|--------|-----------|
| 1      | 20.28 | 24.92 | 37595     | 632.83  | 20.92 | 100.0  | Baseline  |

(For comparison, Table 2, entry 3)

# Supplementary Material (ESI) for Organic & Biomolecular Chemistry

# This journal is (c) The Royal Society of Chemistry 2010

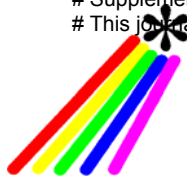

# Chromatogram Report

PMK-02-365-chiral+racemate-colum-OD-10%ipa/Hex

Report produced on 2010/7/17 at 下午 04:23:12 by Put your name here

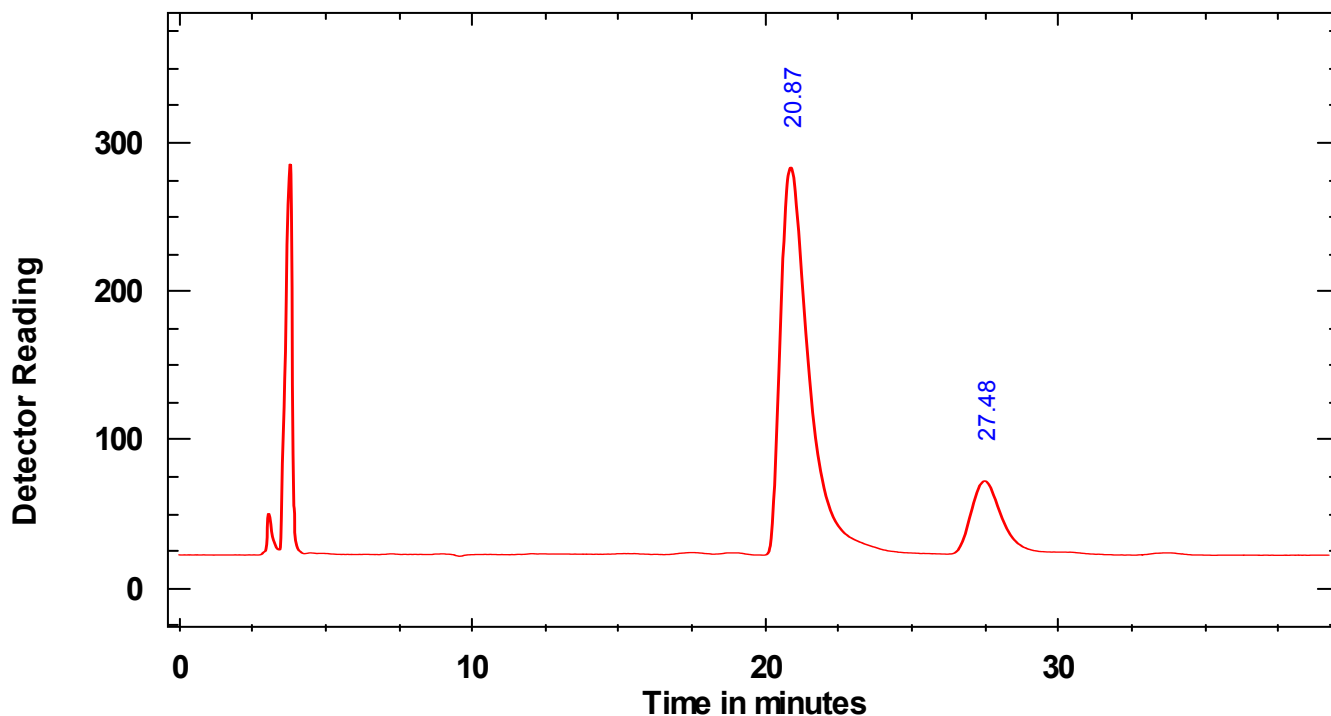

2010/7/17 03:42:50 Flow set to 1.00 at 0.00 minutes

2010/7/17 04:22:05 Run stopped by operator

## PEAK REPORT

| # | begin | end   | area  | percent | maximum | time  | begins as | name |
|---|-------|-------|-------|---------|---------|-------|-----------|------|
| 1 | 20.00 | 24.72 | 17725 | 83.5    | 283.50  | 20.87 | Baseline  |      |
| 2 | 26.22 | 29.42 | 3404  | 16.0    | 72.23   | 27.48 | Baseline  |      |



# Peak Report

PMK-02-368-racemate-colm-OD-4%ipa/Hex

Report produced on 2010/7/19 at 下午 08:10:52 by Put your name here

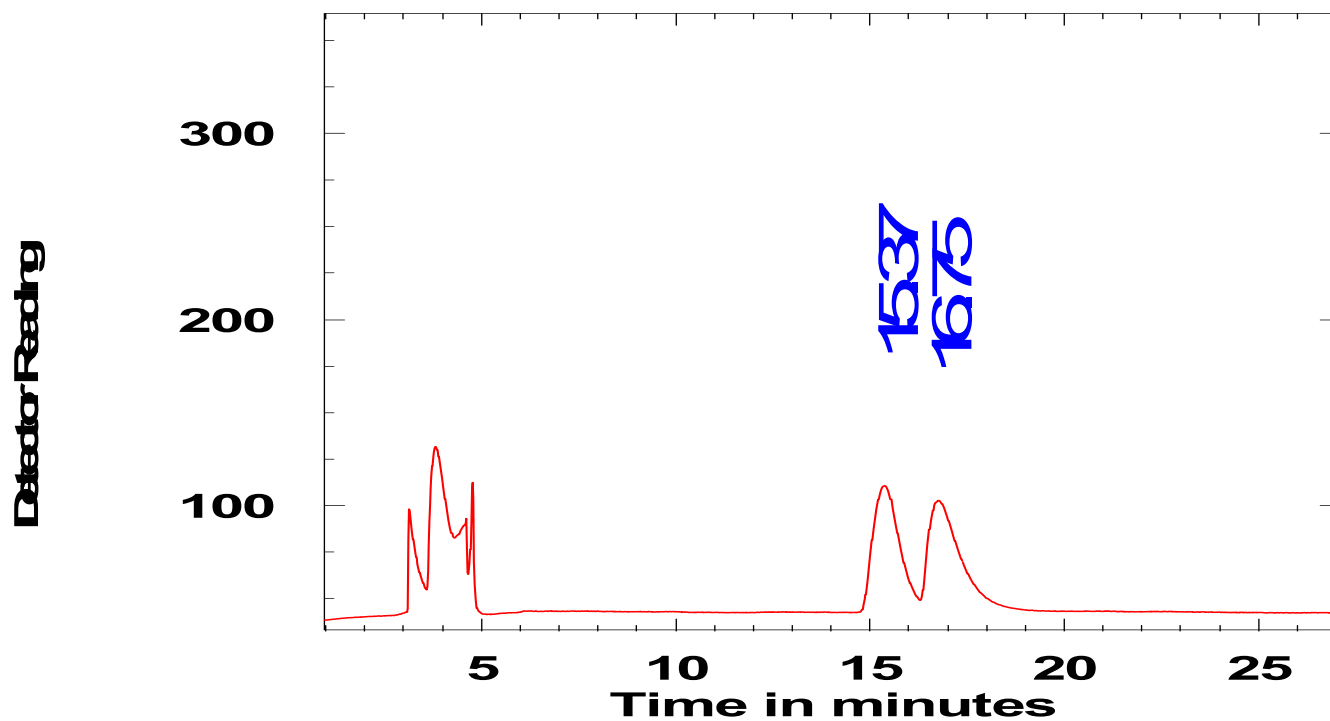

| Peak # | Begin | End   | Peak Area | Maximum | Time  | Area % | Begins as |
|--------|-------|-------|-----------|---------|-------|--------|-----------|
| 1      | 14.68 | 16.24 | 2877      | 110.55  | 15.37 | 51.7   | Baseline  |
| 2      | 16.34 | 18.56 | 2686      | 102.65  | 16.75 | 48.3   | Baseline  |





## Peak Report

PMK-02-368-chiral-colm-OD-4%ipa/Hex

Report produced on 2010/7/19 at 下午 06:18:06 by Put your name here

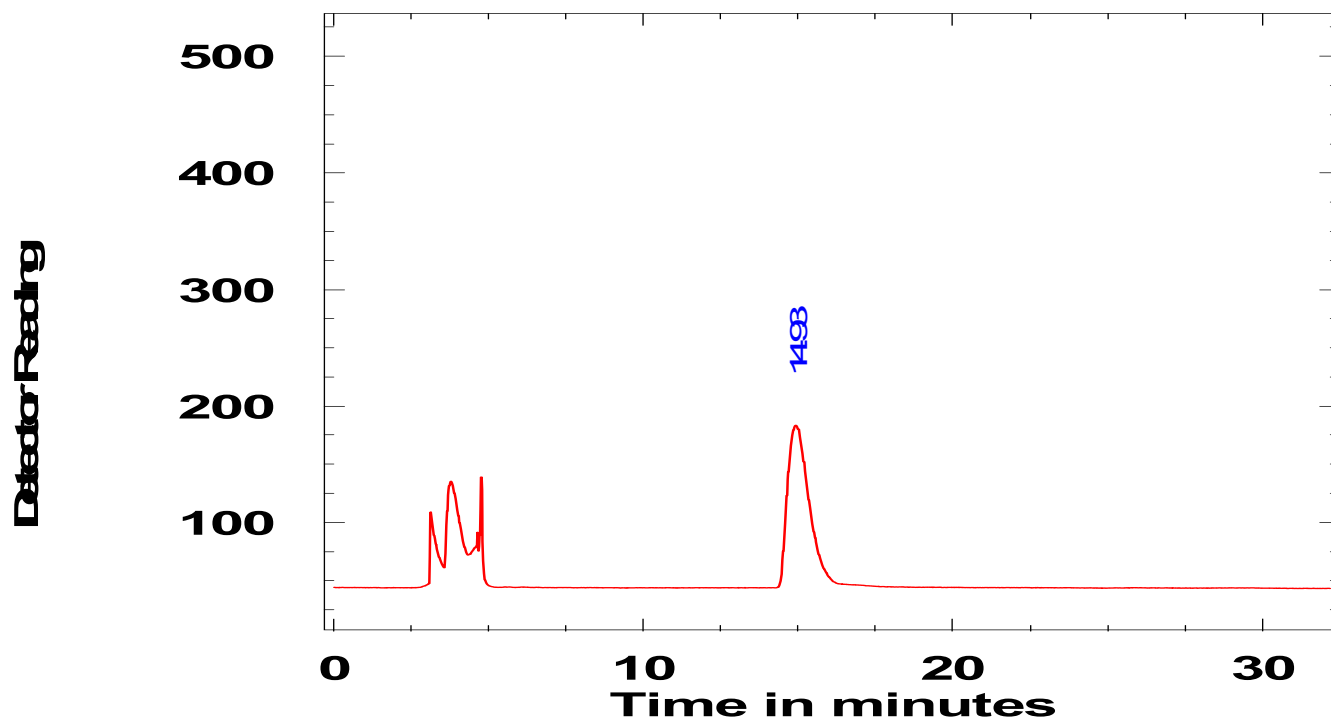

| Peak # | Begin | End   | Peak Area | Maximum | Time  | Area % | Begins as |
|--------|-------|-------|-----------|---------|-------|--------|-----------|
| 1      | 14.45 | 16.32 | 6140      | 183.38  | 14.93 | 100.0  | Baseline  |

Fig S138. HPLC analysis of the mixture of racemic and chiral compound 3d obtained.

(For comparison, Table 2, entry 4)  
# Supplementary Material (ESI) for Organic & Biomolecular Chemistry  
# This journal is (c) The Royal Society of Chemistry 2010

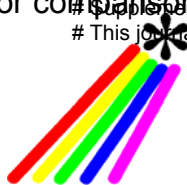

# Peak Report

PMK-02-368-chiral+racemate-collm-OD-4%ipa/Hex

Report produced on 2010/7/19 at 下午 06:21:34 by Put your name here

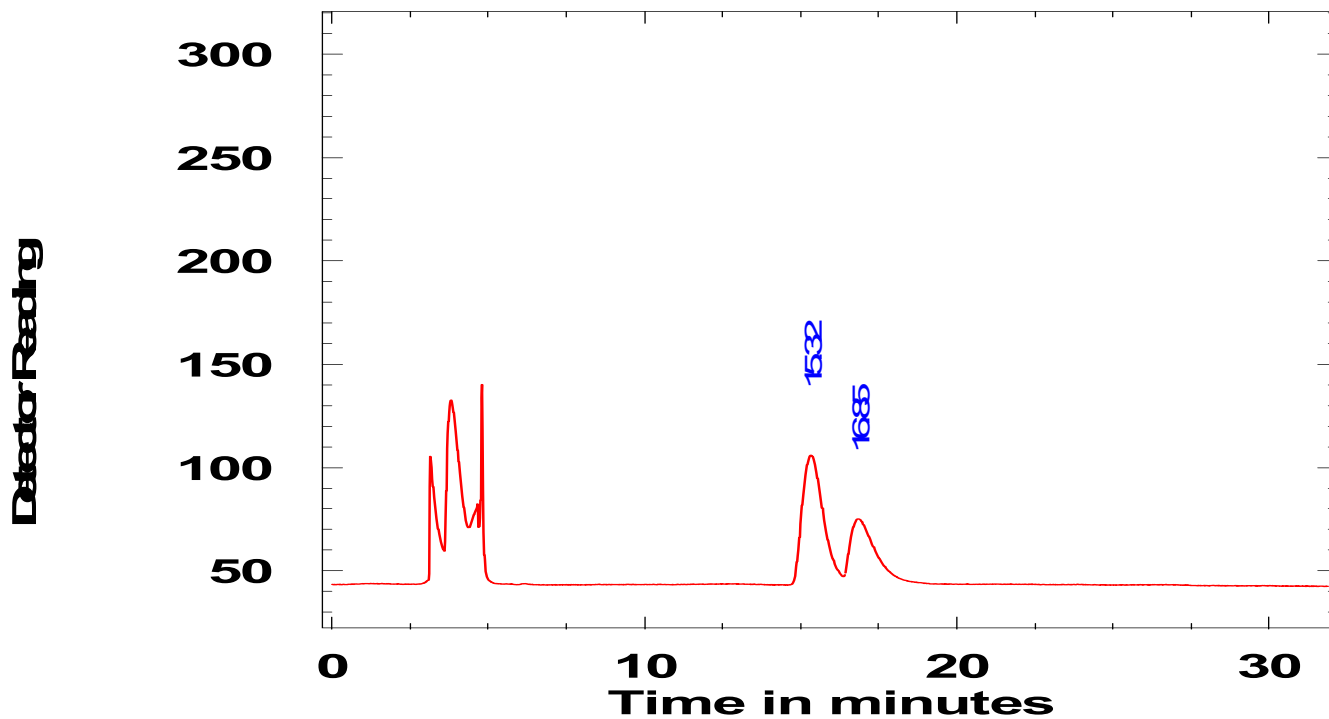

| Peak # | Begin | End   | Peak Area | Maximum | Time  | Area % | Begins as |
|--------|-------|-------|-----------|---------|-------|--------|-----------|
| 1      | 14.63 | 16.39 | 2759      | 105.92  | 15.32 | 77.3   | Baseline  |
| 2      | 16.54 | 18.29 | 812       | 75.10   | 16.85 | 22.7   | Baseline  |

(For comparison, Table 2, entry 5)

# Supplementary Material (ESI) for Organic & Biomolecular Chemistry  
# This journal is (c) The Royal Society of Chemistry 2010

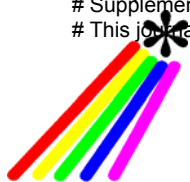

# Peak Report

PMK-02-371F1-racemate-colm-OD-6%ipa/Hex

Report produced on 2010/7/16 at 下午 05:42:02 by Put your name here

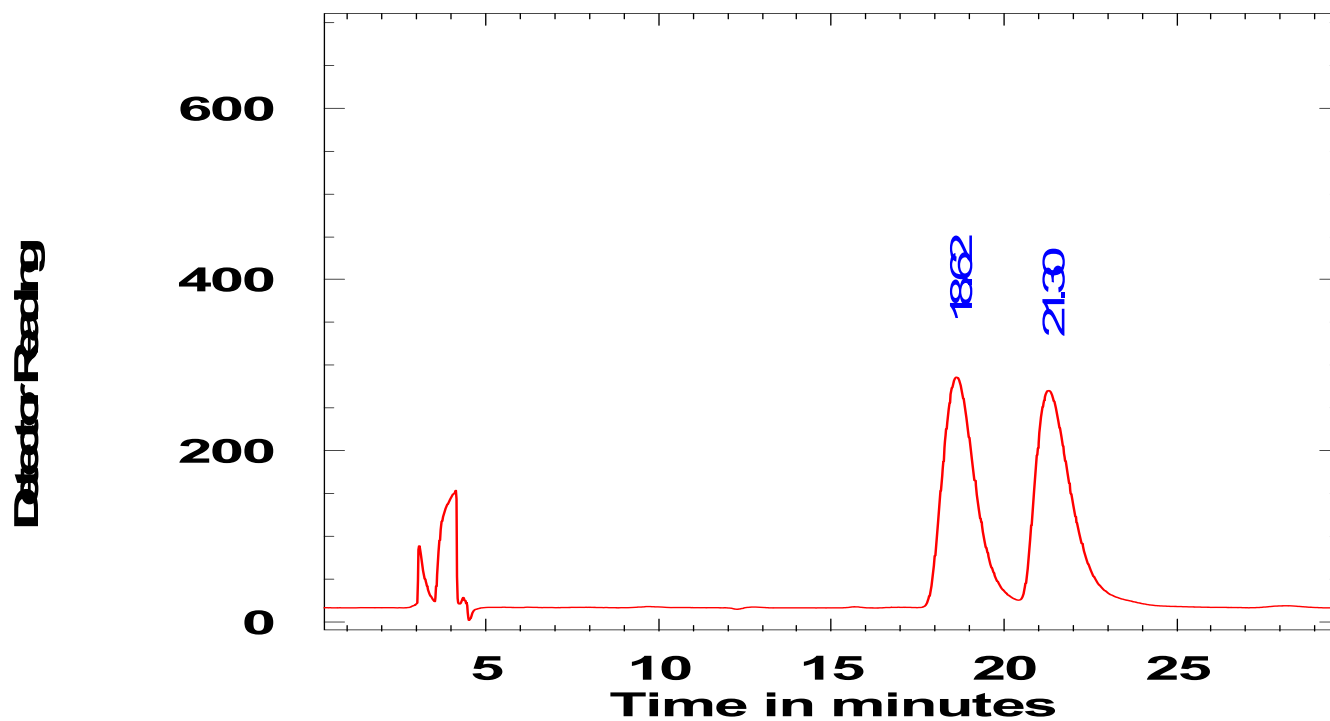

| Peak # | Begin | End   | Peak Area | Maximum | Time  | Area % | Begins as |
|--------|-------|-------|-----------|---------|-------|--------|-----------|
| 1      | 17.55 | 20.51 | 17202     | 285.81  | 18.62 | 50.6   | Baseline  |
| 2      | 20.56 | 24.02 | 16784     | 270.22  | 21.30 | 49.4   | Baseline  |

Fig S140. HPLC analysis of compound cis-3e obtained. (Table 2, entry 5)

# Supplementary Material (ESI) for Organic & Biomolecular Chemistry  
# This journal is (c) The Royal Society of Chemistry 2010



## Peak Report

PMK-02-371F1-chiral-colm-OD-6%ipa/Hex

Report produced on 2010/7/16 at 下午 05:38:33 by Put your name here

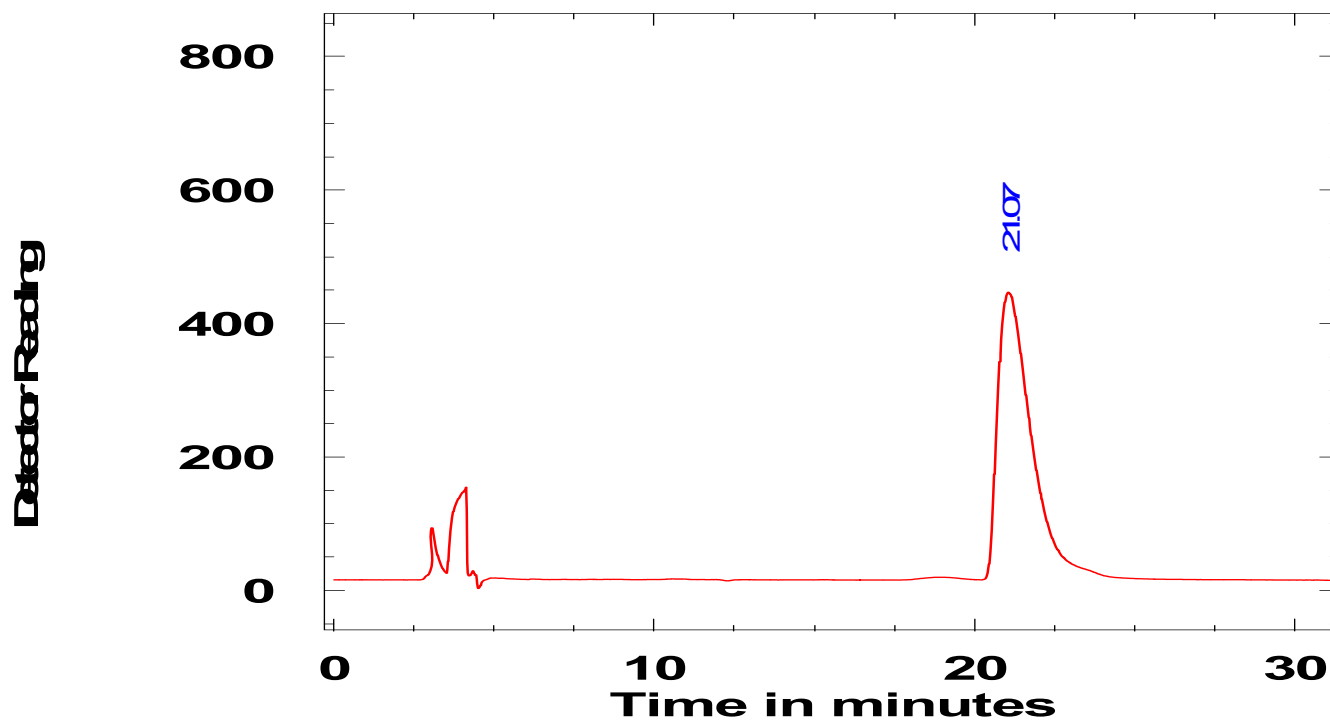

| Peak # | Begin | End   | Peak Area | Maximum | Time  | Area % | Begins as |
|--------|-------|-------|-----------|---------|-------|--------|-----------|
| 1      | 20.34 | 23.95 | 30647     | 446.82  | 21.07 | 100.0  | Baseline  |

Fig S141. HPLC analysis of the mixture of racemic and chiral compound cis-3e obtained.

(For comparison, Table 2 entry 5)  
# Supplemental Information for Organic & Medicinal Chemistry  
# This journal is (c) The Royal Society of Chemistry 2010

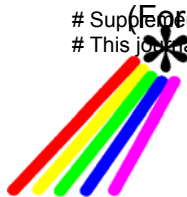

# Peak Report

PMK-02-371F1-chiral+racemate-colm-OD-6%ipa/Hex

Report produced on 2010/7/16 at 下午 05:36:58 by Put your name here

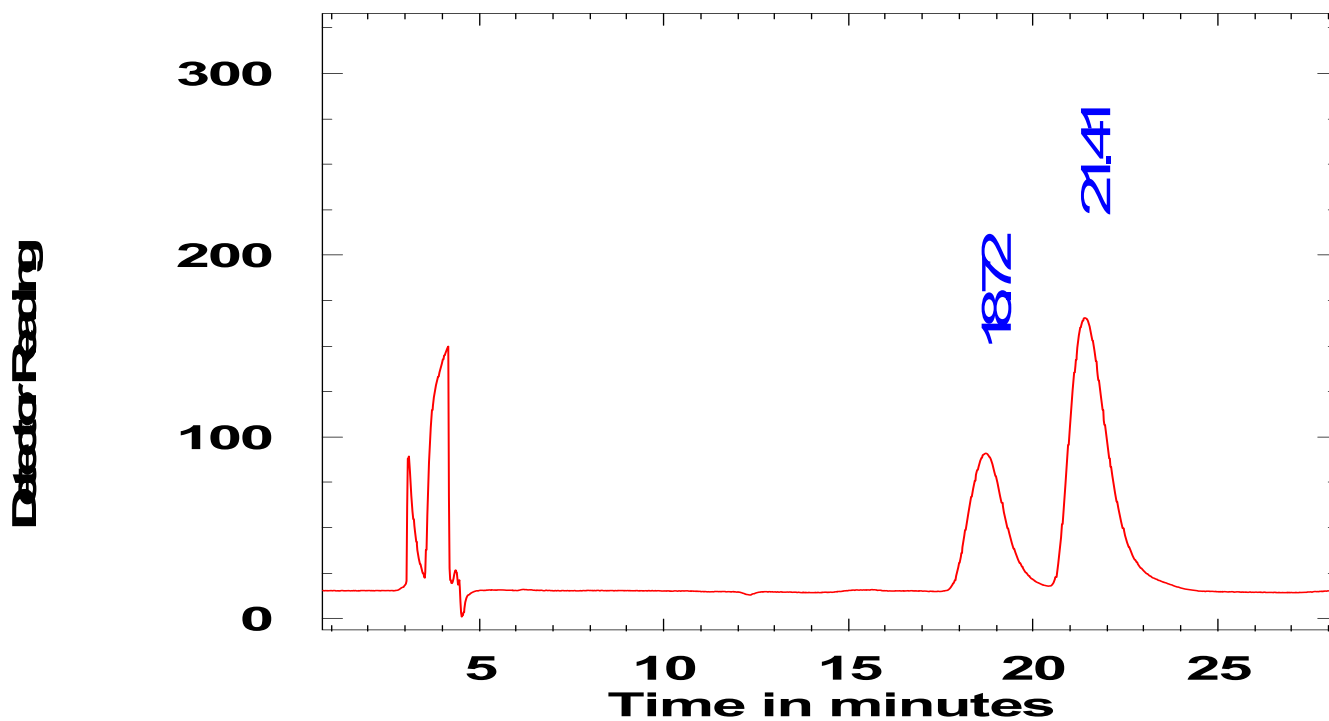

| Peak # | Begin | End   | Peak Area | Maximum | Time  | Area % | Begins as |
|--------|-------|-------|-----------|---------|-------|--------|-----------|
| 1      | 17.70 | 19.82 | 4353      | 90.94   | 18.72 | 29.4   | Baseline  |
| 2      | 20.56 | 24.04 | 10442     | 165.37  | 21.41 | 70.6   | Baseline  |

(For comparison Table 2, entry 5)

# Supplementary Material (ESI) for Organic & Biomolecular Chemistry  
# This journal is (c) The Royal Society of Chemistry 2010

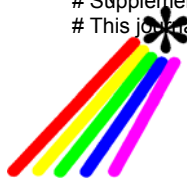

# Peak Report

PMK-02-371F2-racemate-colim-IA-5%ipa/hex

Report produced on 2010/7/26 at 下午 06:40:23 by Put your name here

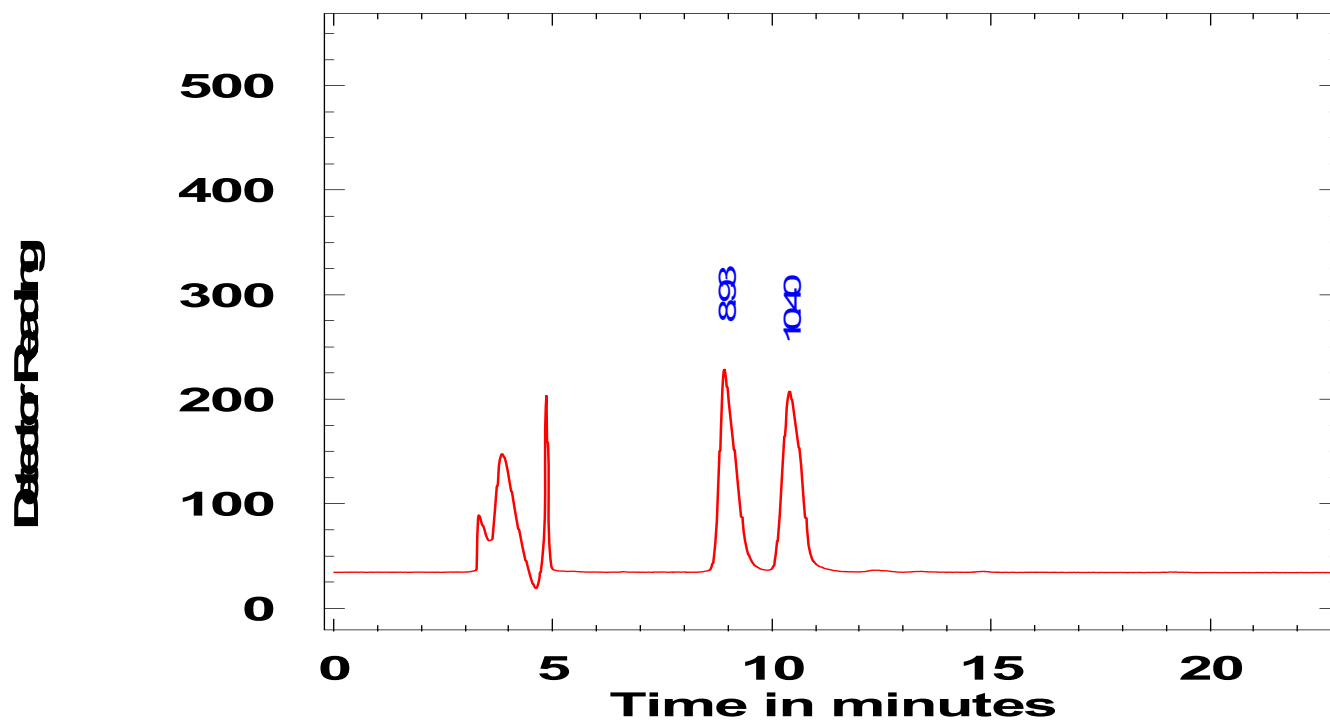

| Peak # | Begin | End   | Peak Area | Maximum | Time  | Area % | Begins as |
|--------|-------|-------|-----------|---------|-------|--------|-----------|
| 1      | 8.56  | 9.71  | 4730      | 228.35  | 8.93  | 49.9   | Baseline  |
| 2      | 10.01 | 11.24 | 4747      | 207.41  | 10.40 | 50.1   | Baseline  |

Fig S143. HPLC analysis of compound trans-3e obtained. (Table 2, entry 5)

# Supplementary Material (ESI) for Organic & Biomolecular Chemistry  
# This journal is (c) The Royal Society of Chemistry 2010



# Peak Report

PMK-02-371F2-chiral-colm-IA-5%ipa/hex

Report produced on 2010/7/26 at 下午 06:38:00 by Put your name here

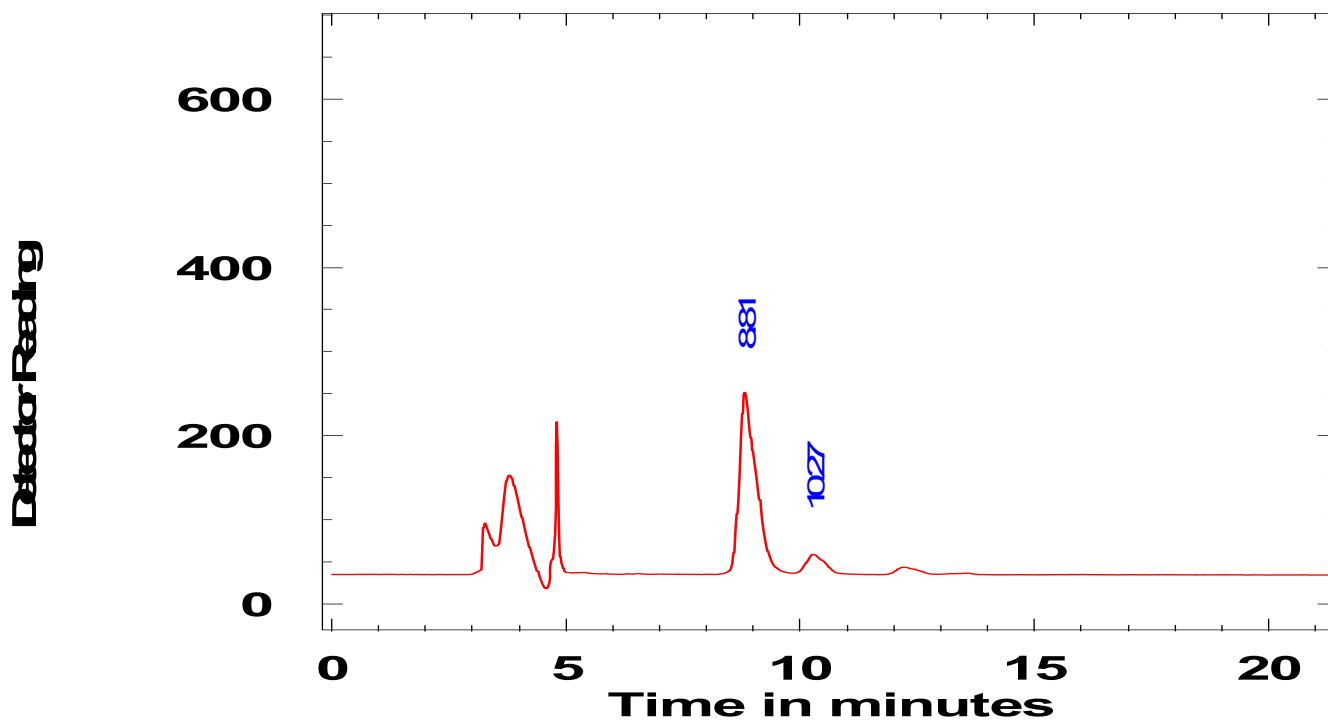

| Peak # | Begin | End   | Peak Area | Maximum | Time  | Area % | Begins as |
|--------|-------|-------|-----------|---------|-------|--------|-----------|
| 1      | 8.38  | 9.71  | 5329      | 251.24  | 8.81  | 93.1   | Baseline  |
| 2      | 9.93  | 10.63 | 398       | 58.78   | 10.27 | 6.9    | Baseline  |

(For comparison, Table 2, entry 5)

# Supplementary Material (ESI) for Organic & Biomolecular Chemistry  
# This journal is (c) The Royal Society of Chemistry 2010

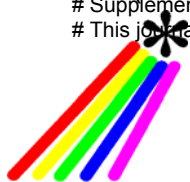

## Peak Report

PMK-02-371F2-chiral+racemate-colm-IA-5%ipa/hex

Report produced on 2010/7/26 at 下午 06:33:44 by Put your name here

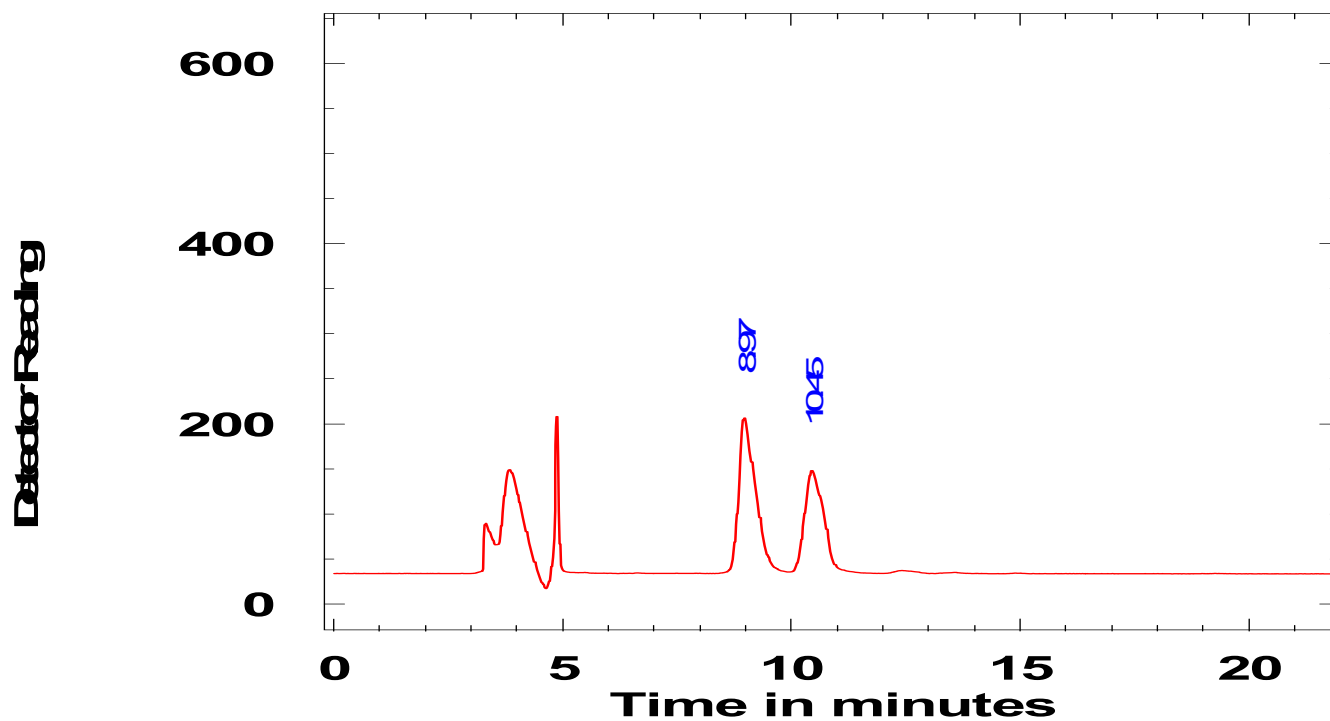

| Peak # | Begin | End   | Peak Area | Maximum | Time  | Area % | Begins as |
|--------|-------|-------|-----------|---------|-------|--------|-----------|
| 1      | 8.38  | 10.02 | 4388      | 206.33  | 8.97  | 59.9   | Baseline  |
| 2      | 10.09 | 11.07 | 2943      | 147.92  | 10.45 | 40.1   | Baseline  |





# Peak Report

PMK-02-375-racemate-colm-IA-6%ipa/Hex

Report produced on 2010/7/21 at 下午 03:27:28 by Put your name here

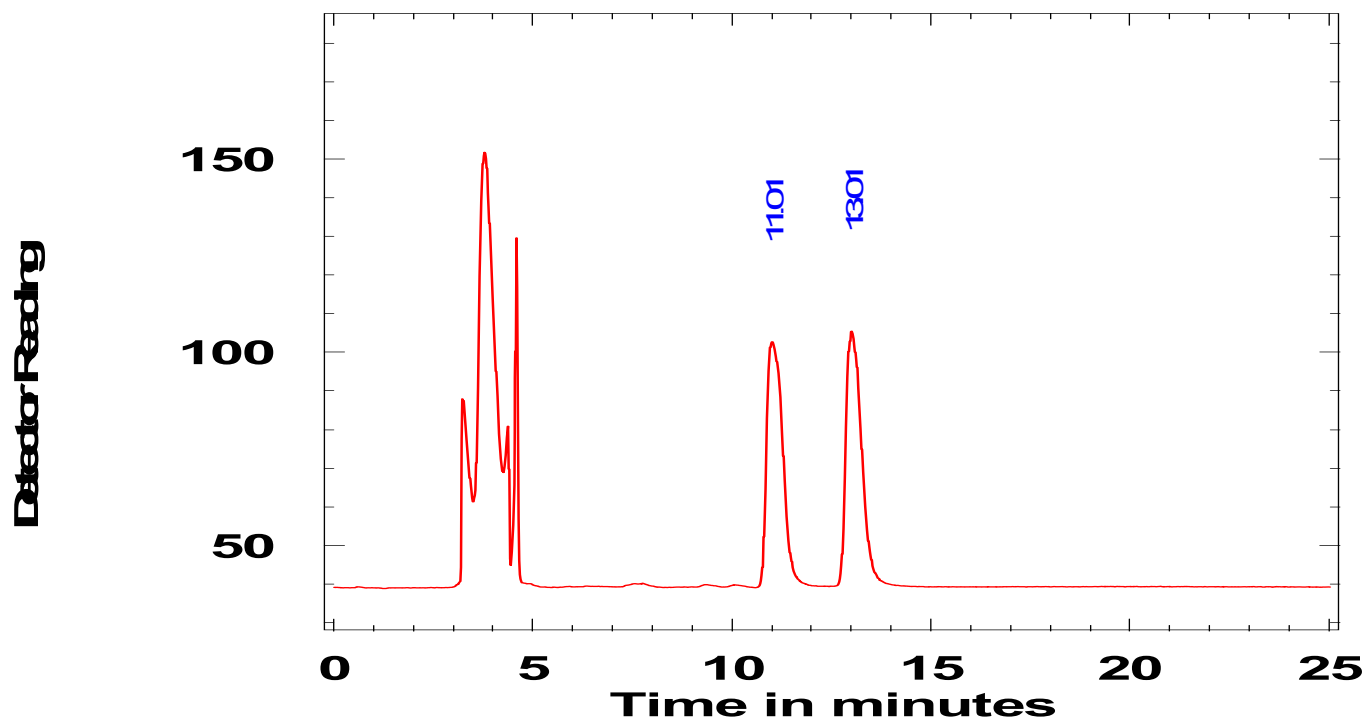

| Peak # | Begin | End   | Peak Area | Maximum | Time  | Area % | Begins as |
|--------|-------|-------|-----------|---------|-------|--------|-----------|
| 1      | 10.61 | 11.78 | 1741      | 102.71  | 11.01 | 50.0   | Baseline  |
| 2      | 12.70 | 14.04 | 1740      | 105.43  | 13.01 | 50.0   | Baseline  |

Fig S146. HPLC analysis of compound 3f obtained. (Table 2, entry 6)

# Supplementary Material (ESI) for Organic & Biomolecular Chemistry  
# This journal is (c) The Royal Society of Chemistry 2010

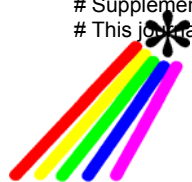

## Peak Report

PMK-02-375-chiral-colm-IA-6%ipa/Hex

Report produced on 2010/7/21 at 下午 03:29:44 by Put your name here

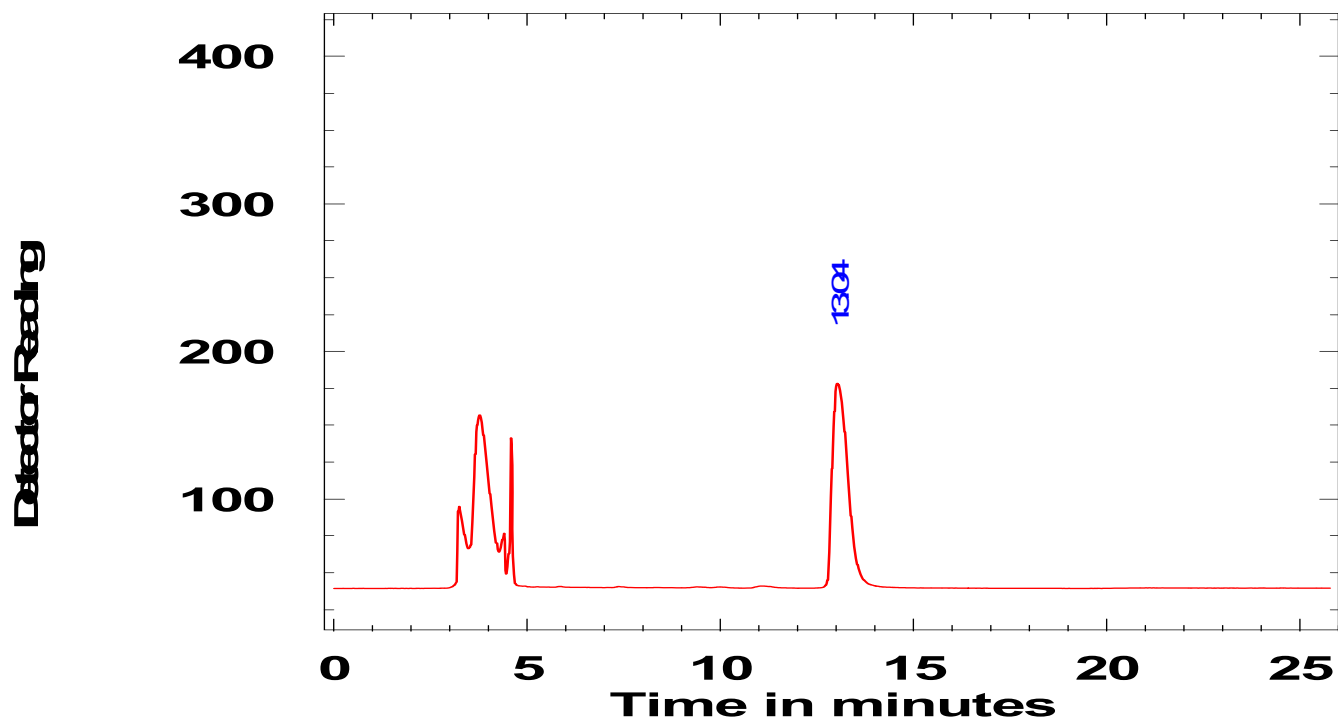

| Peak # | Begin | End   | Peak Area | Maximum | Time  | Area % | Begins as |
|--------|-------|-------|-----------|---------|-------|--------|-----------|
| 1      | 12.63 | 14.06 | 3850      | 178.32  | 13.04 | 100.0  | Baseline  |

Fig S147. HPLC analysis of the mixture of racemic and chiral compound 3f obtained.

(For comparison, Table 2, entry 6)

# Supplementary Material (ESI) for Organic & Biomolecular Chemistry

# This journal is (c) The Royal Society of Chemistry 2010

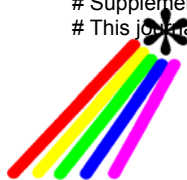

## Peak Report

PMK-02-375-chiral+racemate-collm-IA-6%ipa/Hex

Report produced on 2010/7/21 at 下午 03:31:34 by Put your name here

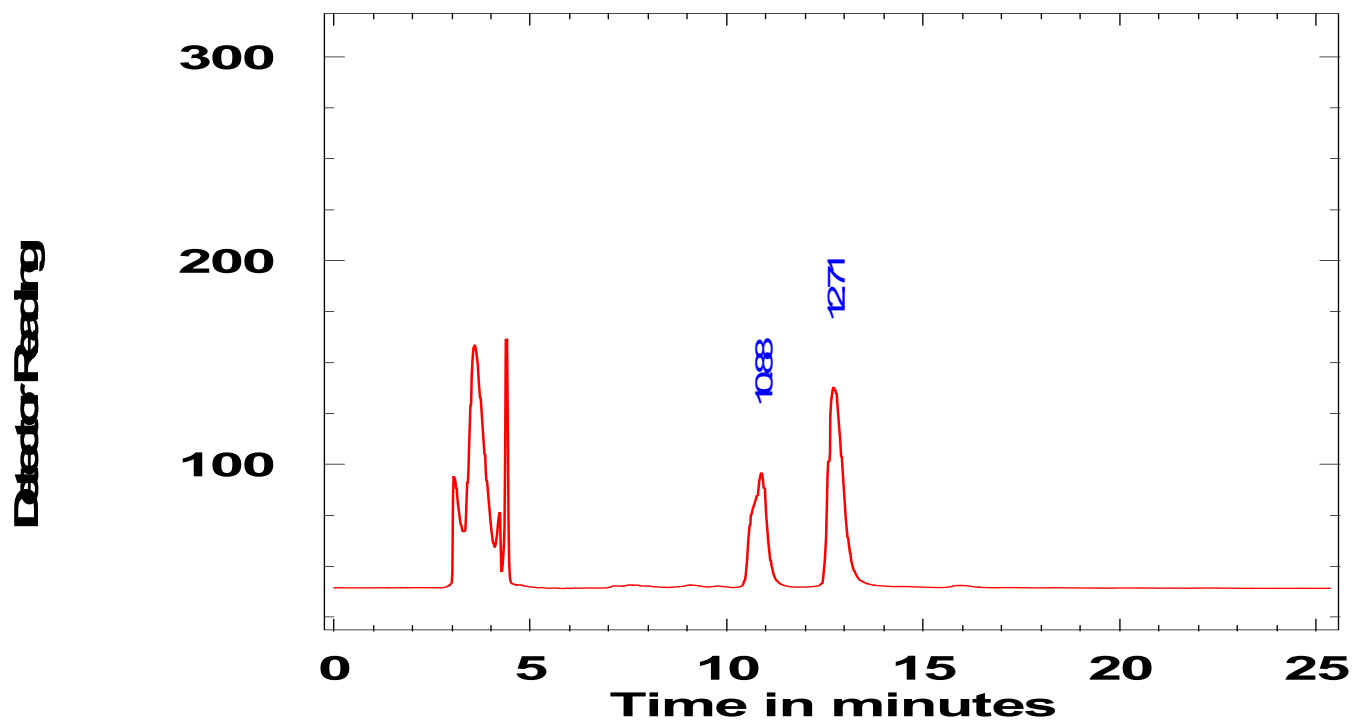

| Peak # | Begin | End   | Peak Area | Maximum | Time  | Area % | Begins as |
|--------|-------|-------|-----------|---------|-------|--------|-----------|
| 1      | 10.39 | 11.35 | 1413      | 95.81   | 10.88 | 37.8   | Baseline  |
| 2      | 12.45 | 13.40 | 2320      | 137.83  | 12.71 | 62.2   | Baseline  |

(For comparison, Table 2, entry 7)

# Supplementary Material (ESI) for Organic & Biomolecular Chemistry  
# This journal is (c) The Royal Society of Chemistry 2010



# Peak Report

PMK-02-379-racemate-colm-IA-6%ipa/Hex

Report produced on 2010/7/21 at 下午 03:33:17 by Put your name here

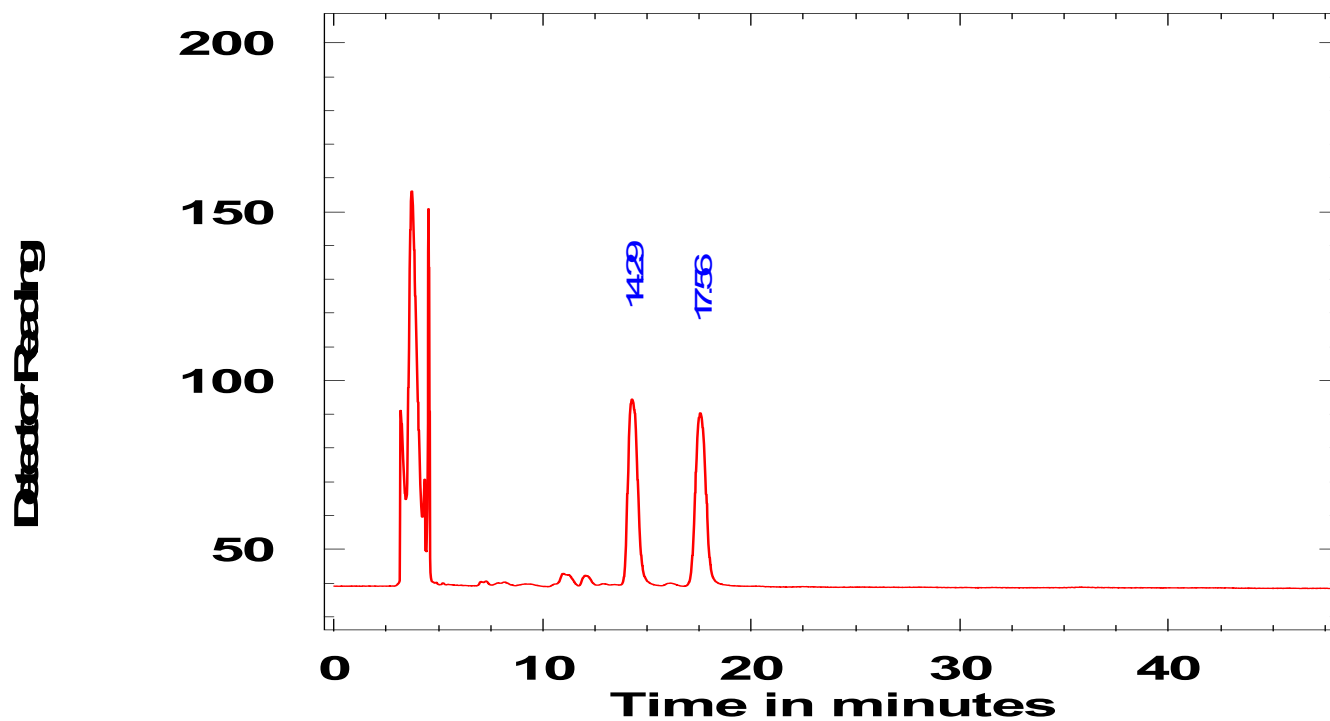

| Peak # | Begin | End   | Peak Area | Maximum | Time  | Area % | Begins as |
|--------|-------|-------|-----------|---------|-------|--------|-----------|
| 1      | 13.65 | 15.31 | 1759      | 94.46   | 14.29 | 49.9   | Baseline  |
| 2      | 16.90 | 18.79 | 1768      | 90.40   | 17.56 | 50.1   | Baseline  |

Fig S149. HPLC analysis of compound 3g obtained. (Table 2, entry 7)

# Supplementary Material (ESI) for Organic & Biomolecular Chemistry  
# This journal is (c) The Royal Society of Chemistry 2010



## Peak Report

PMK-02-379-chiral-colm-IA-6%ipa/Hex

Report produced on 2010/7/21 at 下午 03:35:10 by Put your name here

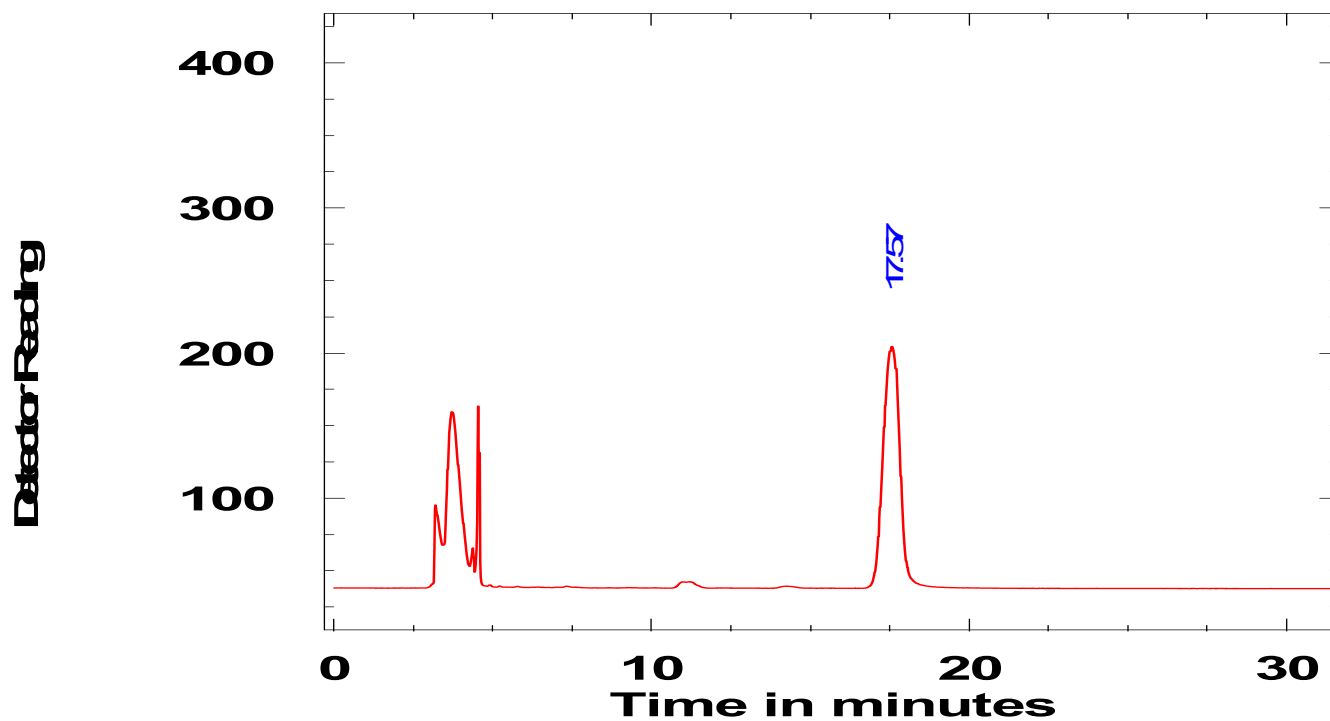

| Peak # | Begin | End   | Peak Area | Maximum | Time  | Area % | Begins as |
|--------|-------|-------|-----------|---------|-------|--------|-----------|
| 1      | 16.77 | 18.51 | 5938      | 204.58  | 17.57 | 100.0  | Baseline  |

Fig S150. HPLC analysis of the mixture of racemic and chiral compound 3g obtained.

(For comparison, Table 2, entry 7)

# Supplementary Material (ESI) for Organic & Biomolecular Chemistry

# This journal is (c) The Royal Society of Chemistry 2010

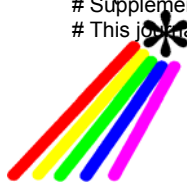

## Peak Report

PMK-02-379-chiral+racemate-collm-IA-6%ipa/Hex

Report produced on 2010/7/21 at 下午 03:36:27 by Put your name here

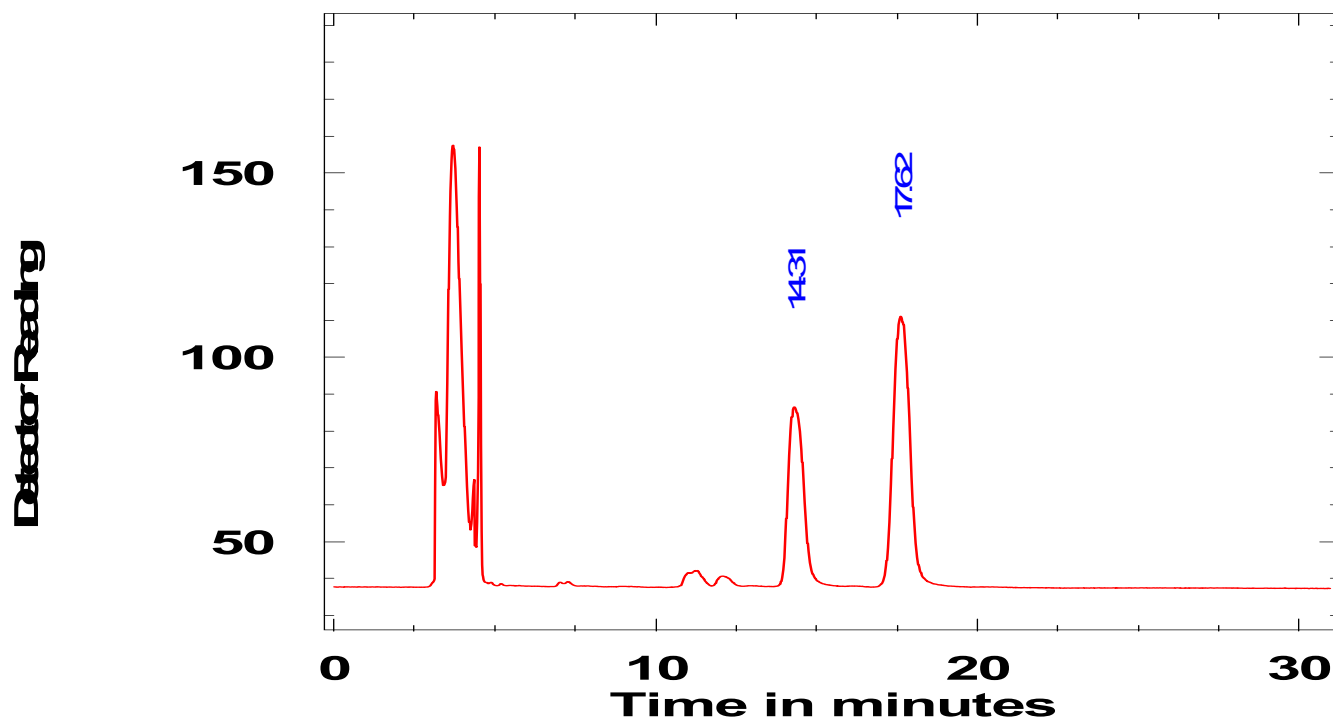

| Peak # | Begin | End   | Peak Area | Maximum | Time  | Area % | Begins as |
|--------|-------|-------|-----------|---------|-------|--------|-----------|
| 1      | 13.85 | 15.06 | 1529      | 86.55   | 14.31 | 36.8   | Baseline  |
| 2      | 16.82 | 18.93 | 2623      | 111.13  | 17.62 | 63.2   | Baseline  |

Fig S151. HPLC analysis of racemic compound 3h.

(For comparison Table 2, entry 8)

# Supplementary Material (ESI) for Organic & Biomolecular Chemistry  
# This journal is (c) The Royal Society of Chemistry 2010

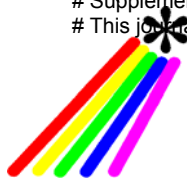

# Peak Report

PMK-02-390-racemate-colm-OD-10%ipa/hex

Report produced on 2010/7/26 at 下午 03:19:53 by Put your name here

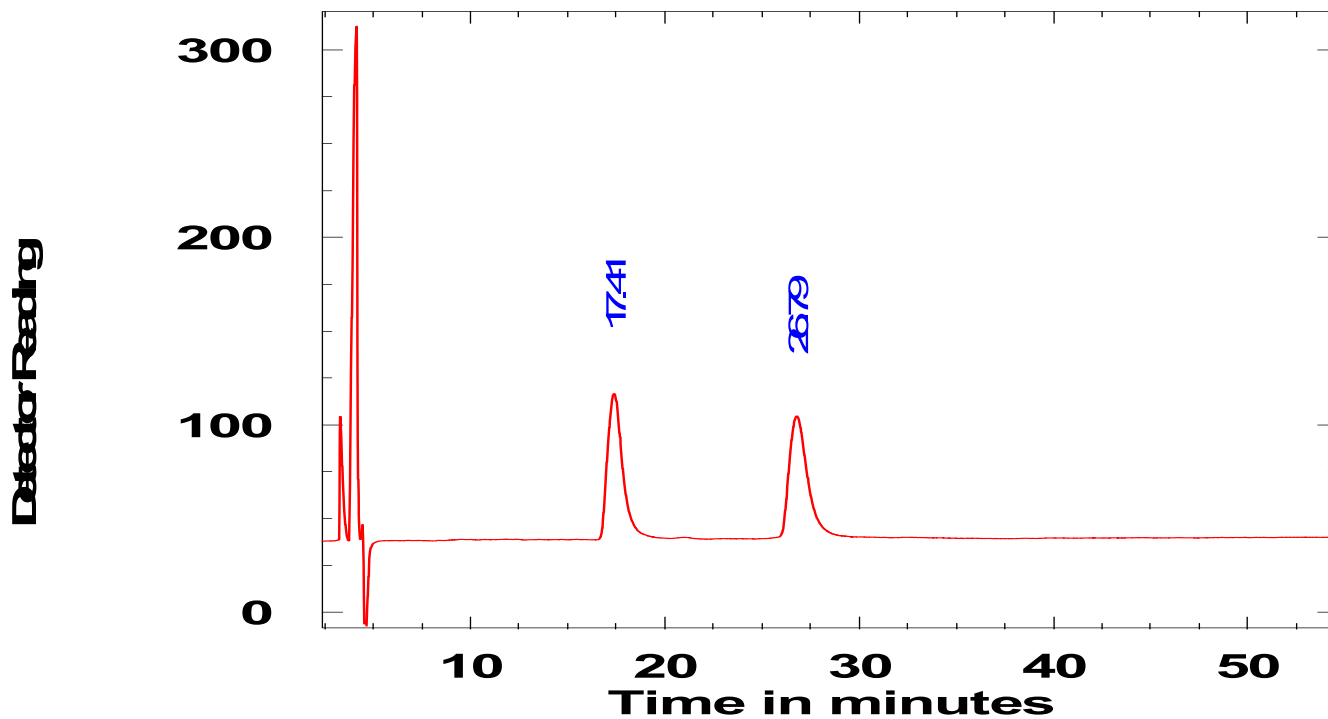

| Peak # | Begin | End   | Peak Area | Maximum | Time  | Area % | Begins as |
|--------|-------|-------|-----------|---------|-------|--------|-----------|
| 1      | 16.60 | 19.11 | 4085      | 116.60  | 17.41 | 49.2   | Baseline  |
| 2      | 25.64 | 29.47 | 4212      | 104.63  | 26.79 | 50.8   | Baseline  |



# Peak Report

PMK-02-390-chiral-colm-OD-10%ipa/hex

Report produced on 2010/7/26 at 下午 03:28:38 by Put your name here

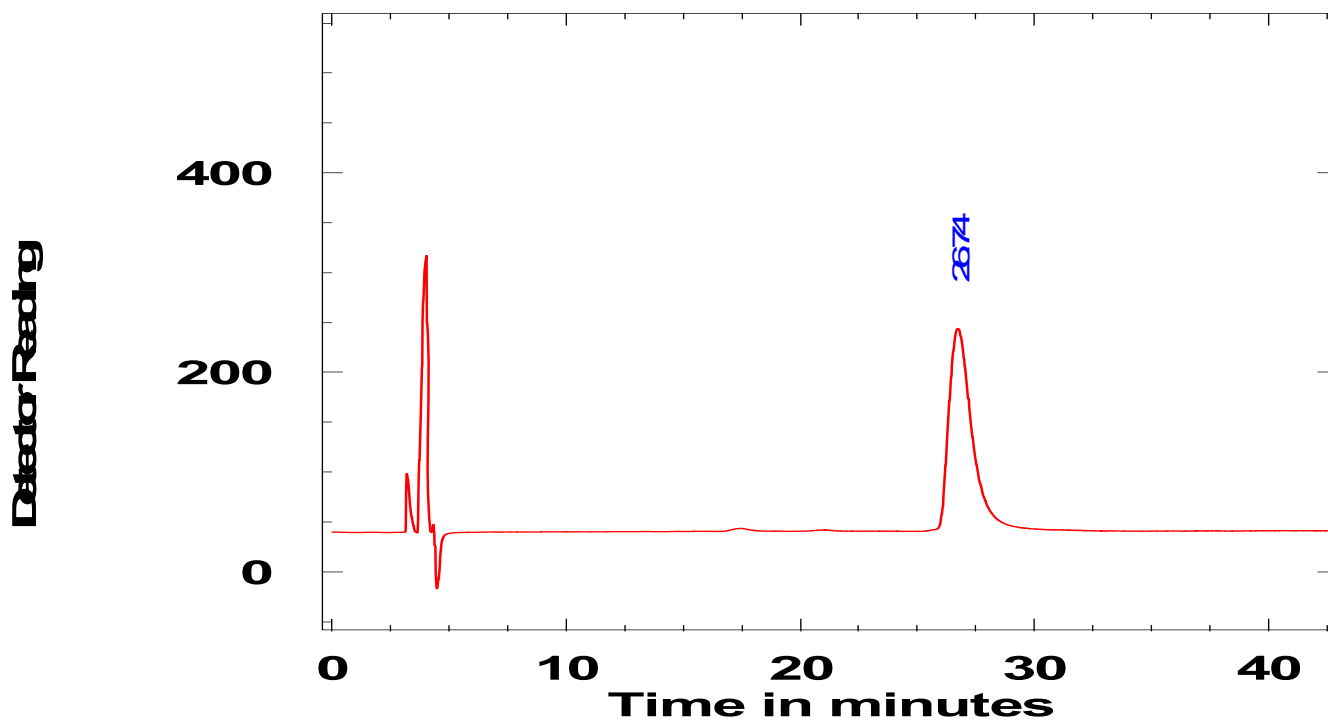

| Peak # | Begin | End   | Peak Area | Maximum | Time  | Area % | Begins as |
|--------|-------|-------|-----------|---------|-------|--------|-----------|
| 1      | 25.71 | 30.60 | 13799     | 244.11  | 26.74 | 100.0  | Baseline  |



Fig S153. HPLC analysis of the mixture of racemic and chiral compound 3h obtained.

(For comparison, Table 2, entry 8)  
# Supplementary Material (ESI) for Organic & Biomolecular Chemistry  
# This journal is (c) The Royal Society of Chemistry 2010

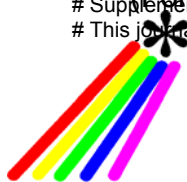

## Peak Report

PMK-02-390-chiral+racemate-collm-OD-10%ipa/hex

Report produced on 2010/7/26 at 下午 03:33:15 by Put your name here

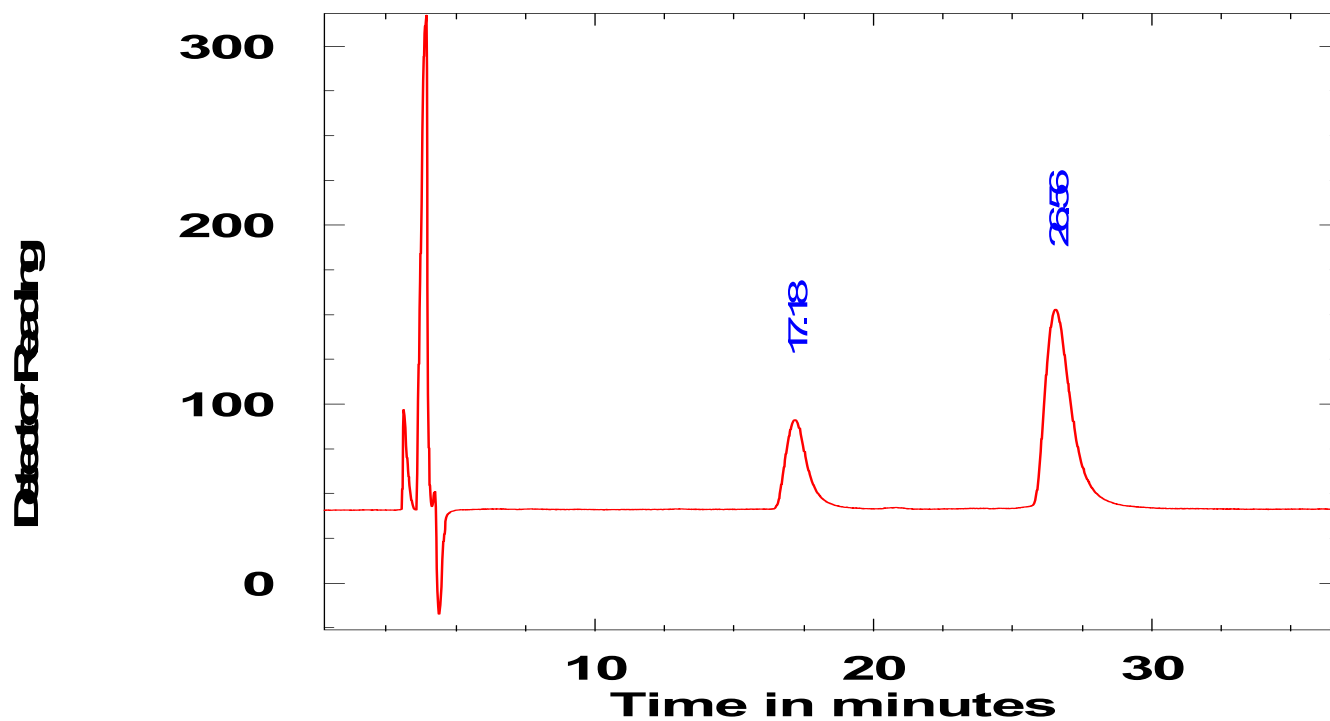

| Peak # | Begin | End   | Peak Area | Maximum | Time  | Area % | Begins as |
|--------|-------|-------|-----------|---------|-------|--------|-----------|
| 1      | 16.57 | 18.87 | 2367      | 91.32   | 17.18 | 24.8   | Baseline  |
| 2      | 25.51 | 29.25 | 7195      | 152.92  | 26.56 | 75.2   | Baseline  |

Fig S154. HPLC analysis of racemic compound cis-3i.

(For comparison Table 2, entry 9)  
# Supplementary Material (ESI) for Organic & Biomolecular Chemistry  
# This journal is (c) The Royal Society of Chemistry 2010

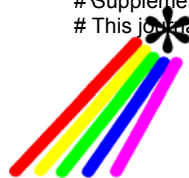

# Peak Report

PMK-02-377-racemate-2%ipa/Hex

Report produced on 2010/7/28 at 下午 01:23:34 by Put your name here

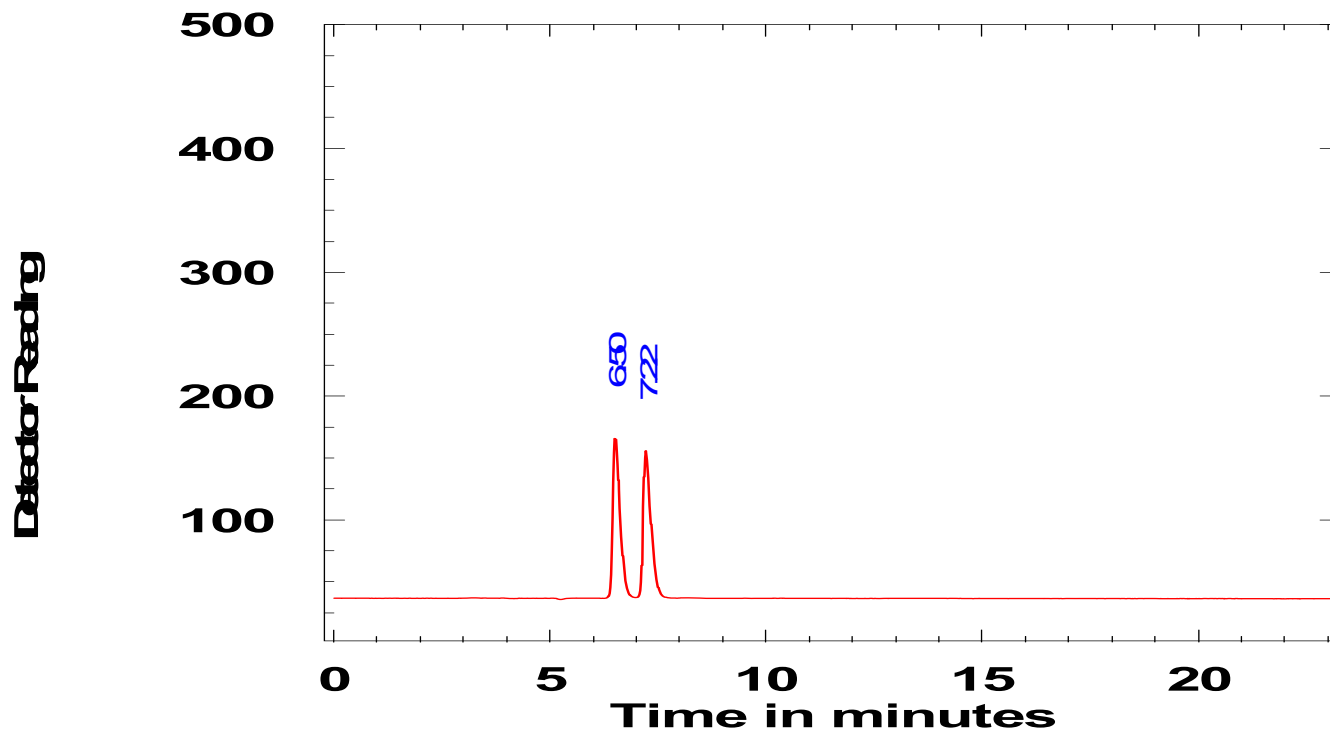

| Peak # | Begin | End  | Peak Area | Maximum | Time | Area % | Begins as |
|--------|-------|------|-----------|---------|------|--------|-----------|
| 1      | 6.33  | 6.86 | 1476      | 165.73  | 6.50 | 49.8   | Baseline  |
| 2      | 7.04  | 7.81 | 1486      | 155.76  | 7.22 | 50.2   | Baseline  |

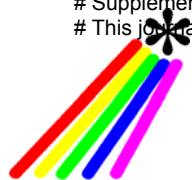

# Peak Report

PMK-02-377-chiral-2%ipa/Hex

Report produced on 2010/7/28 at 下午 01:21:49 by Put your name here

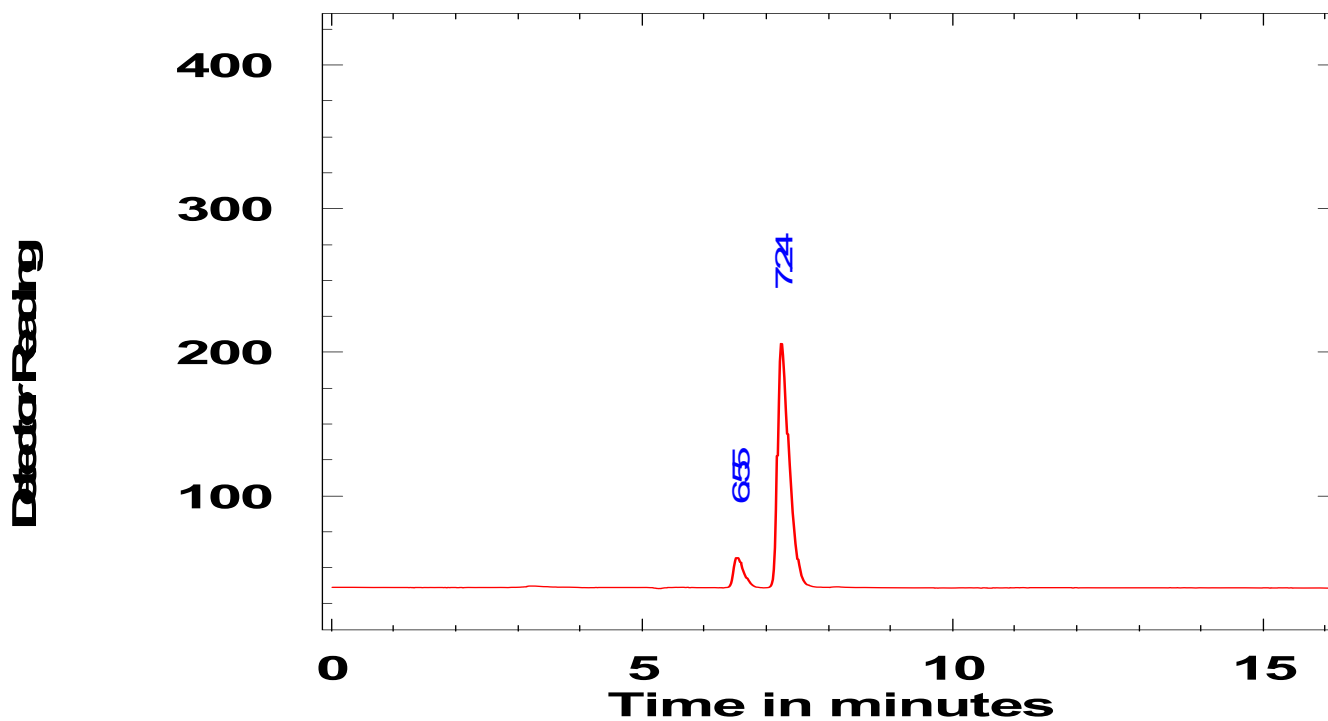

| Peak # | Begin | End  | Peak Area | Maximum | Time | Area % | Begins as |
|--------|-------|------|-----------|---------|------|--------|-----------|
| 1      | 6.40  | 6.69 | 156       | 57.05   | 6.55 | 6.6    | Baseline  |
| 2      | 7.05  | 7.94 | 2196      | 206.15  | 7.24 | 93.4   | Baseline  |

(For comparison, Table 2, entry 9)

# Supplementary Material (ESI) for Organic & Biomolecular Chemistry  
# This journal is (c) The Royal Society of Chemistry 2010



## Peak Report

PMK-02-377-chiral+racemate-2%ipa/Hex

Report produced on 2010/7/28 at 下午 01:48:22 by Put your name here

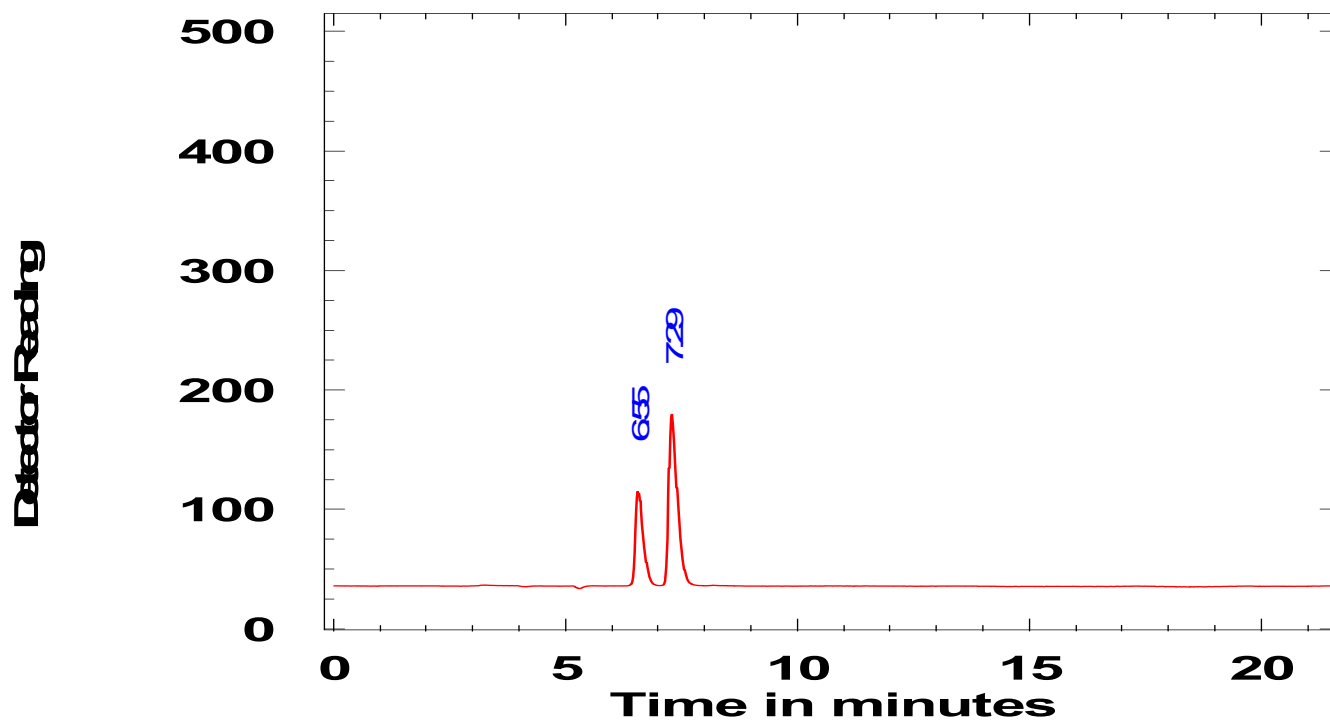

| Peak # | Begin | End  | Peak Area | Maximum | Time | Area % | Begins as |
|--------|-------|------|-----------|---------|------|--------|-----------|
| 1      | 6.34  | 6.81 | 818       | 114.93  | 6.55 | 30.7   | Baseline  |
| 2      | 7.06  | 7.83 | 1849      | 179.51  | 7.29 | 69.3   | Baseline  |

Fig S157. HPLC analysis of the racemic compound trans-3i.

(For comparison, Table 2, entry 9)

# Supplementary Material (ESI) for Organic & Biomolecular Chemistry  
# This journal is (c) The Royal Society of Chemistry 2010

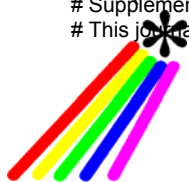

## Peak Report

PMK-02-377-F2-racemate-colm-IB-3%ipa-hex

Report produced on 2010/9/15 at 下午 06:29:08 by Put your name here

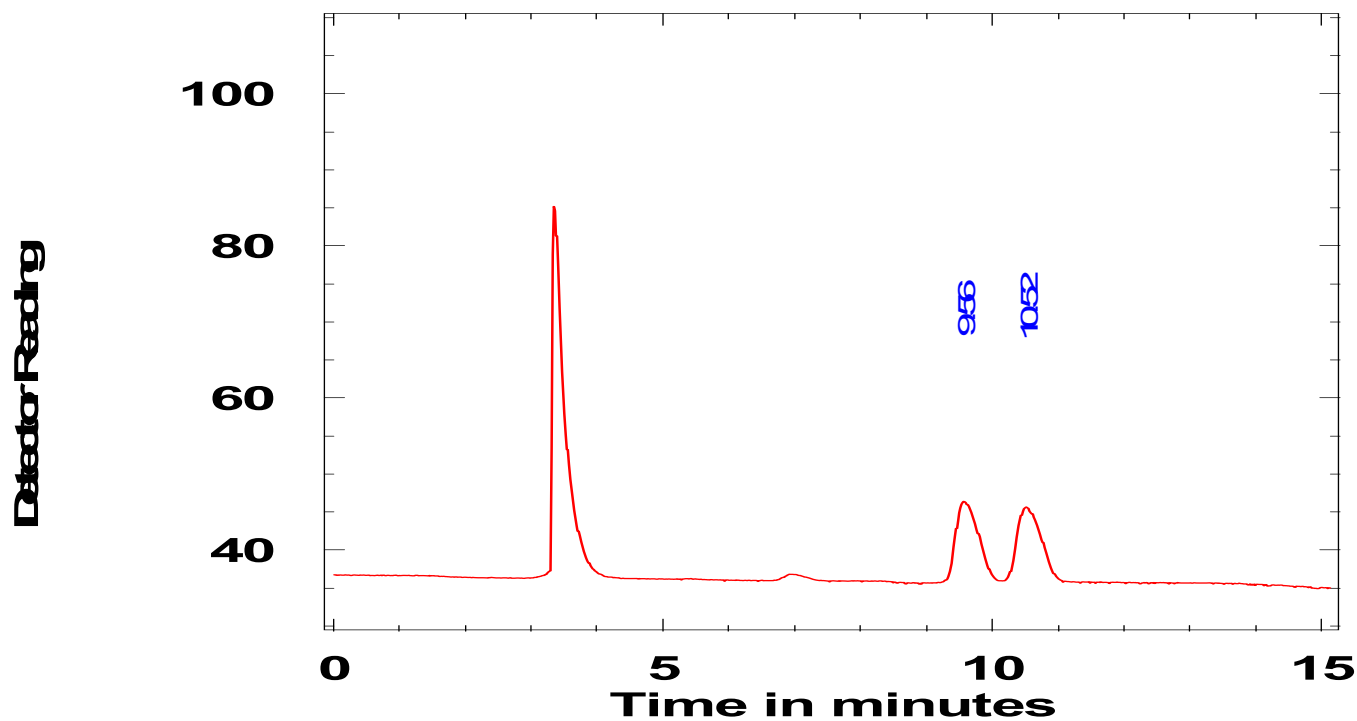

| Peak # | Begin | End   | Peak Area | Maximum | Time  | Area % | Begins as |
|--------|-------|-------|-----------|---------|-------|--------|-----------|
| 1      | 9.20  | 10.09 | 249       | 46.40   | 9.56  | 51.0   | Baseline  |
| 2      | 10.19 | 11.04 | 240       | 45.66   | 10.52 | 49.0   | Baseline  |

Fig S158. HPLC analysis of compound trans-3i obtained. (Table 2, entry 9)

# Supplementary Material (ESI) for Organic & Biomolecular Chemistry  
# This journal is (c) The Royal Society of Chemistry 2010

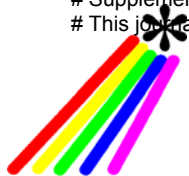

# Peak Report

PMK-02-377-F2-chiral-colm-IB-3%ipa-hex

Report produced on 2010/9/15 at 下午 06:28:04 by Put your name here

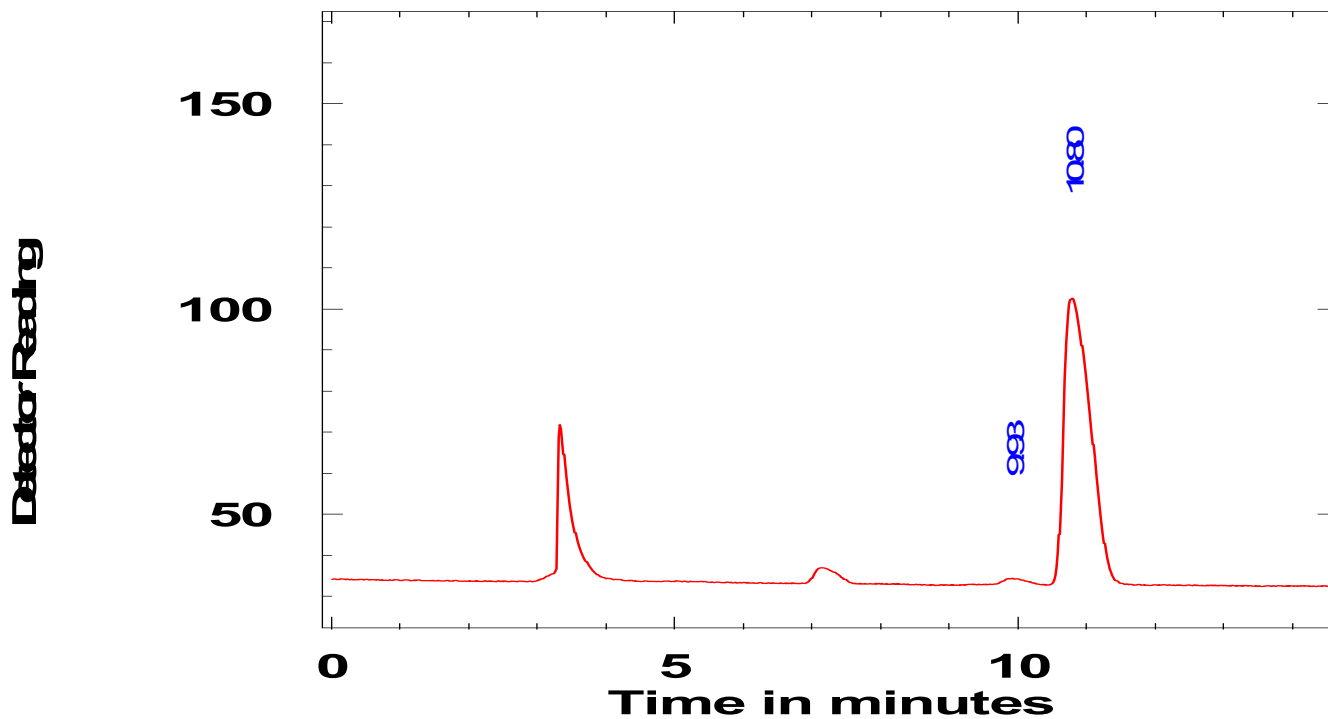

| Peak # | Begin | End   | Peak Area | Maximum | Time  | Area % | Begins as |
|--------|-------|-------|-----------|---------|-------|--------|-----------|
| 1      | 9.71  | 10.35 | 29        | 34.46   | 9.93  | 1.6    | Baseline  |
| 2      | 10.50 | 11.42 | 1811      | 102.62  | 10.80 | 98.4   | Baseline  |

Fig S159. HPLC analysis of the mixture of racemic and chiral compound trans-3i obtained.

(For comparison Table 2 entry 9)  
# Supplementary Material (ESI) for Organic & Biomolecular Chemistry  
# This journal is (c) The Royal Society of Chemistry 2010

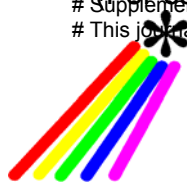

## Peak Report

PMK-02-377-F2-chiral+racemate-colm-IB-3%ipa-hex

Report produced on 2010/9/15 at 下午 06:25:35 by Put your name here

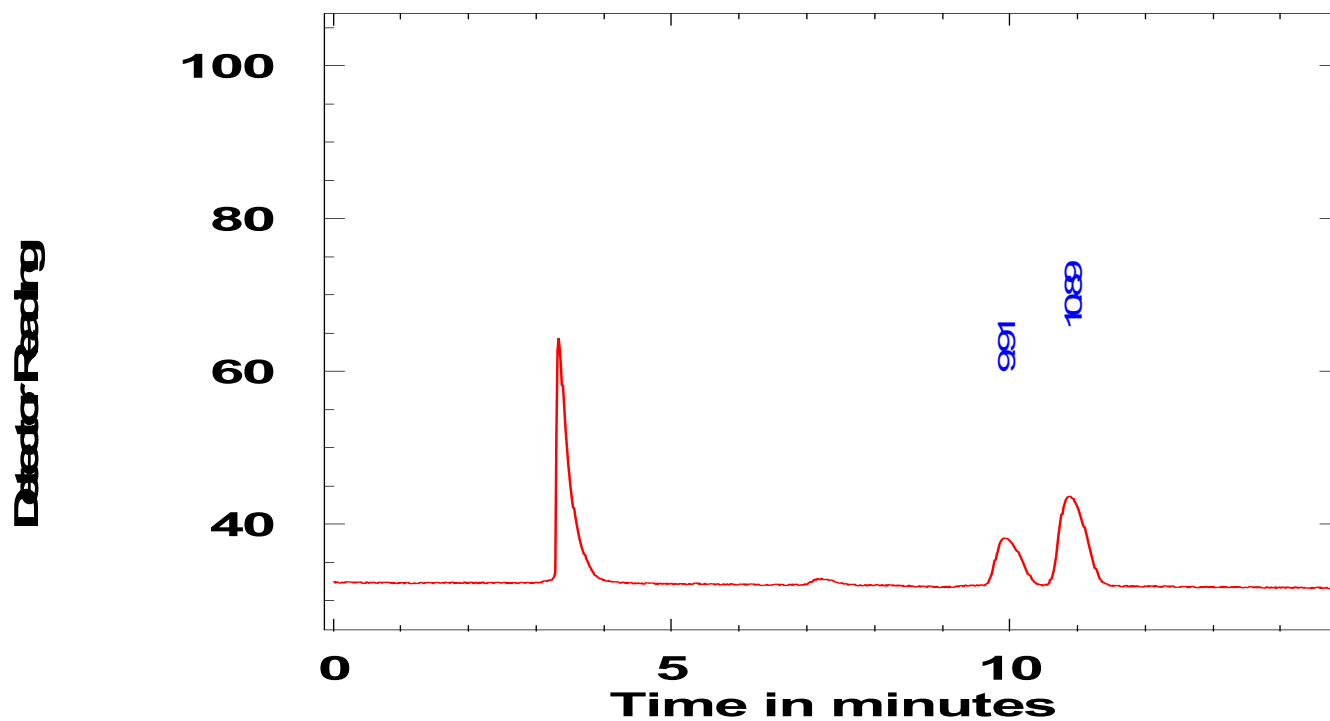

| Peak # | Begin | End   | Peak Area | Maximum | Time  | Area % | Begins as |
|--------|-------|-------|-----------|---------|-------|--------|-----------|
| 1      | 9.68  | 10.45 | 143       | 38.19   | 9.91  | 32.6   | Baseline  |
| 2      | 10.55 | 11.37 | 297       | 43.67   | 10.89 | 67.4   | Baseline  |

Fig S160. HPLC analysis of racemic compound 3j.

(For comparison, Table 2, entry 10)  
# Supplementary Material (ESI) for Organic & Biomolecular Chemistry  
# This journal is (c) The Royal Society of Chemistry 2010

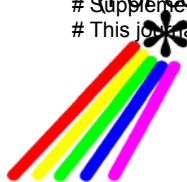

## Peak Report

PMK-02-360-racemate-colm- OD-8%ipa/hex

Report produced on 2010/7/16 at 上午 10:57:18 by Put your name here

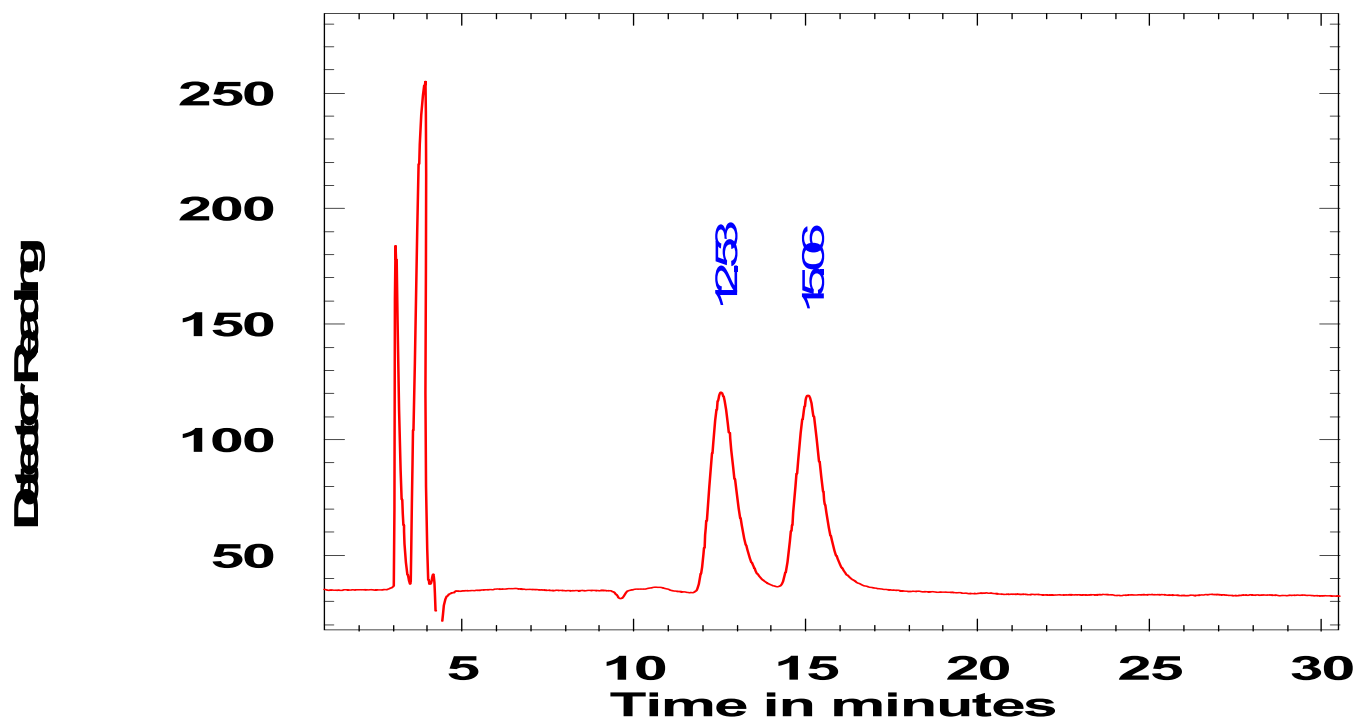

| Peak # | Begin | End   | Peak Area | Maximum | Time  | Area % | Begins as |
|--------|-------|-------|-----------|---------|-------|--------|-----------|
| 1      | 11.86 | 14.22 | 4302      | 120.59  | 12.53 | 50.4   | Baseline  |
| 2      | 14.36 | 17.00 | 4231      | 119.17  | 15.06 | 49.6   | Baseline  |





# Peak Report

PMK-02-360-Chiral-colum- OD-8%ipa/hex

Report produced on 2010/7/15 at 下午 05:54:43 by .

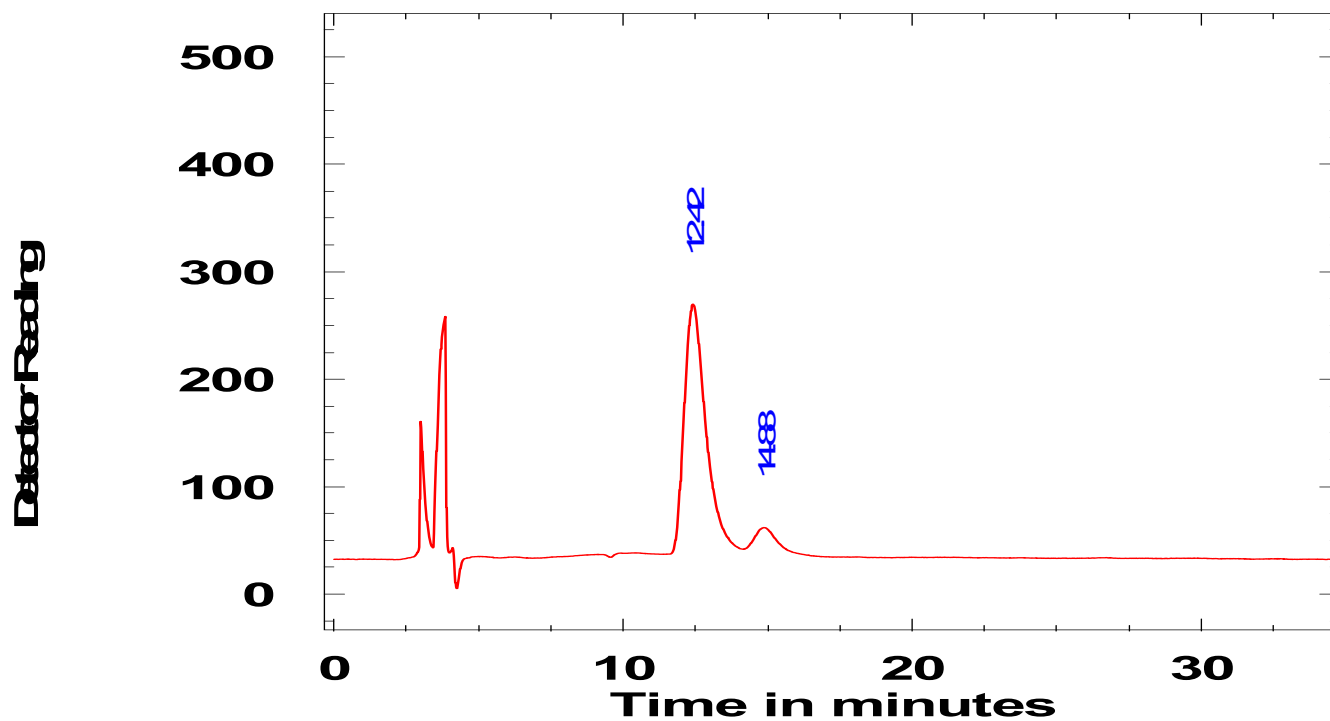

| Peak # | Begin | End   | Peak Area | Maximum | Time  | Area % | Begins as |
|--------|-------|-------|-----------|---------|-------|--------|-----------|
| 1      | 11.65 | 14.40 | 11600     | 269.84  | 12.42 | 95.9   | Baseline  |
| 2      | 14.52 | 15.57 | 492       | 61.90   | 14.88 | 4.1    | Baseline  |

(For comparison, Table 2, entry 10)

# Supplementary Material (ESI) for Organic & Biomolecular Chemistry  
# This journal is (c) The Royal Society of Chemistry 2010



## Peak Report

PMK-02-360-Chiral+racemate-coltm- OD-8%ipa/hex

Report produced on 2010/7/16 at 上午 10:58:42 by Put your name here

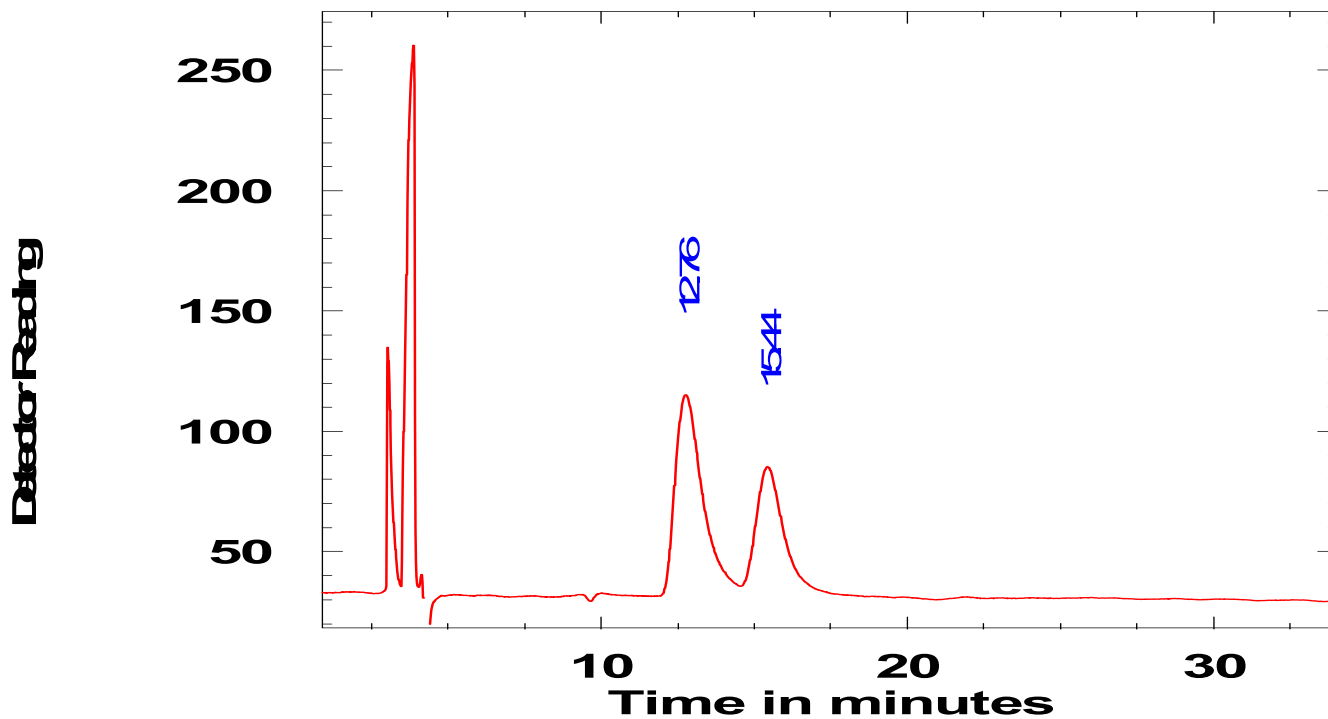

| Peak # | Begin | End   | Peak Area | Maximum | Time  | Area % | Begins as |
|--------|-------|-------|-----------|---------|-------|--------|-----------|
| 1      | 11.98 | 14.54 | 4933      | 115.19  | 12.76 | 63.2   | Baseline  |
| 2      | 14.63 | 17.00 | 2876      | 85.31   | 15.44 | 36.8   | Baseline  |

(For comparison, Table 2, entry 11)

# Supplementary Material (ESI) for Organic & Biomolecular Chemistry

# This journal is (c) The Royal Society of Chemistry 2010



## Peak Report

PMK-02-394-racemate-colm-IA-5%ipa/Hex

Report produced on 2010/8/14 at 下午 03:54:07 by Put your name here

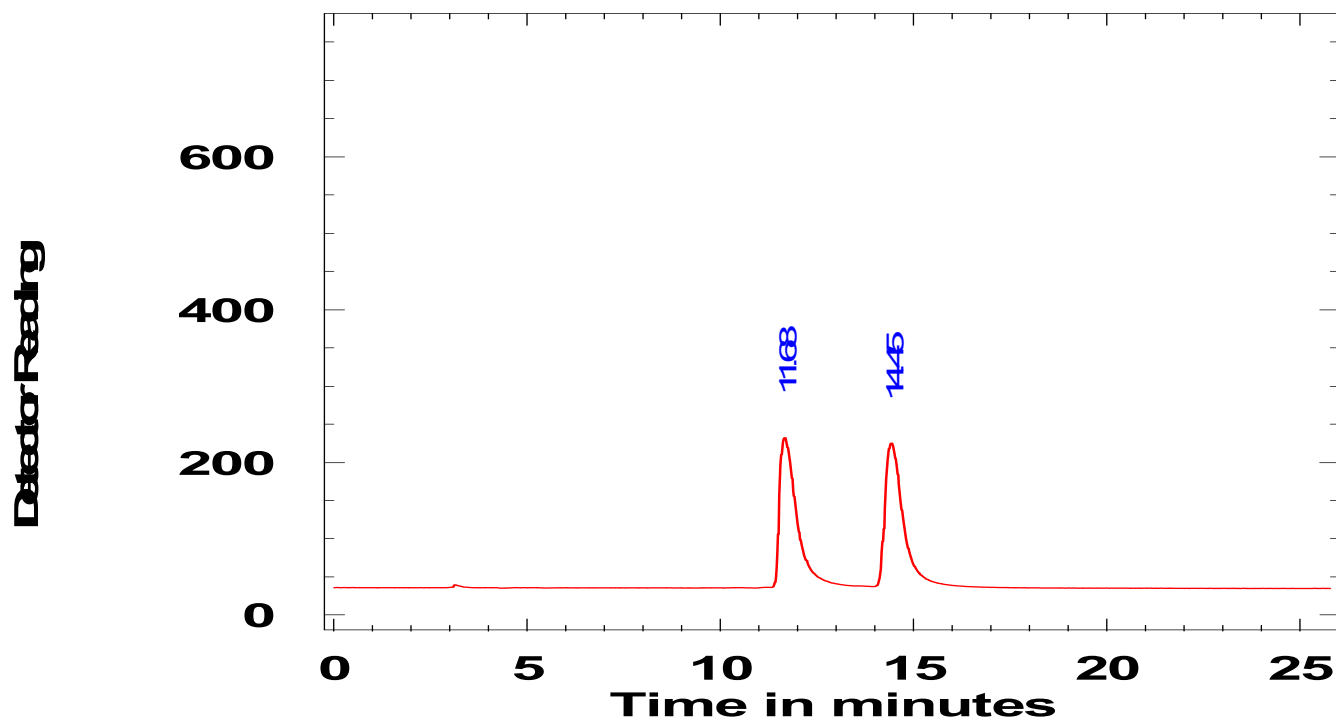

| Peak # | Begin | End   | Peak Area | Maximum | Time  | Area % | Begins as |
|--------|-------|-------|-----------|---------|-------|--------|-----------|
| 1      | 11.32 | 13.16 | 5997      | 232.01  | 11.68 | 49.8   | Baseline  |
| 2      | 14.06 | 16.54 | 6051      | 225.15  | 14.45 | 50.2   | Baseline  |



# Peak Report

PMK-02-394-chiral-colm-IA-5%ipa/Hex

Report produced on 2010/8/14 at 下午 03:52:11 by Put your name here

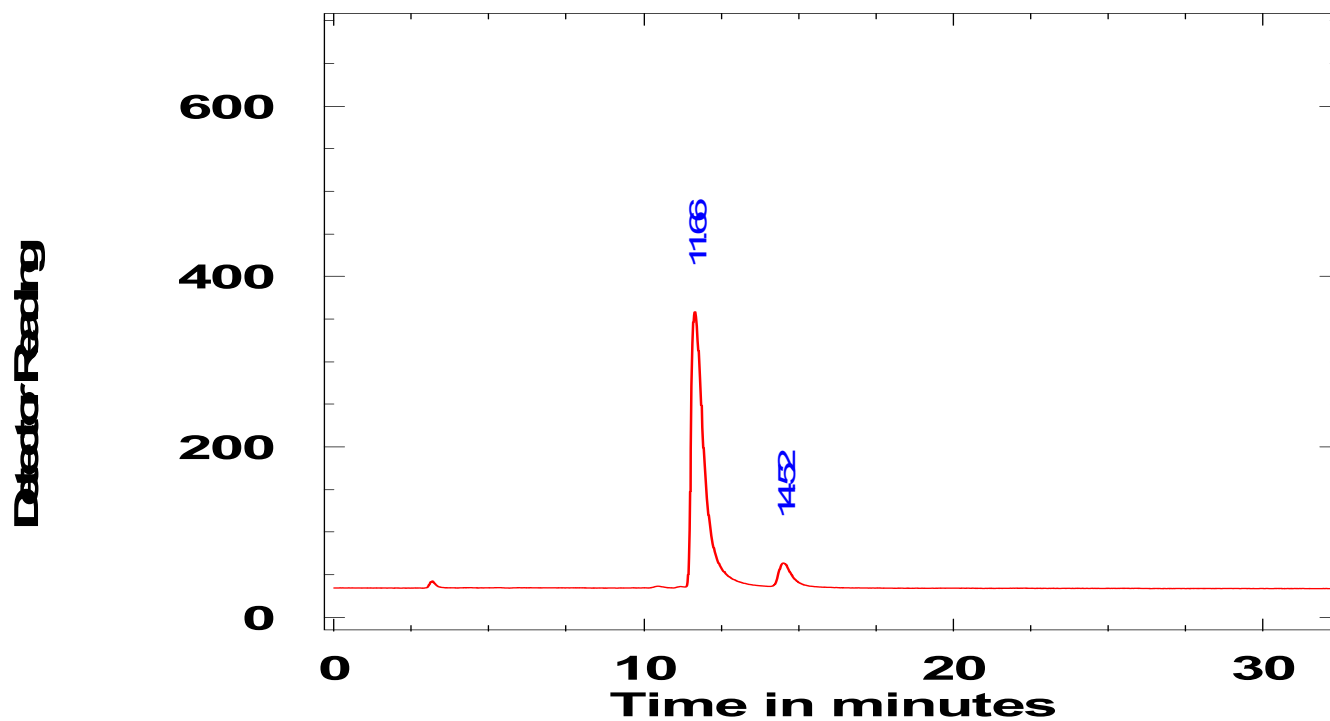

| Peak # | Begin | End   | Peak Area | Maximum | Time  | Area % | Begins as |
|--------|-------|-------|-----------|---------|-------|--------|-----------|
| 1      | 11.30 | 13.73 | 9585      | 358.51  | 11.66 | 95.0   | Baseline  |
| 2      | 14.19 | 14.90 | 507       | 64.00   | 14.52 | 5.0    | Baseline  |

(For comparison, Table 2, entry 11)  
# Supplementary Material (ESI) for Organic & Biomolecular Chemistry  
# This journal is (c) The Royal Society of Chemistry 2010



## Peak Report

PMK-02-394-chiral+racemate-coltm-IA-5%ipa/Hex

Report produced on 2010/8/14 at 下午 03:49:59 by Put your name here

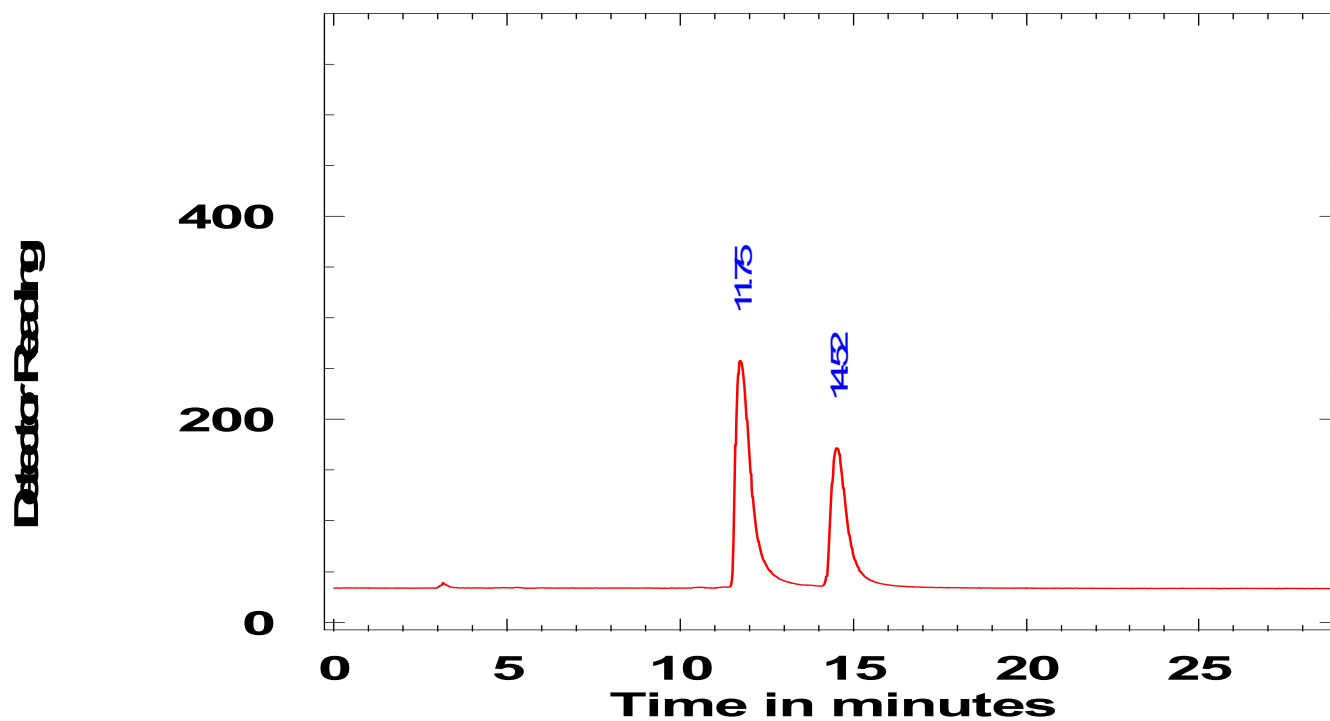

| Peak # | Begin | End   | Peak Area | Maximum | Time  | Area % | Begins as |
|--------|-------|-------|-----------|---------|-------|--------|-----------|
| 1      | 11.34 | 13.42 | 6963      | 257.86  | 11.75 | 60.8   | Baseline  |
| 2      | 14.09 | 16.47 | 4490      | 172.03  | 14.52 | 39.2   | Baseline  |

Fig S166. HPLC analysis of racemic compound 3I. (For comparison, Table 2, entry 12)

# Supplementary Material (ESI) for Organic & Biomolecular Chemistry  
# This journal is (c) The Royal Society of Chemistry 2010



## Peak Report

PMK-02-395-racemate-colm-IA-5%ipa/Hex

Report produced on 2010/8/14 at 下午 03:48:15 by Put your name here

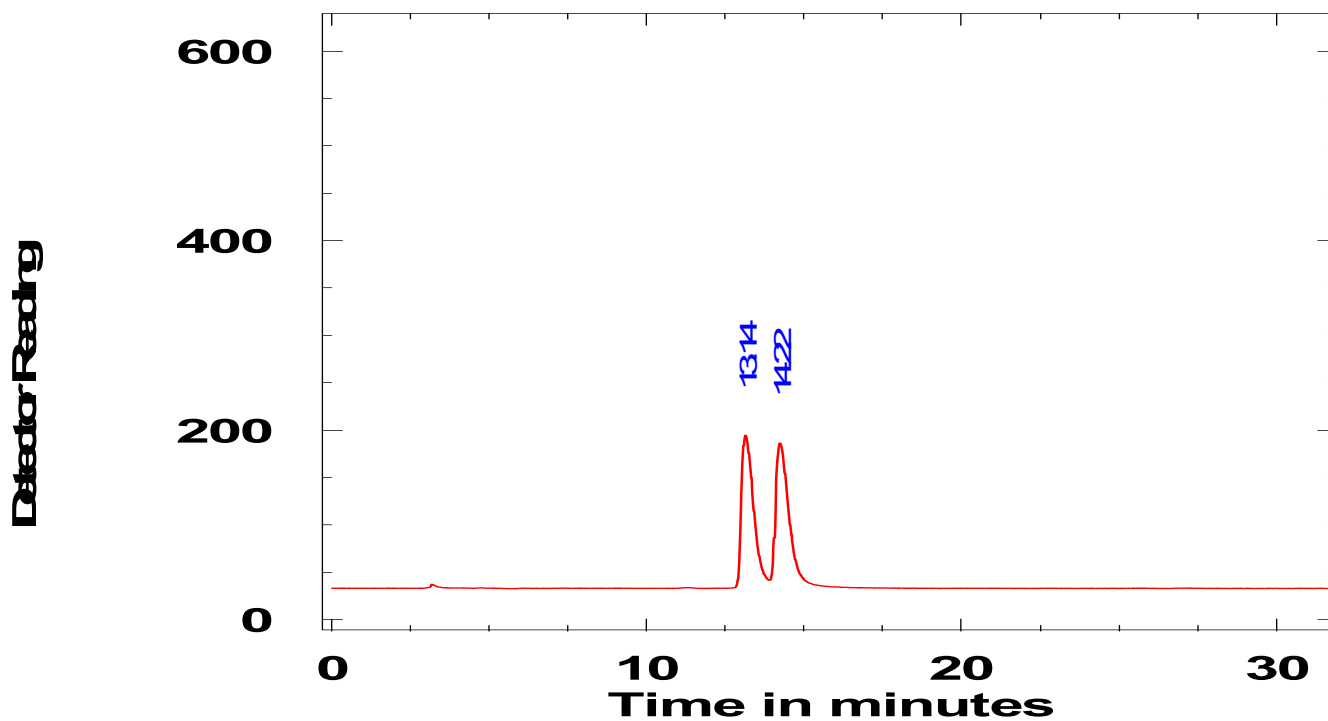

| Peak # | Begin | End   | Peak Area | Maximum | Time  | Area % | Begins as |
|--------|-------|-------|-----------|---------|-------|--------|-----------|
| 1      | 12.83 | 13.88 | 4079      | 194.69  | 13.14 | 49.9   | Baseline  |
| 2      | 13.93 | 15.68 | 4102      | 186.28  | 14.22 | 50.1   | Baseline  |



# Peak Report

PMK-02-395-chiral-colm-IA-5%ipa/Hex

Report produced on 2010/8/14 at 下午 03:45:14 by Put your name here

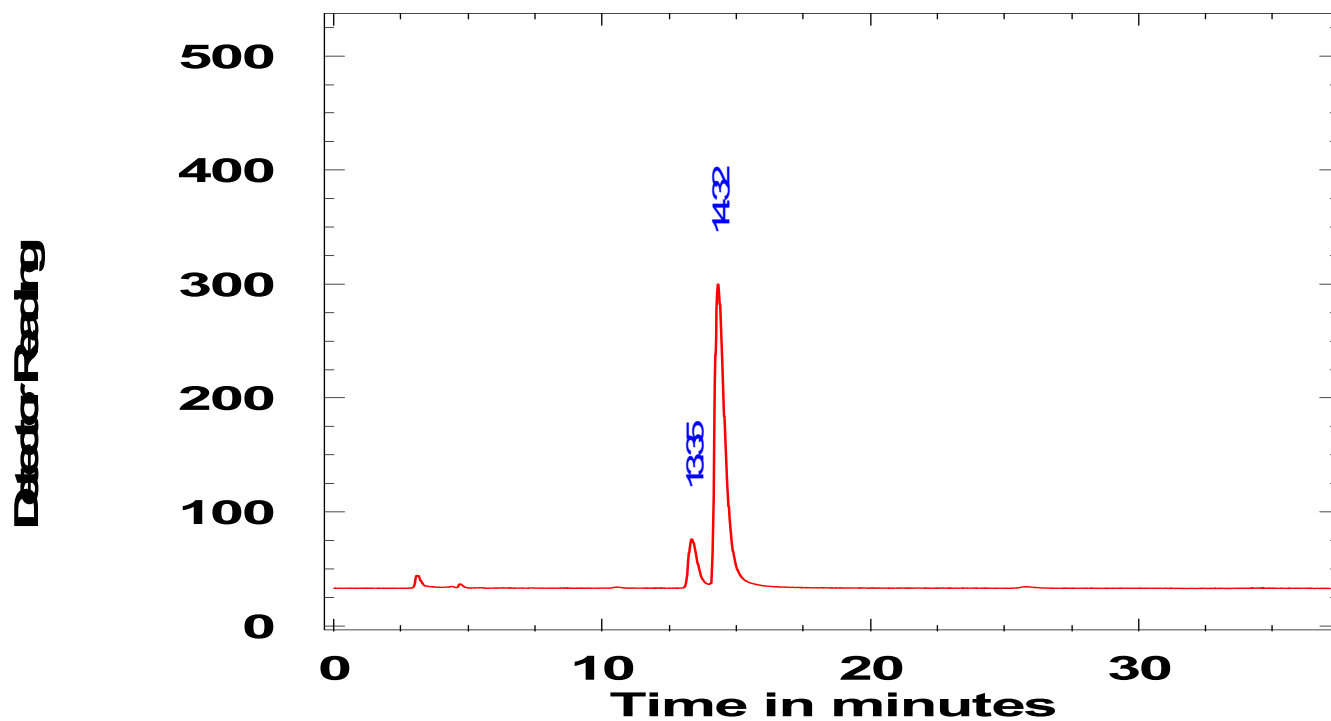

| Peak # | Begin | End   | Peak Area | Maximum | Time  | Area % | Begins as |
|--------|-------|-------|-----------|---------|-------|--------|-----------|
| 1      | 13.11 | 13.75 | 763       | 76.32   | 13.35 | 9.8    | Baseline  |
| 2      | 13.91 | 16.57 | 7046      | 300.01  | 14.32 | 90.2   | Baseline  |

(For comparison, Table 2, entry 12)

# Supplementary Material (ESI) for Organic & Biomolecular Chemistry

# This journal is (c) The Royal Society of Chemistry 2010



## Peak Report

PMK-02-395-chiral+racemate-collm-IA-5%ipa/Hex

Report produced on 2010/8/14 at 下午 03:42:40 by Put your name here

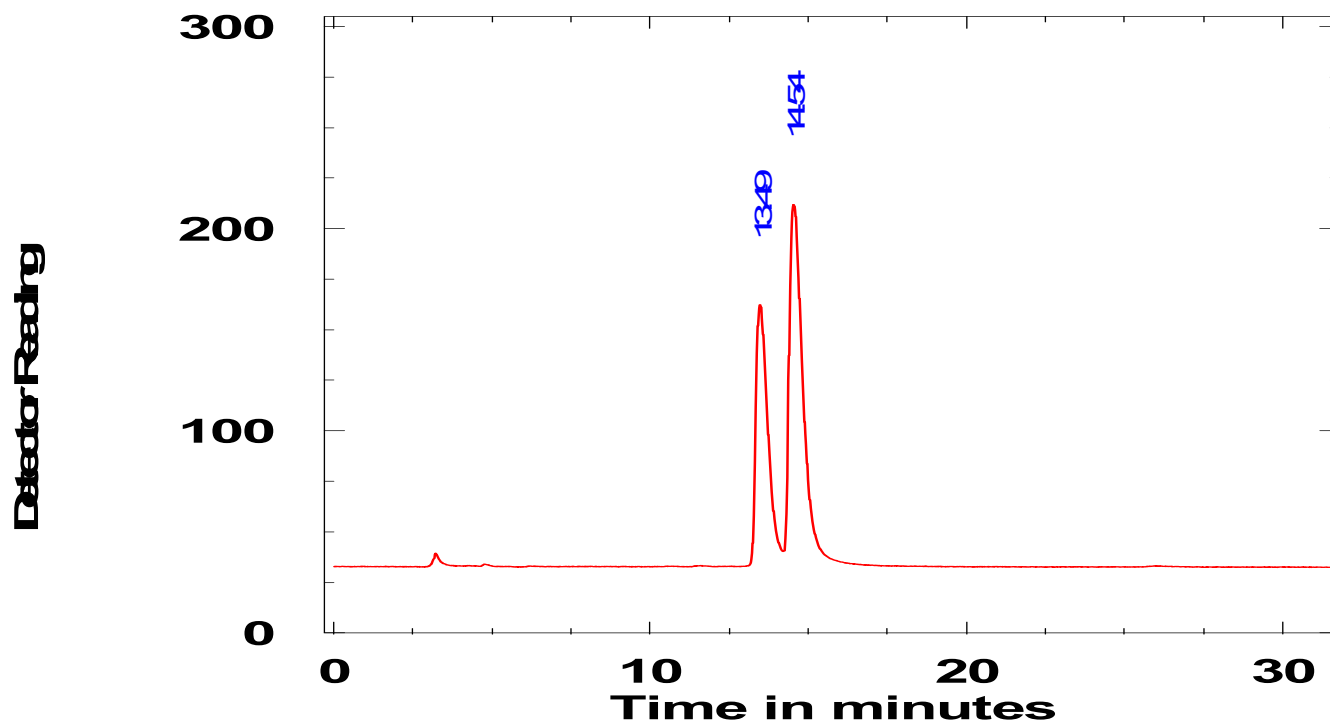

| Peak # | Begin | End   | Peak Area | Maximum | Time  | Area % | Begins as |
|--------|-------|-------|-----------|---------|-------|--------|-----------|
| 1      | 13.13 | 14.09 | 3097      | 162.45  | 13.49 | 38.6   | Baseline  |
| 2      | 14.22 | 16.85 | 4916      | 211.95  | 14.54 | 61.4   | Baseline  |



Fig S169. HPLC analysis of compound 3m obtained from cat (S)-I. (Table 2, entry 13)

# Supplementary Material (ESI) for Organic & Biomolecular Chemistry  
# This journal is (c) The Royal Society of Chemistry 2010



## Peak Report

PMK-02-393-chiral-(S-Enantiomer)-colm-IA-8%ipa/Hex

Report produced on 2010/9/7 at 下午 03:02:29 by Put your name here

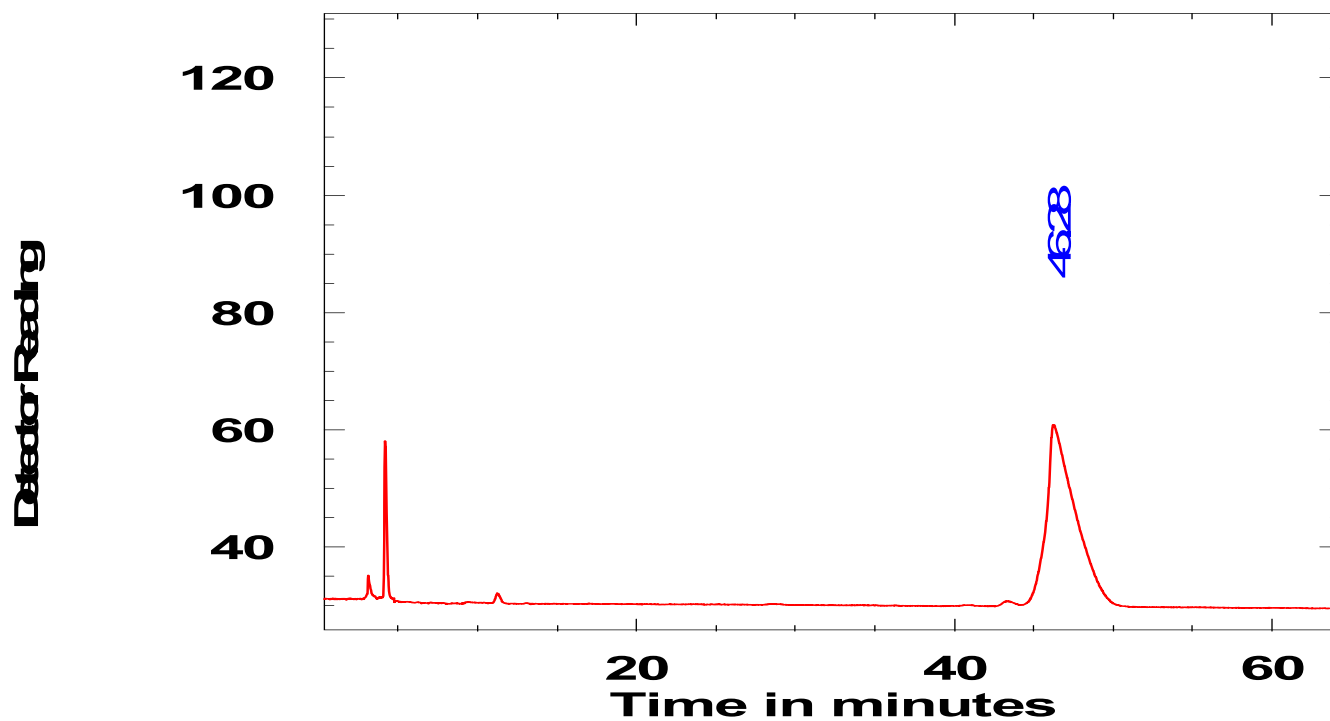

| Peak # | Begin | End   | Peak Area | Maximum | Time  | Area % | Begins as |
|--------|-------|-------|-----------|---------|-------|--------|-----------|
| 1      | 44.35 | 50.20 | 3848      | 60.84   | 46.28 | 100.0  | Baseline  |

(For comparison, Table 2, entry 13)  
# Supplementary Material (ESI) for Organic & Biomolecular Chemistry  
# This journal is (c) The Royal Society of Chemistry 2010



## Peak Report

PMK-02-405-chiral-(R-Enantiomer)-colm-IA-8%ipa/Hex

Report produced on 2010/9/7 at 下午 12:32:31 by Put your name here

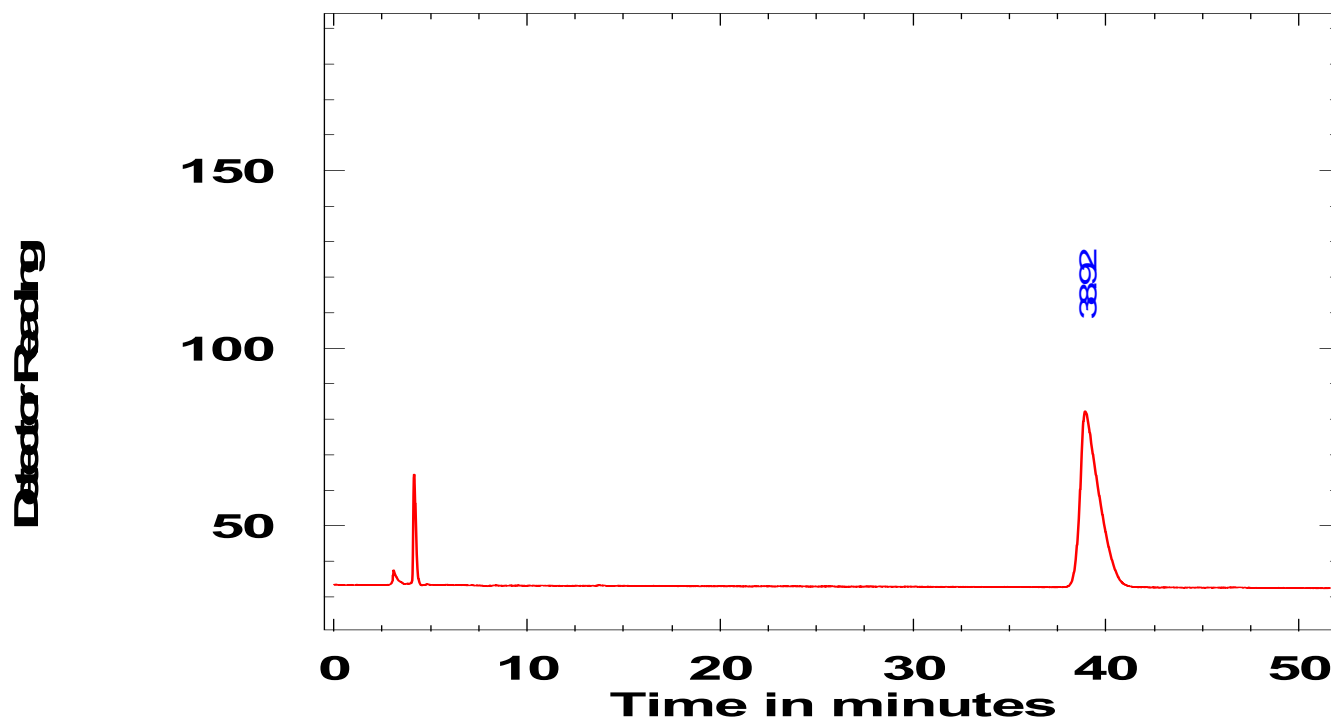

| Peak # | Begin | End   | Peak Area | Maximum | Time  | Area % | Begins as |
|--------|-------|-------|-----------|---------|-------|--------|-----------|
| 1      | 38.01 | 41.39 | 3354      | 82.25   | 38.92 | 100.0  | Baseline  |

(For comparison, Table 2, entry 13)

# Supplementary Material (ESI) for Organic & Biomolecular Chemistry

# This journal is (c) The Royal Society of Chemistry 2010



## Peak Report

PMK-02-393+405-chiral-(S+R-Enantiomer)-colm-IA-8%ipa/Hex

Report produced on 2010/9/7 at 下午 01:34:43 by Put your name here

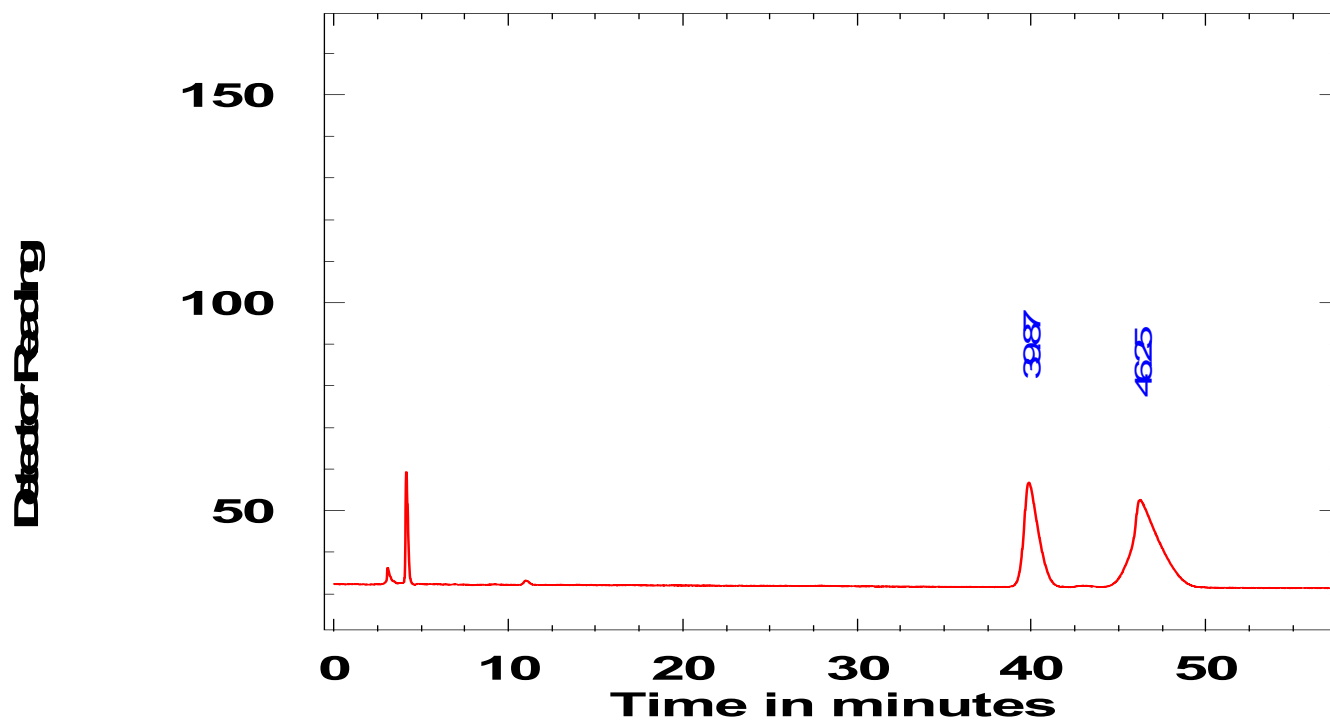

| Peak # | Begin | End   | Peak Area | Maximum | Time  | Area % | Begins as |
|--------|-------|-------|-----------|---------|-------|--------|-----------|
| 1      | 38.67 | 41.33 | 1398      | 56.79   | 39.87 | 37.9   | Baseline  |
| 2      | 44.25 | 49.48 | 2288      | 52.65   | 46.25 | 62.1   | Baseline  |

Fig S172. HPLC analysis of compound 3n obtained from cat (S)-I. (Table 2, entry 14)

# Supplementary Material (ESI) for Organic & Biomolecular Chemistry  
# This journal is (c) The Royal Society of Chemistry 2010

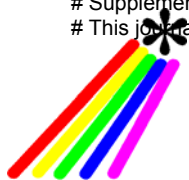

## Peak Report

PMK-02-404-(S-enantiomer)chiral-colm-IA-15%ipa/Hex

Report produced on 2010/9/8 at 下午 02:58:01 by Put your name here

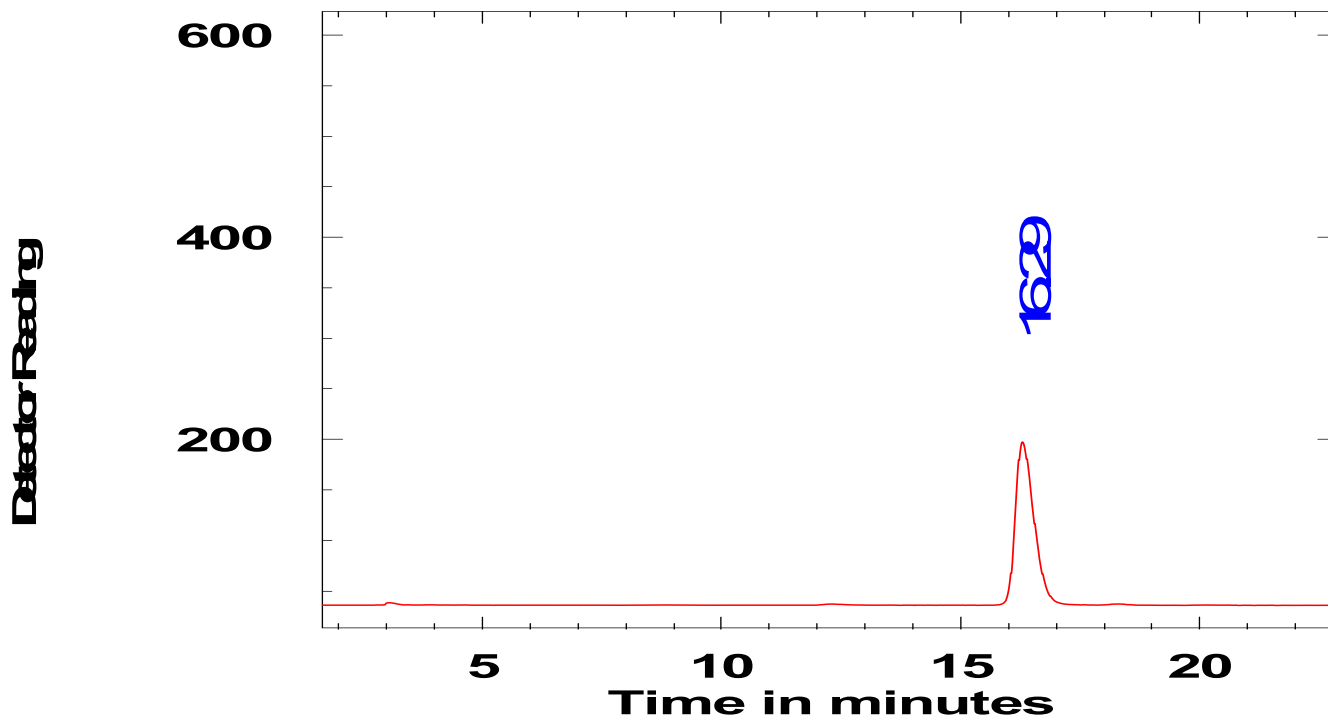

| Peak # | Begin | End   | Peak Area | Maximum | Time  | Area % | Begins as |
|--------|-------|-------|-----------|---------|-------|--------|-----------|
| 1      | 15.82 | 17.41 | 4343      | 197.54  | 16.29 | 100.0  | Baseline  |

(For comparison Table 2, entry 14)  
# Supplementary Material (ESI) for Organic & Biomolecular Chemistry  
# This journal is (c) The Royal Society of Chemistry 2010

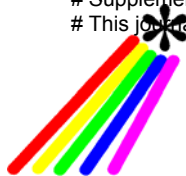

## Peak Report

PMK-02-407-(R-enantiomer)chiral-colm-IA-15%ipa/Hex

Report produced on 2010/9/8 at 下午 02:25:52 by Put your name here

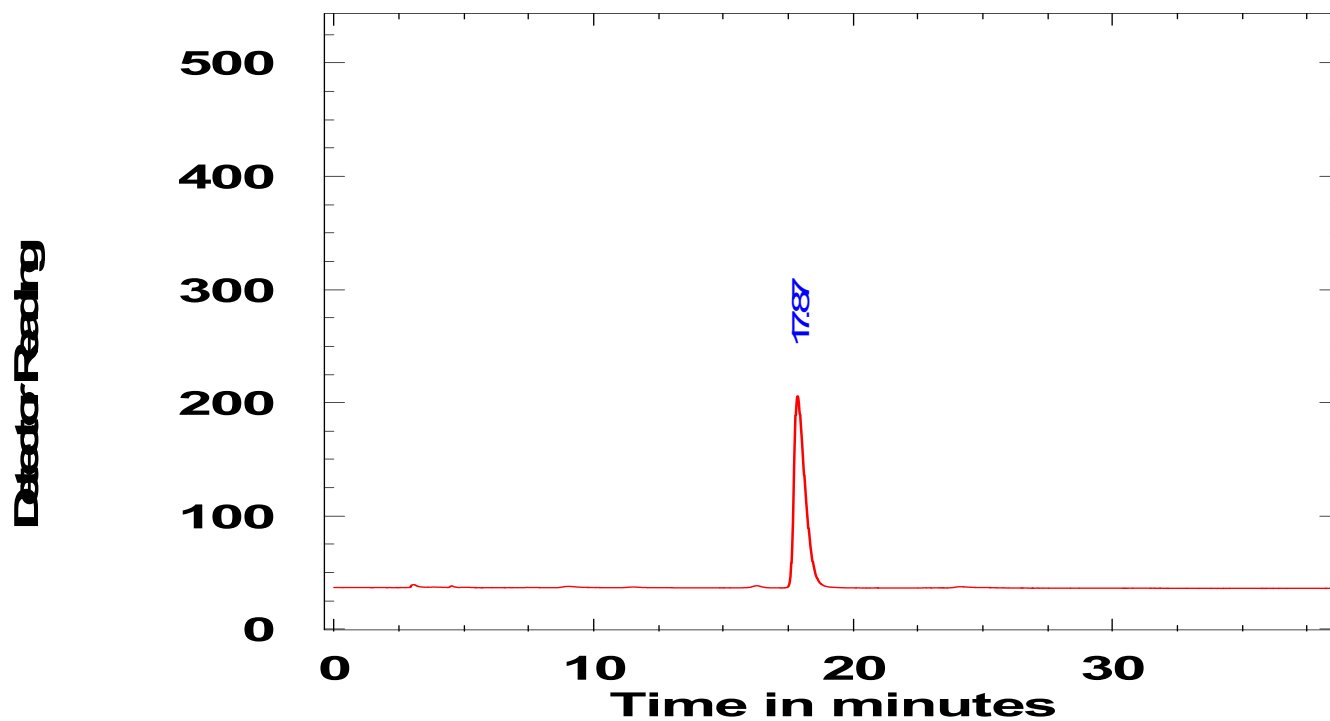

| Peak # | Begin | End   | Peak Area | Maximum | Time  | Area % | Begins as |
|--------|-------|-------|-----------|---------|-------|--------|-----------|
| 1      | 17.51 | 19.01 | 4982      | 206.04  | 17.87 | 100.0  | Baseline  |

(For comparison, Table 2, entry 14)

# Supplementary Material (ESI) for Organic & Biomolecular Chemistry

# This journal is (c) The Royal Society of Chemistry 2010



## Peak Report

PMK-02-404+407-(S+R-enantiomer)chiral-colm-IA-15%ipa/Hex

Report produced on 2010/9/8 at 下午 03:35:18 by Put your name here

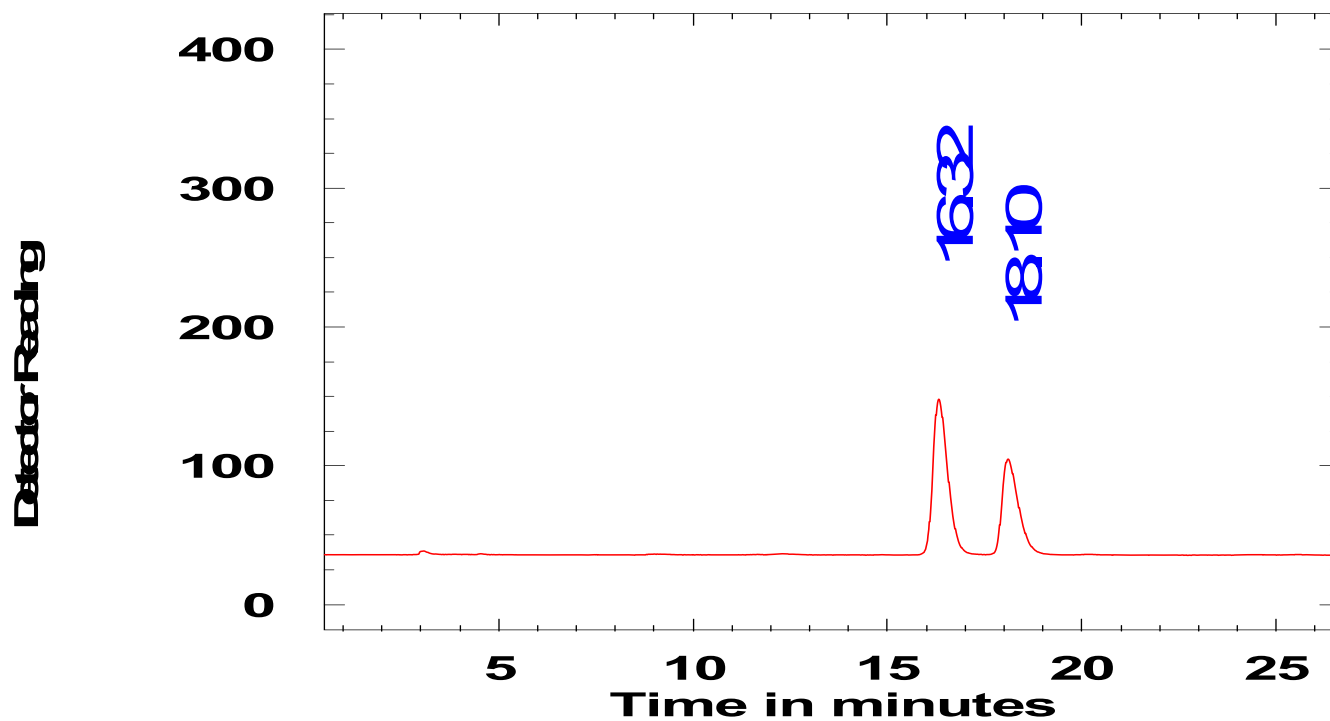

| Peak # | Begin | End   | Peak Area | Maximum | Time  | Area % | Begins as |
|--------|-------|-------|-----------|---------|-------|--------|-----------|
| 1      | 15.80 | 16.98 | 2859      | 147.92  | 16.32 | 59.7   | Baseline  |
| 2      | 17.70 | 18.92 | 1929      | 104.66  | 18.10 | 40.3   | Baseline  |

Fig S175. HPLC analysis of compound 3o obtained from cat (S)-I. (Table 2, entry 15)

# Supplementary Material (ESI) for Organic & Biomolecular Chemistry  
# This journal is (c) The Royal Society of Chemistry 2010



## Peak Report

PMK-02-406-(S-enantiomer)chiral-colm-IA-15%ipa/Hex

Report produced on 2010/9/8 at 上午 11:23:51 by Put your name here

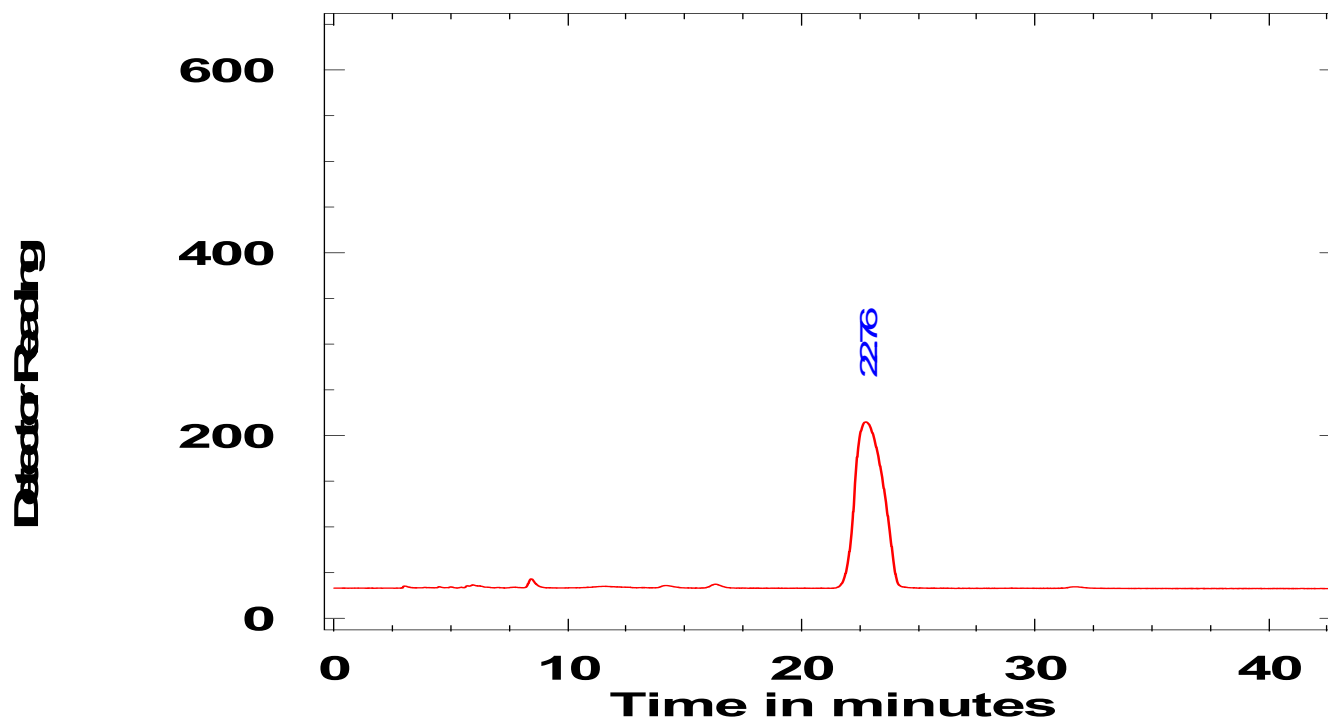

| Peak # | Begin | End   | Peak Area | Maximum | Time  | Area % | Begins as |
|--------|-------|-------|-----------|---------|-------|--------|-----------|
| 1      | 21.54 | 24.26 | 14841     | 215.11  | 22.76 | 100.0  | Baseline  |

Fig S176. HPLC analysis of compound 3o obtained from cat (R)-I.

(For comparison, Table 2, entry 15)  
# Supplementary Material (ESI) for Organic & Biomolecular Chemistry  
# This journal is (c) The Royal Society of Chemistry 2010

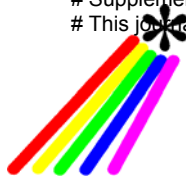

## Peak Report

PMK-02-408-(R-enantiomer)chiral-colm-IA-15%ipa/Hex

Report produced on 2010/9/8 at 上午 10:34:02 by Put your name here

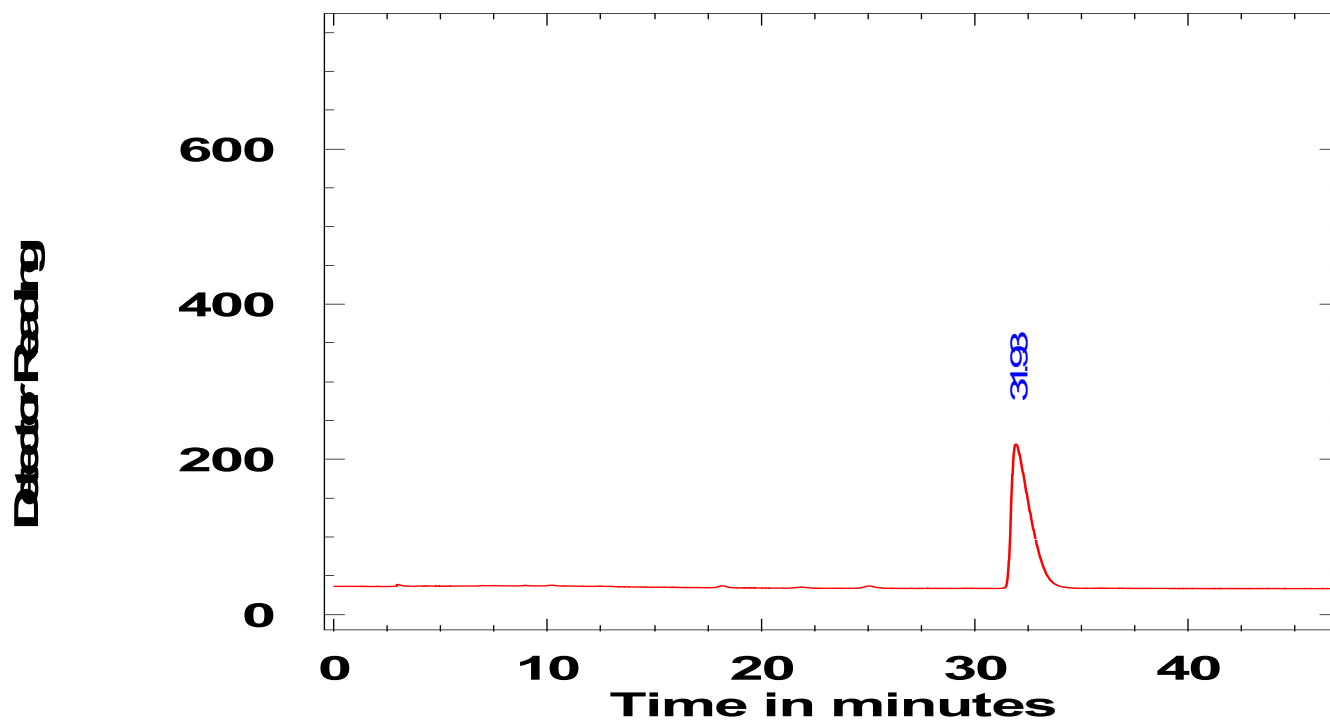

| Peak # | Begin | End   | Peak Area | Maximum | Time  | Area % | Begins as |
|--------|-------|-------|-----------|---------|-------|--------|-----------|
| 1      | 31.45 | 34.16 | 11019     | 219.65  | 31.93 | 100.0  | Baseline  |



(For comparison, Table 2, entry 15)

# Supplementary Material (ESI) for Organic & Biomolecular Chemistry  
# This journal is (c) The Royal Society of Chemistry 2010



## Peak Report

PMK-02-406+408-(S+R-enantiomer)chiral-colm-IA-15%ipa/Hex

Report produced on 2010/9/8 at 下午 12:11:30 by Put your name here

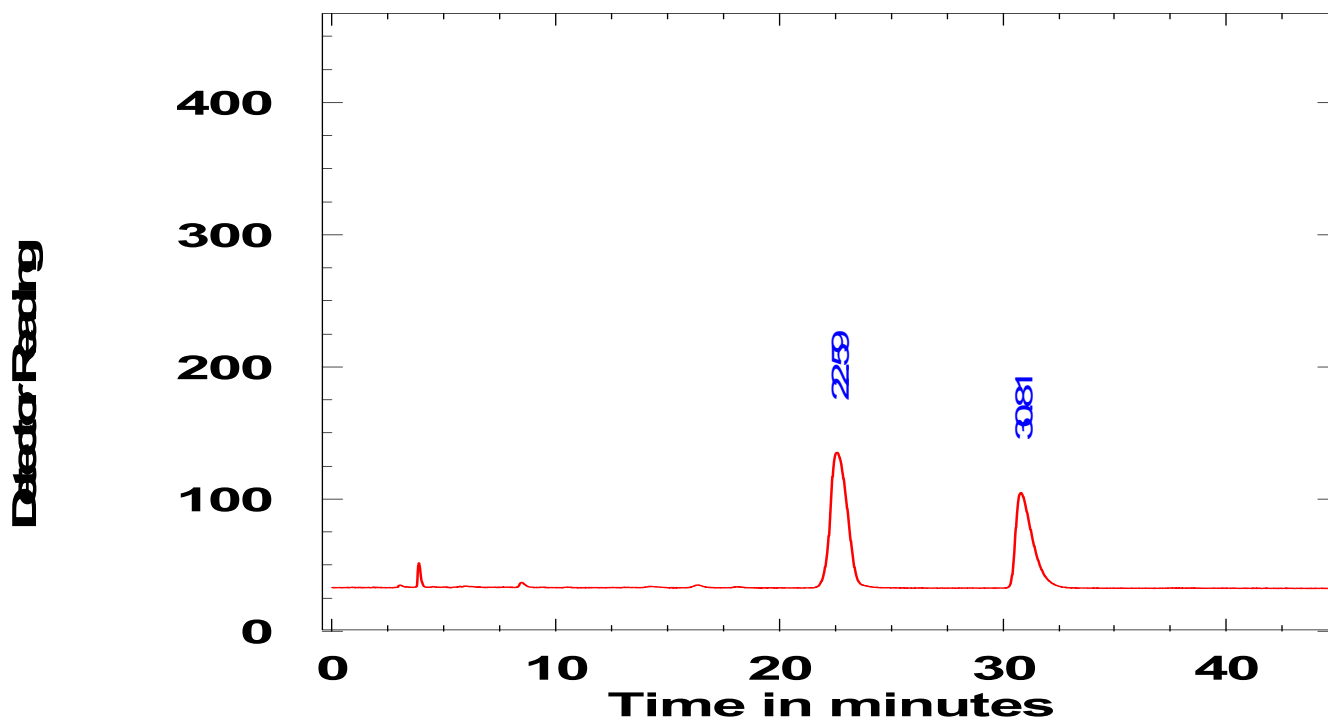

| Peak # | Begin | End   | Peak Area | Maximum | Time  | Area % | Begins as |
|--------|-------|-------|-----------|---------|-------|--------|-----------|
| 1      | 21.61 | 23.87 | 5268      | 135.17  | 22.59 | 58.9   | Baseline  |
| 2      | 30.22 | 32.55 | 3677      | 104.75  | 30.81 | 41.1   | Baseline  |
